# Supplementary material for: Unveiling Optimal Models for Phenotype Prediction in Soybean Branching: An In-depth Examination of 11 Non-linear Regression Models, Highlighting SVR and SHAP Importance
Source: Research Square preprint supplement (doi:10.21203/rs.3.rs-3232751/v1), 2023-09-07
Supplement: Supplementary file 1 [file 21b6639e22a7bdefd6e382e3.xlsx]

## Sheet: 253 hit
Feature Names	Mean value	SHAP ABS	SHAP ranking	gene	Similar sequences	Species	Query coverage (%)	Total score	E value	Identity (%)
ss715579802	0.000788336	0.000788336	1	Glyma.01G153300	Glyma.01G153300.4 dsid=glyma.Wm82.gnm4.ann1.Glyma.01G153300.4 pacid=41114401 polypeptide=Glyma.01G153300.4.p locus=Glyma.01G153300 ID=Glyma.01G153300.4.Wm82.a4.v1 annot-version=Wm82.a4.v1	Glycine max	71	86	7.96×10-39	1
ss715579797	0.000788198	0.000788198	2	no hit
ss715579940	0.000776019	0.000776019	3	no hit
ss715579958	0.000691516	0.000691516	4	no hit
ss715580232	0.000651074	0.000651074	5	no hit
ss715579938	0.000648627	0.000648627	6	no hit
ss715579365	0.000648402	0.000648402	7	no hit
ss715580876	0.000642228	0.000642228	8	no hit
ss715580210	0.000633094	0.000633094	9	no hit
ss715579996	0.000631928	0.000631928	10	no hit
ss715579779	0.000631916	0.000631916	11	no hit
ss715579863	0.000631828	0.000631828	12	no hit
ss715579949	0.00063177	0.00063177	13	no hit
ss715579946	0.000631742	0.000631742	14	no hit
ss715580837	0.000631737	0.000631737	15	no hit
ss715579945	0.000579475	0.000579475	16	no hit
ss715579312	0.000577512	0.000577512	17	no hit
ss715580865	0.00057674	0.00057674	18	no hit
ss715580874	0.000574826	0.000574826	19	no hit
ss715580867	0.000574472	0.000574472	20	no hit
ss715580868	0.000572971	0.000572971	21	Glyma.09G084700	Glyma.09G084700.1 dsid=glyma.Wm82.gnm4.ann1.Glyma.09G084700.1 pacid=41131898 polypeptide=Glyma.09G084700.1.p locus=Glyma.09G084700 ID=Glyma.09G084700.1.Wm82.a4.v1 annot-version=Wm82.a4.v1	Glycine max	68	70	6.24×10-30	0.951
ss715580833	0.00056668	0.00056668	22	no hit
ss715578683	0.000559316	0.000559316	23	no hit
ss715579933	0.000553395	0.000553395	24	Glyma.01G161900	Glyma.01G161900.1 dsid=glyma.Wm82.gnm4.ann1.Glyma.01G161900.1 pacid=41115581 polypeptide=Glyma.01G161900.1.p locus=Glyma.01G161900 ID=Glyma.01G161900.1.Wm82.a4.v1 annot-version=Wm82.a4.v1	Glycine max	41	50	8.19×10-19	1
ss715579936	0.000544789	0.000544789	25	no hit
ss715580247	0.000541933	0.000541933	26	no hit
ss715578759	0.000527792	0.000527792	27	no hit
ss715580335	0.000527791	0.000527791	28	Glyma.01G196300	Glyma.01G196300.1 dsid=glyma.Wm82.gnm4.ann1.Glyma.01G196300.1 pacid=41115426 polypeptide=Glyma.01G196300.1.p locus=Glyma.01G196300 ID=Glyma.01G196300.1.Wm82.a4.v1 annot-version=Wm82.a4.v1	Glycine max	44	53	1.76×10-20	1
ss715578844	0.000527774	0.000527774	29	no hit
ss715578758	0.000527773	0.000527773	30	no hit
ss715579159	0.00052776	0.00052776	31	no hit
ss715578872	0.000527753	0.000527753	32	no hit
ss715578526	0.000527747	0.000527747	33	no hit
ss715578986	0.000527714	0.000527714	34	no hit
ss715578582	0.000527699	0.000527699	35	no hit
ss715578846	0.000527695	0.000527695	36	no hit
ss715579584	0.000527664	0.000527664	37	Glyma.01G005000	Glyma.01G005000.1 dsid=glyma.Wm82.gnm4.ann1.Glyma.01G005000.1 pacid=41116521 polypeptide=Glyma.01G005000.1.p locus=Glyma.01G005000 ID=Glyma.01G005000.1.Wm82.a4.v1 annot-version=Wm82.a4.v1	Glycine max	100	121	2.78×10-58	1
ss715579674	0.000527664	0.000527664	38	no hit
ss715579937	0.00052766	0.00052766	39	Glyma.01G162600	Glyma.01G162600.1 dsid=glyma.Wm82.gnm4.ann1.Glyma.01G162600.1 pacid=41117948 polypeptide=Glyma.01G162600.1.p locus=Glyma.01G162600 ID=Glyma.01G162600.1.Wm82.a4.v1 annot-version=Wm82.a4.v1	Glycine max	88	107	1.69×10-50	1
ss715583635	0.000527657	0.000527657	40	no hit
ss715579364	0.000527645	0.000527645	41	no hit
ss715578874	0.000527644	0.000527644	42	no hit
ss715578942	0.00052764	0.00052764	43	no hit
ss715578786	0.000527622	0.000527622	44	no hit
ss715579468	0.000527621	0.000527621	45	no hit
ss715578797	0.000527615	0.000527615	46	no hit
ss715580618	0.000527612	0.000527612	47	no hit
ss715578862	0.000527602	0.000527602	48	no hit
ss715579948	0.0005276	0.0005276	49	Glyma.01G164000	Glyma.01G164000.1 dsid=glyma.Wm82.gnm4.ann1.Glyma.01G164000.1 pacid=41117651 polypeptide=Glyma.01G164000.1.p locus=Glyma.01G164000 ID=Glyma.01G164000.1.Wm82.a4.v1 annot-version=Wm82.a4.v1	Glycine max	45	52	6.33×10-20	0.982
ss715578793	0.000527597	0.000527597	50	no hit
ss715583624	0.000527595	0.000527595	51	no hit
ss715579090	0.000527589	0.000527589	52	no hit
ss715583622	0.000527562	0.000527562	53	no hit
ss715580742	0.000527554	0.000527554	54	no hit
ss715578756	0.000527551	0.000527551	55	no hit
ss715579140	0.000527543	0.000527543	56	no hit
ss715579259	0.000527543	0.000527543	57	no hit
ss715580644	0.000527538	0.000527538	58	Glyma.01G233500	Glyma.01G233500.1 dsid=glyma.Wm82.gnm4.ann1.Glyma.01G233500.1 pacid=41116729 polypeptide=Glyma.01G233500.1.p locus=Glyma.01G233500 ID=Glyma.01G233500.1.Wm82.a4.v1 annot-version=Wm82.a4.v1	Glycine max	39	47	3.81×10-17	1
ss715580325	0.00052753	0.00052753	59	no hit
ss715578675	0.000527526	0.000527526	60	no hit
ss715578509	0.000527519	0.000527519	61	no hit
ss715578520	0.000527517	0.000527517	62	no hit
ss715579158	0.000527506	0.000527506	63	no hit
ss715580616	0.000527478	0.000527478	64	no hit
ss715580012	0.000527468	0.000527468	65	no hit
ss715578499	0.000527455	0.000527455	66	Glyma.01G014500	Glyma.01G014500.3 dsid=glyma.Wm82.gnm4.ann1.Glyma.01G014500.3 pacid=41117450 polypeptide=Glyma.01G014500.3.p locus=Glyma.01G014500 ID=Glyma.01G014500.3.Wm82.a4.v1 annot-version=Wm82.a4.v1	Glycine max	98	111	1.01×10-52	0.975
ss715580352	0.000527454	0.000527454	67	Glyma.01G198900	Glyma.01G198900.1 dsid=glyma.Wm82.gnm4.ann1.Glyma.01G198900.1 pacid=41114463 polypeptide=Glyma.01G198900.1.p locus=Glyma.01G198900 ID=Glyma.01G198900.1.Wm82.a4.v1 annot-version=Wm82.a4.v1	Glycine max	100	121	2.78×10-58	1
ss715580045	0.000527451	0.000527451	68	no hit
ss715580039	0.000527383	0.000527383	69	no hit
ss715579464	0.000527378	0.000527378	70	no hit
ss715580390	0.000527331	0.000527331	71	no hit
ss715578831	0.000527314	0.000527314	72	no hit
ss715579672	0.000522015	0.000522015	73	no hit
ss715580541	0.00051994	0.00051994	74	no hit
ss715579290	0.00050506	0.00050506	75	no hit
ss715579472	0.000494675	0.000494675	76	no hit
ss715579177	0.000474821	0.000474821	77	no hit
ss715579766	-0.00047324	0.00047324	78	no hit
ss715578484	0.000467333	0.000467333	79	no hit
ss715578619	0.000465545	0.000465545	80	Glyma.01G018651	Glyma.01G018651.1 dsid=glyma.Wm82.gnm4.ann1.Glyma.01G018651.1 pacid=41116032 polypeptide=Glyma.01G018651.1.p locus=Glyma.01G018651 ID=Glyma.01G018651.1.Wm82.a4.v1 annot-version=Wm82.a4.v1	Glycine max	74	90	4.76×10-41	1
ss715580841	-0.000464995	0.000464995	81	no hit
ss715578604	0.000462686	0.000462686	82	Glyma.04G059600	Glyma.04G059600.1 dsid=glyma.Wm82.gnm4.ann1.Glyma.04G059600.1 pacid=41085082 polypeptide=Glyma.04G059600.1.p locus=Glyma.04G059600 ID=Glyma.04G059600.1.Wm82.a4.v1 annot-version=Wm82.a4.v1	Glycine max	23	28	1.39×10-6	1
ss715580885	-0.000461996	0.000461996	83	no hit
ss715581649	0.000459976	0.000459976	84	no hit
ss715580739	0.000459937	0.000459937	85	Glyma.01G005800	Glyma.01G005800.1 dsid=glyma.Wm82.gnm4.ann1.Glyma.01G005800.1 pacid=41115889 polypeptide=Glyma.01G005800.1.p locus=Glyma.01G005800 ID=Glyma.01G005800.1.Wm82.a4.v1 annot-version=Wm82.a4.v1	Glycine max	100	121	2.78×10-58	1
ss715579487	-0.000456191	0.000456191	86	no hit
ss715579721	0.000448793	0.000448793	87	no hit
ss715581449	-0.000443914	0.000443914	88	Glyma.02G022100	Glyma.02G022100.1 dsid=glyma.Wm82.gnm4.ann1.Glyma.02G022100.1 pacid=41098127 polypeptide=Glyma.02G022100.1.p locus=Glyma.02G022100 ID=Glyma.02G022100.1.Wm82.a4.v1 annot-version=Wm82.a4.v1	Glycine max	100	121	2.78×10-58	1
ss715579770	-0.000443181	0.000443181	89	Glyma.01G152000	Glyma.01G152000.1 dsid=glyma.Wm82.gnm4.ann1.Glyma.01G152000.1 pacid=41116972 polypeptide=Glyma.01G152000.1.p locus=Glyma.01G152000 ID=Glyma.01G152000.1.Wm82.a4.v1 annot-version=Wm82.a4.v1	Glycine max	100	121	2.78×10-58	1
ss715579498	-0.000440184	0.000440184	90	no hit
ss715579574	-0.00043983	0.00043983	91	no hit
ss715578461	-0.000439709	0.000439709	92	Glyma.01G013300	Glyma.01G013300.1 dsid=glyma.Wm82.gnm4.ann1.Glyma.01G013300.1 pacid=41116582 polypeptide=Glyma.01G013300.1.p locus=Glyma.01G013300 ID=Glyma.01G013300.1.Wm82.a4.v1 annot-version=Wm82.a4.v1	Glycine max	100	121	2.78×10-58	1
ss715579742	-0.000439439	0.000439439	93	Glyma.01G149700	Glyma.01G149700.1 dsid=glyma.Wm82.gnm4.ann1.Glyma.01G149700.1 pacid=41114368 polypeptide=Glyma.01G149700.1.p locus=Glyma.01G149700 ID=Glyma.01G149700.1.Wm82.a4.v1 annot-version=Wm82.a4.v1	Glycine max	100	121	2.78×10-58	1
ss715579532	-0.000439401	0.000439401	94	no hit
ss715579534	-0.000439145	0.000439145	95	Glyma.01G004800	Glyma.01G004800.9 dsid=glyma.Wm82.gnm4.ann1.Glyma.01G004800.9 pacid=41114733 polypeptide=Glyma.01G004800.9.p locus=Glyma.01G004800 ID=Glyma.01G004800.9.Wm82.a4.v1 annot-version=Wm82.a4.v1	Glycine max	100	121	2.78×10-58	1
ss715579367	-0.000438908	0.000438908	96	no hit
ss715579763	-0.000438669	0.000438669	97	no hit
ss715579751	-0.000438664	0.000438664	98	no hit
ss715579605	-0.000438141	0.000438141	99	no hit
ss715579803	-0.000437683	0.000437683	100	no hit
ss715579447	-0.000437364	0.000437364	101	no hit
ss715579635	-0.000436036	0.000436036	102	no hit
ss715579485	-0.000434809	0.000434809	103	no hit
ss715579593	-0.000434456	0.000434456	104	no hit
ss715579198	0.000432259	0.000432259	105	no hit
ss715580543	-0.000431799	0.000431799	106	no hit
ss715580344	0.00043113	0.00043113	107	Glyma.01G197600	Glyma.01G197600.2 dsid=glyma.Wm82.gnm4.ann1.Glyma.01G197600.2 pacid=41114889 polypeptide=Glyma.01G197600.2.p locus=Glyma.01G197600 ID=Glyma.01G197600.2.Wm82.a4.v1 annot-version=Wm82.a4.v1	Glycine max	100	121	2.78×10-58	1
ss715580709	-0.000431065	0.000431065	108	no hit
ss715579127	-0.000430561	0.000430561	109	Glyma.01G034300	Glyma.01G034300.1 dsid=glyma.Wm82.gnm4.ann1.Glyma.01G034300.1 pacid=41115630 polypeptide=Glyma.01G034300.1.p locus=Glyma.01G034300 ID=Glyma.01G034300.1.Wm82.a4.v1 annot-version=Wm82.a4.v1	Glycine max	62	75	1.04×10-32	1
ss715578517	-0.000430118	0.000430118	110	no hit
ss715584044	-0.000429826	0.000429826	111	no hit
ss715580402	-0.000429593	0.000429593	112	no hit
ss715579853	0.000428898	0.000428898	113	no hit
ss715581593	0.000428889	0.000428889	114	Glyma.02G027800	Glyma.02G027800.1 dsid=glyma.Wm82.gnm4.ann1.Glyma.02G027800.1 pacid=41096761 polypeptide=Glyma.02G027800.1.p locus=Glyma.02G027800 ID=Glyma.02G027800.1.Wm82.a4.v1 annot-version=Wm82.a4.v1	Glycine max	100	121	2.78×10-58	1
ss715580725	-0.000428595	0.000428595	115	no hit
ss715579043	-0.000426755	0.000426755	116	no hit
ss715583842	-0.000425635	0.000425635	117	no hit
ss715580429	-0.00042504	0.00042504	118	Glyma.11G033200	Glyma.11G033200.4 dsid=glyma.Wm82.gnm4.ann1.Glyma.11G033200.4 pacid=41128268 polypeptide=Glyma.11G033200.4.p locus=Glyma.11G033200 ID=Glyma.11G033200.4.Wm82.a4.v1 annot-version=Wm82.a4.v1	Glycine max	26	32	8.31×10-9	1
ss715580716	-0.000424756	0.000424756	119	Glyma.01G244200	Glyma.01G244200.2 dsid=glyma.Wm82.gnm4.ann1.Glyma.01G244200.2 pacid=41117123 polypeptide=Glyma.01G244200.2.p locus=Glyma.01G244200 ID=Glyma.01G244200.2.Wm82.a4.v1 annot-version=Wm82.a4.v1	Glycine max	100	121	2.78×10-58	1
ss715580094	-0.000422444	0.000422444	120	no hit
ss715579787	-0.000422385	0.000422385	121	no hit
ss715579582	-0.000422378	0.000422378	122	Glyma.01G142000	Glyma.01G142000.1 dsid=glyma.Wm82.gnm4.ann1.Glyma.01G142000.1 pacid=41114194 polypeptide=Glyma.01G142000.1.p locus=Glyma.01G142000 ID=Glyma.01G142000.1.Wm82.a4.v1 annot-version=Wm82.a4.v1	Glycine max	100	121	2.78×10-58	1
ss715580289	-0.000422367	0.000422367	123	no hit
ss715580081	-0.000422347	0.000422347	124	no hit
ss715579492	-0.000422194	0.000422194	125	no hit
ss715579328	-0.000422094	0.000422094	126	no hit
ss715579494	-0.000422051	0.000422051	127	no hit
ss715579384	-0.000421942	0.000421942	128	Glyma.15G162900	Glyma.15G162900.3 dsid=glyma.Wm82.gnm4.ann1.Glyma.15G162900.3 pacid=41121490 polypeptide=Glyma.15G162900.3.p locus=Glyma.15G162900 ID=Glyma.15G162900.3.Wm82.a4.v1 annot-version=Wm82.a4.v1	Glycine max	82	66	1.04×10-27	0.89
ss715584063	-0.000421791	0.000421791	129	Glyma.02G008900	Glyma.02G008900.1 dsid=glyma.Wm82.gnm4.ann1.Glyma.02G008900.1 pacid=41094168 polypeptide=Glyma.02G008900.1.p locus=Glyma.02G008900 ID=Glyma.02G008900.1.Wm82.a4.v1 annot-version=Wm82.a4.v1	Glycine max	100	121	2.78×10-58	1
ss715579817	-0.000421702	0.000421702	130	no hit
ss715581662	-0.000421439	0.000421439	131	no hit
ss715579806	-0.000421415	0.000421415	132	no hit
ss715579357	0.000421376	0.000421376	133	Glyma.01G038400	Glyma.01G038400.1 dsid=glyma.Wm82.gnm4.ann1.Glyma.01G038400.1 pacid=41114210 polypeptide=Glyma.01G038400.1.p locus=Glyma.01G038400 ID=Glyma.01G038400.1.Wm82.a4.v1 annot-version=Wm82.a4.v1	Glycine max	74	89	1.71×10-40	1
ss715579304	-0.000421167	0.000421167	134	no hit
ss715579597	-0.00042101	0.00042101	135	no hit
ss715579130	-0.000420636	0.000420636	136	no hit
ss715581169	-0.000420446	0.000420446	137	no hit
ss715579486	-0.000419236	0.000419236	138	no hit
ss715580501	-0.000418822	0.000418822	139	Glyma.01G219300	Glyma.01G219300.1 dsid=glyma.Wm82.gnm4.ann1.Glyma.01G219300.1 pacid=41115817 polypeptide=Glyma.01G219300.1.p locus=Glyma.01G219300 ID=Glyma.01G219300.1.Wm82.a4.v1 annot-version=Wm82.a4.v1	Glycine max	90	109	1.30×10-51	1
ss715579670	-0.000418799	0.000418799	140	no hit
ss715579216	-0.000418678	0.000418678	141	no hit
ss715579389	-0.000418239	0.000418239	142	Glyma.01G123000	Glyma.01G123000.1 dsid=glyma.Wm82.gnm4.ann1.Glyma.01G123000.1 pacid=41115259 polypeptide=Glyma.01G123000.1.p locus=Glyma.01G123000 ID=Glyma.01G123000.1.Wm82.a4.v1 annot-version=Wm82.a4.v1	Glycine max	57	69	2.24×10-29	1
ss715579380	-0.000418158	0.000418158	143	Glyma.19G105000	Glyma.19G105000.1 dsid=glyma.Wm82.gnm4.ann1.Glyma.19G105000.1 pacid=41161592 polypeptide=Glyma.19G105000.1.p locus=Glyma.19G105000 ID=Glyma.19G105000.1.Wm82.a4.v1 annot-version=Wm82.a4.v1	Glycine max	98	104	7.85×10-49	0.958
ss715579374	-0.000417787	0.000417787	144	no hit
ss715580417	-0.00041772	0.00041772	145	no hit
ss715580409	-0.000417604	0.000417604	146	Glyma.01G204600	Glyma.01G204600.1 dsid=glyma.Wm82.gnm4.ann1.Glyma.01G204600.1 pacid=41114442 polypeptide=Glyma.01G204600.1.p locus=Glyma.01G204600 ID=Glyma.01G204600.1.Wm82.a4.v1 annot-version=Wm82.a4.v1	Glycine max	42	51	2.28×10-19	1
ss715579613	-0.000416473	0.000416473	147	no hit
ss715579604	-0.000416325	0.000416325	148	no hit
ss715579417	-0.000416074	0.000416074	149	no hit
ss715579307	-0.000416	0.000416	150	no hit
ss715579518	-0.000415682	0.000415682	151	Glyma.01G135200	Glyma.01G135200.1 dsid=glyma.Wm82.gnm4.ann1.Glyma.01G135200.1 pacid=41117369 polypeptide=Glyma.01G135200.1.p locus=Glyma.01G135200 ID=Glyma.01G135200.1.Wm82.a4.v1 annot-version=Wm82.a4.v1	Glycine max	100	121	2.78×10-58	1
ss715580784	-0.000414154	0.000414154	152	no hit
ss715579653	-0.000414087	0.000414087	153	no hit
ss715579425	-0.000414006	0.000414006	154	no hit
ss715578782	-0.00041345	0.00041345	155	no hit
ss715580789	-0.000412707	0.000412707	156	no hit
ss715580601	-0.000412698	0.000412698	157	Glyma.01G227700	Glyma.01G227700.2 dsid=glyma.Wm82.gnm4.ann1.Glyma.01G227700.2 pacid=41114589 polypeptide=Glyma.01G227700.2.p locus=Glyma.01G227700 ID=Glyma.01G227700.2.Wm82.a4.v1 annot-version=Wm82.a4.v1	Glycine max	81	98	1.70×10-45	1
ss715579528	-0.00041264	0.00041264	158	Glyma.01G136300	Glyma.01G136300.3 dsid=glyma.Wm82.gnm4.ann1.Glyma.01G136300.3 pacid=41117481 polypeptide=Glyma.01G136300.3.p locus=Glyma.01G136300 ID=Glyma.01G136300.3.Wm82.a4.v1 annot-version=Wm82.a4.v1	Glycine max	100	121	2.78×10-58	1
ss715579541	-0.000412471	0.000412471	159	no hit
ss715578552	-0.000412019	0.000412019	160	no hit
ss715579067	-0.000411967	0.000411967	161	no hit
ss715579865	-0.000411949	0.000411949	162	no hit
ss715581446	-0.000411906	0.000411906	163	no hit
ss715578411	-0.000411894	0.000411894	164	no hit
ss715579211	-0.000411782	0.000411782	165	no hit
ss715580422	-0.000411745	0.000411745	166	Glyma.01G206600	Glyma.01G206600.1 dsid=glyma.Wm82.gnm4.ann1.Glyma.01G206600.1 pacid=41116992 polypeptide=Glyma.01G206600.1.p locus=Glyma.01G206600 ID=Glyma.01G206600.1.Wm82.a4.v1 annot-version=Wm82.a4.v1	Glycine max	100	121	2.78×10-58	1
ss715578547	-0.00041172	0.00041172	167	Glyma.01G015700	Glyma.01G015700.14 dsid=glyma.Wm82.gnm4.ann1.Glyma.01G015700.14 pacid=41116348 polypeptide=Glyma.01G015700.14.p locus=Glyma.01G015700 ID=Glyma.01G015700.14.Wm82.a4.v1 annot-version=Wm82.a4.v1	Glycine max	53	64	1.35×10-26	1
ss715581483	-0.000411714	0.000411714	168	Glyma.02G023700	Glyma.02G023700.1 dsid=glyma.Wm82.gnm4.ann1.Glyma.02G023700.1 pacid=41095474 polypeptide=Glyma.02G023700.1.p locus=Glyma.02G023700 ID=Glyma.02G023700.1.Wm82.a4.v1 annot-version=Wm82.a4.v1	Glycine max	100	121	2.78×10-58	1
ss715581440	-0.000411677	0.000411677	169	no hit
ss715578538	-0.000411655	0.000411655	170	no hit
ss715578699	-0.000411628	0.000411628	171	no hit
ss715578571	-0.000411606	0.000411606	172	no hit
ss715578550	-0.000411594	0.000411594	173	Glyma.01G015800	Glyma.01G015800.1 dsid=glyma.Wm82.gnm4.ann1.Glyma.01G015800.1 pacid=41115403 polypeptide=Glyma.01G015800.1.p locus=Glyma.01G015800 ID=Glyma.01G015800.1.Wm82.a4.v1 annot-version=Wm82.a4.v1	Glycine max	100	121	2.78×10-58	1
ss715578554	-0.000411578	0.000411578	174	Glyma.01G016100	Glyma.01G016100.1 dsid=glyma.Wm82.gnm4.ann1.Glyma.01G016100.1 pacid=41115210 polypeptide=Glyma.01G016100.1.p locus=Glyma.01G016100 ID=Glyma.01G016100.1.Wm82.a4.v1 annot-version=Wm82.a4.v1	Glycine max	100	121	2.78×10-58	1
ss715578568	-0.000411557	0.000411557	175	Glyma.01G016700	Glyma.01G016700.1 dsid=glyma.Wm82.gnm4.ann1.Glyma.01G016700.1 pacid=41115381 polypeptide=Glyma.01G016700.1.p locus=Glyma.01G016700 ID=Glyma.01G016700.1.Wm82.a4.v1 annot-version=Wm82.a4.v1	Glycine max	100	121	2.78×10-58	1
ss715579695	-0.000411514	0.000411514	176	Glyma.01G146600	Glyma.01G146600.3 dsid=glyma.Wm82.gnm4.ann1.Glyma.01G146600.3 pacid=41115067 polypeptide=Glyma.01G146600.3.p locus=Glyma.01G146600 ID=Glyma.01G146600.3.Wm82.a4.v1 annot-version=Wm82.a4.v1	Glycine max	73	88	6.15×10-40	1
ss715580554	-0.000411478	0.000411478	177	Glyma.01G224000	Glyma.01G224000.2 dsid=glyma.Wm82.gnm4.ann1.Glyma.01G224000.2 pacid=41117307 polypeptide=Glyma.01G224000.2.p locus=Glyma.01G224000 ID=Glyma.01G224000.2.Wm82.a4.v1 annot-version=Wm82.a4.v1	Glycine max	100	121	2.78×10-58	1
ss715580583	-0.000411435	0.000411435	178	no hit
ss715584293	-0.000411406	0.000411406	179	no hit
ss715579805	-0.00041138	0.00041138	180	no hit
ss715580611	-0.000411373	0.000411373	181	Glyma.01G229500	Glyma.01G229500.4 dsid=glyma.Wm82.gnm4.ann1.Glyma.01G229500.4 pacid=41116971 polypeptide=Glyma.01G229500.4.p locus=Glyma.01G229500 ID=Glyma.01G229500.4.Wm82.a4.v1 annot-version=Wm82.a4.v1	Glycine max	100	121	2.78×10-58	1
ss715580905	-0.000411351	0.000411351	182	no hit
ss715579543	-0.000411303	0.000411303	183	no hit
ss715584262	-0.000411248	0.000411248	184	no hit
ss715580947	-0.000411231	0.000411231	185	no hit
ss715578640	-0.000411212	0.000411212	186	no hit
ss715581297	-0.000411182	0.000411182	187	no hit
ss715578476	-0.000411165	0.000411165	188	Glyma.01G013800	Glyma.01G013800.2 dsid=glyma.Wm82.gnm4.ann1.Glyma.01G013800.2 pacid=41116118 polypeptide=Glyma.01G013800.2.p locus=Glyma.01G013800 ID=Glyma.01G013800.2.Wm82.a4.v1 annot-version=Wm82.a4.v1	Glycine max	100	121	2.78×10-58	1
ss715578543	-0.000411152	0.000411152	189	no hit
ss715578563	-0.00041115	0.00041115	190	Glyma.01G016500	Glyma.01G016500.5 dsid=glyma.Wm82.gnm4.ann1.Glyma.01G016500.5 pacid=41114670 polypeptide=Glyma.01G016500.5.p locus=Glyma.01G016500 ID=Glyma.01G016500.5.Wm82.a4.v1 annot-version=Wm82.a4.v1	Glycine max	84	102	1.02×10-47	1
ss715583013	-0.00041115	0.00041115	191	Glyma.02G004100	Glyma.02G004100.1 dsid=glyma.Wm82.gnm4.ann1.Glyma.02G004100.1 pacid=41098176 polypeptide=Glyma.02G004100.1.p locus=Glyma.02G004100 ID=Glyma.02G004100.1.Wm82.a4.v1 annot-version=Wm82.a4.v1	Glycine max	38	46	1.37×10-16	1
ss715581682	-0.00041115	0.00041115	192	Glyma.01G035600	Glyma.01G035600.1 dsid=glyma.Wm82.gnm4.ann1.Glyma.01G035600.1 pacid=41116202 polypeptide=Glyma.01G035600.1.p locus=Glyma.01G035600 ID=Glyma.01G035600.1.Wm82.a4.v1 annot-version=Wm82.a4.v1	Glycine max	60	44	1.77×10-15	0.866
ss715578556	-0.000411147	0.000411147	193	no hit
ss715579740	-0.000411137	0.000411137	194	no hit
ss715579857	-0.000411133	0.000411133	195	no hit
ss715579871	-0.000411133	0.000411133	196	no hit
ss715580414	-0.000411129	0.000411129	197	no hit
ss715580171	-0.000411127	0.000411127	198	Glyma.01G182600	Glyma.01G182600.1 dsid=glyma.Wm82.gnm4.ann1.Glyma.01G182600.1 pacid=41115632 polypeptide=Glyma.01G182600.1.p locus=Glyma.01G182600 ID=Glyma.01G182600.1.Wm82.a4.v1 annot-version=Wm82.a4.v1	Glycine max	48	58	2.92×10-23	1
ss715580579	-0.000411127	0.000411127	199	no hit
ss715580450	-0.000411126	0.000411126	200	Glyma.01G213500	Glyma.01G213500.1 dsid=glyma.Wm82.gnm4.ann1.Glyma.01G213500.1 pacid=41116990 polypeptide=Glyma.01G213500.1.p locus=Glyma.01G213500 ID=Glyma.01G213500.1.Wm82.a4.v1 annot-version=Wm82.a4.v1	Glycine max	90	109	1.30×10-51	1
ss715580403	-0.000411122	0.000411122	201	no hit
ss715579959	-0.000411119	0.000411119	202	Glyma.01G164500	Glyma.01G164500.2 dsid=glyma.Wm82.gnm4.ann1.Glyma.01G164500.2 pacid=41115293 polypeptide=Glyma.01G164500.2.p locus=Glyma.01G164500 ID=Glyma.01G164500.2.Wm82.a4.v1 annot-version=Wm82.a4.v1	Glycine max	86	104	7.85×10-49	1
ss715580448	-0.000411118	0.000411118	203	Glyma.01G213100	Glyma.01G213100.2 dsid=glyma.Wm82.gnm4.ann1.Glyma.01G213100.2 pacid=41116828 polypeptide=Glyma.01G213100.2.p locus=Glyma.01G213100 ID=Glyma.01G213100.2.Wm82.a4.v1 annot-version=Wm82.a4.v1	Glycine max	29	35	1.79×10-10	1
ss715579018	-0.000411117	0.000411117	204	no hit
ss715579467	-0.000411116	0.000411116	205	no hit
ss715579368	-0.000411114	0.000411114	206	Glyma.01G038500	Glyma.01G038500.1 dsid=glyma.Wm82.gnm4.ann1.Glyma.01G038500.1 pacid=41114847 polypeptide=Glyma.01G038500.1.p locus=Glyma.01G038500 ID=Glyma.01G038500.1.Wm82.a4.v1 annot-version=Wm82.a4.v1	Glycine max	100	121	2.78×10-58	1
ss715578566	-0.000411112	0.000411112	207	no hit
ss715580723	-0.000411112	0.000411112	208	no hit
ss715580676	-0.000411111	0.000411111	209	no hit
ss715580453	-0.000411106	0.000411106	210	Glyma.01G213900	Glyma.01G213900.1 dsid=glyma.Wm82.gnm4.ann1.Glyma.01G213900.1 pacid=41116115 polypeptide=Glyma.01G213900.1.p locus=Glyma.01G213900 ID=Glyma.01G213900.1.Wm82.a4.v1 annot-version=Wm82.a4.v1	Glycine max	100	121	2.78×10-58	1
ss715583646	-0.000411104	0.000411104	211	Glyma.02G005100	Glyma.02G005100.1 dsid=glyma.Wm82.gnm4.ann1.Glyma.02G005100.1 pacid=41097052 polypeptide=Glyma.02G005100.1.p locus=Glyma.02G005100 ID=Glyma.02G005100.1.Wm82.a4.v1 annot-version=Wm82.a4.v1	Glycine max	100	121	2.78×10-58	1
ss715579682	-0.000411102	0.000411102	212	no hit
ss715578695	-0.000411099	0.000411099	213	no hit
ss715579812	-0.000411096	0.000411096	214	no hit
ss715579811	-0.000411094	0.000411094	215	no hit
ss715580584	-0.000411091	0.000411091	216	no hit
ss715579377	-0.000411088	0.000411088	217	no hit
ss715581321	-0.000411086	0.000411086	218	Glyma.02G016600	Glyma.02G016600.1 dsid=glyma.Wm82.gnm4.ann1.Glyma.02G016600.1 pacid=41097772 polypeptide=Glyma.02G016600.1.p locus=Glyma.02G016600 ID=Glyma.02G016600.1.Wm82.a4.v1 annot-version=Wm82.a4.v1	Glycine max	100	121	2.78×10-58	1
ss715579480	-0.000411076	0.000411076	219	no hit
ss715579772	-0.000411076	0.000411076	220	no hit
ss715580586	-0.000411074	0.000411074	221	no hit
ss715578745	-0.000411065	0.000411065	222	no hit
ss715579072	-0.000411065	0.000411065	223	no hit
ss715579125	-0.00041106	0.00041106	224	no hit
ss715584260	-0.00041106	0.00041106	225	no hit
ss715581133	-0.00041106	0.00041106	226	no hit
ss715581237	-0.000411058	0.000411058	227	Glyma.02G015700	Glyma.02G015700.1 dsid=glyma.Wm82.gnm4.ann1.Glyma.02G015700.1 pacid=41097690 polypeptide=Glyma.02G015700.1.p locus=Glyma.02G015700 ID=Glyma.02G015700.1.Wm82.a4.v1 annot-version=Wm82.a4.v1	Glycine max	45	51	2.28×10-19	0.981
ss715581316	-0.000411058	0.000411058	228	no hit
ss715578938	-0.000411055	0.000411055	229	no hit
ss715580443	-0.000411051	0.000411051	230	no hit
ss715580580	-0.000411051	0.000411051	231	Glyma.01G226000	Glyma.01G226000.5 dsid=glyma.Wm82.gnm4.ann1.Glyma.01G226000.5 pacid=41117559 polypeptide=Glyma.01G226000.5.p locus=Glyma.01G226000 ID=Glyma.01G226000.5.Wm82.a4.v1 annot-version=Wm82.a4.v1	Glycine max	100	121	2.78×10-58	1
ss715581471	-0.000411051	0.000411051	232	no hit
ss715580858	-0.000411049	0.000411049	233	no hit
ss715578514	-0.000411049	0.000411049	234	no hit
ss715580933	-0.000411048	0.000411048	235	Glyma.02G011200	Glyma.02G011200.2 dsid=glyma.Wm82.gnm4.ann1.Glyma.02G011200.2 pacid=41097011 polypeptide=Glyma.02G011200.2.p locus=Glyma.02G011200 ID=Glyma.02G011200.2.Wm82.a4.v1 annot-version=Wm82.a4.v1	Glycine max	100	121	2.78×10-58	1
ss715579017	-0.000411046	0.000411046	236	no hit
ss715581066	-0.000411046	0.000411046	237	no hit
ss715579410	-0.000411042	0.000411042	238	Glyma.01G039100	Glyma.01G039100.1 dsid=glyma.Wm82.gnm4.ann1.Glyma.01G039100.1 pacid=41117920 polypeptide=Glyma.01G039100.1.p locus=Glyma.01G039100 ID=Glyma.01G039100.1.Wm82.a4.v1 annot-version=Wm82.a4.v1	Glycine max	98	118	1.29×10-56	1
ss715579845	-0.000411041	0.000411041	239	no hit
ss715580898	-0.00041104	0.00041104	240	no hit
ss715581581	-0.000411035	0.000411035	241	Glyma.02G027000	Glyma.02G027000.1 dsid=glyma.Wm82.gnm4.ann1.Glyma.02G027000.1 pacid=41097309 polypeptide=Glyma.02G027000.1.p locus=Glyma.02G027000 ID=Glyma.02G027000.1.Wm82.a4.v1 annot-version=Wm82.a4.v1	Glycine max	100	121	2.78×10-58	1
ss715581188	-0.000411033	0.000411033	242	Glyma.02G015300	Glyma.02G015300.4 dsid=glyma.Wm82.gnm4.ann1.Glyma.02G015300.4 pacid=41096421 polypeptide=Glyma.02G015300.4.p locus=Glyma.02G015300 ID=Glyma.02G015300.4.Wm82.a4.v1 annot-version=Wm82.a4.v1	Glycine max	100	121	2.78×10-58	1
ss715579178	-0.000411027	0.000411027	243	no hit
ss715580912	-0.000411025	0.000411025	244	no hit
ss715580505	-0.000411022	0.000411022	245	no hit
ss715580599	-0.000411021	0.000411021	246	Glyma.01G227300	Glyma.01G227300.1 dsid=glyma.Wm82.gnm4.ann1.Glyma.01G227300.1 pacid=41116314 polypeptide=Glyma.01G227300.1.p locus=Glyma.01G227300 ID=Glyma.01G227300.1.Wm82.a4.v1 annot-version=Wm82.a4.v1	Glycine max	100	121	2.78×10-58	1
ss715579733	-0.00041102	0.00041102	247	no hit
ss715579825	-0.00041102	0.00041102	248	no hit
ss715579371	-0.000411018	0.000411018	249	Glyma.03G058000	Glyma.03G058000.4 dsid=glyma.Wm82.gnm4.ann1.Glyma.03G058000.4 pacid=41158190 polypeptide=Glyma.03G058000.4.p locus=Glyma.03G058000 ID=Glyma.03G058000.4.Wm82.a4.v1 annot-version=Wm82.a4.v1	Glycine max	42	51	2.28×10-19	1
ss715579128	-0.000411015	0.000411015	250	no hit
ss715579009	-0.000411012	0.000411012	251	no hit
ss715579460	-0.000411012	0.000411012	252	no hit
ss715580244	-0.000411012	0.000411012	253	no hit
ss715579549	-0.000411008	0.000411008	254	no hit
ss715580423	-0.000411004	0.000411004	255	no hit
ss715580864	-0.000411004	0.000411004	256	no hit
ss715579413	-0.000411004	0.000411004	257	no hit
ss715579454	-0.000411001	0.000411001	258	no hit
ss715580084	-0.000411001	0.000411001	259	no hit
ss715579688	-0.000410999	0.000410999	260	no hit
ss715579962	-0.000410999	0.000410999	261	Glyma.01G164700	Glyma.01G164700.1 dsid=glyma.Wm82.gnm4.ann1.Glyma.01G164700.1 pacid=41116154 polypeptide=Glyma.01G164700.1.p locus=Glyma.01G164700 ID=Glyma.01G164700.1.Wm82.a4.v1 annot-version=Wm82.a4.v1	Glycine max	100	121	2.78×10-58	1
ss715580246	-0.000410999	0.000410999	262	no hit
ss715579080	-0.000410995	0.000410995	263	no hit
ss715579764	-0.000410994	0.000410994	264	no hit
ss715579536	-0.000410992	0.000410992	265	no hit
ss715579376	-0.000410992	0.000410992	266	no hit
ss715579731	-0.000410991	0.000410991	267	no hit
ss715579373	-0.000410989	0.000410989	268	no hit
ss715579833	-0.000410989	0.000410989	269	Glyma.03G245200	Glyma.03G245200.1 dsid=glyma.Wm82.gnm4.ann1.Glyma.03G245200.1 pacid=41156243 polypeptide=Glyma.03G245200.1.p locus=Glyma.03G245200 ID=Glyma.03G245200.1.Wm82.a4.v1 annot-version=Wm82.a4.v1	Glycine max	100	112	2.80×10-53	0.975
ss715579427	-0.000410988	0.000410988	270	no hit
ss715579710	-0.000410988	0.000410988	271	no hit
ss715579419	-0.000410987	0.000410987	272	no hit
ss715579623	-0.000410985	0.000410985	273	no hit
ss715579274	-0.000410983	0.000410983	274	Glyma.01G115700	Glyma.01G115700.1 dsid=glyma.Wm82.gnm4.ann1.Glyma.01G115700.1 pacid=41115711 polypeptide=Glyma.01G115700.1.p locus=Glyma.01G115700 ID=Glyma.01G115700.1.Wm82.a4.v1 annot-version=Wm82.a4.v1	Glycine max	100	121	2.78×10-58	1
ss715579535	-0.000410981	0.000410981	275	no hit
ss715578545	-0.00041098	0.00041098	276	no hit
ss715580569	-0.000410976	0.000410976	277	no hit
ss715579444	-0.000410975	0.000410975	278	no hit
ss715578781	-0.000410975	0.000410975	279	no hit
ss715579379	-0.000410974	0.000410974	280	no hit
ss715579828	-0.000410971	0.000410971	281	no hit
ss715579596	-0.00041097	0.00041097	282	Glyma.06G085700	Glyma.06G085700.1 dsid=glyma.Wm82.gnm4.ann1.Glyma.06G085700.1 pacid=41152867 polypeptide=Glyma.06G085700.1.p locus=Glyma.06G085700 ID=Glyma.06G085700.1.Wm82.a4.v1 annot-version=Wm82.a4.v1	Glycine max	100	88	6.15×10-40	0.909
ss715580098	-0.00041097	0.00041097	283	no hit
ss715580574	-0.00041097	0.00041097	284	no hit
ss715579326	-0.000410968	0.000410968	285	no hit
ss715579679	-0.000410968	0.000410968	286	no hit
ss715578855	-0.000410966	0.000410966	287	no hit
ss715580406	-0.000410963	0.000410963	288	Glyma.11G038500	Glyma.11G038500.2 dsid=glyma.Wm82.gnm4.ann1.Glyma.11G038500.2 pacid=41129675 polypeptide=Glyma.11G038500.2.p locus=Glyma.11G038500 ID=Glyma.11G038500.2.Wm82.a4.v1 annot-version=Wm82.a4.v1	Glycine max	100	91	1.32×10-41	0.917
ss715579212	-0.000410961	0.000410961	289	no hit
ss715578726	-0.00041096	0.00041096	290	Glyma.01G001200	Glyma.01G001200.2 dsid=glyma.Wm82.gnm4.ann1.Glyma.01G001200.2 pacid=41117992 polypeptide=Glyma.01G001200.2.p locus=Glyma.01G001200 ID=Glyma.01G001200.2.Wm82.a4.v1 annot-version=Wm82.a4.v1	Glycine max	100	121	2.78×10-58	1
ss715580351	-0.000410957	0.000410957	291	no hit
ss715579184	-0.000410956	0.000410956	292	Glyma.01G112500	Glyma.01G112500.8 dsid=glyma.Wm82.gnm4.ann1.Glyma.01G112500.8 pacid=41114929 polypeptide=Glyma.01G112500.8.p locus=Glyma.01G112500 ID=Glyma.01G112500.8.Wm82.a4.v1 annot-version=Wm82.a4.v1	Glycine max	100	121	2.78×10-58	1
ss715578473	-0.000410955	0.000410955	293	no hit
ss715579336	-0.000410954	0.000410954	294	no hit
ss715579116	-0.000410953	0.000410953	295	Glyma.01G107951	Glyma.01G107951.1 dsid=glyma.Wm82.gnm4.ann1.Glyma.01G107951.1 pacid=41114217 polypeptide=Glyma.01G107951.1.p locus=Glyma.01G107951 ID=Glyma.01G107951.1.Wm82.a4.v1 annot-version=Wm82.a4.v1	Glycine max	75	91	1.32×10-41	1
ss715580347	-0.000410953	0.000410953	296	no hit
ss715579640	-0.000410951	0.000410951	297	no hit
ss715581791	-0.000410951	0.000410951	298	Glyma.02G033400	Glyma.02G033400.1 dsid=glyma.Wm82.gnm4.ann1.Glyma.02G033400.1 pacid=41094498 polypeptide=Glyma.02G033400.1.p locus=Glyma.02G033400 ID=Glyma.02G033400.1.Wm82.a4.v1 annot-version=Wm82.a4.v1	Glycine max	100	121	2.78×10-58	1
ss715578853	-0.00041095	0.00041095	299	no hit
ss715579291	-0.000410948	0.000410948	300	no hit
ss715578981	-0.000410948	0.000410948	301	no hit
ss715579868	-0.000410948	0.000410948	302	no hit
ss715579520	-0.000410947	0.000410947	303	no hit
ss715580675	-0.000410946	0.000410946	304	Glyma.01G235600	Glyma.01G235600.1 dsid=glyma.Wm82.gnm4.ann1.Glyma.01G235600.1 pacid=41117600 polypeptide=Glyma.01G235600.1.p locus=Glyma.01G235600 ID=Glyma.01G235600.1.Wm82.a4.v1 annot-version=Wm82.a4.v1	Glycine max	44	53	1.76×10-20	1
ss715578665	-0.000410942	0.000410942	305	no hit
ss715579030	-0.000410942	0.000410942	306	no hit
ss715579182	-0.000410941	0.000410941	307	no hit
ss715583823	-0.000410936	0.000410936	308	Glyma.02G006700	Glyma.02G006700.2 dsid=glyma.Wm82.gnm4.ann1.Glyma.02G006700.2 pacid=41098420 polypeptide=Glyma.02G006700.2.p locus=Glyma.02G006700 ID=Glyma.02G006700.2.Wm82.a4.v1 annot-version=Wm82.a4.v1	Glycine max	28	34	6.42×10-10	1
ss715579517	-0.000410934	0.000410934	309	no hit
ss715580571	-0.000410932	0.000410932	310	no hit
ss715580131	-0.00041093	0.00041093	311	no hit
ss715580666	-0.000410928	0.000410928	312	Glyma.01G235100	Glyma.01G235100.1 dsid=glyma.Wm82.gnm4.ann1.Glyma.01G235100.1 pacid=41116396 polypeptide=Glyma.01G235100.1.p locus=Glyma.01G235100 ID=Glyma.01G235100.1.Wm82.a4.v1 annot-version=Wm82.a4.v1	Glycine max	100	121	2.78×10-58	1
ss715579463	-0.000410927	0.000410927	313	no hit
ss715580436	-0.000410927	0.000410927	314	no hit
ss715581317	-0.000410926	0.000410926	315	Glyma.02G016500	Glyma.02G016500.1 dsid=glyma.Wm82.gnm4.ann1.Glyma.02G016500.1 pacid=41094996 polypeptide=Glyma.02G016500.1.p locus=Glyma.02G016500 ID=Glyma.02G016500.1.Wm82.a4.v1 annot-version=Wm82.a4.v1	Glycine max	100	121	2.78×10-58	1
ss715579333	-0.000410923	0.000410923	316	Glyma.01G038100	Glyma.01G038100.1 dsid=glyma.Wm82.gnm4.ann1.Glyma.01G038100.1 pacid=41117178 polypeptide=Glyma.01G038100.1.p locus=Glyma.01G038100 ID=Glyma.01G038100.1.Wm82.a4.v1 annot-version=Wm82.a4.v1	Glycine max	100	121	2.78×10-58	1
ss715580401	-0.000410923	0.000410923	317	no hit
ss715581571	-0.000410921	0.000410921	318	Glyma.02G002000	Glyma.02G002000.2 dsid=glyma.Wm82.gnm4.ann1.Glyma.02G002000.2 pacid=41095459 polypeptide=Glyma.02G002000.2.p locus=Glyma.02G002000 ID=Glyma.02G002000.2.Wm82.a4.v1 annot-version=Wm82.a4.v1	Glycine max	100	121	2.78×10-58	1
ss715580671	-0.00041092	0.00041092	319	no hit
ss715579320	-0.000410918	0.000410918	320	no hit
ss715579560	-0.000410918	0.000410918	321	no hit
ss715579241	-0.000410917	0.000410917	322	no hit
ss715578893	-0.000410916	0.000410916	323	no hit
ss715579786	-0.000410916	0.000410916	324	Glyma.01G152600	Glyma.01G152600.1 dsid=glyma.Wm82.gnm4.ann1.Glyma.01G152600.1 pacid=41115104 polypeptide=Glyma.01G152600.1.p locus=Glyma.01G152600 ID=Glyma.01G152600.1.Wm82.a4.v1 annot-version=Wm82.a4.v1	Glycine max	51	62	1.75×10-25	1
ss715579329	-0.000410915	0.000410915	325	no hit
ss715580454	-0.000410915	0.000410915	326	no hit
ss715578900	-0.000410914	0.000410914	327	no hit
ss715639111	-0.000410914	0.000410914	328	no hit
ss715581582	-0.000410913	0.000410913	329	no hit
ss715578804	-0.000410912	0.000410912	330	no hit
ss715579203	-0.00041091	0.00041091	331	no hit
ss715579232	-0.000410909	0.000410909	332	no hit
ss715578533	-0.000410908	0.000410908	333	no hit
ss715579497	-0.000410908	0.000410908	334	no hit
ss715580772	-0.000410907	0.000410907	335	no hit
ss715580596	-0.000410906	0.000410906	336	Glyma.01G227200	Glyma.01G227200.2 dsid=glyma.Wm82.gnm4.ann1.Glyma.01G227200.2 pacid=41116181 polypeptide=Glyma.01G227200.2.p locus=Glyma.01G227200 ID=Glyma.01G227200.2.Wm82.a4.v1 annot-version=Wm82.a4.v1	Glycine max	100	121	2.78×10-58	1
ss715578528	-0.000410905	0.000410905	337	no hit
ss715579204	-0.000410905	0.000410905	338	no hit
ss715580622	-0.000410905	0.000410905	339	no hit
ss715578861	-0.000410904	0.000410904	340	no hit
ss715579614	-0.000410903	0.000410903	341	no hit
ss715578931	-0.000410902	0.000410902	342	no hit
ss715579369	-0.000410902	0.000410902	343	Glyma.01G121400	Glyma.01G121400.1 dsid=glyma.Wm82.gnm4.ann1.Glyma.01G121400.1 pacid=41117279 polypeptide=Glyma.01G121400.1.p locus=Glyma.01G121400 ID=Glyma.01G121400.1.Wm82.a4.v1 annot-version=Wm82.a4.v1	Glycine max	68	82	1.33×10-36	1
ss715580563	-0.000410901	0.000410901	344	no hit
ss715582577	-0.0004109	0.0004109	345	Glyma.02G003700	Glyma.02G003700.1 dsid=glyma.Wm82.gnm4.ann1.Glyma.02G003700.1 pacid=41097084 polypeptide=Glyma.02G003700.1.p locus=Glyma.02G003700 ID=Glyma.02G003700.1.Wm82.a4.v1 annot-version=Wm82.a4.v1	Glycine max	83	101	3.65×10-47	1
ss715578492	-0.000410899	0.000410899	346	no hit
ss715579533	-0.000410897	0.000410897	347	no hit
ss715583655	-0.000410897	0.000410897	348	no hit
ss715579180	-0.000410895	0.000410895	349	no hit
ss715579294	-0.000410894	0.000410894	350	Glyma.01G037100	Glyma.01G037100.1 dsid=glyma.Wm82.gnm4.ann1.Glyma.01G037100.1 pacid=41115690 polypeptide=Glyma.01G037100.1.p locus=Glyma.01G037100 ID=Glyma.01G037100.1.Wm82.a4.v1 annot-version=Wm82.a4.v1	Glycine max	98	118	1.29×10-56	1
ss715581466	-0.000410894	0.000410894	351	Glyma.02G001700	Glyma.02G001700.1 dsid=glyma.Wm82.gnm4.ann1.Glyma.02G001700.1 pacid=41098005 polypeptide=Glyma.02G001700.1.p locus=Glyma.02G001700 ID=Glyma.02G001700.1.Wm82.a4.v1 annot-version=Wm82.a4.v1	Glycine max	100	121	2.78×10-58	1
ss715579325	-0.00041089	0.00041089	352	no hit
ss715579299	-0.000410889	0.000410889	353	Glyma.01G037200	Glyma.01G037200.1 dsid=glyma.Wm82.gnm4.ann1.Glyma.01G037200.1 pacid=41117945 polypeptide=Glyma.01G037200.1.p locus=Glyma.01G037200 ID=Glyma.01G037200.1.Wm82.a4.v1 annot-version=Wm82.a4.v1	Glycine max	100	121	2.78×10-58	1
ss715580507	-0.000410888	0.000410888	354	Glyma.01G219800	Glyma.01G219800.2 dsid=glyma.Wm82.gnm4.ann1.Glyma.01G219800.2 pacid=41114502 polypeptide=Glyma.01G219800.2.p locus=Glyma.01G219800 ID=Glyma.01G219800.2.Wm82.a4.v1 annot-version=Wm82.a4.v1	Glycine max	100	121	2.78×10-58	1
ss715580572	-0.000410887	0.000410887	355	no hit
ss715579176	-0.000410885	0.000410885	356	no hit
ss715579449	-0.000410882	0.000410882	357	no hit
ss715579813	-0.000410878	0.000410878	358	no hit
ss715580787	-0.000410877	0.000410877	359	no hit
ss715578667	-0.000410876	0.000410876	360	no hit
ss715580411	-0.000410876	0.000410876	361	Glyma.01G204800	Glyma.01G204800.1 dsid=glyma.Wm82.gnm4.ann1.Glyma.01G204800.1 pacid=41114948 polypeptide=Glyma.01G204800.1.p locus=Glyma.01G204800 ID=Glyma.01G204800.1.Wm82.a4.v1 annot-version=Wm82.a4.v1	Glycine max	28	34	6.42×10-10	1
ss715580493	-0.000410873	0.000410873	362	no hit
ss715580473	-0.000410872	0.000410872	363	Glyma.01G217100	Glyma.01G217100.3 dsid=glyma.Wm82.gnm4.ann1.Glyma.01G217100.3 pacid=41114706 polypeptide=Glyma.01G217100.3.p locus=Glyma.01G217100 ID=Glyma.01G217100.3.Wm82.a4.v1 annot-version=Wm82.a4.v1	Glycine max	51	62	1.75×10-25	1
ss715579471	-0.000410871	0.000410871	364	no hit
ss715580037	-0.000410871	0.000410871	365	no hit
ss715579123	-0.00041087	0.00041087	366	Glyma.01G034200	Glyma.01G034200.2 dsid=glyma.Wm82.gnm4.ann1.Glyma.01G034200.2 pacid=41116940 polypeptide=Glyma.01G034200.2.p locus=Glyma.01G034200 ID=Glyma.01G034200.2.Wm82.a4.v1 annot-version=Wm82.a4.v1	Glycine max	100	121	2.78×10-58	1
ss715579815	-0.000410867	0.000410867	367	Glyma.01G153400	Glyma.01G153400.1 dsid=glyma.Wm82.gnm4.ann1.Glyma.01G153400.1 pacid=41116153 polypeptide=Glyma.01G153400.1.p locus=Glyma.01G153400 ID=Glyma.01G153400.1.Wm82.a4.v1 annot-version=Wm82.a4.v1	Glycine max	100	121	2.78×10-58	1
ss715580430	-0.000410866	0.000410866	368	Glyma.01G209100	Glyma.01G209100.1 dsid=glyma.Wm82.gnm4.ann1.Glyma.01G209100.1 pacid=41117341 polypeptide=Glyma.01G209100.1.p locus=Glyma.01G209100 ID=Glyma.01G209100.1.Wm82.a4.v1 annot-version=Wm82.a4.v1	Glycine max	100	121	2.78×10-58	1
ss715580481	-0.000410863	0.000410863	369	Glyma.01G217500	Glyma.01G217500.1 dsid=glyma.Wm82.gnm4.ann1.Glyma.01G217500.1 pacid=41114523 polypeptide=Glyma.01G217500.1.p locus=Glyma.01G217500 ID=Glyma.01G217500.1.Wm82.a4.v1 annot-version=Wm82.a4.v1	Glycine max	100	121	2.78×10-58	1
ss715581548	-0.000410862	0.000410862	370	Glyma.02G001800	Glyma.02G001800.1 dsid=glyma.Wm82.gnm4.ann1.Glyma.02G001800.1 pacid=41095998 polypeptide=Glyma.02G001800.1.p locus=Glyma.02G001800 ID=Glyma.02G001800.1.Wm82.a4.v1 annot-version=Wm82.a4.v1	Glycine max	100	121	2.78×10-58	1
ss715579303	-0.000410861	0.000410861	371	no hit
ss715579637	-0.00041086	0.00041086	372	no hit
ss715579644	-0.00041086	0.00041086	373	no hit
ss715579230	-0.000410859	0.000410859	374	no hit
ss715579519	-0.000410859	0.000410859	375	no hit
ss715579330	-0.000410857	0.000410857	376	no hit
ss715580219	-0.000410857	0.000410857	377	Glyma.01G187400	Glyma.01G187400.1 dsid=glyma.Wm82.gnm4.ann1.Glyma.01G187400.1 pacid=41116297 polypeptide=Glyma.01G187400.1.p locus=Glyma.01G187400 ID=Glyma.01G187400.1.Wm82.a4.v1 annot-version=Wm82.a4.v1	Glycine max	57	69	2.24×10-29	1
ss715579308	-0.000410856	0.000410856	378	no hit
ss715579705	-0.000410856	0.000410856	379	no hit
ss715584102	-0.000410851	0.000410851	380	no hit
ss715580824	-0.000410847	0.000410847	381	no hit
ss715580567	-0.000410845	0.000410845	382	no hit
ss715579651	-0.000410837	0.000410837	383	no hit
ss715578519	-0.000410836	0.000410836	384	no hit
ss715579099	-0.000410836	0.000410836	385	Glyma.01G106800	Glyma.01G106800.3 dsid=glyma.Wm82.gnm4.ann1.Glyma.01G106800.3 pacid=41116795 polypeptide=Glyma.01G106800.3.p locus=Glyma.01G106800 ID=Glyma.01G106800.3.Wm82.a4.v1 annot-version=Wm82.a4.v1	Glycine max	100	121	2.78×10-58	1
ss715579404	-0.000410836	0.000410836	386	Glyma.01G124000	Glyma.01G124000.1 dsid=glyma.Wm82.gnm4.ann1.Glyma.01G124000.1 pacid=41116631 polypeptide=Glyma.01G124000.1.p locus=Glyma.01G124000 ID=Glyma.01G124000.1.Wm82.a4.v1 annot-version=Wm82.a4.v1	Glycine max	100	121	2.78×10-58	1
ss715580776	-0.000410834	0.000410834	387	no hit
ss715579456	-0.000410833	0.000410833	388	no hit
ss715579502	-0.00041083	0.00041083	389	no hit
ss715579683	-0.000410828	0.000410828	390	no hit
ss715579841	-0.000410828	0.000410828	391	Glyma.01G155200	Glyma.01G155200.1 dsid=glyma.Wm82.gnm4.ann1.Glyma.01G155200.1 pacid=41117138 polypeptide=Glyma.01G155200.1.p locus=Glyma.01G155200 ID=Glyma.01G155200.1.Wm82.a4.v1 annot-version=Wm82.a4.v1	Glycine max	100	121	2.78×10-58	1
ss715579088	-0.000410822	0.000410822	392	no hit
ss715584228	-0.000410822	0.000410822	393	Glyma.10G010501	Glyma.10G010501.1 dsid=glyma.Wm82.gnm4.ann1.Glyma.10G010501.1 pacid=41105065 polypeptide=Glyma.10G010501.1.p locus=Glyma.10G010501 ID=Glyma.10G010501.1.Wm82.a4.v1 annot-version=Wm82.a4.v1	Glycine max	100	97	6.11×10-45	0.934
ss715579720	-0.000410814	0.000410814	394	Glyma.09G070300	Glyma.09G070300.3 dsid=glyma.Wm82.gnm4.ann1.Glyma.09G070300.3 pacid=41134205 polypeptide=Glyma.09G070300.3.p locus=Glyma.09G070300 ID=Glyma.09G070300.3.Wm82.a4.v1 annot-version=Wm82.a4.v1	Glycine max	75	79	6.20×10-35	0.956
ss715578774	-0.000410813	0.000410813	395	no hit
ss715579603	-0.000410804	0.000410804	396	no hit
ss715579131	-0.000410801	0.000410801	397	Glyma.01G034402	Glyma.01G034402.1 dsid=glyma.Wm82.gnm4.ann1.Glyma.01G034402.1 pacid=41115340 polypeptide=Glyma.01G034402.1.p locus=Glyma.01G034402 ID=Glyma.01G034402.1.Wm82.a4.v1 annot-version=Wm82.a4.v1	Glycine max	100	121	2.78×10-58	1
ss715579276	-0.000410798	0.000410798	398	no hit
ss715579129	-0.000410795	0.000410795	399	no hit
ss715579284	-0.000410792	0.000410792	400	no hit
ss715578648	-0.000410791	0.000410791	401	no hit
ss715580585	-0.000410784	0.000410784	402	no hit
ss715581326	-0.000410783	0.000410783	403	no hit
ss715580717	-0.00041078	0.00041078	404	no hit
ss715578920	-0.000410777	0.000410777	405	no hit
ss715580502	-0.000410774	0.000410774	406	no hit
ss715581725	-0.000410774	0.000410774	407	no hit
ss715579504	-0.000410767	0.000410767	408	no hit
ss715578647	-0.000410765	0.000410765	409	no hit
ss715579572	-0.000410764	0.000410764	410	Glyma.12G116000	Glyma.12G116000.2 dsid=glyma.Wm82.gnm4.ann1.Glyma.12G116000.2 pacid=41102351 polypeptide=Glyma.12G116000.2.p locus=Glyma.12G116000 ID=Glyma.12G116000.2.Wm82.a4.v1 annot-version=Wm82.a4.v1	Glycine max	99	72	4.83×10-31	0.868
ss715579448	-0.000410762	0.000410762	411	no hit
ss715580279	-0.000410759	0.000410759	412	no hit
ss715584009	-0.000410758	0.000410758	413	no hit
ss715579215	-0.000410753	0.000410753	414	no hit
ss715580480	-0.000410749	0.000410749	415	no hit
ss715579051	-0.00041074	0.00041074	416	Glyma.06G099400	Glyma.06G099400.1 dsid=glyma.Wm82.gnm4.ann1.Glyma.06G099400.1 pacid=41152331 polypeptide=Glyma.06G099400.1.p locus=Glyma.06G099400 ID=Glyma.06G099400.1.Wm82.a4.v1 annot-version=Wm82.a4.v1	Glycine max	64	45	4.93×10-16	0.859
ss715580774	-0.000410735	0.000410735	417	no hit
ss715581431	-0.000410731	0.000410731	418	no hit
ss715579225	-0.00041073	0.00041073	419	no hit
ss715580861	-0.000410729	0.000410729	420	no hit
ss715579516	-0.000410725	0.000410725	421	no hit
ss715578788	-0.000410721	0.000410721	422	no hit
ss715578989	-0.000410718	0.000410718	423	no hit
ss715580404	-0.000410714	0.000410714	424	no hit
ss715579830	-0.000410713	0.000410713	425	no hit
ss715580573	-0.000410709	0.000410709	426	no hit
ss715584284	-0.000410703	0.000410703	427	no hit
ss715579420	-0.000410682	0.000410682	428	Glyma.01G125100	Glyma.01G125100.4 dsid=glyma.Wm82.gnm4.ann1.Glyma.01G125100.4 pacid=41117347 polypeptide=Glyma.01G125100.4.p locus=Glyma.01G125100 ID=Glyma.01G125100.4.Wm82.a4.v1 annot-version=Wm82.a4.v1	Glycine max	55	66	1.04×10-27	1
ss715579398	-0.00041068	0.00041068	429	no hit
ss715579392	-0.000410664	0.000410664	430	no hit
ss715581575	-0.000410612	0.000410612	431	Glyma.02G026800	Glyma.02G026800.1 dsid=glyma.Wm82.gnm4.ann1.Glyma.02G026800.1 pacid=41095420 polypeptide=Glyma.02G026800.1.p locus=Glyma.02G026800 ID=Glyma.02G026800.1.Wm82.a4.v1 annot-version=Wm82.a4.v1	Glycine max	100	121	2.78×10-58	1
ss715579054	-0.000410561	0.000410561	432	no hit
ss715578575	-0.000410374	0.000410374	433	Glyma.01G016900	Glyma.01G016900.1 dsid=glyma.Wm82.gnm4.ann1.Glyma.01G016900.1 pacid=41116626 polypeptide=Glyma.01G016900.1.p locus=Glyma.01G016900 ID=Glyma.01G016900.1.Wm82.a4.v1 annot-version=Wm82.a4.v1	Glycine max	100	121	2.78×10-58	1
ss715579768	-0.000410224	0.000410224	434	no hit
ss715580937	-0.000409961	0.000409961	435	no hit
ss715579372	-0.000409771	0.000409771	436	no hit
ss715580445	-0.000409517	0.000409517	437	Glyma.01G212500	Glyma.01G212500.1 dsid=glyma.Wm82.gnm4.ann1.Glyma.01G212500.1 pacid=41117246 polypeptide=Glyma.01G212500.1.p locus=Glyma.01G212500 ID=Glyma.01G212500.1.Wm82.a4.v1 annot-version=Wm82.a4.v1	Glycine max	32	39	1.07×10-12	1
ss715581106	0.00040933	0.00040933	438	no hit
ss715582795	-0.000408438	0.000408438	439	no hit
ss715580452	-0.000408093	0.000408093	440	no hit
ss715580965	-0.000407756	0.000407756	441	Glyma.02G011900	Glyma.02G011900.1 dsid=glyma.Wm82.gnm4.ann1.Glyma.02G011900.1 pacid=41095321 polypeptide=Glyma.02G011900.1.p locus=Glyma.02G011900 ID=Glyma.02G011900.1.Wm82.a4.v1 annot-version=Wm82.a4.v1	Glycine max	100	121	2.78×10-58	1
ss715580048	-0.000407407	0.000407407	442	Glyma.01G170700	Glyma.01G170700.2 dsid=glyma.Wm82.gnm4.ann1.Glyma.01G170700.2 pacid=41117942 polypeptide=Glyma.01G170700.2.p locus=Glyma.01G170700 ID=Glyma.01G170700.2.Wm82.a4.v1 annot-version=Wm82.a4.v1	Glycine max	100	121	2.78×10-58	1
ss715579557	-0.000406667	0.000406667	443	Glyma.01G139666	Glyma.01G139666.1 dsid=glyma.Wm82.gnm4.ann1.Glyma.01G139666.1 pacid=41114446 polypeptide=Glyma.01G139666.1.p locus=Glyma.01G139666 ID=Glyma.01G139666.1.Wm82.a4.v1 annot-version=Wm82.a4.v1	Glycine max	100	121	2.78×10-58	1
ss715579618	-0.000406661	0.000406661	444	Glyma.07G196000	Glyma.07G196000.1 dsid=glyma.Wm82.gnm4.ann1.Glyma.07G196000.1 pacid=41126350 polypeptide=Glyma.07G196000.1.p locus=Glyma.07G196000 ID=Glyma.07G196000.1.Wm82.a4.v1 annot-version=Wm82.a4.v1	Glycine max	100	90	4.76×10-41	0.919
ss715580268	-0.000406305	0.000406305	445	no hit
ss715580222	-0.000404861	0.000404861	446	no hit
ss715579652	-0.000403412	0.000403412	447	Glyma.03G022100	Glyma.03G022100.1 dsid=glyma.Wm82.gnm4.ann1.Glyma.03G022100.1 pacid=41159120 polypeptide=Glyma.03G022100.1.p locus=Glyma.03G022100 ID=Glyma.03G022100.1.Wm82.a4.v1 annot-version=Wm82.a4.v1	Glycine max	98	99	4.72×10-46	0.942
ss715580024	0.000401796	0.000401796	448	no hit
ss715579923	-0.000401219	0.000401219	449	no hit
ss715578851	0.000399035	0.000399035	450	no hit
ss715581729	-0.000398953	0.000398953	451	Glyma.02G032100	Glyma.02G032100.1 dsid=glyma.Wm82.gnm4.ann1.Glyma.02G032100.1 pacid=41095836 polypeptide=Glyma.02G032100.1.p locus=Glyma.02G032100 ID=Glyma.02G032100.1.Wm82.a4.v1 annot-version=Wm82.a4.v1	Glycine max	100	121	2.78×10-58	1
ss715579224	0.000396351	0.000396351	452	no hit
ss715579229	-0.000394909	0.000394909	453	no hit
ss715580387	0.00039149	0.00039149	454	no hit
ss715580964	-0.000391379	0.000391379	455	no hit
ss715579443	-0.000390792	0.000390792	456	no hit
ss715579149	-0.000390555	0.000390555	457	no hit
ss715579394	-0.000390511	0.000390511	458	no hit
ss715580030	-0.000387764	0.000387764	459	Glyma.11G074900	Glyma.11G074900.3 dsid=glyma.Wm82.gnm4.ann1.Glyma.11G074900.3 pacid=41131095 polypeptide=Glyma.11G074900.3.p locus=Glyma.11G074900 ID=Glyma.11G074900.3.Wm82.a4.v1 annot-version=Wm82.a4.v1	Glycine max	35	42	2.29×10-14	1
ss715581438	-0.000386159	0.000386159	460	no hit
ss715580935	-0.000386074	0.000386074	461	no hit
ss715580336	-0.000384398	0.000384398	462	no hit
ss715584277	-0.00038384	0.00038384	463	no hit
ss715578888	-0.000381341	0.000381341	464	no hit
ss715579332	-0.000380276	0.000380276	465	Glyma.01G038100	Glyma.01G038100.1 dsid=glyma.Wm82.gnm4.ann1.Glyma.01G038100.1 pacid=41117178 polypeptide=Glyma.01G038100.1.p locus=Glyma.01G038100 ID=Glyma.01G038100.1.Wm82.a4.v1 annot-version=Wm82.a4.v1	Glycine max	100	121	2.78×10-58	1
ss715580537	-0.000377166	0.000377166	466	Glyma.01G222700	Glyma.01G222700.1 dsid=glyma.Wm82.gnm4.ann1.Glyma.01G222700.1 pacid=41116853 polypeptide=Glyma.01G222700.1.p locus=Glyma.01G222700 ID=Glyma.01G222700.1.Wm82.a4.v1 annot-version=Wm82.a4.v1	Glycine max	100	121	2.78×10-58	1
ss715580788	-0.000377095	0.000377095	467	no hit
ss715579771	-0.000372691	0.000372691	468	Glyma.01G152000	Glyma.01G152000.1 dsid=glyma.Wm82.gnm4.ann1.Glyma.01G152000.1 pacid=41116972 polypeptide=Glyma.01G152000.1.p locus=Glyma.01G152000 ID=Glyma.01G152000.1.Wm82.a4.v1 annot-version=Wm82.a4.v1	Glycine max	100	121	2.78×10-58	1
ss715578823	0.000371391	0.000371391	469	no hit
ss715578482	0.00037116	0.00037116	470	no hit
ss715579152	0.000371129	0.000371129	471	no hit
ss715579987	-0.000369557	0.000369557	472	no hit
ss715580691	0.000369415	0.000369415	473	Glyma.01G239800	Glyma.01G239800.1 dsid=glyma.Wm82.gnm4.ann1.Glyma.01G239800.1 pacid=41117150 polypeptide=Glyma.01G239800.1.p locus=Glyma.01G239800 ID=Glyma.01G239800.1.Wm82.a4.v1 annot-version=Wm82.a4.v1	Glycine max	100	121	2.78×10-58	1
ss715578932	0.000363711	0.000363711	474	no hit
ss715581451	-0.000358721	0.000358721	475	Glyma.02G022200	Glyma.02G022200.1 dsid=glyma.Wm82.gnm4.ann1.Glyma.02G022200.1 pacid=41097626 polypeptide=Glyma.02G022200.1.p locus=Glyma.02G022200 ID=Glyma.02G022200.1.Wm82.a4.v1 annot-version=Wm82.a4.v1	Glycine max	100	121	2.78×10-58	1
ss715578682	0.000354012	0.000354012	476	no hit
ss715579639	-0.000348251	0.000348251	477	no hit
ss715579059	-0.000347629	0.000347629	478	no hit
ss715578789	0.000343274	0.000343274	479	no hit
ss715579317	-0.000341378	0.000341378	480	no hit
ss715579039	-0.000333795	0.000333795	481	no hit
ss715580609	-0.000332201	0.000332201	482	Glyma.01G229400	Glyma.01G229400.1 dsid=glyma.Wm82.gnm4.ann1.Glyma.01G229400.1 pacid=41115815 polypeptide=Glyma.01G229400.1.p locus=Glyma.01G229400 ID=Glyma.01G229400.1.Wm82.a4.v1 annot-version=Wm82.a4.v1	Glycine max	100	121	2.78×10-58	1
ss715579684	-0.000323046	0.000323046	483	no hit
ss715580497	0.000318945	0.000318945	484	no hit
ss715578628	0.000318846	0.000318846	485	no hit
ss715578751	-0.000314456	0.000314456	486	no hit
ss715581120	0.000306199	0.000306199	487	no hit
ss715580463	-0.000302482	0.000302482	488	Glyma.01G216000	Glyma.01G216000.1 dsid=glyma.Wm82.gnm4.ann1.Glyma.01G216000.1 pacid=41116273 polypeptide=Glyma.01G216000.1.p locus=Glyma.01G216000 ID=Glyma.01G216000.1.Wm82.a4.v1 annot-version=Wm82.a4.v1	Glycine max	100	121	2.78×10-58	1
ss715584056	0.000293707	0.000293707	489	no hit
ss715579702	-0.000284331	0.000284331	490	no hit
ss715578951	0.000277488	0.000277488	491	no hit
ss715579799	0.000273365	0.000273365	492	no hit
ss715578739	-0.000272107	0.000272107	493	no hit
ss715578702	-0.000272065	0.000272065	494	no hit
ss715580785	-0.000270109	0.000270109	495	no hit
ss715583916	-0.000268297	0.000268297	496	no hit
ss715578898	-0.000267296	0.000267296	497	no hit
ss715579174	0.000267073	0.000267073	498	no hit
ss715579461	0.000267071	0.000267071	499	no hit
ss715580252	0.000267039	0.000267039	500	no hit
ss715579503	0.000267032	0.000267032	501	no hit
ss715580630	0.000267015	0.000267015	502	no hit
ss715579015	0.000267003	0.000267003	503	no hit
ss715579727	0.000266982	0.000266982	504	no hit
ss715578657	0.000266978	0.000266978	505	no hit
ss715579023	0.000266977	0.000266977	506	no hit
ss715579047	0.000266975	0.000266975	507	no hit
ss715578946	0.000266974	0.000266974	508	Glyma.01G028800	Glyma.01G028800.1 dsid=glyma.Wm82.gnm4.ann1.Glyma.01G028800.1 pacid=41114267 polypeptide=Glyma.01G028800.1.p locus=Glyma.01G028800 ID=Glyma.01G028800.1.Wm82.a4.v1 annot-version=Wm82.a4.v1	Glycine max	100	121	2.78×10-58	1
ss715581552	0.000266971	0.000266971	509	no hit
ss715580859	0.000266966	0.000266966	510	Glyma.01G009400	Glyma.01G009400.2 dsid=glyma.Wm82.gnm4.ann1.Glyma.01G009400.2 pacid=41117136 polypeptide=Glyma.01G009400.2.p locus=Glyma.01G009400 ID=Glyma.01G009400.2.Wm82.a4.v1 annot-version=Wm82.a4.v1	Glycine max	100	121	2.78×10-58	1
ss715580116	0.000266959	0.000266959	511	no hit
ss715579501	0.000266955	0.000266955	512	no hit
ss715579975	0.000266955	0.000266955	513	no hit
ss715579027	0.000266945	0.000266945	514	no hit
ss715580106	0.000266945	0.000266945	515	no hit
ss715579455	0.000266926	0.000266926	516	no hit
ss715579481	0.000266925	0.000266925	517	no hit
ss715579747	0.0002669	0.0002669	518	no hit
ss715580416	0.0002669	0.0002669	519	no hit
ss715578972	0.000266888	0.000266888	520	no hit
ss715578448	0.000266886	0.000266886	521	no hit
ss715578558	0.000266882	0.000266882	522	Glyma.01G016300	Glyma.01G016300.2 dsid=glyma.Wm82.gnm4.ann1.Glyma.01G016300.2 pacid=41116991 polypeptide=Glyma.01G016300.2.p locus=Glyma.01G016300 ID=Glyma.01G016300.2.Wm82.a4.v1 annot-version=Wm82.a4.v1	Glycine max	83	101	3.65×10-47	1
ss715579032	0.000266863	0.000266863	523	no hit
ss715580863	0.000266862	0.000266862	524	no hit
ss715579246	0.00026686	0.00026686	525	no hit
ss715580845	0.000266859	0.000266859	526	no hit
ss715580518	0.000266859	0.000266859	527	no hit
ss715581732	0.000266858	0.000266858	528	no hit
ss715578771	0.000266845	0.000266845	529	no hit
ss715578729	0.00026684	0.00026684	530	no hit
ss715580857	0.000266838	0.000266838	531	no hit
ss715578860	0.000266833	0.000266833	532	no hit
ss715578627	0.000266831	0.000266831	533	no hit
ss715580052	0.000266791	0.000266791	534	no hit
ss715578980	0.000266762	0.000266762	535	no hit
ss715578587	0.000266744	0.000266744	536	no hit
ss715580881	0.000266744	0.000266744	537	no hit
ss715580594	0.000266726	0.000266726	538	no hit
ss715579103	0.000266719	0.000266719	539	no hit
ss715578662	0.000266715	0.000266715	540	no hit
ss715579157	0.000266711	0.000266711	541	no hit
ss715579147	0.000266698	0.000266698	542	no hit
ss715578698	0.000266692	0.000266692	543	no hit
ss715580099	0.000266658	0.000266658	544	no hit
ss715579736	0.000266656	0.000266656	545	no hit
ss715580544	0.000263967	0.000263967	546	Glyma.01G223300	Glyma.01G223300.1 dsid=glyma.Wm82.gnm4.ann1.Glyma.01G223300.1 pacid=41116603 polypeptide=Glyma.01G223300.1.p locus=Glyma.01G223300 ID=Glyma.01G223300.1.Wm82.a4.v1 annot-version=Wm82.a4.v1	Glycine max	27	33	2.31×10-9	1
ss715578487	0.000261304	0.000261304	547	no hit
ss715578584	0.00026123	0.00026123	548	no hit
ss715580169	0.000259881	0.000259881	549	no hit
ss715578669	0.00025945	0.00025945	550	no hit
ss715579163	-0.000259081	0.000259081	551	no hit
ss715579961	-0.000257252	0.000257252	552	no hit
ss715579409	-0.000254941	0.000254941	553	no hit
ss715580200	-0.000254707	0.000254707	554	no hit
ss715579260	-0.000254685	0.000254685	555	no hit
ss715580499	-0.000254678	0.000254678	556	no hit
ss715579950	-0.000254674	0.000254674	557	no hit
ss715580956	-0.000254648	0.000254648	558	no hit
ss715579577	-0.000254638	0.000254638	559	no hit
ss715578901	-0.00025459	0.00025459	560	no hit
ss715579337	-0.000254567	0.000254567	561	no hit
ss715581800	-0.000254558	0.000254558	562	no hit
ss715578825	-0.00025454	0.00025454	563	no hit
ss715581491	-0.000254531	0.000254531	564	Glyma.02G024400	Glyma.02G024400.1 dsid=glyma.Wm82.gnm4.ann1.Glyma.02G024400.1 pacid=41097002 polypeptide=Glyma.02G024400.1.p locus=Glyma.02G024400 ID=Glyma.02G024400.1.Wm82.a4.v1 annot-version=Wm82.a4.v1	Glycine max	100	121	2.78×10-58	1
ss715578670	-0.00025452	0.00025452	565	no hit
ss715579832	-0.000254517	0.000254517	566	Glyma.11G089700	Glyma.11G089700.1 dsid=glyma.Wm82.gnm4.ann1.Glyma.11G089700.1 pacid=41127902 polypeptide=Glyma.11G089700.1.p locus=Glyma.11G089700 ID=Glyma.11G089700.1.Wm82.a4.v1 annot-version=Wm82.a4.v1	Glycine max	41	50	8.19×10-19	1
ss715581708	-0.000254496	0.000254496	567	no hit
ss715579717	-0.000254492	0.000254492	568	no hit
ss715578909	-0.000254489	0.000254489	569	no hit
ss715578809	-0.000254486	0.000254486	570	no hit
ss715583798	-0.000254467	0.000254467	571	Glyma.02G006500	Glyma.02G006500.1 dsid=glyma.Wm82.gnm4.ann1.Glyma.02G006500.1 pacid=41098349 polypeptide=Glyma.02G006500.1.p locus=Glyma.02G006500 ID=Glyma.02G006500.1.Wm82.a4.v1 annot-version=Wm82.a4.v1	Glycine max	100	121	2.78×10-58	1
ss715580882	-0.000254451	0.000254451	572	no hit
ss715579843	-0.000254442	0.000254442	573	no hit
ss715578494	-0.00025444	0.00025444	574	no hit
ss715579459	-0.000254429	0.000254429	575	no hit
ss715578904	-0.00025436	0.00025436	576	no hit
ss715581534	-0.000254356	0.000254356	577	no hit
ss715580575	-0.000254292	0.000254292	578	no hit
ss715579826	-0.000252457	0.000252457	579	no hit
ss715583664	-0.000252432	0.000252432	580	Glyma.16G159550	Glyma.16G159550.1 dsid=glyma.Wm82.gnm4.ann1.Glyma.16G159550.1 pacid=41078058 polypeptide=Glyma.16G159550.1.p locus=Glyma.16G159550 ID=Glyma.16G159550.1.Wm82.a4.v1 annot-version=Wm82.a4.v1	Glycine max	36	38	3.84×10-12	0.955
ss715578933	-0.000248385	0.000248385	581	Glyma.20G200500	Glyma.20G200500.1 dsid=glyma.Wm82.gnm4.ann1.Glyma.20G200500.1 pacid=41090070 polypeptide=Glyma.20G200500.1.p locus=Glyma.20G200500 ID=Glyma.20G200500.1.Wm82.a4.v1 annot-version=Wm82.a4.v1	Glycine max	69	69	2.24×10-29	0.94
ss715580073	-0.000247479	0.000247479	582	Glyma.11G070900	Glyma.11G070900.1 dsid=glyma.Wm82.gnm4.ann1.Glyma.11G070900.1 pacid=41127744 polypeptide=Glyma.11G070900.1.p locus=Glyma.11G070900 ID=Glyma.11G070900.1.Wm82.a4.v1 annot-version=Wm82.a4.v1	Glycine max	49	55	1.36×10-21	0.983
ss715580042	0.000236592	0.000236592	583	no hit
ss715580410	-0.000230692	0.000230692	584	Glyma.01G204700	Glyma.01G204700.1 dsid=glyma.Wm82.gnm4.ann1.Glyma.01G204700.1 pacid=41116129 polypeptide=Glyma.01G204700.1.p locus=Glyma.01G204700 ID=Glyma.01G204700.1.Wm82.a4.v1 annot-version=Wm82.a4.v1	Glycine max	100	121	2.78×10-58	1
ss715579594	-0.000230643	0.000230643	585	no hit
ss715580582	-0.000230586	0.000230586	586	no hit
ss715579872	-0.000227778	0.000227778	587	no hit
ss715579429	-0.000227674	0.000227674	588	no hit
ss715579465	-0.000225937	0.000225937	589	no hit
ss715580548	-0.000223151	0.000223151	590	Glyma.01G223500	Glyma.01G223500.4 dsid=glyma.Wm82.gnm4.ann1.Glyma.01G223500.4 pacid=41117146 polypeptide=Glyma.01G223500.4.p locus=Glyma.01G223500 ID=Glyma.01G223500.4.Wm82.a4.v1 annot-version=Wm82.a4.v1	Glycine max	100	121	2.78×10-58	1
ss715581322	-0.000222535	0.000222535	591	Glyma.02G016800	Glyma.02G016800.1 dsid=glyma.Wm82.gnm4.ann1.Glyma.02G016800.1 pacid=41096892 polypeptide=Glyma.02G016800.1.p locus=Glyma.02G016800 ID=Glyma.02G016800.1.Wm82.a4.v1 annot-version=Wm82.a4.v1	Glycine max	100	121	2.78×10-58	1
ss715579752	-0.000218857	0.000218857	592	Glyma.01G150800	Glyma.01G150800.1 dsid=glyma.Wm82.gnm4.ann1.Glyma.01G150800.1 pacid=41117190 polypeptide=Glyma.01G150800.1.p locus=Glyma.01G150800 ID=Glyma.01G150800.1.Wm82.a4.v1 annot-version=Wm82.a4.v1	Glycine max	26	28	1.39×10-6	0.969
ss715583999	-0.0002181	0.0002181	593	no hit
ss715579524	-0.000217899	0.000217899	594	no hit
ss715579114	-0.000217406	0.000217406	595	no hit
ss715579645	-0.000215592	0.000215592	596	no hit
ss715578973	-0.00021456	0.00021456	597	no hit
ss715578681	-0.000213353	0.000213353	598	no hit
ss715579681	-0.000211979	0.000211979	599	no hit
ss715579183	0.000208464	0.000208464	600	no hit
ss715579010	-0.000203961	0.000203961	601	no hit
ss715580929	-0.000203567	0.000203567	602	no hit
ss715580376	-0.000202195	0.000202195	603	no hit
ss715579185	-0.000202048	0.000202048	604	no hit
ss715580447	-0.000194323	0.000194323	605	no hit
ss715579634	-0.00019108	0.00019108	606	no hit
ss715579335	0.00019047	0.00019047	607	no hit
ss715579610	-0.000188522	0.000188522	608	no hit
ss715579323	-0.000184382	0.000184382	609	no hit
ss715584015	-0.000183724	0.000183724	610	no hit
ss715579313	0.00018093	0.00018093	611	no hit
ss715580683	0.00017662	0.00017662	612	no hit
ss715579780	-0.000175371	0.000175371	613	no hit
ss715581759	-0.000169288	0.000169288	614	no hit
ss715578894	0.00016924	0.00016924	615	Glyma.01G001900	Glyma.01G001900.2 dsid=glyma.Wm82.gnm4.ann1.Glyma.01G001900.2 pacid=41115132 polypeptide=Glyma.01G001900.2.p locus=Glyma.01G001900 ID=Glyma.01G001900.2.Wm82.a4.v1 annot-version=Wm82.a4.v1	Glycine max	100	121	2.78×10-58	1
ss715578940	-0.000159791	0.000159791	616	no hit
ss715578891	0.000150547	0.000150547	617	no hit
ss715580437	-0.000150497	0.000150497	618	Glyma.01G046300	Glyma.01G046300.1 dsid=glyma.Wm82.gnm4.ann1.Glyma.01G046300.1 pacid=41116008 polypeptide=Glyma.01G046300.1.p locus=Glyma.01G046300 ID=Glyma.01G046300.1.Wm82.a4.v1 annot-version=Wm82.a4.v1	Glycine max	100	121	2.78×10-58	1
ss715578622	-0.000150484	0.000150484	619	Glyma.01G018800	Glyma.01G018800.1 dsid=glyma.Wm82.gnm4.ann1.Glyma.01G018800.1 pacid=41117069 polypeptide=Glyma.01G018800.1.p locus=Glyma.01G018800 ID=Glyma.01G018800.1.Wm82.a4.v1 annot-version=Wm82.a4.v1	Glycine max	80	97	6.11×10-45	1
ss715578691	-0.000150476	0.000150476	620	no hit
ss715579580	-0.000150471	0.000150471	621	no hit
ss715579351	-0.000150467	0.000150467	622	no hit
ss715579201	-0.000150462	0.000150462	623	no hit
ss715578983	-0.00015046	0.00015046	624	no hit
ss715579237	-0.000150459	0.000150459	625	no hit
ss715580764	-0.000150458	0.000150458	626	no hit
ss715579202	-0.000150452	0.000150452	627	no hit
ss715579586	-0.000150448	0.000150448	628	no hit
ss715580576	-0.000150439	0.000150439	629	no hit
ss715579879	-0.000150432	0.000150432	630	no hit
ss715579934	-0.000150423	0.000150423	631	no hit
ss715580290	-0.000150417	0.000150417	632	no hit
ss715580763	-0.000150413	0.000150413	633	no hit
ss715580782	-0.00015041	0.00015041	634	no hit
ss715578420	-0.000150409	0.000150409	635	no hit
ss715580589	-0.000150407	0.000150407	636	no hit
ss715579834	-0.000150406	0.000150406	637	no hit
ss715580547	-0.000150406	0.000150406	638	no hit
ss715580002	-0.000150401	0.000150401	639	no hit
ss715580140	-0.000150401	0.000150401	640	no hit
ss715580192	-0.000150401	0.000150401	641	no hit
ss715580767	-0.000150394	0.000150394	642	Glyma.01G052900	Glyma.01G052900.3 dsid=glyma.Wm82.gnm4.ann1.Glyma.01G052900.3 pacid=41114311 polypeptide=Glyma.01G052900.3.p locus=Glyma.01G052900 ID=Glyma.01G052900.3.Wm82.a4.v1 annot-version=Wm82.a4.v1	Glycine max	100	121	2.78×10-58	1
ss715579851	-0.000150392	0.000150392	643	no hit
ss715578504	-0.000150389	0.000150389	644	no hit
ss715579884	-0.000150389	0.000150389	645	Glyma.01G157400	Glyma.01G157400.1 dsid=glyma.Wm82.gnm4.ann1.Glyma.01G157400.1 pacid=41114454 polypeptide=Glyma.01G157400.1.p locus=Glyma.01G157400 ID=Glyma.01G157400.1.Wm82.a4.v1 annot-version=Wm82.a4.v1	Glycine max	99	120	1.00×10-57	1
ss715580059	-0.000150389	0.000150389	646	no hit
ss715580729	-0.000150387	0.000150387	647	no hit
ss715580442	-0.000150386	0.000150386	648	Glyma.01G210700	Glyma.01G210700.1 dsid=glyma.Wm82.gnm4.ann1.Glyma.01G210700.1 pacid=41115957 polypeptide=Glyma.01G210700.1.p locus=Glyma.01G210700 ID=Glyma.01G210700.1.Wm82.a4.v1 annot-version=Wm82.a4.v1	Glycine max	100	121	2.78×10-58	1
ss715580286	-0.000150384	0.000150384	649	no hit
ss715580285	-0.000150379	0.000150379	650	no hit
ss715580304	-0.000150374	0.000150374	651	no hit
ss715579827	-0.000150372	0.000150372	652	no hit
ss715578907	-0.00015037	0.00015037	653	Glyma.01G027900	Glyma.01G027900.1 dsid=glyma.Wm82.gnm4.ann1.Glyma.01G027900.1 pacid=41114317 polypeptide=Glyma.01G027900.1.p locus=Glyma.01G027900 ID=Glyma.01G027900.1.Wm82.a4.v1 annot-version=Wm82.a4.v1	Glycine max	83	101	3.65×10-47	1
ss715579221	-0.000150369	0.000150369	654	no hit
ss715579268	-0.000150368	0.000150368	655	Glyma.01G036700	Glyma.01G036700.1 dsid=glyma.Wm82.gnm4.ann1.Glyma.01G036700.1 pacid=41115295 polypeptide=Glyma.01G036700.1.p locus=Glyma.01G036700 ID=Glyma.01G036700.1.Wm82.a4.v1 annot-version=Wm82.a4.v1	Glycine max	83	100	1.31×10-46	1
ss715579789	-0.000150366	0.000150366	656	no hit
ss715580221	-0.000150366	0.000150366	657	no hit
ss715580564	-0.000150363	0.000150363	658	no hit
ss715578656	-0.000150362	0.000150362	659	no hit
ss715580793	-0.000150358	0.000150358	660	no hit
ss715578449	-0.000150356	0.000150356	661	no hit
ss715580830	-0.00015035	0.00015035	662	no hit
ss715580560	-0.000150345	0.000150345	663	Glyma.01G224300	Glyma.01G224300.1 dsid=glyma.Wm82.gnm4.ann1.Glyma.01G224300.1 pacid=41116004 polypeptide=Glyma.01G224300.1.p locus=Glyma.01G224300 ID=Glyma.01G224300.1.Wm82.a4.v1 annot-version=Wm82.a4.v1	Glycine max	100	121	2.78×10-58	1
ss715578403	-0.000150335	0.000150335	664	no hit
ss715579642	-0.000150335	0.000150335	665	no hit
ss715581499	-0.000150334	0.000150334	666	no hit
ss715578557	-0.00015033	0.00015033	667	no hit
ss715578976	-0.000150321	0.000150321	668	no hit
ss715580339	-0.000150321	0.000150321	669	no hit
ss715579012	-0.000150318	0.000150318	670	no hit
ss715580684	-0.000150316	0.000150316	671	no hit
ss715578950	-0.000150314	0.000150314	672	Glyma.01G094300	Glyma.01G094300.1 dsid=glyma.Wm82.gnm4.ann1.Glyma.01G094300.1 pacid=41117120 polypeptide=Glyma.01G094300.1.p locus=Glyma.01G094300 ID=Glyma.01G094300.1.Wm82.a4.v1 annot-version=Wm82.a4.v1	Glycine max	77	93	1.02×10-42	1
ss715580055	-0.000150313	0.000150313	673	no hit
ss715579075	-0.00015031	0.00015031	674	no hit
ss715581419	-0.000150306	0.000150306	675	no hit
ss715579509	-0.000150305	0.000150305	676	no hit
ss715580529	-0.0001503	0.0001503	677	Glyma.11G021000	Glyma.11G021000.1 dsid=glyma.Wm82.gnm4.ann1.Glyma.11G021000.1 pacid=41127511 polypeptide=Glyma.11G021000.1.p locus=Glyma.11G021000 ID=Glyma.11G021000.1.Wm82.a4.v1 annot-version=Wm82.a4.v1	Glycine max	31	31	2.99×10-8	0.947
ss715639168	-0.000150299	0.000150299	678	no hit
ss715578410	-0.000150297	0.000150297	679	no hit
ss715578886	-0.000150296	0.000150296	680	no hit
ss715579914	-0.000150296	0.000150296	681	no hit
ss715579181	-0.000150292	0.000150292	682	Glyma.01G035400	Glyma.01G035400.1 dsid=glyma.Wm82.gnm4.ann1.Glyma.01G035400.1 pacid=41115636 polypeptide=Glyma.01G035400.1.p locus=Glyma.01G035400 ID=Glyma.01G035400.1.Wm82.a4.v1 annot-version=Wm82.a4.v1	Glycine max	100	121	2.78×10-58	1
ss715580151	-0.000150279	0.000150279	683	no hit
ss715580234	-0.000150278	0.000150278	684	no hit
ss715580267	-0.000150278	0.000150278	685	no hit
ss715580472	-0.000150274	0.000150274	686	Glyma.01G217100	Glyma.01G217100.1 dsid=glyma.Wm82.gnm4.ann1.Glyma.01G217100.1 pacid=41114704 polypeptide=Glyma.01G217100.1.p locus=Glyma.01G217100 ID=Glyma.01G217100.1.Wm82.a4.v1 annot-version=Wm82.a4.v1	Glycine max	100	121	2.78×10-58	1
ss715579719	-0.000150273	0.000150273	687	no hit
ss715578735	-0.000150267	0.000150267	688	no hit
ss715578918	-0.000150267	0.000150267	689	no hit
ss715580796	-0.000150265	0.000150265	690	no hit
ss715581523	-0.000150265	0.000150265	691	no hit
ss715581435	-0.000150264	0.000150264	692	no hit
ss715580349	-0.000150263	0.000150263	693	no hit
ss715580302	-0.000150262	0.000150262	694	no hit
ss715578406	-0.00015026	0.00015026	695	Glyma.01G010400	Glyma.01G010400.1 dsid=glyma.Wm82.gnm4.ann1.Glyma.01G010400.1 pacid=41114163 polypeptide=Glyma.01G010400.1.p locus=Glyma.01G010400 ID=Glyma.01G010400.1.Wm82.a4.v1 annot-version=Wm82.a4.v1	Glycine max	42	48	1.06×10-17	0.98
ss715580513	-0.000150258	0.000150258	696	no hit
ss715579135	-0.000150254	0.000150254	697	Glyma.01G034600	Glyma.01G034600.1 dsid=glyma.Wm82.gnm4.ann1.Glyma.01G034600.1 pacid=41115757 polypeptide=Glyma.01G034600.1.p locus=Glyma.01G034600 ID=Glyma.01G034600.1.Wm82.a4.v1 annot-version=Wm82.a4.v1	Glycine max	73	82	1.33×10-36	0.978
ss715578579	-0.000150254	0.000150254	698	no hit
ss715579343	-0.000150253	0.000150253	699	no hit
ss715579095	-0.000150252	0.000150252	700	no hit
ss715578818	-0.000150249	0.000150249	701	no hit
ss715579716	-0.000150242	0.000150242	702	no hit
ss715579925	-0.000150242	0.000150242	703	no hit
ss715578743	-0.000150241	0.000150241	704	Glyma.01G001300	Glyma.01G001300.5 dsid=glyma.Wm82.gnm4.ann1.Glyma.01G001300.5 pacid=41116076 polypeptide=Glyma.01G001300.5.p locus=Glyma.01G001300 ID=Glyma.01G001300.5.Wm82.a4.v1 annot-version=Wm82.a4.v1	Glycine max	80	92	3.68×10-42	0.98
ss715578866	-0.00015024	0.00015024	705	no hit
ss715579491	-0.000150238	0.000150238	706	no hit
ss715579048	-0.000150233	0.000150233	707	Glyma.01G002501	Glyma.01G002501.3 dsid=glyma.Wm82.gnm4.ann1.Glyma.01G002501.3 pacid=41116576 polypeptide=Glyma.01G002501.3.p locus=Glyma.01G002501 ID=Glyma.01G002501.3.Wm82.a4.v1 annot-version=Wm82.a4.v1	Glycine max	42	51	2.28×10-19	1
ss715578536	-0.000150231	0.000150231	708	no hit
ss715579659	-0.000150231	0.000150231	709	no hit
ss715579844	-0.00015023	0.00015023	710	no hit
ss715580215	-0.00015023	0.00015023	711	no hit
ss715578578	-0.000150228	0.000150228	712	Glyma.01G017000	Glyma.01G017000.1 dsid=glyma.Wm82.gnm4.ann1.Glyma.01G017000.1 pacid=41117148 polypeptide=Glyma.01G017000.1.p locus=Glyma.01G017000 ID=Glyma.01G017000.1.Wm82.a4.v1 annot-version=Wm82.a4.v1	Glycine max	100	121	2.78×10-58	1
ss715579256	-0.000150228	0.000150228	713	no hit
ss715579847	-0.000150228	0.000150228	714	no hit
ss715580013	-0.000150223	0.000150223	715	Glyma.01G167400	Glyma.01G167400.1 dsid=glyma.Wm82.gnm4.ann1.Glyma.01G167400.1 pacid=41117151 polypeptide=Glyma.01G167400.1.p locus=Glyma.01G167400 ID=Glyma.01G167400.1.Wm82.a4.v1 annot-version=Wm82.a4.v1	Glycine max	100	121	2.78×10-58	1
ss715579942	-0.000150221	0.000150221	716	no hit
ss715579239	-0.00015022	0.00015022	717	no hit
ss715580734	-0.000150219	0.000150219	718	no hit
ss715580561	-0.000150217	0.000150217	719	no hit
ss715578754	-0.000150214	0.000150214	720	Glyma.01G001300	Glyma.01G001300.4 dsid=glyma.Wm82.gnm4.ann1.Glyma.01G001300.4 pacid=41116075 polypeptide=Glyma.01G001300.4.p locus=Glyma.01G001300 ID=Glyma.01G001300.4.Wm82.a4.v1 annot-version=Wm82.a4.v1	Glycine max	54	65	3.76×10-27	1
ss715578426	-0.000150214	0.000150214	721	no hit
ss715579698	-0.000150214	0.000150214	722	no hit
ss715579974	-0.000150214	0.000150214	723	no hit
ss715580593	-0.000150213	0.000150213	724	no hit
ss715579508	-0.00015021	0.00015021	725	no hit
ss715580752	-0.000150209	0.000150209	726	no hit
ss715581008	-0.000150209	0.000150209	727	no hit
ss715580728	-0.000150208	0.000150208	728	Glyma.01G245600	Glyma.01G245600.1 dsid=glyma.Wm82.gnm4.ann1.Glyma.01G245600.1 pacid=41116906 polypeptide=Glyma.01G245600.1.p locus=Glyma.01G245600 ID=Glyma.01G245600.1.Wm82.a4.v1 annot-version=Wm82.a4.v1	Glycine max	59	71	1.74×10-30	1
ss715579029	-0.000150207	0.000150207	729	no hit
ss715579548	-0.000150207	0.000150207	730	no hit
ss715578843	-0.000150206	0.000150206	731	no hit
ss715578590	-0.000150202	0.000150202	732	no hit
ss715580395	-0.000150202	0.000150202	733	no hit
ss715580670	-0.000150198	0.000150198	734	no hit
ss715580114	-0.000150197	0.000150197	735	no hit
ss715579647	-0.000150196	0.000150196	736	no hit
ss715579569	-0.000150195	0.000150195	737	no hit
ss715580508	-0.000150191	0.000150191	738	no hit
ss715583506	-0.000150191	0.000150191	739	no hit
ss715579222	-0.000150187	0.000150187	740	no hit
ss715579316	-0.000150187	0.000150187	741	no hit
ss715579390	-0.000150183	0.000150183	742	no hit
ss715579278	-0.000150181	0.000150181	743	no hit
ss715579703	-0.000150179	0.000150179	744	no hit
ss715579118	-0.000150176	0.000150176	745	no hit
ss715580261	-0.000150165	0.000150165	746	no hit
ss715581528	-0.000150165	0.000150165	747	no hit
ss715581576	-0.000150162	0.000150162	748	no hit
ss715580556	-0.00015016	0.00015016	749	no hit
ss715578423	-0.000150159	0.000150159	750	no hit
ss715578965	-0.000150156	0.000150156	751	no hit
ss715579450	-0.000150155	0.000150155	752	Glyma.01G127900	Glyma.01G127900.2 dsid=glyma.Wm82.gnm4.ann1.Glyma.01G127900.2 pacid=41117464 polypeptide=Glyma.01G127900.2.p locus=Glyma.01G127900 ID=Glyma.01G127900.2.Wm82.a4.v1 annot-version=Wm82.a4.v1	Glycine max	100	121	2.78×10-58	1
ss715579769	-0.000150155	0.000150155	753	no hit
ss715580523	-0.00015015	0.00015015	754	no hit
ss715579052	-0.000150144	0.000150144	755	Glyma.01G002600	Glyma.01G002600.1 dsid=glyma.Wm82.gnm4.ann1.Glyma.01G002600.1 pacid=41115716 polypeptide=Glyma.01G002600.1.p locus=Glyma.01G002600 ID=Glyma.01G002600.1.Wm82.a4.v1 annot-version=Wm82.a4.v1	Glycine max	100	121	2.78×10-58	1
ss715579664	-0.000150144	0.000150144	756	no hit
ss715580408	-0.000150142	0.000150142	757	no hit
ss715579477	-0.000150141	0.000150141	758	no hit
ss715578896	-0.00015014	0.00015014	759	no hit
ss715580528	-0.000150136	0.000150136	760	no hit
ss715581806	-0.000150133	0.000150133	761	no hit
ss715580258	-0.000150129	0.000150129	762	no hit
ss715579436	-0.000150128	0.000150128	763	Glyma.01G039700	Glyma.01G039700.1 dsid=glyma.Wm82.gnm4.ann1.Glyma.01G039700.1 pacid=41118035 polypeptide=Glyma.01G039700.1.p locus=Glyma.01G039700 ID=Glyma.01G039700.1.Wm82.a4.v1 annot-version=Wm82.a4.v1	Glycine max	100	121	2.78×10-58	1
ss715580066	-0.000150128	0.000150128	764	no hit
ss715578606	-0.000150125	0.000150125	765	no hit
ss715579842	-0.000150125	0.000150125	766	no hit
ss715578984	-0.000150121	0.000150121	767	no hit
ss715578631	-0.000150119	0.000150119	768	no hit
ss715580792	-0.000150116	0.000150116	769	Glyma.01G056800	Glyma.01G056800.8 dsid=glyma.Wm82.gnm4.ann1.Glyma.01G056800.8 pacid=41117251 polypeptide=Glyma.01G056800.8.p locus=Glyma.01G056800 ID=Glyma.01G056800.8.Wm82.a4.v1 annot-version=Wm82.a4.v1	Glycine max	100	121	2.78×10-58	1
ss715580272	-0.000150115	0.000150115	770	no hit
ss715579408	-0.00015011	0.00015011	771	no hit
ss715580658	-0.000150109	0.000150109	772	no hit
ss715579984	-0.000150103	0.000150103	773	no hit
ss715578961	-0.000150099	0.000150099	774	Glyma.01G097200	Glyma.01G097200.7 dsid=glyma.Wm82.gnm4.ann1.Glyma.01G097200.7 pacid=41115553 polypeptide=Glyma.01G097200.7.p locus=Glyma.01G097200 ID=Glyma.01G097200.7.Wm82.a4.v1 annot-version=Wm82.a4.v1	Glycine max	90	109	1.30×10-51	1
ss715580813	-0.000150097	0.000150097	775	no hit
ss715580610	-0.000150096	0.000150096	776	no hit
ss715581572	-0.000150094	0.000150094	777	no hit
ss715578915	-0.000150089	0.000150089	778	no hit
ss715578963	-0.000150081	0.000150081	779	no hit
ss715579416	-0.000150081	0.000150081	780	no hit
ss715580091	-0.000150079	0.000150079	781	no hit
ss715579171	-0.000150075	0.000150075	782	no hit
ss715579311	-0.000150071	0.000150071	783	no hit
ss715578859	-0.00015007	0.00015007	784	no hit
ss715580860	-0.000150067	0.000150067	785	no hit
ss715580438	-0.000150063	0.000150063	786	Glyma.01G209900	Glyma.01G209900.5 dsid=glyma.Wm82.gnm4.ann1.Glyma.01G209900.5 pacid=41117535 polypeptide=Glyma.01G209900.5.p locus=Glyma.01G209900 ID=Glyma.01G209900.5.Wm82.a4.v1 annot-version=Wm82.a4.v1	Glycine max	40	49	2.95×10-18	1
ss715579153	-0.000150062	0.000150062	787	no hit
ss715580300	-0.000150061	0.000150061	788	no hit
ss715579573	-0.000150053	0.000150053	789	no hit
ss715579620	-0.000150049	0.000150049	790	no hit
ss715579995	-0.000150046	0.000150046	791	no hit
ss715579765	-0.000150043	0.000150043	792	no hit
ss715578975	-0.00015004	0.00015004	793	Glyma.01G029600	Glyma.01G029600.1 dsid=glyma.Wm82.gnm4.ann1.Glyma.01G029600.1 pacid=41115810 polypeptide=Glyma.01G029600.1.p locus=Glyma.01G029600 ID=Glyma.01G029600.1.Wm82.a4.v1 annot-version=Wm82.a4.v1	Glycine max	26	32	8.31×10-9	1
ss715578583	-0.00015004	0.00015004	794	no hit
ss715583754	-0.000150033	0.000150033	795	Glyma.02G006000	Glyma.02G006000.2 dsid=glyma.Wm82.gnm4.ann1.Glyma.02G006000.2 pacid=41096113 polypeptide=Glyma.02G006000.2.p locus=Glyma.02G006000 ID=Glyma.02G006000.2.Wm82.a4.v1 annot-version=Wm82.a4.v1	Glycine max	100	121	2.78×10-58	1
ss715579650	-0.000150028	0.000150028	796	no hit
ss715580820	-0.000150025	0.000150025	797	no hit
ss715580389	-0.000150011	0.000150011	798	no hit
ss715578500	-0.000150003	0.000150003	799	no hit
ss715580345	-0.00014969	0.00014969	800	no hit
ss715578757	-0.000149413	0.000149413	801	no hit
ss715578418	-0.000149213	0.000149213	802	Glyma.01G011100	Glyma.01G011100.1 dsid=glyma.Wm82.gnm4.ann1.Glyma.01G011100.1 pacid=41115401 polypeptide=Glyma.01G011100.1.p locus=Glyma.01G011100 ID=Glyma.01G011100.1.Wm82.a4.v1 annot-version=Wm82.a4.v1	Glycine max	35	42	2.29×10-14	1
ss715578643	-0.000148381	0.000148381	803	Glyma.01G019400	Glyma.01G019400.4 dsid=glyma.Wm82.gnm4.ann1.Glyma.01G019400.4 pacid=41117463 polypeptide=Glyma.01G019400.4.p locus=Glyma.01G019400 ID=Glyma.01G019400.4.Wm82.a4.v1 annot-version=Wm82.a4.v1	Glycine max	100	121	2.78×10-58	1
ss715578969	0.000148107	0.000148107	804	no hit
ss715580360	-0.000147407	0.000147407	805	no hit
ss715579314	-0.000147373	0.000147373	806	no hit
ss715580441	-0.000146116	0.000146116	807	no hit
ss715578887	-0.000145751	0.000145751	808	Glyma.01G001900	Glyma.01G001900.2 dsid=glyma.Wm82.gnm4.ann1.Glyma.01G001900.2 pacid=41115132 polypeptide=Glyma.01G001900.2.p locus=Glyma.01G001900 ID=Glyma.01G001900.2.Wm82.a4.v1 annot-version=Wm82.a4.v1	Glycine max	34	41	8.25×10-14	1
ss715580132	-0.000145543	0.000145543	809	Glyma.01G179400	Glyma.01G179400.1 dsid=glyma.Wm82.gnm4.ann1.Glyma.01G179400.1 pacid=41116852 polypeptide=Glyma.01G179400.1.p locus=Glyma.01G179400 ID=Glyma.01G179400.1.Wm82.a4.v1 annot-version=Wm82.a4.v1	Glycine max	100	121	2.78×10-58	1
ss715580608	-0.000144427	0.000144427	810	no hit
ss715580559	-0.00014427	0.00014427	811	no hit
ss715579931	-0.000143977	0.000143977	812	Glyma.16G159550	Glyma.16G159550.1 dsid=glyma.Wm82.gnm4.ann1.Glyma.16G159550.1 pacid=41078058 polypeptide=Glyma.16G159550.1.p locus=Glyma.16G159550 ID=Glyma.16G159550.1.Wm82.a4.v1 annot-version=Wm82.a4.v1	Glycine max	60	44	1.77×10-15	0.868
ss715578732	-0.000143831	0.000143831	813	no hit
ss715580291	-0.000141399	0.000141399	814	Glyma.01G192900	Glyma.01G192900.2 dsid=glyma.Wm82.gnm4.ann1.Glyma.01G192900.2 pacid=41117094 polypeptide=Glyma.01G192900.2.p locus=Glyma.01G192900 ID=Glyma.01G192900.2.Wm82.a4.v1 annot-version=Wm82.a4.v1	Glycine max	36	43	6.38×10-15	1
ss715578971	-0.000141319	0.000141319	815	no hit
ss715579428	-0.00014041	0.00014041	816	no hit
ss715580449	-0.00014029	0.00014029	817	Glyma.01G213500	Glyma.01G213500.1 dsid=glyma.Wm82.gnm4.ann1.Glyma.01G213500.1 pacid=41116990 polypeptide=Glyma.01G213500.1.p locus=Glyma.01G213500 ID=Glyma.01G213500.1.Wm82.a4.v1 annot-version=Wm82.a4.v1	Glycine max	68	82	1.33×10-36	1
ss715580827	-0.000138389	0.000138389	818	no hit
ss715578529	0.000135197	0.000135197	819	no hit
ss715579880	-0.000132916	0.000132916	820	no hit
ss715579712	-0.00013284	0.00013284	821	no hit
ss715579286	-0.000132421	0.000132421	822	Glyma.01G036800	Glyma.01G036800.1 dsid=glyma.Wm82.gnm4.ann1.Glyma.01G036800.1 pacid=41116421 polypeptide=Glyma.01G036800.1.p locus=Glyma.01G036800 ID=Glyma.01G036800.1.Wm82.a4.v1 annot-version=Wm82.a4.v1	Glycine max	100	121	2.78×10-58	1
ss715578645	0.000131453	0.000131453	823	no hit
ss715580362	-0.000128485	0.000128485	824	no hit
ss715580871	-0.000126622	0.000126622	825	Glyma.01G009700	Glyma.01G009700.1 dsid=glyma.Wm82.gnm4.ann1.Glyma.01G009700.1 pacid=41115429 polypeptide=Glyma.01G009700.1.p locus=Glyma.01G009700 ID=Glyma.01G009700.1.Wm82.a4.v1 annot-version=Wm82.a4.v1	Glycine max	100	121	2.78×10-58	1
ss715578717	0.000121513	0.000121513	826	no hit
ss715578772	0.000120487	0.000120487	827	no hit
ss715579345	-0.000119901	0.000119901	828	no hit
ss715580775	0.00011982	0.00011982	829	Glyma.01G007000	Glyma.01G007000.3 dsid=glyma.Wm82.gnm4.ann1.Glyma.01G007000.3 pacid=41116275 polypeptide=Glyma.01G007000.3.p locus=Glyma.01G007000 ID=Glyma.01G007000.3.Wm82.a4.v1 annot-version=Wm82.a4.v1	Glycine max	100	121	2.78×10-58	1
ss715580815	0.000118684	0.000118684	830	no hit
ss715579141	0.000118346	0.000118346	831	no hit
ss715578642	-0.000117398	0.000117398	832	no hit
ss715580760	-0.000116733	0.000116733	833	no hit
ss715579037	-0.000115501	0.000115501	834	Glyma.01G031800	Glyma.01G031800.5 dsid=glyma.Wm82.gnm4.ann1.Glyma.01G031800.5 pacid=41115780 polypeptide=Glyma.01G031800.5.p locus=Glyma.01G031800 ID=Glyma.01G031800.5.Wm82.a4.v1 annot-version=Wm82.a4.v1	Glycine max	100	121	2.78×10-58	1
ss715579718	-0.000111553	0.000111553	835	Glyma.01G043800	Glyma.01G043800.1 dsid=glyma.Wm82.gnm4.ann1.Glyma.01G043800.1 pacid=41117541 polypeptide=Glyma.01G043800.1.p locus=Glyma.01G043800 ID=Glyma.01G043800.1.Wm82.a4.v1 annot-version=Wm82.a4.v1	Glycine max	100	121	2.78×10-58	1
ss715580883	0.000111312	0.000111312	836	no hit
ss715578456	0.000111287	0.000111287	837	Glyma.01G013100	Glyma.01G013100.1 dsid=glyma.Wm82.gnm4.ann1.Glyma.01G013100.1 pacid=41116475 polypeptide=Glyma.01G013100.1.p locus=Glyma.01G013100 ID=Glyma.01G013100.1.Wm82.a4.v1 annot-version=Wm82.a4.v1	Glycine max	100	121	2.78×10-58	1
ss715578750	0.000110701	0.000110701	838	no hit
ss715579353	0.000110684	0.000110684	839	no hit
ss715580844	0.000110682	0.000110682	840	no hit
ss715579595	0.000110681	0.000110681	841	Glyma.01G042900	Glyma.01G042900.1 dsid=glyma.Wm82.gnm4.ann1.Glyma.01G042900.1 pacid=41115114 polypeptide=Glyma.01G042900.1.p locus=Glyma.01G042900 ID=Glyma.01G042900.1.Wm82.a4.v1 annot-version=Wm82.a4.v1	Glycine max	100	121	2.78×10-58	1
ss715578979	0.000110677	0.000110677	842	no hit
ss715579034	0.000110675	0.000110675	843	no hit
ss715579244	0.000110659	0.000110659	844	no hit
ss715580173	0.000110658	0.000110658	845	no hit
ss715578879	0.000110641	0.000110641	846	no hit
ss715579253	0.00011064	0.00011064	847	no hit
ss715579754	0.000110638	0.000110638	848	no hit
ss715579983	0.000110636	0.000110636	849	no hit
ss715578957	0.000110621	0.000110621	850	no hit
ss715579553	0.00011062	0.00011062	851	no hit
ss715578827	0.000110613	0.000110613	852	no hit
ss715578474	0.000110611	0.000110611	853	no hit
ss715579941	0.000110605	0.000110605	854	Glyma.01G163300	Glyma.01G163300.1 dsid=glyma.Wm82.gnm4.ann1.Glyma.01G163300.1 pacid=41116126 polypeptide=Glyma.01G163300.1.p locus=Glyma.01G163300 ID=Glyma.01G163300.1.Wm82.a4.v1 annot-version=Wm82.a4.v1	Glycine max	36	40	2.97×10-13	0.977
ss715580632	0.000110604	0.000110604	855	no hit
ss715578703	0.000110594	0.000110594	856	no hit
ss715579636	0.000110592	0.000110592	857	no hit
ss715578722	0.000110589	0.000110589	858	Glyma.01G022500	Glyma.01G022500.1 dsid=glyma.Wm82.gnm4.ann1.Glyma.01G022500.1 pacid=41116214 polypeptide=Glyma.01G022500.1.p locus=Glyma.01G022500 ID=Glyma.01G022500.1.Wm82.a4.v1 annot-version=Wm82.a4.v1	Glycine max	100	121	2.78×10-58	1
ss715579525	0.000110586	0.000110586	859	no hit
ss715580640	0.000110584	0.000110584	860	no hit
ss715580643	0.000110581	0.000110581	861	no hit
ss715578694	0.000110578	0.000110578	862	no hit
ss715579382	0.000110577	0.000110577	863	no hit
ss715578762	0.000110574	0.000110574	864	no hit
ss715583621	0.000110574	0.000110574	865	no hit
ss715579966	0.00011057	0.00011057	866	no hit
ss715581341	0.000110569	0.000110569	867	Glyma.02G017400	Glyma.02G017400.2 dsid=glyma.Wm82.gnm4.ann1.Glyma.02G017400.2 pacid=41096058 polypeptide=Glyma.02G017400.2.p locus=Glyma.02G017400 ID=Glyma.02G017400.2.Wm82.a4.v1 annot-version=Wm82.a4.v1	Glycine max	97	117	4.66×10-56	1
ss715579430	0.000110561	0.000110561	868	no hit
ss715579980	0.000110559	0.000110559	869	no hit
ss715578592	0.000110558	0.000110558	870	no hit
ss715580766	0.000110556	0.000110556	871	no hit
ss715580771	0.000110555	0.000110555	872	Glyma.18G074800	Glyma.18G074800.1 dsid=glyma.Wm82.gnm4.ann1.Glyma.18G074800.1 pacid=41165691 polypeptide=Glyma.18G074800.1.p locus=Glyma.18G074800 ID=Glyma.18G074800.1.Wm82.a4.v1 annot-version=Wm82.a4.v1	Glycine max	100	115	6.02×10-55	0.983
ss715578594	0.000110555	0.000110555	873	no hit
ss715579777	0.000110554	0.000110554	874	no hit
ss715580840	0.000110553	0.000110553	875	no hit
ss715580396	0.000110553	0.000110553	876	no hit
ss715580614	0.000110552	0.000110552	877	no hit
ss715579004	0.000110547	0.000110547	878	no hit
ss715578429	0.000110537	0.000110537	879	no hit
ss715578701	0.000110524	0.000110524	880	Glyma.01G021450	Glyma.01G021450.1 dsid=glyma.Wm82.gnm4.ann1.Glyma.01G021450.1 pacid=41115868 polypeptide=Glyma.01G021450.1.p locus=Glyma.01G021450 ID=Glyma.01G021450.1.Wm82.a4.v1 annot-version=Wm82.a4.v1	Glycine max	45	54	4.89×10-21	1
ss715578801	0.000110522	0.000110522	881	Glyma.01G025000	Glyma.01G025000.2 dsid=glyma.Wm82.gnm4.ann1.Glyma.01G025000.2 pacid=41116288 polypeptide=Glyma.01G025000.2.p locus=Glyma.01G025000 ID=Glyma.01G025000.2.Wm82.a4.v1 annot-version=Wm82.a4.v1	Glycine max	100	121	2.78×10-58	1
ss715580043	0.000110522	0.000110522	882	Glyma.01G169800	Glyma.01G169800.3 dsid=glyma.Wm82.gnm4.ann1.Glyma.01G169800.3 pacid=41117838 polypeptide=Glyma.01G169800.3.p locus=Glyma.01G169800 ID=Glyma.01G169800.3.Wm82.a4.v1 annot-version=Wm82.a4.v1	Glycine max	100	121	2.78×10-58	1
ss715579977	0.00011051	0.00011051	883	no hit
ss715579976	0.000110509	0.000110509	884	no hit
ss715580021	0.000110509	0.000110509	885	no hit
ss715580655	0.000110509	0.000110509	886	no hit
ss715581726	0.000110508	0.000110508	887	no hit
ss715579784	0.000110506	0.000110506	888	no hit
ss715583614	0.000110505	0.000110505	889	no hit
ss715580319	0.000110503	0.000110503	890	no hit
ss715580400	0.000110502	0.000110502	891	no hit
ss715578964	0.0001105	0.0001105	892	no hit
ss715580886	0.000110498	0.000110498	893	Glyma.19G258100	Glyma.19G258100.1 dsid=glyma.Wm82.gnm4.ann1.Glyma.19G258100.1 pacid=41162631 polypeptide=Glyma.19G258100.1.p locus=Glyma.19G258100 ID=Glyma.19G258100.1.Wm82.a4.v1 annot-version=Wm82.a4.v1	Glycine max	98	82	1.33×10-36	0.898
ss715578402	0.000110492	0.000110492	894	no hit
ss715579360	0.000110485	0.000110485	895	no hit
ss715581660	0.000110481	0.000110481	896	no hit
ss715580230	0.00011048	0.00011048	897	no hit
ss715580217	0.000110478	0.000110478	898	Glyma.01G187400	Glyma.01G187400.1 dsid=glyma.Wm82.gnm4.ann1.Glyma.01G187400.1 pacid=41116297 polypeptide=Glyma.01G187400.1.p locus=Glyma.01G187400 ID=Glyma.01G187400.1.Wm82.a4.v1 annot-version=Wm82.a4.v1	Glycine max	100	121	2.78×10-58	1
ss715579188	0.000110477	0.000110477	899	no hit
ss715579660	0.000110476	0.000110476	900	no hit
ss715578463	0.000110476	0.000110476	901	no hit
ss715579285	0.000110472	0.000110472	902	no hit
ss715579689	0.000110471	0.000110471	903	no hit
ss715579297	0.000110471	0.000110471	904	Glyma.05G031000	Glyma.05G031000.2 dsid=glyma.Wm82.gnm4.ann1.Glyma.05G031000.2 pacid=41143420 polypeptide=Glyma.05G031000.2.p locus=Glyma.05G031000 ID=Glyma.05G031000.2.Wm82.a4.v1 annot-version=Wm82.a4.v1	Glycine max	98	86	7.96×10-39	0.908
ss715578689	0.000110467	0.000110467	905	no hit
ss715578580	0.000110463	0.000110463	906	Glyma.16G170300	Glyma.16G170300.1 dsid=glyma.Wm82.gnm4.ann1.Glyma.16G170300.1 pacid=41079765 polypeptide=Glyma.16G170300.1.p locus=Glyma.16G170300 ID=Glyma.16G170300.1.Wm82.a4.v1 annot-version=Wm82.a4.v1	Glycine max	99	99	4.72×10-46	0.942
ss715579287	0.000110462	0.000110462	907	no hit
ss715580657	0.000110462	0.000110462	908	no hit
ss715578574	0.000110461	0.000110461	909	no hit
ss715580471	0.000110461	0.000110461	910	no hit
ss715579273	0.00011046	0.00011046	911	no hit
ss715578954	0.000110459	0.000110459	912	no hit
ss715583404	0.000110459	0.000110459	913	Glyma.02G004600	Glyma.02G004600.1 dsid=glyma.Wm82.gnm4.ann1.Glyma.02G004600.1 pacid=41098658 polypeptide=Glyma.02G004600.1.p locus=Glyma.02G004600 ID=Glyma.02G004600.1.Wm82.a4.v1 annot-version=Wm82.a4.v1	Glycine max	100	121	2.78×10-58	1
ss715579013	0.000110456	0.000110456	914	no hit
ss715581475	0.000110452	0.000110452	915	no hit
ss715580180	0.000110447	0.000110447	916	no hit
ss715578835	0.000110446	0.000110446	917	no hit
ss715580740	0.000110445	0.000110445	918	no hit
ss715579807	0.000110445	0.000110445	919	no hit
ss715580656	0.000110443	0.000110443	920	Glyma.01G234300	Glyma.01G234300.9 dsid=glyma.Wm82.gnm4.ann1.Glyma.01G234300.9 pacid=41115600 polypeptide=Glyma.01G234300.9.p locus=Glyma.01G234300 ID=Glyma.01G234300.9.Wm82.a4.v1 annot-version=Wm82.a4.v1	Glycine max	100	121	2.78×10-58	1
ss715579164	0.000110442	0.000110442	921	Glyma.01G035202	Glyma.01G035202.2 dsid=glyma.Wm82.gnm4.ann1.Glyma.01G035202.2 pacid=41117747 polypeptide=Glyma.01G035202.2.p locus=Glyma.01G035202 ID=Glyma.01G035202.2.Wm82.a4.v1 annot-version=Wm82.a4.v1	Glycine max	52	63	4.86×10-26	1
ss715578764	0.000110442	0.000110442	922	Glyma.01G080500	Glyma.01G080500.1 dsid=glyma.Wm82.gnm4.ann1.Glyma.01G080500.1 pacid=41117854 polypeptide=Glyma.01G080500.1.p locus=Glyma.01G080500 ID=Glyma.01G080500.1.Wm82.a4.v1 annot-version=Wm82.a4.v1	Glycine max	100	121	2.78×10-58	1
ss715578959	0.000110442	0.000110442	923	no hit
ss715579793	0.000110435	0.000110435	924	no hit
ss715578462	0.000110433	0.000110433	925	no hit
ss715581754	0.000110431	0.000110431	926	Glyma.01G033700	Glyma.01G033700.1 dsid=glyma.Wm82.gnm4.ann1.Glyma.01G033700.1 pacid=41114198 polypeptide=Glyma.01G033700.1.p locus=Glyma.01G033700 ID=Glyma.01G033700.1.Wm82.a4.v1 annot-version=Wm82.a4.v1	Glycine max	93	59	8.13×10-24	0.841
ss715579801	0.000110426	0.000110426	927	no hit
ss715580464	0.000110425	0.000110425	928	Glyma.01G216200	Glyma.01G216200.1 dsid=glyma.Wm82.gnm4.ann1.Glyma.01G216200.1 pacid=41116671 polypeptide=Glyma.01G216200.1.p locus=Glyma.01G216200 ID=Glyma.01G216200.1.Wm82.a4.v1 annot-version=Wm82.a4.v1	Glycine max	100	121	2.78×10-58	1
ss715579272	0.000110424	0.000110424	929	no hit
ss715578822	0.000110422	0.000110422	930	no hit
ss715580877	0.000110421	0.000110421	931	no hit
ss715580056	0.000110421	0.000110421	932	Glyma.01G171300	Glyma.01G171300.1 dsid=glyma.Wm82.gnm4.ann1.Glyma.01G171300.1 pacid=41115334 polypeptide=Glyma.01G171300.1.p locus=Glyma.01G171300 ID=Glyma.01G171300.1.Wm82.a4.v1 annot-version=Wm82.a4.v1	Glycine max	100	121	2.78×10-58	1
ss715580617	0.000110421	0.000110421	933	no hit
ss715580832	0.000110419	0.000110419	934	Glyma.01G061800	Glyma.01G061800.1 dsid=glyma.Wm82.gnm4.ann1.Glyma.01G061800.1 pacid=41116232 polypeptide=Glyma.01G061800.1.p locus=Glyma.01G061800 ID=Glyma.01G061800.1.Wm82.a4.v1 annot-version=Wm82.a4.v1	Glycine max	100	121	2.78×10-58	1
ss715579288	0.000110418	0.000110418	935	no hit
ss715580101	0.000110418	0.000110418	936	no hit
ss715579835	0.000110417	0.000110417	937	no hit
ss715580875	0.000110415	0.000110415	938	no hit
ss715578921	0.000110399	0.000110399	939	no hit
ss715579818	0.000110397	0.000110397	940	no hit
ss715578763	0.000110394	0.000110394	941	no hit
ss715579279	0.000110393	0.000110393	942	no hit
ss715580823	0.000110386	0.000110386	943	no hit
ss715579822	0.000110386	0.000110386	944	no hit
ss715580852	0.000110384	0.000110384	945	Glyma.01G063600	Glyma.01G063600.10 dsid=glyma.Wm82.gnm4.ann1.Glyma.01G063600.10 pacid=41117266 polypeptide=Glyma.01G063600.10.p locus=Glyma.01G063600 ID=Glyma.01G063600.10.Wm82.a4.v1 annot-version=Wm82.a4.v1	Glycine max	100	121	2.78×10-58	1
ss715579109	0.000110383	0.000110383	946	no hit
ss715578840	0.000110382	0.000110382	947	no hit
ss715580047	0.000110377	0.000110377	948	no hit
ss715578525	0.000110371	0.000110371	949	no hit
ss715579829	0.000110369	0.000110369	950	no hit
ss715580510	0.000110366	0.000110366	951	Glyma.11G022900	Glyma.11G022900.1 dsid=glyma.Wm82.gnm4.ann1.Glyma.11G022900.1 pacid=41130465 polypeptide=Glyma.11G022900.1.p locus=Glyma.11G022900 ID=Glyma.11G022900.1.Wm82.a4.v1 annot-version=Wm82.a4.v1	Glycine max	44	53	1.76×10-20	1
ss715579505	0.000110364	0.000110364	952	no hit
ss715580642	0.00011036	0.00011036	953	Glyma.01G233400	Glyma.01G233400.3 dsid=glyma.Wm82.gnm4.ann1.Glyma.01G233400.3 pacid=41117690 polypeptide=Glyma.01G233400.3.p locus=Glyma.01G233400 ID=Glyma.01G233400.3.Wm82.a4.v1 annot-version=Wm82.a4.v1	Glycine max	100	121	2.78×10-58	1
ss715580026	0.000110357	0.000110357	954	no hit
ss715578459	0.000110352	0.000110352	955	no hit
ss715579743	0.000110348	0.000110348	956	no hit
ss715578540	0.00011034	0.00011034	957	Glyma.01G015500	Glyma.01G015500.1 dsid=glyma.Wm82.gnm4.ann1.Glyma.01G015500.1 pacid=41117602 polypeptide=Glyma.01G015500.1.p locus=Glyma.01G015500 ID=Glyma.01G015500.1.Wm82.a4.v1 annot-version=Wm82.a4.v1	Glycine max	100	121	2.78×10-58	1
ss715578911	0.000110338	0.000110338	958	no hit
ss715579292	0.000110335	0.000110335	959	no hit
ss715580005	0.000110333	0.000110333	960	no hit
ss715580539	0.00011033	0.00011033	961	no hit
ss715580492	0.000110316	0.000110316	962	Glyma.01G218100	Glyma.01G218100.1 dsid=glyma.Wm82.gnm4.ann1.Glyma.01G218100.1 pacid=41115071 polypeptide=Glyma.01G218100.1.p locus=Glyma.01G218100 ID=Glyma.01G218100.1.Wm82.a4.v1 annot-version=Wm82.a4.v1	Glycine max	100	121	2.78×10-58	1
ss715579249	0.000110312	0.000110312	963	Glyma.01G036550	Glyma.01G036550.1 dsid=glyma.Wm82.gnm4.ann1.Glyma.01G036550.1 pacid=41117653 polypeptide=Glyma.01G036550.1.p locus=Glyma.01G036550 ID=Glyma.01G036550.1.Wm82.a4.v1 annot-version=Wm82.a4.v1	Glycine max	52	63	4.86×10-26	1
ss715578828	0.000110312	0.000110312	964	no hit
ss715580619	0.000110304	0.000110304	965	no hit
ss715580224	0.000110298	0.000110298	966	no hit
ss715578709	0.000110297	0.000110297	967	Glyma.01G021900	Glyma.01G021900.1 dsid=glyma.Wm82.gnm4.ann1.Glyma.01G021900.1 pacid=41115495 polypeptide=Glyma.01G021900.1.p locus=Glyma.01G021900 ID=Glyma.01G021900.1.Wm82.a4.v1 annot-version=Wm82.a4.v1	Glycine max	90	109	1.30×10-51	1
ss715579734	0.000110292	0.000110292	968	no hit
ss715578770	0.00011028	0.00011028	969	Glyma.01G023767	Glyma.01G023767.2 dsid=glyma.Wm82.gnm4.ann1.Glyma.01G023767.2 pacid=41115423 polypeptide=Glyma.01G023767.2.p locus=Glyma.01G023767 ID=Glyma.01G023767.2.Wm82.a4.v1 annot-version=Wm82.a4.v1	Glycine max	100	121	2.78×10-58	1
ss715581779	0.000110263	0.000110263	970	Glyma.20G048800	Glyma.20G048800.2 dsid=glyma.Wm82.gnm4.ann1.Glyma.20G048800.2 pacid=41090366 polypeptide=Glyma.20G048800.2.p locus=Glyma.20G048800 ID=Glyma.20G048800.2.Wm82.a4.v1 annot-version=Wm82.a4.v1	Glycine max	89	48	1.06×10-17	0.818
ss715579110	0.000110259	0.000110259	971	no hit
ss715580104	0.000110256	0.000110256	972	Glyma.01G175300	Glyma.01G175300.1 dsid=glyma.Wm82.gnm4.ann1.Glyma.01G175300.1 pacid=41115765 polypeptide=Glyma.01G175300.1.p locus=Glyma.01G175300 ID=Glyma.01G175300.1.Wm82.a4.v1 annot-version=Wm82.a4.v1	Glycine max	100	121	2.78×10-58	1
ss715579608	0.000110253	0.000110253	973	no hit
ss715578417	0.000110243	0.000110243	974	no hit
ss715579783	0.000110223	0.000110223	975	no hit
ss715579223	0.000110217	0.000110217	976	Glyma.03G063900	Glyma.03G063900.1 dsid=glyma.Wm82.gnm4.ann1.Glyma.03G063900.1 pacid=41156636 polypeptide=Glyma.03G063900.1.p locus=Glyma.03G063900 ID=Glyma.03G063900.1.Wm82.a4.v1 annot-version=Wm82.a4.v1	Glycine max	100	94	2.84×10-43	0.926
ss715581505	0.000110214	0.000110214	977	no hit
ss715579033	0.000110208	0.000110208	978	no hit
ss715579283	0.000110204	0.000110204	979	no hit
ss715584054	0.000110172	0.000110172	980	Glyma.19G220200	Glyma.19G220200.1 dsid=glyma.Wm82.gnm4.ann1.Glyma.19G220200.1 pacid=41164221 polypeptide=Glyma.19G220200.1.p locus=Glyma.19G220200 ID=Glyma.19G220200.1.Wm82.a4.v1 annot-version=Wm82.a4.v1	Glycine max	100	86	7.96×10-39	0.909
ss715580340	0.000110112	0.000110112	981	no hit
ss715579778	0.000110092	0.000110092	982	no hit
ss715580100	0.000110078	0.000110078	983	no hit
ss715579820	0.000110068	0.000110068	984	no hit
ss715578820	0.000110063	0.000110063	985	Glyma.01G025200	Glyma.01G025200.1 dsid=glyma.Wm82.gnm4.ann1.Glyma.01G025200.1 pacid=41114936 polypeptide=Glyma.01G025200.1.p locus=Glyma.01G025200 ID=Glyma.01G025200.1.Wm82.a4.v1 annot-version=Wm82.a4.v1	Glycine max	100	121	2.78×10-58	1
ss715580307	0.000109833	0.000109833	986	Glyma.01G193200	Glyma.01G193200.1 dsid=glyma.Wm82.gnm4.ann1.Glyma.01G193200.1 pacid=41116203 polypeptide=Glyma.01G193200.1.p locus=Glyma.01G193200 ID=Glyma.01G193200.1.Wm82.a4.v1 annot-version=Wm82.a4.v1	Glycine max	92	111	1.01×10-52	1
ss715579077	0.000109693	0.000109693	987	no hit
ss715580160	0.000109249	0.000109249	988	no hit
ss715578431	0.000109011	0.000109011	989	no hit
ss715579621	0.000108205	0.000108205	990	no hit
ss715580532	0.000108183	0.000108183	991	no hit
ss715578902	-0.000107625	0.000107625	992	no hit
ss715578752	0.000107431	0.000107431	993	no hit
ss715580248	0.000107253	0.000107253	994	no hit
ss715578436	0.000106811	0.000106811	995	no hit
ss715580237	0.000106439	0.000106439	996	no hit
ss715578890	0.000106201	0.000106201	997	no hit
ss715579065	-0.00010618	0.00010618	998	Glyma.01G032500	Glyma.01G032500.2 dsid=glyma.Wm82.gnm4.ann1.Glyma.01G032500.2 pacid=41116370 polypeptide=Glyma.01G032500.2.p locus=Glyma.01G032500 ID=Glyma.01G032500.2.Wm82.a4.v1 annot-version=Wm82.a4.v1	Glycine max	96	116	1.68×10-55	1
ss715578581	0.000105875	0.000105875	999	Glyma.01G017150	Glyma.01G017150.2 dsid=glyma.Wm82.gnm4.ann1.Glyma.01G017150.2 pacid=41116418 polypeptide=Glyma.01G017150.2.p locus=Glyma.01G017150 ID=Glyma.01G017150.2.Wm82.a4.v1 annot-version=Wm82.a4.v1	Glycine max	100	121	2.78×10-58	1
ss715581696	0.000105617	0.000105617	1000	no hit
ss715580159	0.000105616	0.000105616	1001	no hit
ss715581573	0.000105403	0.000105403	1002	no hit
ss715578516	0.000105299	0.000105299	1003	Glyma.18G199400	Glyma.18G199400.6 dsid=glyma.Wm82.gnm4.ann1.Glyma.18G199400.6 pacid=41166892 polypeptide=Glyma.18G199400.6.p locus=Glyma.18G199400 ID=Glyma.18G199400.6.Wm82.a4.v1 annot-version=Wm82.a4.v1	Glycine max	100	100	1.31×10-46	0.942
ss715578858	0.000105264	0.000105264	1004	Glyma.01G026200	Glyma.01G026200.1 dsid=glyma.Wm82.gnm4.ann1.Glyma.01G026200.1 pacid=41114722 polypeptide=Glyma.01G026200.1.p locus=Glyma.01G026200 ID=Glyma.01G026200.1.Wm82.a4.v1 annot-version=Wm82.a4.v1	Glycine max	94	114	2.17×10-54	1
ss715580879	0.000105234	0.000105234	1005	no hit
ss715580382	0.000105082	0.000105082	1006	no hit
ss715581560	0.000104891	0.000104891	1007	Glyma.02G026500	Glyma.02G026500.1 dsid=glyma.Wm82.gnm4.ann1.Glyma.02G026500.1 pacid=41097059 polypeptide=Glyma.02G026500.1.p locus=Glyma.02G026500 ID=Glyma.02G026500.1.Wm82.a4.v1 annot-version=Wm82.a4.v1	Glycine max	100	121	2.78×10-58	1
ss715579809	0.000104182	0.000104182	1008	no hit
ss715580413	0.000104112	0.000104112	1009	no hit
ss715578733	0.000104081	0.000104081	1010	no hit
ss715583872	0.000103938	0.000103938	1011	Glyma.02G006900	Glyma.02G006900.1 dsid=glyma.Wm82.gnm4.ann1.Glyma.02G006900.1 pacid=41096722 polypeptide=Glyma.02G006900.1.p locus=Glyma.02G006900 ID=Glyma.02G006900.1.Wm82.a4.v1 annot-version=Wm82.a4.v1	Glycine max	100	121	2.78×10-58	1
ss715581718	0.000103847	0.000103847	1012	no hit
ss715579414	0.000103085	0.000103085	1013	no hit
ss715583662	0.00010292	0.00010292	1014	no hit
ss715580182	0.000102827	0.000102827	1015	no hit
ss715578674	0.000102724	0.000102724	1016	no hit
ss715579310	0.000102662	0.000102662	1017	no hit
ss715583669	0.000102279	0.000102279	1018	no hit
ss715580152	0.000100948	0.000100948	1019	Glyma.01G180600	Glyma.01G180600.1 dsid=glyma.Wm82.gnm4.ann1.Glyma.01G180600.1 pacid=41117029 polypeptide=Glyma.01G180600.1.p locus=Glyma.01G180600 ID=Glyma.01G180600.1.Wm82.a4.v1 annot-version=Wm82.a4.v1	Glycine max	100	121	2.78×10-58	1
ss715578924	9.93551e-05	9.93551e-05	1020	no hit
ss715579038	-9.93324e-05	9.93324e-05	1021	no hit
ss715578633	9.90693e-05	9.90693e-05	1022	no hit
ss715580314	9.86381e-05	9.86381e-05	1023	no hit
ss715580187	9.83221e-05	9.83221e-05	1024	no hit
ss715578608	9.82835e-05	9.82835e-05	1025	no hit
ss715579375	9.80602e-05	9.80602e-05	1026	no hit
ss715580177	9.72574e-05	9.72574e-05	1027	no hit
ss715579302	9.66158e-05	9.66158e-05	1028	no hit
ss715579005	9.61771e-05	9.61771e-05	1029	no hit
ss715580623	9.59188e-05	9.59188e-05	1030	Glyma.01G231000	Glyma.01G231000.1 dsid=glyma.Wm82.gnm4.ann1.Glyma.01G231000.1 pacid=41116793 polypeptide=Glyma.01G231000.1.p locus=Glyma.01G231000 ID=Glyma.01G231000.1.Wm82.a4.v1 annot-version=Wm82.a4.v1	Glycine max	100	121	2.78×10-58	1
ss715580188	9.5537e-05	9.5537e-05	1031	no hit
ss715578815	9.46147e-05	9.46147e-05	1032	no hit
ss715580212	9.44027e-05	9.44027e-05	1033	no hit
ss715578799	9.40791e-05	9.40791e-05	1034	no hit
ss715578755	9.37317e-05	9.37317e-05	1035	Glyma.01G023600	Glyma.01G023600.1 dsid=glyma.Wm82.gnm4.ann1.Glyma.01G023600.1 pacid=41114604 polypeptide=Glyma.01G023600.1.p locus=Glyma.01G023600 ID=Glyma.01G023600.1.Wm82.a4.v1 annot-version=Wm82.a4.v1	Glycine max	82	99	4.72×10-46	1
ss715581657	9.34585e-05	9.34585e-05	1036	no hit
ss715578730	9.33847e-05	9.33847e-05	1037	no hit
ss715578787	9.32156e-05	9.32156e-05	1038	no hit
ss715578856	9.2875e-05	9.2875e-05	1039	Glyma.01G026200	Glyma.01G026200.1 dsid=glyma.Wm82.gnm4.ann1.Glyma.01G026200.1 pacid=41114722 polypeptide=Glyma.01G026200.1.p locus=Glyma.01G026200 ID=Glyma.01G026200.1.Wm82.a4.v1 annot-version=Wm82.a4.v1	Glycine max	33	40	2.97×10-13	1
ss715580330	9.28408e-05	9.28408e-05	1040	no hit
ss715579393	-9.26471e-05	9.26471e-05	1041	no hit
ss715579269	9.23836e-05	9.23836e-05	1042	no hit
ss715580379	9.23176e-05	9.23176e-05	1043	no hit
ss715578716	9.15971e-05	9.15971e-05	1044	no hit
ss715580018	9.15841e-05	9.15841e-05	1045	Glyma.11G075500	Glyma.11G075500.1 dsid=glyma.Wm82.gnm4.ann1.Glyma.11G075500.1 pacid=41127969 polypeptide=Glyma.11G075500.1.p locus=Glyma.11G075500 ID=Glyma.11G075500.1.Wm82.a4.v1 annot-version=Wm82.a4.v1	Glycine max	79	72	4.83×10-31	0.917
ss715580637	9.0732e-05	9.0732e-05	1046	no hit
ss715580035	9.05548e-05	9.05548e-05	1047	no hit
ss715581737	9.05244e-05	9.05244e-05	1048	no hit
ss715580629	9.04292e-05	9.04292e-05	1049	Glyma.01G231800	Glyma.01G231800.1 dsid=glyma.Wm82.gnm4.ann1.Glyma.01G231800.1 pacid=41114925 polypeptide=Glyma.01G231800.1.p locus=Glyma.01G231800 ID=Glyma.01G231800.1.Wm82.a4.v1 annot-version=Wm82.a4.v1	Glycine max	70	85	2.86×10-38	1
ss715578817	9.04061e-05	9.04061e-05	1050	no hit
ss715578842	9.02195e-05	9.02195e-05	1051	Glyma.01G025600	Glyma.01G025600.1 dsid=glyma.Wm82.gnm4.ann1.Glyma.01G025600.1 pacid=41115080 polypeptide=Glyma.01G025600.1.p locus=Glyma.01G025600 ID=Glyma.01G025600.1.Wm82.a4.v1 annot-version=Wm82.a4.v1	Glycine max	100	121	2.78×10-58	1
ss715581672	8.99076e-05	8.99076e-05	1052	Glyma.02G030000	Glyma.02G030000.1 dsid=glyma.Wm82.gnm4.ann1.Glyma.02G030000.1 pacid=41095422 polypeptide=Glyma.02G030000.1.p locus=Glyma.02G030000 ID=Glyma.02G030000.1.Wm82.a4.v1 annot-version=Wm82.a4.v1	Glycine max	90	109	1.30×10-51	1
ss715580170	8.98014e-05	8.98014e-05	1053	no hit
ss715580358	8.9291e-05	8.9291e-05	1054	Glyma.01G199600	Glyma.01G199600.1 dsid=glyma.Wm82.gnm4.ann1.Glyma.01G199600.1 pacid=41115742 polypeptide=Glyma.01G199600.1.p locus=Glyma.01G199600 ID=Glyma.01G199600.1.Wm82.a4.v1 annot-version=Wm82.a4.v1	Glycine max	100	121	2.78×10-58	1
ss715578427	8.87712e-05	8.87712e-05	1055	no hit
ss715580797	8.87353e-05	8.87353e-05	1056	no hit
ss715580514	8.84694e-05	8.84694e-05	1057	no hit
ss715580627	8.84238e-05	8.84238e-05	1058	no hit
ss715578527	8.83405e-05	8.83405e-05	1059	no hit
ss715580621	8.73434e-05	8.73434e-05	1060	Glyma.01G230850	Glyma.01G230850.1 dsid=glyma.Wm82.gnm4.ann1.Glyma.01G230850.1 pacid=41115571 polypeptide=Glyma.01G230850.1.p locus=Glyma.01G230850 ID=Glyma.01G230850.1.Wm82.a4.v1 annot-version=Wm82.a4.v1	Glycine max	72	87	2.21×10-39	1
ss715580023	8.71472e-05	8.71472e-05	1061	no hit
ss715580000	8.67951e-05	8.67951e-05	1062	no hit
ss715580331	8.62483e-05	8.62483e-05	1063	no hit
ss715578929	8.60393e-05	8.60393e-05	1064	no hit
ss715580166	8.55996e-05	8.55996e-05	1065	Glyma.01G182000	Glyma.01G182000.2 dsid=glyma.Wm82.gnm4.ann1.Glyma.01G182000.2 pacid=41117431 polypeptide=Glyma.01G182000.2.p locus=Glyma.01G182000 ID=Glyma.01G182000.2.Wm82.a4.v1 annot-version=Wm82.a4.v1	Glycine max	47	57	1.05×10-22	1
ss715580625	8.34185e-05	8.34185e-05	1066	no hit
ss715581640	8.33182e-05	8.33182e-05	1067	no hit
ss715580674	8.2812e-05	8.2812e-05	1068	no hit
ss715578768	8.26948e-05	8.26948e-05	1069	no hit
ss715579156	8.25785e-05	8.25785e-05	1070	Glyma.01G035000	Glyma.01G035000.3 dsid=glyma.Wm82.gnm4.ann1.Glyma.01G035000.3 pacid=41114580 polypeptide=Glyma.01G035000.3.p locus=Glyma.01G035000 ID=Glyma.01G035000.3.Wm82.a4.v1 annot-version=Wm82.a4.v1	Glycine max	41	50	8.19×10-19	1
ss715580653	8.21906e-05	8.21906e-05	1071	no hit
ss715578792	8.19346e-05	8.19346e-05	1072	no hit
ss715578848	8.16949e-05	8.16949e-05	1073	no hit
ss715580326	8.16098e-05	8.16098e-05	1074	no hit
ss715578882	8.14209e-05	8.14209e-05	1075	no hit
ss715579145	8.03316e-05	8.03316e-05	1076	Glyma.01G034800	Glyma.01G034800.6 dsid=glyma.Wm82.gnm4.ann1.Glyma.01G034800.6 pacid=41116899 polypeptide=Glyma.01G034800.6.p locus=Glyma.01G034800 ID=Glyma.01G034800.6.Wm82.a4.v1 annot-version=Wm82.a4.v1	Glycine max	36	44	1.77×10-15	1
ss715580254	8.01205e-05	8.01205e-05	1077	no hit
ss715580112	7.99412e-05	7.99412e-05	1078	no hit
ss715581426	7.98077e-05	7.98077e-05	1079	Glyma.09G229800	Glyma.09G229800.1 dsid=glyma.Wm82.gnm4.ann1.Glyma.09G229800.1 pacid=41134138 polypeptide=Glyma.09G229800.1.p locus=Glyma.09G229800 ID=Glyma.09G229800.1.Wm82.a4.v1 annot-version=Wm82.a4.v1	Glycine max	82	90	4.76×10-41	0.97
ss715578652	7.97826e-05	7.97826e-05	1080	no hit
ss715579723	7.97232e-05	7.97232e-05	1081	Glyma.14G062100	Glyma.14G062100.1 dsid=glyma.Wm82.gnm4.ann1.Glyma.14G062100.1 pacid=41148100 polypeptide=Glyma.14G062100.1.p locus=Glyma.14G062100 ID=Glyma.14G062100.1.Wm82.a4.v1 annot-version=Wm82.a4.v1	Glycine max	96	86	7.96×10-39	0.914
ss715579585	7.9062e-05	7.9062e-05	1082	no hit
ss715579998	7.86715e-05	7.86715e-05	1083	no hit
ss715579578	7.86583e-05	7.86583e-05	1084	no hit
ss715580704	7.78765e-05	7.78765e-05	1085	no hit
ss715580363	7.7855e-05	7.7855e-05	1086	no hit
ss715580028	7.70525e-05	7.70525e-05	1087	no hit
ss715580496	7.65491e-05	7.65491e-05	1088	no hit
ss715580646	7.58895e-05	7.58895e-05	1089	no hit
ss715580477	7.55539e-05	7.55539e-05	1090	no hit
ss715580303	7.55312e-05	7.55312e-05	1091	no hit
ss715579300	7.52658e-05	7.52658e-05	1092	no hit
ss715578803	7.50273e-05	7.50273e-05	1093	no hit
ss715580257	7.49468e-05	7.49468e-05	1094	Glyma.01G190600	Glyma.01G190600.1 dsid=glyma.Wm82.gnm4.ann1.Glyma.01G190600.1 pacid=41116084 polypeptide=Glyma.01G190600.1.p locus=Glyma.01G190600 ID=Glyma.01G190600.1.Wm82.a4.v1 annot-version=Wm82.a4.v1	Glycine max	45	54	4.89×10-21	1
ss715579993	7.49146e-05	7.49146e-05	1095	no hit
ss715580474	7.46844e-05	7.46844e-05	1096	no hit
ss715580504	7.35279e-05	7.35279e-05	1097	no hit
ss715580367	7.25723e-05	7.25723e-05	1098	no hit
ss715579839	-7.24637e-05	7.24637e-05	1099	Glyma.01G155000	Glyma.01G155000.1 dsid=glyma.Wm82.gnm4.ann1.Glyma.01G155000.1 pacid=41115735 polypeptide=Glyma.01G155000.1.p locus=Glyma.01G155000 ID=Glyma.01G155000.1.Wm82.a4.v1 annot-version=Wm82.a4.v1	Glycine max	100	121	2.78×10-58	1
ss715579327	-7.23368e-05	7.23368e-05	1100	no hit
ss715581751	7.17836e-05	7.17836e-05	1101	no hit
ss715578437	7.16114e-05	7.16114e-05	1102	no hit
ss715580842	7.12069e-05	7.12069e-05	1103	no hit
ss715578935	7.08647e-05	7.08647e-05	1104	no hit
ss715580515	7.07964e-05	7.07964e-05	1105	Glyma.01G220900	Glyma.01G220900.1 dsid=glyma.Wm82.gnm4.ann1.Glyma.01G220900.1 pacid=41117862 polypeptide=Glyma.01G220900.1.p locus=Glyma.01G220900 ID=Glyma.01G220900.1.Wm82.a4.v1 annot-version=Wm82.a4.v1	Glycine max	100	121	2.78×10-58	1
ss715580181	7.03309e-05	7.03309e-05	1106	no hit
ss715580696	6.99217e-05	6.99217e-05	1107	no hit
ss715579513	6.84235e-05	6.84235e-05	1108	no hit
ss715579089	6.75536e-05	6.75536e-05	1109	no hit
ss715580756	6.71791e-05	6.71791e-05	1110	no hit
ss715579882	6.68702e-05	6.68702e-05	1111	no hit
ss715578985	6.61823e-05	6.61823e-05	1112	no hit
ss715580022	6.61188e-05	6.61188e-05	1113	no hit
ss715580747	6.59846e-05	6.59846e-05	1114	no hit
ss715580142	6.48348e-05	6.48348e-05	1115	no hit
ss715582172	6.46487e-05	6.46487e-05	1116	no hit
ss715580209	6.40098e-05	6.40098e-05	1117	no hit
ss715580665	6.225e-05	6.225e-05	1118	Glyma.01G235000	Glyma.01G235000.1 dsid=glyma.Wm82.gnm4.ann1.Glyma.01G235000.1 pacid=41115331 polypeptide=Glyma.01G235000.1.p locus=Glyma.01G235000 ID=Glyma.01G235000.1.Wm82.a4.v1 annot-version=Wm82.a4.v1	Glycine max	100	121	2.78×10-58	1
ss715579217	6.15321e-05	6.15321e-05	1119	no hit
ss715580120	6.1207e-05	6.1207e-05	1120	no hit
ss715580546	6.06278e-05	6.06278e-05	1121	Glyma.01G223400	Glyma.01G223400.6 dsid=glyma.Wm82.gnm4.ann1.Glyma.01G223400.6 pacid=41117588 polypeptide=Glyma.01G223400.6.p locus=Glyma.01G223400 ID=Glyma.01G223400.6.Wm82.a4.v1 annot-version=Wm82.a4.v1	Glycine max	79	96	2.20×10-44	1
ss715579423	-6.04198e-05	6.04198e-05	1122	no hit
ss715580010	6.02857e-05	6.02857e-05	1123	Glyma.01G167200	Glyma.01G167200.1 dsid=glyma.Wm82.gnm4.ann1.Glyma.01G167200.1 pacid=41115656 polypeptide=Glyma.01G167200.1.p locus=Glyma.01G167200 ID=Glyma.01G167200.1.Wm82.a4.v1 annot-version=Wm82.a4.v1	Glycine max	60	72	4.83×10-31	1
ss715580638	6.02452e-05	6.02452e-05	1124	Glyma.01G233100	Glyma.01G233100.8 dsid=glyma.Wm82.gnm4.ann1.Glyma.01G233100.8 pacid=41114392 polypeptide=Glyma.01G233100.8.p locus=Glyma.01G233100 ID=Glyma.01G233100.8.Wm82.a4.v1 annot-version=Wm82.a4.v1	Glycine max	26	32	8.31×10-9	1
ss715581492	6.02243e-05	6.02243e-05	1125	no hit
ss715580263	6.00286e-05	6.00286e-05	1126	Glyma.01G191300	Glyma.01G191300.2 dsid=glyma.Wm82.gnm4.ann1.Glyma.01G191300.2 pacid=41115416 polypeptide=Glyma.01G191300.2.p locus=Glyma.01G191300 ID=Glyma.01G191300.2.Wm82.a4.v1 annot-version=Wm82.a4.v1	Glycine max	100	121	2.78×10-58	1
ss715580511	5.98775e-05	5.98775e-05	1127	no hit
ss715578493	-5.98551e-05	5.98551e-05	1128	no hit
ss715579143	-5.93214e-05	5.93214e-05	1129	no hit
ss715579162	5.90663e-05	5.90663e-05	1130	no hit
ss715580310	5.89675e-05	5.89675e-05	1131	Glyma.01G193500	Glyma.01G193500.1 dsid=glyma.Wm82.gnm4.ann1.Glyma.01G193500.1 pacid=41116324 polypeptide=Glyma.01G193500.1.p locus=Glyma.01G193500 ID=Glyma.01G193500.1.Wm82.a4.v1 annot-version=Wm82.a4.v1	Glycine max	100	121	2.78×10-58	1
ss715578997	5.80165e-05	5.80165e-05	1132	no hit
ss715583761	5.74494e-05	5.74494e-05	1133	Glyma.02G006100	Glyma.02G006100.1 dsid=glyma.Wm82.gnm4.ann1.Glyma.02G006100.1 pacid=41098579 polypeptide=Glyma.02G006100.1.p locus=Glyma.02G006100 ID=Glyma.02G006100.1.Wm82.a4.v1 annot-version=Wm82.a4.v1	Glycine max	100	121	2.78×10-58	1
ss715580660	5.70136e-05	5.70136e-05	1134	no hit
ss715579892	5.69803e-05	5.69803e-05	1135	no hit
ss715580008	5.64618e-05	5.64618e-05	1136	no hit
ss715578790	5.62059e-05	5.62059e-05	1137	Glyma.01G024600	Glyma.01G024600.1 dsid=glyma.Wm82.gnm4.ann1.Glyma.01G024600.1 pacid=41116789 polypeptide=Glyma.01G024600.1.p locus=Glyma.01G024600 ID=Glyma.01G024600.1.Wm82.a4.v1 annot-version=Wm82.a4.v1	Glycine max	100	121	2.78×10-58	1
ss715580208	-5.60871e-05	5.60871e-05	1138	Glyma.01G186600	Glyma.01G186600.1 dsid=glyma.Wm82.gnm4.ann1.Glyma.01G186600.1 pacid=41116636 polypeptide=Glyma.01G186600.1.p locus=Glyma.01G186600 ID=Glyma.01G186600.1.Wm82.a4.v1 annot-version=Wm82.a4.v1	Glycine max	85	103	2.82×10-48	1
ss715578441	5.54318e-05	5.54318e-05	1139	no hit
ss715580711	5.54235e-05	5.54235e-05	1140	no hit
ss715580613	5.52055e-05	5.52055e-05	1141	no hit
ss715578452	5.51658e-05	5.51658e-05	1142	no hit
ss715581502	-5.50647e-05	5.50647e-05	1143	no hit
ss715579011	5.3721e-05	5.3721e-05	1144	no hit
ss715580229	5.32448e-05	5.32448e-05	1145	no hit
ss715580323	5.32191e-05	5.32191e-05	1146	no hit
ss715579729	-5.31986e-05	5.31986e-05	1147	Glyma.01G148600	Glyma.01G148600.1 dsid=glyma.Wm82.gnm4.ann1.Glyma.01G148600.1 pacid=41117562 polypeptide=Glyma.01G148600.1.p locus=Glyma.01G148600 ID=Glyma.01G148600.1.Wm82.a4.v1 annot-version=Wm82.a4.v1	Glycine max	39	47	3.81×10-17	1
ss715580278	5.30146e-05	5.30146e-05	1148	no hit
ss715580388	5.28017e-05	5.28017e-05	1149	no hit
ss715579701	-5.22298e-05	5.22298e-05	1150	no hit
ss715579725	-5.20178e-05	5.20178e-05	1151	no hit
ss715578734	5.16122e-05	5.16122e-05	1152	no hit
ss715578731	5.15296e-05	5.15296e-05	1153	Glyma.01G022600	Glyma.01G022600.1 dsid=glyma.Wm82.gnm4.ann1.Glyma.01G022600.1 pacid=41115905 polypeptide=Glyma.01G022600.1.p locus=Glyma.01G022600 ID=Glyma.01G022600.1.Wm82.a4.v1 annot-version=Wm82.a4.v1	Glycine max	100	121	2.78×10-58	1
ss715580527	-5.14529e-05	5.14529e-05	1154	no hit
ss715579988	5.10871e-05	5.10871e-05	1155	no hit
ss715579963	5.09574e-05	5.09574e-05	1156	Glyma.01G164800	Glyma.01G164800.2 dsid=glyma.Wm82.gnm4.ann1.Glyma.01G164800.2 pacid=41114425 polypeptide=Glyma.01G164800.2.p locus=Glyma.01G164800 ID=Glyma.01G164800.2.Wm82.a4.v1 annot-version=Wm82.a4.v1	Glycine max	100	121	2.78×10-58	1
ss715578479	5.0888e-05	5.0888e-05	1157	no hit
ss715579598	-5.0586e-05	5.0586e-05	1158	no hit
ss715578465	5.0392e-05	5.0392e-05	1159	no hit
ss715580207	5.03613e-05	5.03613e-05	1160	no hit
ss715580703	5.01722e-05	5.01722e-05	1161	Glyma.01G241200	Glyma.01G241200.1 dsid=glyma.Wm82.gnm4.ann1.Glyma.01G241200.1 pacid=41117198 polypeptide=Glyma.01G241200.1.p locus=Glyma.01G241200 ID=Glyma.01G241200.1.Wm82.a4.v1 annot-version=Wm82.a4.v1	Glycine max	100	121	2.78×10-58	1
ss715578480	4.96569e-05	4.96569e-05	1162	no hit
ss715578401	4.9637e-05	4.9637e-05	1163	no hit
ss715579956	4.96332e-05	4.96332e-05	1164	no hit
ss715579897	4.94802e-05	4.94802e-05	1165	no hit
ss715578409	4.93136e-05	4.93136e-05	1166	no hit
ss715578704	4.88407e-05	4.88407e-05	1167	no hit
ss715580138	-4.87885e-05	4.87885e-05	1168	no hit
ss715580050	4.85051e-05	4.85051e-05	1169	no hit
ss715578926	4.84834e-05	4.84834e-05	1170	no hit
ss715580773	-4.80544e-05	4.80544e-05	1171	no hit
ss715580161	4.75473e-05	4.75473e-05	1172	Glyma.01G181600	Glyma.01G181600.1 dsid=glyma.Wm82.gnm4.ann1.Glyma.01G181600.1 pacid=41115820 polypeptide=Glyma.01G181600.1.p locus=Glyma.01G181600 ID=Glyma.01G181600.1.Wm82.a4.v1 annot-version=Wm82.a4.v1	Glycine max	56	68	8.07×10-29	1
ss715579654	4.73443e-05	4.73443e-05	1173	no hit
ss715579894	4.71512e-05	4.71512e-05	1174	no hit
ss715580275	4.69629e-05	4.69629e-05	1175	no hit
ss715579951	4.64945e-05	4.64945e-05	1176	no hit
ss715578467	4.62248e-05	4.62248e-05	1177	no hit
ss715580478	4.60751e-05	4.60751e-05	1178	no hit
ss715579947	4.5973e-05	4.5973e-05	1179	no hit
ss715579418	4.59496e-05	4.59496e-05	1180	Glyma.01G004100	Glyma.01G004100.7 dsid=glyma.Wm82.gnm4.ann1.Glyma.01G004100.7 pacid=41114209 polypeptide=Glyma.01G004100.7.p locus=Glyma.01G004100 ID=Glyma.01G004100.7.Wm82.a4.v1 annot-version=Wm82.a4.v1	Glycine max	100	121	2.78×10-58	1
ss715579193	4.50324e-05	4.50324e-05	1181	no hit
ss715581676	4.47916e-05	4.47916e-05	1182	no hit
ss715580759	-4.47549e-05	4.47549e-05	1183	no hit
ss715579362	4.46028e-05	4.46028e-05	1184	no hit
ss715583581	4.44135e-05	4.44135e-05	1185	Glyma.02G004800	Glyma.02G004800.1 dsid=glyma.Wm82.gnm4.ann1.Glyma.02G004800.1 pacid=41094363 polypeptide=Glyma.02G004800.1.p locus=Glyma.02G004800 ID=Glyma.02G004800.1.Wm82.a4.v1 annot-version=Wm82.a4.v1	Glycine max	33	40	2.97×10-13	1
ss715578875	4.42877e-05	4.42877e-05	1186	no hit
ss715578877	4.40104e-05	4.40104e-05	1187	no hit
ss715578838	4.37683e-05	4.37683e-05	1188	no hit
ss715580003	4.34755e-05	4.34755e-05	1189	no hit
ss715579451	4.30134e-05	4.30134e-05	1190	no hit
ss715580350	4.28847e-05	4.28847e-05	1191	no hit
ss715578845	4.28142e-05	4.28142e-05	1192	Glyma.01G025800	Glyma.01G025800.1 dsid=glyma.Wm82.gnm4.ann1.Glyma.01G025800.1 pacid=41115949 polypeptide=Glyma.01G025800.1.p locus=Glyma.01G025800 ID=Glyma.01G025800.1.Wm82.a4.v1 annot-version=Wm82.a4.v1	Glycine max	100	121	2.78×10-58	1
ss715580311	4.2274e-05	4.2274e-05	1193	no hit
ss715581746	4.21556e-05	4.21556e-05	1194	no hit
ss715579530	-4.19759e-05	4.19759e-05	1195	no hit
ss715581398	4.17729e-05	4.17729e-05	1196	no hit
ss715578586	4.16935e-05	4.16935e-05	1197	no hit
ss715580337	4.1266e-05	4.1266e-05	1198	no hit
ss715580631	4.1218e-05	4.1218e-05	1199	Glyma.01G232100	Glyma.01G232100.1 dsid=glyma.Wm82.gnm4.ann1.Glyma.01G232100.1 pacid=41115269 polypeptide=Glyma.01G232100.1.p locus=Glyma.01G232100 ID=Glyma.01G232100.1.Wm82.a4.v1 annot-version=Wm82.a4.v1	Glycine max	33	40	2.97×10-13	1
ss715579575	4.10789e-05	4.10789e-05	1200	no hit
ss715579064	4.09802e-05	4.09802e-05	1201	no hit
ss715578777	4.04862e-05	4.04862e-05	1202	Glyma.20G128900	Glyma.20G128900.1 dsid=glyma.Wm82.gnm4.ann1.Glyma.20G128900.1 pacid=41090387 polypeptide=Glyma.20G128900.1.p locus=Glyma.20G128900 ID=Glyma.20G128900.1.Wm82.a4.v1 annot-version=Wm82.a4.v1	Glycine max	100	104	7.85×10-49	0.952
