# Supplementary material for: Unveiling Optimal Models for Phenotype Prediction in Soybean Branching: An In-depth Examination of 11 Non-linear Regression Models, Highlighting SVR and SHAP Importance
Source: Research Square preprint supplement (doi:10.21203/rs.3.rs-3232751/v1), 2023-09-07
Supplement: Supplementary file 2 [file 6ad8ae252f7957da0fd43e58.xlsx]

## Sheet: positive gene distribution
Feature Names	Mean value	SHAP ABS	SHAP ranking	countif	gene	Similar sequences	Species	Query coverage (%)	Total score	E value	Identity (%)			chromosome		positive gene number
ss715579802	0.000788336	0.000788336	1	0	Glyma.01G153300	Glyma.01G153300.4 dsid=glyma.Wm82.gnm4.ann1.Glyma.01G153300.4 pacid=41114401 polypeptide=Glyma.01G153300.4.p locus=Glyma.01G153300 ID=Glyma.01G153300.4.Wm82.a4.v1 annot-version=Wm82.a4.v1	Glycine max	71	86	7.96×10-39	1			01G	148	74
ss715580868	0.000572971	0.000572971	21	0	Glyma.09G084700	Glyma.09G084700.1 dsid=glyma.Wm82.gnm4.ann1.Glyma.09G084700.1 pacid=41131898 polypeptide=Glyma.09G084700.1.p locus=Glyma.09G084700 ID=Glyma.09G084700.1.Wm82.a4.v1 annot-version=Wm82.a4.v1	Glycine max	68	70	6.24×10-30	0.951			02G	16	8
ss715579933	0.000553395	0.000553395	24	0	Glyma.01G161900	Glyma.01G161900.1 dsid=glyma.Wm82.gnm4.ann1.Glyma.01G161900.1 pacid=41115581 polypeptide=Glyma.01G161900.1.p locus=Glyma.01G161900 ID=Glyma.01G161900.1.Wm82.a4.v1 annot-version=Wm82.a4.v1	Glycine max	41	50	8.19×10-19	1			03G	2	1
ss715580335	0.000527791	0.000527791	28	0	Glyma.01G196300	Glyma.01G196300.1 dsid=glyma.Wm82.gnm4.ann1.Glyma.01G196300.1 pacid=41115426 polypeptide=Glyma.01G196300.1.p locus=Glyma.01G196300 ID=Glyma.01G196300.1.Wm82.a4.v1 annot-version=Wm82.a4.v1	Glycine max	44	53	1.76×10-20	1			04G	2	1
ss715579584	0.000527664	0.000527664	37	0	Glyma.01G005000	Glyma.01G005000.1 dsid=glyma.Wm82.gnm4.ann1.Glyma.01G005000.1 pacid=41116521 polypeptide=Glyma.01G005000.1.p locus=Glyma.01G005000 ID=Glyma.01G005000.1.Wm82.a4.v1 annot-version=Wm82.a4.v1	Glycine max	100	121	2.78×10-58	1			05G	2	1
ss715579937	0.00052766	0.00052766	39	0	Glyma.01G162600	Glyma.01G162600.1 dsid=glyma.Wm82.gnm4.ann1.Glyma.01G162600.1 pacid=41117948 polypeptide=Glyma.01G162600.1.p locus=Glyma.01G162600 ID=Glyma.01G162600.1.Wm82.a4.v1 annot-version=Wm82.a4.v1	Glycine max	88	107	1.69×10-50	1			06G	0	0
ss715579948	0.0005276	0.0005276	49	0	Glyma.01G164000	Glyma.01G164000.1 dsid=glyma.Wm82.gnm4.ann1.Glyma.01G164000.1 pacid=41117651 polypeptide=Glyma.01G164000.1.p locus=Glyma.01G164000 ID=Glyma.01G164000.1.Wm82.a4.v1 annot-version=Wm82.a4.v1	Glycine max	45	52	6.33×10-20	0.982			07G	0	0
ss715580644	0.000527538	0.000527538	58	1	Glyma.01G233500	Glyma.01G233500.1 dsid=glyma.Wm82.gnm4.ann1.Glyma.01G233500.1 pacid=41116729 polypeptide=Glyma.01G233500.1.p locus=Glyma.01G233500 ID=Glyma.01G233500.1.Wm82.a4.v1 annot-version=Wm82.a4.v1	Glycine max	39	47	3.81×10-17	1			08G	0	0
ss715578499	0.000527455	0.000527455	66	0	Glyma.01G014500	Glyma.01G014500.3 dsid=glyma.Wm82.gnm4.ann1.Glyma.01G014500.3 pacid=41117450 polypeptide=Glyma.01G014500.3.p locus=Glyma.01G014500 ID=Glyma.01G014500.3.Wm82.a4.v1 annot-version=Wm82.a4.v1	Glycine max	98	111	1.01×10-52	0.975			09G	4	2
ss715580352	0.000527454	0.000527454	67	0	Glyma.01G198900	Glyma.01G198900.1 dsid=glyma.Wm82.gnm4.ann1.Glyma.01G198900.1 pacid=41114463 polypeptide=Glyma.01G198900.1.p locus=Glyma.01G198900 ID=Glyma.01G198900.1.Wm82.a4.v1 annot-version=Wm82.a4.v1	Glycine max	100	121	2.78×10-58	1			10G	0	0
ss715578619	0.000465545	0.000465545	80	0	Glyma.01G018651	Glyma.01G018651.1 dsid=glyma.Wm82.gnm4.ann1.Glyma.01G018651.1 pacid=41116032 polypeptide=Glyma.01G018651.1.p locus=Glyma.01G018651 ID=Glyma.01G018651.1.Wm82.a4.v1 annot-version=Wm82.a4.v1	Glycine max	74	90	4.76×10-41	1			11G	4	2
ss715578604	0.000462686	0.000462686	82	0	Glyma.04G059600	Glyma.04G059600.1 dsid=glyma.Wm82.gnm4.ann1.Glyma.04G059600.1 pacid=41085082 polypeptide=Glyma.04G059600.1.p locus=Glyma.04G059600 ID=Glyma.04G059600.1.Wm82.a4.v1 annot-version=Wm82.a4.v1	Glycine max	23	28	1.39×10-6	1			12G	0	0
ss715580739	0.000459937	0.000459937	85	0	Glyma.01G005800	Glyma.01G005800.1 dsid=glyma.Wm82.gnm4.ann1.Glyma.01G005800.1 pacid=41115889 polypeptide=Glyma.01G005800.1.p locus=Glyma.01G005800 ID=Glyma.01G005800.1.Wm82.a4.v1 annot-version=Wm82.a4.v1	Glycine max	100	121	2.78×10-58	1			13G	0	0
ss715580344	0.00043113	0.00043113	107	0	Glyma.01G197600	Glyma.01G197600.2 dsid=glyma.Wm82.gnm4.ann1.Glyma.01G197600.2 pacid=41114889 polypeptide=Glyma.01G197600.2.p locus=Glyma.01G197600 ID=Glyma.01G197600.2.Wm82.a4.v1 annot-version=Wm82.a4.v1	Glycine max	100	121	2.78×10-58	1			14G	2	1
ss715581593	0.000428889	0.000428889	114	0	Glyma.02G027800	Glyma.02G027800.1 dsid=glyma.Wm82.gnm4.ann1.Glyma.02G027800.1 pacid=41096761 polypeptide=Glyma.02G027800.1.p locus=Glyma.02G027800 ID=Glyma.02G027800.1.Wm82.a4.v1 annot-version=Wm82.a4.v1	Glycine max	100	121	2.78×10-58	1			15G	0	0
ss715579357	0.000421376	0.000421376	133	0	Glyma.01G038400	Glyma.01G038400.1 dsid=glyma.Wm82.gnm4.ann1.Glyma.01G038400.1 pacid=41114210 polypeptide=Glyma.01G038400.1.p locus=Glyma.01G038400 ID=Glyma.01G038400.1.Wm82.a4.v1 annot-version=Wm82.a4.v1	Glycine max	74	89	1.71×10-40	1			16G	2	1
ss715580691	0.000369415	0.000369415	473	0	Glyma.01G239800	Glyma.01G239800.1 dsid=glyma.Wm82.gnm4.ann1.Glyma.01G239800.1 pacid=41117150 polypeptide=Glyma.01G239800.1.p locus=Glyma.01G239800 ID=Glyma.01G239800.1.Wm82.a4.v1 annot-version=Wm82.a4.v1	Glycine max	100	121	2.78×10-58	1			17G	0	0
ss715578946	0.000266974	0.000266974	508	0	Glyma.01G028800	Glyma.01G028800.1 dsid=glyma.Wm82.gnm4.ann1.Glyma.01G028800.1 pacid=41114267 polypeptide=Glyma.01G028800.1.p locus=Glyma.01G028800 ID=Glyma.01G028800.1.Wm82.a4.v1 annot-version=Wm82.a4.v1	Glycine max	100	121	2.78×10-58	1			18G	4	2
ss715580859	0.000266966	0.000266966	510	0	Glyma.01G009400	Glyma.01G009400.2 dsid=glyma.Wm82.gnm4.ann1.Glyma.01G009400.2 pacid=41117136 polypeptide=Glyma.01G009400.2.p locus=Glyma.01G009400 ID=Glyma.01G009400.2.Wm82.a4.v1 annot-version=Wm82.a4.v1	Glycine max	100	121	2.78×10-58	1			19G	4	2
ss715578558	0.000266882	0.000266882	522	0	Glyma.01G016300	Glyma.01G016300.2 dsid=glyma.Wm82.gnm4.ann1.Glyma.01G016300.2 pacid=41116991 polypeptide=Glyma.01G016300.2.p locus=Glyma.01G016300 ID=Glyma.01G016300.2.Wm82.a4.v1 annot-version=Wm82.a4.v1	Glycine max	83	101	3.65×10-47	1			20G	4	2
ss715580544	0.000263967	0.000263967	546	0	Glyma.01G223300	Glyma.01G223300.1 dsid=glyma.Wm82.gnm4.ann1.Glyma.01G223300.1 pacid=41116603 polypeptide=Glyma.01G223300.1.p locus=Glyma.01G223300 ID=Glyma.01G223300.1.Wm82.a4.v1 annot-version=Wm82.a4.v1	Glycine max	27	33	2.31×10-9	1
ss715578894	0.00016924	0.00016924	615	0	Glyma.01G001900	Glyma.01G001900.2 dsid=glyma.Wm82.gnm4.ann1.Glyma.01G001900.2 pacid=41115132 polypeptide=Glyma.01G001900.2.p locus=Glyma.01G001900 ID=Glyma.01G001900.2.Wm82.a4.v1 annot-version=Wm82.a4.v1	Glycine max	100	121	2.78×10-58	1
ss715580775	0.00011982	0.00011982	829	0	Glyma.01G007000	Glyma.01G007000.3 dsid=glyma.Wm82.gnm4.ann1.Glyma.01G007000.3 pacid=41116275 polypeptide=Glyma.01G007000.3.p locus=Glyma.01G007000 ID=Glyma.01G007000.3.Wm82.a4.v1 annot-version=Wm82.a4.v1	Glycine max	100	121	2.78×10-58	1
ss715578456	0.000111287	0.000111287	837	0	Glyma.01G013100	Glyma.01G013100.1 dsid=glyma.Wm82.gnm4.ann1.Glyma.01G013100.1 pacid=41116475 polypeptide=Glyma.01G013100.1.p locus=Glyma.01G013100 ID=Glyma.01G013100.1.Wm82.a4.v1 annot-version=Wm82.a4.v1	Glycine max	100	121	2.78×10-58	1
ss715579595	0.000110681	0.000110681	841	0	Glyma.01G042900	Glyma.01G042900.1 dsid=glyma.Wm82.gnm4.ann1.Glyma.01G042900.1 pacid=41115114 polypeptide=Glyma.01G042900.1.p locus=Glyma.01G042900 ID=Glyma.01G042900.1.Wm82.a4.v1 annot-version=Wm82.a4.v1	Glycine max	100	121	2.78×10-58	1
ss715579941	0.000110605	0.000110605	854	0	Glyma.01G163300	Glyma.01G163300.1 dsid=glyma.Wm82.gnm4.ann1.Glyma.01G163300.1 pacid=41116126 polypeptide=Glyma.01G163300.1.p locus=Glyma.01G163300 ID=Glyma.01G163300.1.Wm82.a4.v1 annot-version=Wm82.a4.v1	Glycine max	36	40	2.97×10-13	0.977
ss715578722	0.000110589	0.000110589	858	1	Glyma.01G022500	Glyma.01G022500.1 dsid=glyma.Wm82.gnm4.ann1.Glyma.01G022500.1 pacid=41116214 polypeptide=Glyma.01G022500.1.p locus=Glyma.01G022500 ID=Glyma.01G022500.1.Wm82.a4.v1 annot-version=Wm82.a4.v1	Glycine max	100	121	2.78×10-58	1
ss715581341	0.000110569	0.000110569	867	0	Glyma.02G017400	Glyma.02G017400.2 dsid=glyma.Wm82.gnm4.ann1.Glyma.02G017400.2 pacid=41096058 polypeptide=Glyma.02G017400.2.p locus=Glyma.02G017400 ID=Glyma.02G017400.2.Wm82.a4.v1 annot-version=Wm82.a4.v1	Glycine max	97	117	4.66×10-56	1
ss715580771	0.000110555	0.000110555	872	0	Glyma.18G074800	Glyma.18G074800.1 dsid=glyma.Wm82.gnm4.ann1.Glyma.18G074800.1 pacid=41165691 polypeptide=Glyma.18G074800.1.p locus=Glyma.18G074800 ID=Glyma.18G074800.1.Wm82.a4.v1 annot-version=Wm82.a4.v1	Glycine max	100	115	6.02×10-55	0.983
ss715578701	0.000110524	0.000110524	880	0	Glyma.01G021450	Glyma.01G021450.1 dsid=glyma.Wm82.gnm4.ann1.Glyma.01G021450.1 pacid=41115868 polypeptide=Glyma.01G021450.1.p locus=Glyma.01G021450 ID=Glyma.01G021450.1.Wm82.a4.v1 annot-version=Wm82.a4.v1	Glycine max	45	54	4.89×10-21	1
ss715578801	0.000110522	0.000110522	881	1	Glyma.01G025000	Glyma.01G025000.2 dsid=glyma.Wm82.gnm4.ann1.Glyma.01G025000.2 pacid=41116288 polypeptide=Glyma.01G025000.2.p locus=Glyma.01G025000 ID=Glyma.01G025000.2.Wm82.a4.v1 annot-version=Wm82.a4.v1	Glycine max	100	121	2.78×10-58	1
ss715580043	0.000110522	0.000110522	882	0	Glyma.01G169800	Glyma.01G169800.3 dsid=glyma.Wm82.gnm4.ann1.Glyma.01G169800.3 pacid=41117838 polypeptide=Glyma.01G169800.3.p locus=Glyma.01G169800 ID=Glyma.01G169800.3.Wm82.a4.v1 annot-version=Wm82.a4.v1	Glycine max	100	121	2.78×10-58	1
ss715580886	0.000110498	0.000110498	893	0	Glyma.19G258100	Glyma.19G258100.1 dsid=glyma.Wm82.gnm4.ann1.Glyma.19G258100.1 pacid=41162631 polypeptide=Glyma.19G258100.1.p locus=Glyma.19G258100 ID=Glyma.19G258100.1.Wm82.a4.v1 annot-version=Wm82.a4.v1	Glycine max	98	82	1.33×10-36	0.898
ss715580217	0.000110478	0.000110478	898	0	Glyma.01G187400	Glyma.01G187400.1 dsid=glyma.Wm82.gnm4.ann1.Glyma.01G187400.1 pacid=41116297 polypeptide=Glyma.01G187400.1.p locus=Glyma.01G187400 ID=Glyma.01G187400.1.Wm82.a4.v1 annot-version=Wm82.a4.v1	Glycine max	100	121	2.78×10-58	1
ss715579297	0.000110471	0.000110471	904	0	Glyma.05G031000	Glyma.05G031000.2 dsid=glyma.Wm82.gnm4.ann1.Glyma.05G031000.2 pacid=41143420 polypeptide=Glyma.05G031000.2.p locus=Glyma.05G031000 ID=Glyma.05G031000.2.Wm82.a4.v1 annot-version=Wm82.a4.v1	Glycine max	98	86	7.96×10-39	0.908
ss715578580	0.000110463	0.000110463	906	0	Glyma.16G170300	Glyma.16G170300.1 dsid=glyma.Wm82.gnm4.ann1.Glyma.16G170300.1 pacid=41079765 polypeptide=Glyma.16G170300.1.p locus=Glyma.16G170300 ID=Glyma.16G170300.1.Wm82.a4.v1 annot-version=Wm82.a4.v1	Glycine max	99	99	4.72×10-46	0.942
ss715583404	0.000110459	0.000110459	913	0	Glyma.02G004600	Glyma.02G004600.1 dsid=glyma.Wm82.gnm4.ann1.Glyma.02G004600.1 pacid=41098658 polypeptide=Glyma.02G004600.1.p locus=Glyma.02G004600 ID=Glyma.02G004600.1.Wm82.a4.v1 annot-version=Wm82.a4.v1	Glycine max	100	121	2.78×10-58	1
ss715580656	0.000110443	0.000110443	920	0	Glyma.01G234300	Glyma.01G234300.9 dsid=glyma.Wm82.gnm4.ann1.Glyma.01G234300.9 pacid=41115600 polypeptide=Glyma.01G234300.9.p locus=Glyma.01G234300 ID=Glyma.01G234300.9.Wm82.a4.v1 annot-version=Wm82.a4.v1	Glycine max	100	121	2.78×10-58	1
ss715579164	0.000110442	0.000110442	921	0	Glyma.01G035202	Glyma.01G035202.2 dsid=glyma.Wm82.gnm4.ann1.Glyma.01G035202.2 pacid=41117747 polypeptide=Glyma.01G035202.2.p locus=Glyma.01G035202 ID=Glyma.01G035202.2.Wm82.a4.v1 annot-version=Wm82.a4.v1	Glycine max	52	63	4.86×10-26	1
ss715578764	0.000110442	0.000110442	922	0	Glyma.01G080500	Glyma.01G080500.1 dsid=glyma.Wm82.gnm4.ann1.Glyma.01G080500.1 pacid=41117854 polypeptide=Glyma.01G080500.1.p locus=Glyma.01G080500 ID=Glyma.01G080500.1.Wm82.a4.v1 annot-version=Wm82.a4.v1	Glycine max	100	121	2.78×10-58	1
ss715581754	0.000110431	0.000110431	926	0	Glyma.01G033700	Glyma.01G033700.1 dsid=glyma.Wm82.gnm4.ann1.Glyma.01G033700.1 pacid=41114198 polypeptide=Glyma.01G033700.1.p locus=Glyma.01G033700 ID=Glyma.01G033700.1.Wm82.a4.v1 annot-version=Wm82.a4.v1	Glycine max	93	59	8.13×10-24	0.841
ss715580464	0.000110425	0.000110425	928	0	Glyma.01G216200	Glyma.01G216200.1 dsid=glyma.Wm82.gnm4.ann1.Glyma.01G216200.1 pacid=41116671 polypeptide=Glyma.01G216200.1.p locus=Glyma.01G216200 ID=Glyma.01G216200.1.Wm82.a4.v1 annot-version=Wm82.a4.v1	Glycine max	100	121	2.78×10-58	1
ss715580056	0.000110421	0.000110421	932	0	Glyma.01G171300	Glyma.01G171300.1 dsid=glyma.Wm82.gnm4.ann1.Glyma.01G171300.1 pacid=41115334 polypeptide=Glyma.01G171300.1.p locus=Glyma.01G171300 ID=Glyma.01G171300.1.Wm82.a4.v1 annot-version=Wm82.a4.v1	Glycine max	100	121	2.78×10-58	1
ss715580832	0.000110419	0.000110419	934	0	Glyma.01G061800	Glyma.01G061800.1 dsid=glyma.Wm82.gnm4.ann1.Glyma.01G061800.1 pacid=41116232 polypeptide=Glyma.01G061800.1.p locus=Glyma.01G061800 ID=Glyma.01G061800.1.Wm82.a4.v1 annot-version=Wm82.a4.v1	Glycine max	100	121	2.78×10-58	1
ss715580852	0.000110384	0.000110384	945	0	Glyma.01G063600	Glyma.01G063600.10 dsid=glyma.Wm82.gnm4.ann1.Glyma.01G063600.10 pacid=41117266 polypeptide=Glyma.01G063600.10.p locus=Glyma.01G063600 ID=Glyma.01G063600.10.Wm82.a4.v1 annot-version=Wm82.a4.v1	Glycine max	100	121	2.78×10-58	1
ss715580510	0.000110366	0.000110366	951	0	Glyma.11G022900	Glyma.11G022900.1 dsid=glyma.Wm82.gnm4.ann1.Glyma.11G022900.1 pacid=41130465 polypeptide=Glyma.11G022900.1.p locus=Glyma.11G022900 ID=Glyma.11G022900.1.Wm82.a4.v1 annot-version=Wm82.a4.v1	Glycine max	44	53	1.76×10-20	1
ss715580642	0.00011036	0.00011036	953	0	Glyma.01G233400	Glyma.01G233400.3 dsid=glyma.Wm82.gnm4.ann1.Glyma.01G233400.3 pacid=41117690 polypeptide=Glyma.01G233400.3.p locus=Glyma.01G233400 ID=Glyma.01G233400.3.Wm82.a4.v1 annot-version=Wm82.a4.v1	Glycine max	100	121	2.78×10-58	1
ss715578540	0.00011034	0.00011034	957	0	Glyma.01G015500	Glyma.01G015500.1 dsid=glyma.Wm82.gnm4.ann1.Glyma.01G015500.1 pacid=41117602 polypeptide=Glyma.01G015500.1.p locus=Glyma.01G015500 ID=Glyma.01G015500.1.Wm82.a4.v1 annot-version=Wm82.a4.v1	Glycine max	100	121	2.78×10-58	1
ss715580492	0.000110316	0.000110316	962	0	Glyma.01G218100	Glyma.01G218100.1 dsid=glyma.Wm82.gnm4.ann1.Glyma.01G218100.1 pacid=41115071 polypeptide=Glyma.01G218100.1.p locus=Glyma.01G218100 ID=Glyma.01G218100.1.Wm82.a4.v1 annot-version=Wm82.a4.v1	Glycine max	100	121	2.78×10-58	1
ss715579249	0.000110312	0.000110312	963	0	Glyma.01G036550	Glyma.01G036550.1 dsid=glyma.Wm82.gnm4.ann1.Glyma.01G036550.1 pacid=41117653 polypeptide=Glyma.01G036550.1.p locus=Glyma.01G036550 ID=Glyma.01G036550.1.Wm82.a4.v1 annot-version=Wm82.a4.v1	Glycine max	52	63	4.86×10-26	1
ss715578709	0.000110297	0.000110297	967	0	Glyma.01G021900	Glyma.01G021900.1 dsid=glyma.Wm82.gnm4.ann1.Glyma.01G021900.1 pacid=41115495 polypeptide=Glyma.01G021900.1.p locus=Glyma.01G021900 ID=Glyma.01G021900.1.Wm82.a4.v1 annot-version=Wm82.a4.v1	Glycine max	90	109	1.30×10-51	1
ss715578770	0.00011028	0.00011028	969	0	Glyma.01G023767	Glyma.01G023767.2 dsid=glyma.Wm82.gnm4.ann1.Glyma.01G023767.2 pacid=41115423 polypeptide=Glyma.01G023767.2.p locus=Glyma.01G023767 ID=Glyma.01G023767.2.Wm82.a4.v1 annot-version=Wm82.a4.v1	Glycine max	100	121	2.78×10-58	1
ss715581779	0.000110263	0.000110263	970	0	Glyma.20G048800	Glyma.20G048800.2 dsid=glyma.Wm82.gnm4.ann1.Glyma.20G048800.2 pacid=41090366 polypeptide=Glyma.20G048800.2.p locus=Glyma.20G048800 ID=Glyma.20G048800.2.Wm82.a4.v1 annot-version=Wm82.a4.v1	Glycine max	89	48	1.06×10-17	0.818
ss715580104	0.000110256	0.000110256	972	1	Glyma.01G175300	Glyma.01G175300.1 dsid=glyma.Wm82.gnm4.ann1.Glyma.01G175300.1 pacid=41115765 polypeptide=Glyma.01G175300.1.p locus=Glyma.01G175300 ID=Glyma.01G175300.1.Wm82.a4.v1 annot-version=Wm82.a4.v1	Glycine max	100	121	2.78×10-58	1
ss715579223	0.000110217	0.000110217	976	0	Glyma.03G063900	Glyma.03G063900.1 dsid=glyma.Wm82.gnm4.ann1.Glyma.03G063900.1 pacid=41156636 polypeptide=Glyma.03G063900.1.p locus=Glyma.03G063900 ID=Glyma.03G063900.1.Wm82.a4.v1 annot-version=Wm82.a4.v1	Glycine max	100	94	2.84×10-43	0.926
ss715584054	0.000110172	0.000110172	980	0	Glyma.19G220200	Glyma.19G220200.1 dsid=glyma.Wm82.gnm4.ann1.Glyma.19G220200.1 pacid=41164221 polypeptide=Glyma.19G220200.1.p locus=Glyma.19G220200 ID=Glyma.19G220200.1.Wm82.a4.v1 annot-version=Wm82.a4.v1	Glycine max	100	86	7.96×10-39	0.909
ss715578820	0.000110063	0.000110063	985	0	Glyma.01G025200	Glyma.01G025200.1 dsid=glyma.Wm82.gnm4.ann1.Glyma.01G025200.1 pacid=41114936 polypeptide=Glyma.01G025200.1.p locus=Glyma.01G025200 ID=Glyma.01G025200.1.Wm82.a4.v1 annot-version=Wm82.a4.v1	Glycine max	100	121	2.78×10-58	1
ss715580307	0.000109833	0.000109833	986	0	Glyma.01G193200	Glyma.01G193200.1 dsid=glyma.Wm82.gnm4.ann1.Glyma.01G193200.1 pacid=41116203 polypeptide=Glyma.01G193200.1.p locus=Glyma.01G193200 ID=Glyma.01G193200.1.Wm82.a4.v1 annot-version=Wm82.a4.v1	Glycine max	92	111	1.01×10-52	1
ss715578581	0.000105875	0.000105875	999	0	Glyma.01G017150	Glyma.01G017150.2 dsid=glyma.Wm82.gnm4.ann1.Glyma.01G017150.2 pacid=41116418 polypeptide=Glyma.01G017150.2.p locus=Glyma.01G017150 ID=Glyma.01G017150.2.Wm82.a4.v1 annot-version=Wm82.a4.v1	Glycine max	100	121	2.78×10-58	1
ss715578516	0.000105299	0.000105299	1003	0	Glyma.18G199400	Glyma.18G199400.6 dsid=glyma.Wm82.gnm4.ann1.Glyma.18G199400.6 pacid=41166892 polypeptide=Glyma.18G199400.6.p locus=Glyma.18G199400 ID=Glyma.18G199400.6.Wm82.a4.v1 annot-version=Wm82.a4.v1	Glycine max	100	100	1.31×10-46	0.942
ss715578858	0.000105264	0.000105264	1004	0	Glyma.01G026200	Glyma.01G026200.1 dsid=glyma.Wm82.gnm4.ann1.Glyma.01G026200.1 pacid=41114722 polypeptide=Glyma.01G026200.1.p locus=Glyma.01G026200 ID=Glyma.01G026200.1.Wm82.a4.v1 annot-version=Wm82.a4.v1	Glycine max	94	114	2.17×10-54	1
ss715581560	0.000104891	0.000104891	1007	0	Glyma.02G026500	Glyma.02G026500.1 dsid=glyma.Wm82.gnm4.ann1.Glyma.02G026500.1 pacid=41097059 polypeptide=Glyma.02G026500.1.p locus=Glyma.02G026500 ID=Glyma.02G026500.1.Wm82.a4.v1 annot-version=Wm82.a4.v1	Glycine max	100	121	2.78×10-58	1
ss715583872	0.000103938	0.000103938	1011	0	Glyma.02G006900	Glyma.02G006900.1 dsid=glyma.Wm82.gnm4.ann1.Glyma.02G006900.1 pacid=41096722 polypeptide=Glyma.02G006900.1.p locus=Glyma.02G006900 ID=Glyma.02G006900.1.Wm82.a4.v1 annot-version=Wm82.a4.v1	Glycine max	100	121	2.78×10-58	1
ss715580152	0.000100948	0.000100948	1019	0	Glyma.01G180600	Glyma.01G180600.1 dsid=glyma.Wm82.gnm4.ann1.Glyma.01G180600.1 pacid=41117029 polypeptide=Glyma.01G180600.1.p locus=Glyma.01G180600 ID=Glyma.01G180600.1.Wm82.a4.v1 annot-version=Wm82.a4.v1	Glycine max	100	121	2.78×10-58	1
ss715580623	9.59188e-05	9.59188e-05	1030	0	Glyma.01G231000	Glyma.01G231000.1 dsid=glyma.Wm82.gnm4.ann1.Glyma.01G231000.1 pacid=41116793 polypeptide=Glyma.01G231000.1.p locus=Glyma.01G231000 ID=Glyma.01G231000.1.Wm82.a4.v1 annot-version=Wm82.a4.v1	Glycine max	100	121	2.78×10-58	1
ss715578755	9.37317e-05	9.37317e-05	1035	0	Glyma.01G023600	Glyma.01G023600.1 dsid=glyma.Wm82.gnm4.ann1.Glyma.01G023600.1 pacid=41114604 polypeptide=Glyma.01G023600.1.p locus=Glyma.01G023600 ID=Glyma.01G023600.1.Wm82.a4.v1 annot-version=Wm82.a4.v1	Glycine max	82	99	4.72×10-46	1
ss715578856	9.2875e-05	9.2875e-05	1039	0	Glyma.01G026200	Glyma.01G026200.1 dsid=glyma.Wm82.gnm4.ann1.Glyma.01G026200.1 pacid=41114722 polypeptide=Glyma.01G026200.1.p locus=Glyma.01G026200 ID=Glyma.01G026200.1.Wm82.a4.v1 annot-version=Wm82.a4.v1	Glycine max	33	40	2.97×10-13	1
ss715580018	9.15841e-05	9.15841e-05	1045	0	Glyma.11G075500	Glyma.11G075500.1 dsid=glyma.Wm82.gnm4.ann1.Glyma.11G075500.1 pacid=41127969 polypeptide=Glyma.11G075500.1.p locus=Glyma.11G075500 ID=Glyma.11G075500.1.Wm82.a4.v1 annot-version=Wm82.a4.v1	Glycine max	79	72	4.83×10-31	0.917
ss715580629	9.04292e-05	9.04292e-05	1049	0	Glyma.01G231800	Glyma.01G231800.1 dsid=glyma.Wm82.gnm4.ann1.Glyma.01G231800.1 pacid=41114925 polypeptide=Glyma.01G231800.1.p locus=Glyma.01G231800 ID=Glyma.01G231800.1.Wm82.a4.v1 annot-version=Wm82.a4.v1	Glycine max	70	85	2.86×10-38	1
ss715578842	9.02195e-05	9.02195e-05	1051	0	Glyma.01G025600	Glyma.01G025600.1 dsid=glyma.Wm82.gnm4.ann1.Glyma.01G025600.1 pacid=41115080 polypeptide=Glyma.01G025600.1.p locus=Glyma.01G025600 ID=Glyma.01G025600.1.Wm82.a4.v1 annot-version=Wm82.a4.v1	Glycine max	100	121	2.78×10-58	1
ss715581672	8.99076e-05	8.99076e-05	1052	0	Glyma.02G030000	Glyma.02G030000.1 dsid=glyma.Wm82.gnm4.ann1.Glyma.02G030000.1 pacid=41095422 polypeptide=Glyma.02G030000.1.p locus=Glyma.02G030000 ID=Glyma.02G030000.1.Wm82.a4.v1 annot-version=Wm82.a4.v1	Glycine max	90	109	1.30×10-51	1
ss715580358	8.9291e-05	8.9291e-05	1054	0	Glyma.01G199600	Glyma.01G199600.1 dsid=glyma.Wm82.gnm4.ann1.Glyma.01G199600.1 pacid=41115742 polypeptide=Glyma.01G199600.1.p locus=Glyma.01G199600 ID=Glyma.01G199600.1.Wm82.a4.v1 annot-version=Wm82.a4.v1	Glycine max	100	121	2.78×10-58	1
ss715580621	8.73434e-05	8.73434e-05	1060	0	Glyma.01G230850	Glyma.01G230850.1 dsid=glyma.Wm82.gnm4.ann1.Glyma.01G230850.1 pacid=41115571 polypeptide=Glyma.01G230850.1.p locus=Glyma.01G230850 ID=Glyma.01G230850.1.Wm82.a4.v1 annot-version=Wm82.a4.v1	Glycine max	72	87	2.21×10-39	1
ss715580166	8.55996e-05	8.55996e-05	1065	0	Glyma.01G182000	Glyma.01G182000.2 dsid=glyma.Wm82.gnm4.ann1.Glyma.01G182000.2 pacid=41117431 polypeptide=Glyma.01G182000.2.p locus=Glyma.01G182000 ID=Glyma.01G182000.2.Wm82.a4.v1 annot-version=Wm82.a4.v1	Glycine max	47	57	1.05×10-22	1
ss715579156	8.25785e-05	8.25785e-05	1070	0	Glyma.01G035000	Glyma.01G035000.3 dsid=glyma.Wm82.gnm4.ann1.Glyma.01G035000.3 pacid=41114580 polypeptide=Glyma.01G035000.3.p locus=Glyma.01G035000 ID=Glyma.01G035000.3.Wm82.a4.v1 annot-version=Wm82.a4.v1	Glycine max	41	50	8.19×10-19	1
ss715579145	8.03316e-05	8.03316e-05	1076	0	Glyma.01G034800	Glyma.01G034800.6 dsid=glyma.Wm82.gnm4.ann1.Glyma.01G034800.6 pacid=41116899 polypeptide=Glyma.01G034800.6.p locus=Glyma.01G034800 ID=Glyma.01G034800.6.Wm82.a4.v1 annot-version=Wm82.a4.v1	Glycine max	36	44	1.77×10-15	1
ss715581426	7.98077e-05	7.98077e-05	1079	0	Glyma.09G229800	Glyma.09G229800.1 dsid=glyma.Wm82.gnm4.ann1.Glyma.09G229800.1 pacid=41134138 polypeptide=Glyma.09G229800.1.p locus=Glyma.09G229800 ID=Glyma.09G229800.1.Wm82.a4.v1 annot-version=Wm82.a4.v1	Glycine max	82	90	4.76×10-41	0.97
ss715579723	7.97232e-05	7.97232e-05	1081	0	Glyma.14G062100	Glyma.14G062100.1 dsid=glyma.Wm82.gnm4.ann1.Glyma.14G062100.1 pacid=41148100 polypeptide=Glyma.14G062100.1.p locus=Glyma.14G062100 ID=Glyma.14G062100.1.Wm82.a4.v1 annot-version=Wm82.a4.v1	Glycine max	96	86	7.96×10-39	0.914
ss715580257	7.49468e-05	7.49468e-05	1094	0	Glyma.01G190600	Glyma.01G190600.1 dsid=glyma.Wm82.gnm4.ann1.Glyma.01G190600.1 pacid=41116084 polypeptide=Glyma.01G190600.1.p locus=Glyma.01G190600 ID=Glyma.01G190600.1.Wm82.a4.v1 annot-version=Wm82.a4.v1	Glycine max	45	54	4.89×10-21	1
ss715580515	7.07964e-05	7.07964e-05	1105	0	Glyma.01G220900	Glyma.01G220900.1 dsid=glyma.Wm82.gnm4.ann1.Glyma.01G220900.1 pacid=41117862 polypeptide=Glyma.01G220900.1.p locus=Glyma.01G220900 ID=Glyma.01G220900.1.Wm82.a4.v1 annot-version=Wm82.a4.v1	Glycine max	100	121	2.78×10-58	1
ss715580665	6.225e-05	6.225e-05	1118	0	Glyma.01G235000	Glyma.01G235000.1 dsid=glyma.Wm82.gnm4.ann1.Glyma.01G235000.1 pacid=41115331 polypeptide=Glyma.01G235000.1.p locus=Glyma.01G235000 ID=Glyma.01G235000.1.Wm82.a4.v1 annot-version=Wm82.a4.v1	Glycine max	100	121	2.78×10-58	1
ss715580546	6.06278e-05	6.06278e-05	1121	1	Glyma.01G223400	Glyma.01G223400.6 dsid=glyma.Wm82.gnm4.ann1.Glyma.01G223400.6 pacid=41117588 polypeptide=Glyma.01G223400.6.p locus=Glyma.01G223400 ID=Glyma.01G223400.6.Wm82.a4.v1 annot-version=Wm82.a4.v1	Glycine max	79	96	2.20×10-44	1
ss715580010	6.02857e-05	6.02857e-05	1123	0	Glyma.01G167200	Glyma.01G167200.1 dsid=glyma.Wm82.gnm4.ann1.Glyma.01G167200.1 pacid=41115656 polypeptide=Glyma.01G167200.1.p locus=Glyma.01G167200 ID=Glyma.01G167200.1.Wm82.a4.v1 annot-version=Wm82.a4.v1	Glycine max	60	72	4.83×10-31	1
ss715580638	6.02452e-05	6.02452e-05	1124	0	Glyma.01G233100	Glyma.01G233100.8 dsid=glyma.Wm82.gnm4.ann1.Glyma.01G233100.8 pacid=41114392 polypeptide=Glyma.01G233100.8.p locus=Glyma.01G233100 ID=Glyma.01G233100.8.Wm82.a4.v1 annot-version=Wm82.a4.v1	Glycine max	26	32	8.31×10-9	1
ss715580263	6.00286e-05	6.00286e-05	1126	0	Glyma.01G191300	Glyma.01G191300.2 dsid=glyma.Wm82.gnm4.ann1.Glyma.01G191300.2 pacid=41115416 polypeptide=Glyma.01G191300.2.p locus=Glyma.01G191300 ID=Glyma.01G191300.2.Wm82.a4.v1 annot-version=Wm82.a4.v1	Glycine max	100	121	2.78×10-58	1
ss715580310	5.89675e-05	5.89675e-05	1131	0	Glyma.01G193500	Glyma.01G193500.1 dsid=glyma.Wm82.gnm4.ann1.Glyma.01G193500.1 pacid=41116324 polypeptide=Glyma.01G193500.1.p locus=Glyma.01G193500 ID=Glyma.01G193500.1.Wm82.a4.v1 annot-version=Wm82.a4.v1	Glycine max	100	121	2.78×10-58	1
ss715583761	5.74494e-05	5.74494e-05	1133	0	Glyma.02G006100	Glyma.02G006100.1 dsid=glyma.Wm82.gnm4.ann1.Glyma.02G006100.1 pacid=41098579 polypeptide=Glyma.02G006100.1.p locus=Glyma.02G006100 ID=Glyma.02G006100.1.Wm82.a4.v1 annot-version=Wm82.a4.v1	Glycine max	100	121	2.78×10-58	1
ss715578790	5.62059e-05	5.62059e-05	1137	0	Glyma.01G024600	Glyma.01G024600.1 dsid=glyma.Wm82.gnm4.ann1.Glyma.01G024600.1 pacid=41116789 polypeptide=Glyma.01G024600.1.p locus=Glyma.01G024600 ID=Glyma.01G024600.1.Wm82.a4.v1 annot-version=Wm82.a4.v1	Glycine max	100	121	2.78×10-58	1
ss715578731	5.15296e-05	5.15296e-05	1153	0	Glyma.01G022600	Glyma.01G022600.1 dsid=glyma.Wm82.gnm4.ann1.Glyma.01G022600.1 pacid=41115905 polypeptide=Glyma.01G022600.1.p locus=Glyma.01G022600 ID=Glyma.01G022600.1.Wm82.a4.v1 annot-version=Wm82.a4.v1	Glycine max	100	121	2.78×10-58	1
ss715579963	5.09574e-05	5.09574e-05	1156	0	Glyma.01G164800	Glyma.01G164800.2 dsid=glyma.Wm82.gnm4.ann1.Glyma.01G164800.2 pacid=41114425 polypeptide=Glyma.01G164800.2.p locus=Glyma.01G164800 ID=Glyma.01G164800.2.Wm82.a4.v1 annot-version=Wm82.a4.v1	Glycine max	100	121	2.78×10-58	1
ss715580703	5.01722e-05	5.01722e-05	1161	0	Glyma.01G241200	Glyma.01G241200.1 dsid=glyma.Wm82.gnm4.ann1.Glyma.01G241200.1 pacid=41117198 polypeptide=Glyma.01G241200.1.p locus=Glyma.01G241200 ID=Glyma.01G241200.1.Wm82.a4.v1 annot-version=Wm82.a4.v1	Glycine max	100	121	2.78×10-58	1
ss715580161	4.75473e-05	4.75473e-05	1172	0	Glyma.01G181600	Glyma.01G181600.1 dsid=glyma.Wm82.gnm4.ann1.Glyma.01G181600.1 pacid=41115820 polypeptide=Glyma.01G181600.1.p locus=Glyma.01G181600 ID=Glyma.01G181600.1.Wm82.a4.v1 annot-version=Wm82.a4.v1	Glycine max	56	68	8.07×10-29	1
ss715579418	4.59496e-05	4.59496e-05	1180	0	Glyma.01G004100	Glyma.01G004100.7 dsid=glyma.Wm82.gnm4.ann1.Glyma.01G004100.7 pacid=41114209 polypeptide=Glyma.01G004100.7.p locus=Glyma.01G004100 ID=Glyma.01G004100.7.Wm82.a4.v1 annot-version=Wm82.a4.v1	Glycine max	100	121	2.78×10-58	1
ss715583581	4.44135e-05	4.44135e-05	1185	0	Glyma.02G004800	Glyma.02G004800.1 dsid=glyma.Wm82.gnm4.ann1.Glyma.02G004800.1 pacid=41094363 polypeptide=Glyma.02G004800.1.p locus=Glyma.02G004800 ID=Glyma.02G004800.1.Wm82.a4.v1 annot-version=Wm82.a4.v1	Glycine max	33	40	2.97×10-13	1
ss715578845	4.28142e-05	4.28142e-05	1192	0	Glyma.01G025800	Glyma.01G025800.1 dsid=glyma.Wm82.gnm4.ann1.Glyma.01G025800.1 pacid=41115949 polypeptide=Glyma.01G025800.1.p locus=Glyma.01G025800 ID=Glyma.01G025800.1.Wm82.a4.v1 annot-version=Wm82.a4.v1	Glycine max	100	121	2.78×10-58	1
ss715580631	4.1218e-05	4.1218e-05	1199	0	Glyma.01G232100	Glyma.01G232100.1 dsid=glyma.Wm82.gnm4.ann1.Glyma.01G232100.1 pacid=41115269 polypeptide=Glyma.01G232100.1.p locus=Glyma.01G232100 ID=Glyma.01G232100.1.Wm82.a4.v1 annot-version=Wm82.a4.v1	Glycine max	33	40	2.97×10-13	1
ss715578777	4.04862e-05	4.04862e-05	1202	0	Glyma.20G128900	Glyma.20G128900.1 dsid=glyma.Wm82.gnm4.ann1.Glyma.20G128900.1 pacid=41090387 polypeptide=Glyma.20G128900.1.p locus=Glyma.20G128900 ID=Glyma.20G128900.1.Wm82.a4.v1 annot-version=Wm82.a4.v1	Glycine max	100	104	7.85×10-49	0.952

## Sheet: negative gene distribution
Feature Names	Mean value	SHAP ABS	SHAP ranking	countif	gene	Similar sequences	Species	Query coverage (%)	Total score	E value	Identity (%)					negative gene numbers					chromosome	negative gene number	positive gene number	Total genes
ss715579729	-5.31986e-05	5.31986e-05	1147	0	Glyma.01G148600	Glyma.01G148600.1 dsid=glyma.Wm82.gnm4.ann1.Glyma.01G148600.1 pacid=41117562 polypeptide=Glyma.01G148600.1.p locus=Glyma.01G148600 ID=Glyma.01G148600.1.Wm82.a4.v1 annot-version=Wm82.a4.v1	Glycine max	39	47	3.81×10-17	1			01G	222	111					01G	111	74	185
ss715580208	-5.60871e-05	5.60871e-05	1138	0	Glyma.01G186600	Glyma.01G186600.1 dsid=glyma.Wm82.gnm4.ann1.Glyma.01G186600.1 pacid=41116636 polypeptide=Glyma.01G186600.1.p locus=Glyma.01G186600 ID=Glyma.01G186600.1.Wm82.a4.v1 annot-version=Wm82.a4.v1	Glycine max	85	103	2.82×10-48	1			02G	50	25					02G	25	8	33
ss715579839	-7.24637e-05	7.24637e-05	1099	0	Glyma.01G155000	Glyma.01G155000.1 dsid=glyma.Wm82.gnm4.ann1.Glyma.01G155000.1 pacid=41115735 polypeptide=Glyma.01G155000.1.p locus=Glyma.01G155000 ID=Glyma.01G155000.1.Wm82.a4.v1 annot-version=Wm82.a4.v1	Glycine max	100	121	2.78×10-58	1			03G	6	3					03G	3	1	4
ss715579065	-0.00010618	0.00010618	998	0	Glyma.01G032500	Glyma.01G032500.2 dsid=glyma.Wm82.gnm4.ann1.Glyma.01G032500.2 pacid=41116370 polypeptide=Glyma.01G032500.2.p locus=Glyma.01G032500 ID=Glyma.01G032500.2.Wm82.a4.v1 annot-version=Wm82.a4.v1	Glycine max	96	116	1.68×10-55	1			04G	0	0					04G	0	1	1
ss715579718	-0.000111553	0.000111553	835	0	Glyma.01G043800	Glyma.01G043800.1 dsid=glyma.Wm82.gnm4.ann1.Glyma.01G043800.1 pacid=41117541 polypeptide=Glyma.01G043800.1.p locus=Glyma.01G043800 ID=Glyma.01G043800.1.Wm82.a4.v1 annot-version=Wm82.a4.v1	Glycine max	100	121	2.78×10-58	1			05G	0	0					05G	0	1	1
ss715579037	-0.000115501	0.000115501	834	0	Glyma.01G031800	Glyma.01G031800.5 dsid=glyma.Wm82.gnm4.ann1.Glyma.01G031800.5 pacid=41115780 polypeptide=Glyma.01G031800.5.p locus=Glyma.01G031800 ID=Glyma.01G031800.5.Wm82.a4.v1 annot-version=Wm82.a4.v1	Glycine max	100	121	2.78×10-58	1			06G	4	2					06G	2	0	2
ss715580871	-0.000126622	0.000126622	825	0	Glyma.01G009700	Glyma.01G009700.1 dsid=glyma.Wm82.gnm4.ann1.Glyma.01G009700.1 pacid=41115429 polypeptide=Glyma.01G009700.1.p locus=Glyma.01G009700 ID=Glyma.01G009700.1.Wm82.a4.v1 annot-version=Wm82.a4.v1	Glycine max	100	121	2.78×10-58	1			07G	2	1					07G	1	0	1
ss715579286	-0.000132421	0.000132421	822	1	Glyma.01G036800	Glyma.01G036800.1 dsid=glyma.Wm82.gnm4.ann1.Glyma.01G036800.1 pacid=41116421 polypeptide=Glyma.01G036800.1.p locus=Glyma.01G036800 ID=Glyma.01G036800.1.Wm82.a4.v1 annot-version=Wm82.a4.v1	Glycine max	100	121	2.78×10-58	1			08G	0	0					08G	0	0	0
ss715580449	-0.00014029	0.00014029	817	0	Glyma.01G213500	Glyma.01G213500.1 dsid=glyma.Wm82.gnm4.ann1.Glyma.01G213500.1 pacid=41116990 polypeptide=Glyma.01G213500.1.p locus=Glyma.01G213500 ID=Glyma.01G213500.1.Wm82.a4.v1 annot-version=Wm82.a4.v1	Glycine max	68	82	1.33×10-36	1			09G	2	1					09G	1	2	3
ss715580291	-0.000141399	0.000141399	814	0	Glyma.01G192900	Glyma.01G192900.2 dsid=glyma.Wm82.gnm4.ann1.Glyma.01G192900.2 pacid=41117094 polypeptide=Glyma.01G192900.2.p locus=Glyma.01G192900 ID=Glyma.01G192900.2.Wm82.a4.v1 annot-version=Wm82.a4.v1	Glycine max	36	43	6.38×10-15	1			10G	2	1					10G	1	0	1
ss715579931	-0.000143977	0.000143977	812	0	Glyma.16G159550	Glyma.16G159550.1 dsid=glyma.Wm82.gnm4.ann1.Glyma.16G159550.1 pacid=41078058 polypeptide=Glyma.16G159550.1.p locus=Glyma.16G159550 ID=Glyma.16G159550.1.Wm82.a4.v1 annot-version=Wm82.a4.v1	Glycine max	60	44	1.77×10-15	0.868			11G	12	6					11G	6	2	8
ss715580132	-0.000145543	0.000145543	809	0	Glyma.01G179400	Glyma.01G179400.1 dsid=glyma.Wm82.gnm4.ann1.Glyma.01G179400.1 pacid=41116852 polypeptide=Glyma.01G179400.1.p locus=Glyma.01G179400 ID=Glyma.01G179400.1.Wm82.a4.v1 annot-version=Wm82.a4.v1	Glycine max	100	121	2.78×10-58	1			12G	2	1					12G	1	0	1
ss715578887	-0.000145751	0.000145751	808	0	Glyma.01G001900	Glyma.01G001900.2 dsid=glyma.Wm82.gnm4.ann1.Glyma.01G001900.2 pacid=41115132 polypeptide=Glyma.01G001900.2.p locus=Glyma.01G001900 ID=Glyma.01G001900.2.Wm82.a4.v1 annot-version=Wm82.a4.v1	Glycine max	34	41	8.25×10-14	1			13G	0	0					13G	0	0	0
ss715578643	-0.000148381	0.000148381	803	0	Glyma.01G019400	Glyma.01G019400.4 dsid=glyma.Wm82.gnm4.ann1.Glyma.01G019400.4 pacid=41117463 polypeptide=Glyma.01G019400.4.p locus=Glyma.01G019400 ID=Glyma.01G019400.4.Wm82.a4.v1 annot-version=Wm82.a4.v1	Glycine max	100	121	2.78×10-58	1			14G	0	0					14G	0	1	1
ss715578418	-0.000149213	0.000149213	802	0	Glyma.01G011100	Glyma.01G011100.1 dsid=glyma.Wm82.gnm4.ann1.Glyma.01G011100.1 pacid=41115401 polypeptide=Glyma.01G011100.1.p locus=Glyma.01G011100 ID=Glyma.01G011100.1.Wm82.a4.v1 annot-version=Wm82.a4.v1	Glycine max	35	42	2.29×10-14	1			15G	2	1					15G	1	0	1
ss715583754	-0.000150033	0.000150033	795	0	Glyma.02G006000	Glyma.02G006000.2 dsid=glyma.Wm82.gnm4.ann1.Glyma.02G006000.2 pacid=41096113 polypeptide=Glyma.02G006000.2.p locus=Glyma.02G006000 ID=Glyma.02G006000.2.Wm82.a4.v1 annot-version=Wm82.a4.v1	Glycine max	100	121	2.78×10-58	1			16G	4	2					16G	2	1	3
ss715578975	-0.00015004	0.00015004	793	0	Glyma.01G029600	Glyma.01G029600.1 dsid=glyma.Wm82.gnm4.ann1.Glyma.01G029600.1 pacid=41115810 polypeptide=Glyma.01G029600.1.p locus=Glyma.01G029600 ID=Glyma.01G029600.1.Wm82.a4.v1 annot-version=Wm82.a4.v1	Glycine max	26	32	8.31×10-9	1			17G	0	0					17G	0	0	0
ss715580438	-0.000150063	0.000150063	786	0	Glyma.01G209900	Glyma.01G209900.5 dsid=glyma.Wm82.gnm4.ann1.Glyma.01G209900.5 pacid=41117535 polypeptide=Glyma.01G209900.5.p locus=Glyma.01G209900 ID=Glyma.01G209900.5.Wm82.a4.v1 annot-version=Wm82.a4.v1	Glycine max	40	49	2.95×10-18	1			18G	0	0					18G	0	2	2
ss715578961	-0.000150099	0.000150099	774	0	Glyma.01G097200	Glyma.01G097200.7 dsid=glyma.Wm82.gnm4.ann1.Glyma.01G097200.7 pacid=41115553 polypeptide=Glyma.01G097200.7.p locus=Glyma.01G097200 ID=Glyma.01G097200.7.Wm82.a4.v1 annot-version=Wm82.a4.v1	Glycine max	90	109	1.30×10-51	1			19G	2	1					19G	1	2	3
ss715580792	-0.000150116	0.000150116	769	0	Glyma.01G056800	Glyma.01G056800.8 dsid=glyma.Wm82.gnm4.ann1.Glyma.01G056800.8 pacid=41117251 polypeptide=Glyma.01G056800.8.p locus=Glyma.01G056800 ID=Glyma.01G056800.8.Wm82.a4.v1 annot-version=Wm82.a4.v1	Glycine max	100	121	2.78×10-58	1			20G	2	1					20G	1	2	3
ss715579436	-0.000150128	0.000150128	763	1	Glyma.01G039700	Glyma.01G039700.1 dsid=glyma.Wm82.gnm4.ann1.Glyma.01G039700.1 pacid=41118035 polypeptide=Glyma.01G039700.1.p locus=Glyma.01G039700 ID=Glyma.01G039700.1.Wm82.a4.v1 annot-version=Wm82.a4.v1	Glycine max	100	121	2.78×10-58	1										Total	156	97	253
ss715579052	-0.000150144	0.000150144	755	0	Glyma.01G002600	Glyma.01G002600.1 dsid=glyma.Wm82.gnm4.ann1.Glyma.01G002600.1 pacid=41115716 polypeptide=Glyma.01G002600.1.p locus=Glyma.01G002600 ID=Glyma.01G002600.1.Wm82.a4.v1 annot-version=Wm82.a4.v1	Glycine max	100	121	2.78×10-58	1										total	156	97
ss715579450	-0.000150155	0.000150155	752	0	Glyma.01G127900	Glyma.01G127900.2 dsid=glyma.Wm82.gnm4.ann1.Glyma.01G127900.2 pacid=41117464 polypeptide=Glyma.01G127900.2.p locus=Glyma.01G127900 ID=Glyma.01G127900.2.Wm82.a4.v1 annot-version=Wm82.a4.v1	Glycine max	100	121	2.78×10-58	1
ss715580728	-0.000150208	0.000150208	728	0	Glyma.01G245600	Glyma.01G245600.1 dsid=glyma.Wm82.gnm4.ann1.Glyma.01G245600.1 pacid=41116906 polypeptide=Glyma.01G245600.1.p locus=Glyma.01G245600 ID=Glyma.01G245600.1.Wm82.a4.v1 annot-version=Wm82.a4.v1	Glycine max	59	71	1.74×10-30	1
ss715578754	-0.000150214	0.000150214	720	0	Glyma.01G001300	Glyma.01G001300.4 dsid=glyma.Wm82.gnm4.ann1.Glyma.01G001300.4 pacid=41116075 polypeptide=Glyma.01G001300.4.p locus=Glyma.01G001300 ID=Glyma.01G001300.4.Wm82.a4.v1 annot-version=Wm82.a4.v1	Glycine max	54	65	3.76×10-27	1
ss715580013	-0.000150223	0.000150223	715	0	Glyma.01G167400	Glyma.01G167400.1 dsid=glyma.Wm82.gnm4.ann1.Glyma.01G167400.1 pacid=41117151 polypeptide=Glyma.01G167400.1.p locus=Glyma.01G167400 ID=Glyma.01G167400.1.Wm82.a4.v1 annot-version=Wm82.a4.v1	Glycine max	100	121	2.78×10-58	1
ss715578578	-0.000150228	0.000150228	712	0	Glyma.01G017000	Glyma.01G017000.1 dsid=glyma.Wm82.gnm4.ann1.Glyma.01G017000.1 pacid=41117148 polypeptide=Glyma.01G017000.1.p locus=Glyma.01G017000 ID=Glyma.01G017000.1.Wm82.a4.v1 annot-version=Wm82.a4.v1	Glycine max	100	121	2.78×10-58	1
ss715579048	-0.000150233	0.000150233	707	0	Glyma.01G002501	Glyma.01G002501.3 dsid=glyma.Wm82.gnm4.ann1.Glyma.01G002501.3 pacid=41116576 polypeptide=Glyma.01G002501.3.p locus=Glyma.01G002501 ID=Glyma.01G002501.3.Wm82.a4.v1 annot-version=Wm82.a4.v1	Glycine max	42	51	2.28×10-19	1
ss715578743	-0.000150241	0.000150241	704	0	Glyma.01G001300	Glyma.01G001300.5 dsid=glyma.Wm82.gnm4.ann1.Glyma.01G001300.5 pacid=41116076 polypeptide=Glyma.01G001300.5.p locus=Glyma.01G001300 ID=Glyma.01G001300.5.Wm82.a4.v1 annot-version=Wm82.a4.v1	Glycine max	80	92	3.68×10-42	0.98
ss715579135	-0.000150254	0.000150254	697	0	Glyma.01G034600	Glyma.01G034600.1 dsid=glyma.Wm82.gnm4.ann1.Glyma.01G034600.1 pacid=41115757 polypeptide=Glyma.01G034600.1.p locus=Glyma.01G034600 ID=Glyma.01G034600.1.Wm82.a4.v1 annot-version=Wm82.a4.v1	Glycine max	73	82	1.33×10-36	0.978
ss715578406	-0.00015026	0.00015026	695	0	Glyma.01G010400	Glyma.01G010400.1 dsid=glyma.Wm82.gnm4.ann1.Glyma.01G010400.1 pacid=41114163 polypeptide=Glyma.01G010400.1.p locus=Glyma.01G010400 ID=Glyma.01G010400.1.Wm82.a4.v1 annot-version=Wm82.a4.v1	Glycine max	42	48	1.06×10-17	0.98
ss715580472	-0.000150274	0.000150274	686	0	Glyma.01G217100	Glyma.01G217100.1 dsid=glyma.Wm82.gnm4.ann1.Glyma.01G217100.1 pacid=41114704 polypeptide=Glyma.01G217100.1.p locus=Glyma.01G217100 ID=Glyma.01G217100.1.Wm82.a4.v1 annot-version=Wm82.a4.v1	Glycine max	100	121	2.78×10-58	1
ss715579181	-0.000150292	0.000150292	682	0	Glyma.01G035400	Glyma.01G035400.1 dsid=glyma.Wm82.gnm4.ann1.Glyma.01G035400.1 pacid=41115636 polypeptide=Glyma.01G035400.1.p locus=Glyma.01G035400 ID=Glyma.01G035400.1.Wm82.a4.v1 annot-version=Wm82.a4.v1	Glycine max	100	121	2.78×10-58	1
ss715580529	-0.0001503	0.0001503	677	0	Glyma.11G021000	Glyma.11G021000.1 dsid=glyma.Wm82.gnm4.ann1.Glyma.11G021000.1 pacid=41127511 polypeptide=Glyma.11G021000.1.p locus=Glyma.11G021000 ID=Glyma.11G021000.1.Wm82.a4.v1 annot-version=Wm82.a4.v1	Glycine max	31	31	2.99×10-8	0.947
ss715578950	-0.000150314	0.000150314	672	0	Glyma.01G094300	Glyma.01G094300.1 dsid=glyma.Wm82.gnm4.ann1.Glyma.01G094300.1 pacid=41117120 polypeptide=Glyma.01G094300.1.p locus=Glyma.01G094300 ID=Glyma.01G094300.1.Wm82.a4.v1 annot-version=Wm82.a4.v1	Glycine max	77	93	1.02×10-42	1
ss715580560	-0.000150345	0.000150345	663	0	Glyma.01G224300	Glyma.01G224300.1 dsid=glyma.Wm82.gnm4.ann1.Glyma.01G224300.1 pacid=41116004 polypeptide=Glyma.01G224300.1.p locus=Glyma.01G224300 ID=Glyma.01G224300.1.Wm82.a4.v1 annot-version=Wm82.a4.v1	Glycine max	100	121	2.78×10-58	1
ss715579268	-0.000150368	0.000150368	655	0	Glyma.01G036700	Glyma.01G036700.1 dsid=glyma.Wm82.gnm4.ann1.Glyma.01G036700.1 pacid=41115295 polypeptide=Glyma.01G036700.1.p locus=Glyma.01G036700 ID=Glyma.01G036700.1.Wm82.a4.v1 annot-version=Wm82.a4.v1	Glycine max	83	100	1.31×10-46	1
ss715578907	-0.00015037	0.00015037	653	1	Glyma.01G027900	Glyma.01G027900.1 dsid=glyma.Wm82.gnm4.ann1.Glyma.01G027900.1 pacid=41114317 polypeptide=Glyma.01G027900.1.p locus=Glyma.01G027900 ID=Glyma.01G027900.1.Wm82.a4.v1 annot-version=Wm82.a4.v1	Glycine max	83	101	3.65×10-47	1
ss715580442	-0.000150386	0.000150386	648	0	Glyma.01G210700	Glyma.01G210700.1 dsid=glyma.Wm82.gnm4.ann1.Glyma.01G210700.1 pacid=41115957 polypeptide=Glyma.01G210700.1.p locus=Glyma.01G210700 ID=Glyma.01G210700.1.Wm82.a4.v1 annot-version=Wm82.a4.v1	Glycine max	100	121	2.78×10-58	1
ss715579884	-0.000150389	0.000150389	645	1	Glyma.01G157400	Glyma.01G157400.1 dsid=glyma.Wm82.gnm4.ann1.Glyma.01G157400.1 pacid=41114454 polypeptide=Glyma.01G157400.1.p locus=Glyma.01G157400 ID=Glyma.01G157400.1.Wm82.a4.v1 annot-version=Wm82.a4.v1	Glycine max	99	120	1.00×10-57	1
ss715580767	-0.000150394	0.000150394	642	0	Glyma.01G052900	Glyma.01G052900.3 dsid=glyma.Wm82.gnm4.ann1.Glyma.01G052900.3 pacid=41114311 polypeptide=Glyma.01G052900.3.p locus=Glyma.01G052900 ID=Glyma.01G052900.3.Wm82.a4.v1 annot-version=Wm82.a4.v1	Glycine max	100	121	2.78×10-58	1
ss715578622	-0.000150484	0.000150484	619	0	Glyma.01G018800	Glyma.01G018800.1 dsid=glyma.Wm82.gnm4.ann1.Glyma.01G018800.1 pacid=41117069 polypeptide=Glyma.01G018800.1.p locus=Glyma.01G018800 ID=Glyma.01G018800.1.Wm82.a4.v1 annot-version=Wm82.a4.v1	Glycine max	80	97	6.11×10-45	1
ss715580437	-0.000150497	0.000150497	618	1	Glyma.01G046300	Glyma.01G046300.1 dsid=glyma.Wm82.gnm4.ann1.Glyma.01G046300.1 pacid=41116008 polypeptide=Glyma.01G046300.1.p locus=Glyma.01G046300 ID=Glyma.01G046300.1.Wm82.a4.v1 annot-version=Wm82.a4.v1	Glycine max	100	121	2.78×10-58	1
ss715579752	-0.000218857	0.000218857	592	0	Glyma.01G150800	Glyma.01G150800.1 dsid=glyma.Wm82.gnm4.ann1.Glyma.01G150800.1 pacid=41117190 polypeptide=Glyma.01G150800.1.p locus=Glyma.01G150800 ID=Glyma.01G150800.1.Wm82.a4.v1 annot-version=Wm82.a4.v1	Glycine max	26	28	1.39×10-6	0.969
ss715581322	-0.000222535	0.000222535	591	0	Glyma.02G016800	Glyma.02G016800.1 dsid=glyma.Wm82.gnm4.ann1.Glyma.02G016800.1 pacid=41096892 polypeptide=Glyma.02G016800.1.p locus=Glyma.02G016800 ID=Glyma.02G016800.1.Wm82.a4.v1 annot-version=Wm82.a4.v1	Glycine max	100	121	2.78×10-58	1
ss715580548	-0.000223151	0.000223151	590	0	Glyma.01G223500	Glyma.01G223500.4 dsid=glyma.Wm82.gnm4.ann1.Glyma.01G223500.4 pacid=41117146 polypeptide=Glyma.01G223500.4.p locus=Glyma.01G223500 ID=Glyma.01G223500.4.Wm82.a4.v1 annot-version=Wm82.a4.v1	Glycine max	100	121	2.78×10-58	1
ss715580410	-0.000230692	0.000230692	584	0	Glyma.01G204700	Glyma.01G204700.1 dsid=glyma.Wm82.gnm4.ann1.Glyma.01G204700.1 pacid=41116129 polypeptide=Glyma.01G204700.1.p locus=Glyma.01G204700 ID=Glyma.01G204700.1.Wm82.a4.v1 annot-version=Wm82.a4.v1	Glycine max	100	121	2.78×10-58	1
ss715580073	-0.000247479	0.000247479	582	0	Glyma.11G070900	Glyma.11G070900.1 dsid=glyma.Wm82.gnm4.ann1.Glyma.11G070900.1 pacid=41127744 polypeptide=Glyma.11G070900.1.p locus=Glyma.11G070900 ID=Glyma.11G070900.1.Wm82.a4.v1 annot-version=Wm82.a4.v1	Glycine max	49	55	1.36×10-21	0.983
ss715578933	-0.000248385	0.000248385	581	0	Glyma.20G200500	Glyma.20G200500.1 dsid=glyma.Wm82.gnm4.ann1.Glyma.20G200500.1 pacid=41090070 polypeptide=Glyma.20G200500.1.p locus=Glyma.20G200500 ID=Glyma.20G200500.1.Wm82.a4.v1 annot-version=Wm82.a4.v1	Glycine max	69	69	2.24×10-29	0.94
ss715583664	-0.000252432	0.000252432	580	0	Glyma.16G159550	Glyma.16G159550.1 dsid=glyma.Wm82.gnm4.ann1.Glyma.16G159550.1 pacid=41078058 polypeptide=Glyma.16G159550.1.p locus=Glyma.16G159550 ID=Glyma.16G159550.1.Wm82.a4.v1 annot-version=Wm82.a4.v1	Glycine max	36	38	3.84×10-12	0.955
ss715583798	-0.000254467	0.000254467	571	1	Glyma.02G006500	Glyma.02G006500.1 dsid=glyma.Wm82.gnm4.ann1.Glyma.02G006500.1 pacid=41098349 polypeptide=Glyma.02G006500.1.p locus=Glyma.02G006500 ID=Glyma.02G006500.1.Wm82.a4.v1 annot-version=Wm82.a4.v1	Glycine max	100	121	2.78×10-58	1
ss715579832	-0.000254517	0.000254517	566	0	Glyma.11G089700	Glyma.11G089700.1 dsid=glyma.Wm82.gnm4.ann1.Glyma.11G089700.1 pacid=41127902 polypeptide=Glyma.11G089700.1.p locus=Glyma.11G089700 ID=Glyma.11G089700.1.Wm82.a4.v1 annot-version=Wm82.a4.v1	Glycine max	41	50	8.19×10-19	1
ss715581491	-0.000254531	0.000254531	564	0	Glyma.02G024400	Glyma.02G024400.1 dsid=glyma.Wm82.gnm4.ann1.Glyma.02G024400.1 pacid=41097002 polypeptide=Glyma.02G024400.1.p locus=Glyma.02G024400 ID=Glyma.02G024400.1.Wm82.a4.v1 annot-version=Wm82.a4.v1	Glycine max	100	121	2.78×10-58	1
ss715580463	-0.000302482	0.000302482	488	0	Glyma.01G216000	Glyma.01G216000.1 dsid=glyma.Wm82.gnm4.ann1.Glyma.01G216000.1 pacid=41116273 polypeptide=Glyma.01G216000.1.p locus=Glyma.01G216000 ID=Glyma.01G216000.1.Wm82.a4.v1 annot-version=Wm82.a4.v1	Glycine max	100	121	2.78×10-58	1
ss715580609	-0.000332201	0.000332201	482	0	Glyma.01G229400	Glyma.01G229400.1 dsid=glyma.Wm82.gnm4.ann1.Glyma.01G229400.1 pacid=41115815 polypeptide=Glyma.01G229400.1.p locus=Glyma.01G229400 ID=Glyma.01G229400.1.Wm82.a4.v1 annot-version=Wm82.a4.v1	Glycine max	100	121	2.78×10-58	1
ss715581451	-0.000358721	0.000358721	475	0	Glyma.02G022200	Glyma.02G022200.1 dsid=glyma.Wm82.gnm4.ann1.Glyma.02G022200.1 pacid=41097626 polypeptide=Glyma.02G022200.1.p locus=Glyma.02G022200 ID=Glyma.02G022200.1.Wm82.a4.v1 annot-version=Wm82.a4.v1	Glycine max	100	121	2.78×10-58	1
ss715579771	-0.000372691	0.000372691	468	0	Glyma.01G152000	Glyma.01G152000.1 dsid=glyma.Wm82.gnm4.ann1.Glyma.01G152000.1 pacid=41116972 polypeptide=Glyma.01G152000.1.p locus=Glyma.01G152000 ID=Glyma.01G152000.1.Wm82.a4.v1 annot-version=Wm82.a4.v1	Glycine max	100	121	2.78×10-58	1
ss715580537	-0.000377166	0.000377166	466	1	Glyma.01G222700	Glyma.01G222700.1 dsid=glyma.Wm82.gnm4.ann1.Glyma.01G222700.1 pacid=41116853 polypeptide=Glyma.01G222700.1.p locus=Glyma.01G222700 ID=Glyma.01G222700.1.Wm82.a4.v1 annot-version=Wm82.a4.v1	Glycine max	100	121	2.78×10-58	1
ss715579332	-0.000380276	0.000380276	465	0	Glyma.01G038100	Glyma.01G038100.1 dsid=glyma.Wm82.gnm4.ann1.Glyma.01G038100.1 pacid=41117178 polypeptide=Glyma.01G038100.1.p locus=Glyma.01G038100 ID=Glyma.01G038100.1.Wm82.a4.v1 annot-version=Wm82.a4.v1	Glycine max	100	121	2.78×10-58	1
ss715580030	-0.000387764	0.000387764	459	0	Glyma.11G074900	Glyma.11G074900.3 dsid=glyma.Wm82.gnm4.ann1.Glyma.11G074900.3 pacid=41131095 polypeptide=Glyma.11G074900.3.p locus=Glyma.11G074900 ID=Glyma.11G074900.3.Wm82.a4.v1 annot-version=Wm82.a4.v1	Glycine max	35	42	2.29×10-14	1
ss715581729	-0.000398953	0.000398953	451	0	Glyma.02G032100	Glyma.02G032100.1 dsid=glyma.Wm82.gnm4.ann1.Glyma.02G032100.1 pacid=41095836 polypeptide=Glyma.02G032100.1.p locus=Glyma.02G032100 ID=Glyma.02G032100.1.Wm82.a4.v1 annot-version=Wm82.a4.v1	Glycine max	100	121	2.78×10-58	1
ss715579652	-0.000403412	0.000403412	447	0	Glyma.03G022100	Glyma.03G022100.1 dsid=glyma.Wm82.gnm4.ann1.Glyma.03G022100.1 pacid=41159120 polypeptide=Glyma.03G022100.1.p locus=Glyma.03G022100 ID=Glyma.03G022100.1.Wm82.a4.v1 annot-version=Wm82.a4.v1	Glycine max	98	99	4.72×10-46	0.942
ss715579618	-0.000406661	0.000406661	444	0	Glyma.07G196000	Glyma.07G196000.1 dsid=glyma.Wm82.gnm4.ann1.Glyma.07G196000.1 pacid=41126350 polypeptide=Glyma.07G196000.1.p locus=Glyma.07G196000 ID=Glyma.07G196000.1.Wm82.a4.v1 annot-version=Wm82.a4.v1	Glycine max	100	90	4.76×10-41	0.919
ss715579557	-0.000406667	0.000406667	443	0	Glyma.01G139666	Glyma.01G139666.1 dsid=glyma.Wm82.gnm4.ann1.Glyma.01G139666.1 pacid=41114446 polypeptide=Glyma.01G139666.1.p locus=Glyma.01G139666 ID=Glyma.01G139666.1.Wm82.a4.v1 annot-version=Wm82.a4.v1	Glycine max	100	121	2.78×10-58	1
ss715580048	-0.000407407	0.000407407	442	0	Glyma.01G170700	Glyma.01G170700.2 dsid=glyma.Wm82.gnm4.ann1.Glyma.01G170700.2 pacid=41117942 polypeptide=Glyma.01G170700.2.p locus=Glyma.01G170700 ID=Glyma.01G170700.2.Wm82.a4.v1 annot-version=Wm82.a4.v1	Glycine max	100	121	2.78×10-58	1
ss715580965	-0.000407756	0.000407756	441	0	Glyma.02G011900	Glyma.02G011900.1 dsid=glyma.Wm82.gnm4.ann1.Glyma.02G011900.1 pacid=41095321 polypeptide=Glyma.02G011900.1.p locus=Glyma.02G011900 ID=Glyma.02G011900.1.Wm82.a4.v1 annot-version=Wm82.a4.v1	Glycine max	100	121	2.78×10-58	1
ss715580445	-0.000409517	0.000409517	437	0	Glyma.01G212500	Glyma.01G212500.1 dsid=glyma.Wm82.gnm4.ann1.Glyma.01G212500.1 pacid=41117246 polypeptide=Glyma.01G212500.1.p locus=Glyma.01G212500 ID=Glyma.01G212500.1.Wm82.a4.v1 annot-version=Wm82.a4.v1	Glycine max	32	39	1.07×10-12	1
ss715578575	-0.000410374	0.000410374	433	0	Glyma.01G016900	Glyma.01G016900.1 dsid=glyma.Wm82.gnm4.ann1.Glyma.01G016900.1 pacid=41116626 polypeptide=Glyma.01G016900.1.p locus=Glyma.01G016900 ID=Glyma.01G016900.1.Wm82.a4.v1 annot-version=Wm82.a4.v1	Glycine max	100	121	2.78×10-58	1
ss715581575	-0.000410612	0.000410612	431	0	Glyma.02G026800	Glyma.02G026800.1 dsid=glyma.Wm82.gnm4.ann1.Glyma.02G026800.1 pacid=41095420 polypeptide=Glyma.02G026800.1.p locus=Glyma.02G026800 ID=Glyma.02G026800.1.Wm82.a4.v1 annot-version=Wm82.a4.v1	Glycine max	100	121	2.78×10-58	1
ss715579420	-0.000410682	0.000410682	428	0	Glyma.01G125100	Glyma.01G125100.4 dsid=glyma.Wm82.gnm4.ann1.Glyma.01G125100.4 pacid=41117347 polypeptide=Glyma.01G125100.4.p locus=Glyma.01G125100 ID=Glyma.01G125100.4.Wm82.a4.v1 annot-version=Wm82.a4.v1	Glycine max	55	66	1.04×10-27	1
ss715579051	-0.00041074	0.00041074	416	0	Glyma.06G099400	Glyma.06G099400.1 dsid=glyma.Wm82.gnm4.ann1.Glyma.06G099400.1 pacid=41152331 polypeptide=Glyma.06G099400.1.p locus=Glyma.06G099400 ID=Glyma.06G099400.1.Wm82.a4.v1 annot-version=Wm82.a4.v1	Glycine max	64	45	4.93×10-16	0.859
ss715579572	-0.000410764	0.000410764	410	0	Glyma.12G116000	Glyma.12G116000.2 dsid=glyma.Wm82.gnm4.ann1.Glyma.12G116000.2 pacid=41102351 polypeptide=Glyma.12G116000.2.p locus=Glyma.12G116000 ID=Glyma.12G116000.2.Wm82.a4.v1 annot-version=Wm82.a4.v1	Glycine max	99	72	4.83×10-31	0.868
ss715579131	-0.000410801	0.000410801	397	1	Glyma.01G034402	Glyma.01G034402.1 dsid=glyma.Wm82.gnm4.ann1.Glyma.01G034402.1 pacid=41115340 polypeptide=Glyma.01G034402.1.p locus=Glyma.01G034402 ID=Glyma.01G034402.1.Wm82.a4.v1 annot-version=Wm82.a4.v1	Glycine max	100	121	2.78×10-58	1
ss715579720	-0.000410814	0.000410814	394	0	Glyma.09G070300	Glyma.09G070300.3 dsid=glyma.Wm82.gnm4.ann1.Glyma.09G070300.3 pacid=41134205 polypeptide=Glyma.09G070300.3.p locus=Glyma.09G070300 ID=Glyma.09G070300.3.Wm82.a4.v1 annot-version=Wm82.a4.v1	Glycine max	75	79	6.20×10-35	0.956
ss715584228	-0.000410822	0.000410822	393	0	Glyma.10G010501	Glyma.10G010501.1 dsid=glyma.Wm82.gnm4.ann1.Glyma.10G010501.1 pacid=41105065 polypeptide=Glyma.10G010501.1.p locus=Glyma.10G010501 ID=Glyma.10G010501.1.Wm82.a4.v1 annot-version=Wm82.a4.v1	Glycine max	100	97	6.11×10-45	0.934
ss715579841	-0.000410828	0.000410828	391	0	Glyma.01G155200	Glyma.01G155200.1 dsid=glyma.Wm82.gnm4.ann1.Glyma.01G155200.1 pacid=41117138 polypeptide=Glyma.01G155200.1.p locus=Glyma.01G155200 ID=Glyma.01G155200.1.Wm82.a4.v1 annot-version=Wm82.a4.v1	Glycine max	100	121	2.78×10-58	1
ss715579099	-0.000410836	0.000410836	385	1	Glyma.01G106800	Glyma.01G106800.3 dsid=glyma.Wm82.gnm4.ann1.Glyma.01G106800.3 pacid=41116795 polypeptide=Glyma.01G106800.3.p locus=Glyma.01G106800 ID=Glyma.01G106800.3.Wm82.a4.v1 annot-version=Wm82.a4.v1	Glycine max	100	121	2.78×10-58	1
ss715579404	-0.000410836	0.000410836	386	0	Glyma.01G124000	Glyma.01G124000.1 dsid=glyma.Wm82.gnm4.ann1.Glyma.01G124000.1 pacid=41116631 polypeptide=Glyma.01G124000.1.p locus=Glyma.01G124000 ID=Glyma.01G124000.1.Wm82.a4.v1 annot-version=Wm82.a4.v1	Glycine max	100	121	2.78×10-58	1
ss715580219	-0.000410857	0.000410857	377	0	Glyma.01G187400	Glyma.01G187400.1 dsid=glyma.Wm82.gnm4.ann1.Glyma.01G187400.1 pacid=41116297 polypeptide=Glyma.01G187400.1.p locus=Glyma.01G187400 ID=Glyma.01G187400.1.Wm82.a4.v1 annot-version=Wm82.a4.v1	Glycine max	57	69	2.24×10-29	1
ss715581548	-0.000410862	0.000410862	370	0	Glyma.02G001800	Glyma.02G001800.1 dsid=glyma.Wm82.gnm4.ann1.Glyma.02G001800.1 pacid=41095998 polypeptide=Glyma.02G001800.1.p locus=Glyma.02G001800 ID=Glyma.02G001800.1.Wm82.a4.v1 annot-version=Wm82.a4.v1	Glycine max	100	121	2.78×10-58	1
ss715580481	-0.000410863	0.000410863	369	0	Glyma.01G217500	Glyma.01G217500.1 dsid=glyma.Wm82.gnm4.ann1.Glyma.01G217500.1 pacid=41114523 polypeptide=Glyma.01G217500.1.p locus=Glyma.01G217500 ID=Glyma.01G217500.1.Wm82.a4.v1 annot-version=Wm82.a4.v1	Glycine max	100	121	2.78×10-58	1
ss715580430	-0.000410866	0.000410866	368	0	Glyma.01G209100	Glyma.01G209100.1 dsid=glyma.Wm82.gnm4.ann1.Glyma.01G209100.1 pacid=41117341 polypeptide=Glyma.01G209100.1.p locus=Glyma.01G209100 ID=Glyma.01G209100.1.Wm82.a4.v1 annot-version=Wm82.a4.v1	Glycine max	100	121	2.78×10-58	1
ss715579815	-0.000410867	0.000410867	367	0	Glyma.01G153400	Glyma.01G153400.1 dsid=glyma.Wm82.gnm4.ann1.Glyma.01G153400.1 pacid=41116153 polypeptide=Glyma.01G153400.1.p locus=Glyma.01G153400 ID=Glyma.01G153400.1.Wm82.a4.v1 annot-version=Wm82.a4.v1	Glycine max	100	121	2.78×10-58	1
ss715579123	-0.00041087	0.00041087	366	0	Glyma.01G034200	Glyma.01G034200.2 dsid=glyma.Wm82.gnm4.ann1.Glyma.01G034200.2 pacid=41116940 polypeptide=Glyma.01G034200.2.p locus=Glyma.01G034200 ID=Glyma.01G034200.2.Wm82.a4.v1 annot-version=Wm82.a4.v1	Glycine max	100	121	2.78×10-58	1
ss715580473	-0.000410872	0.000410872	363	0	Glyma.01G217100	Glyma.01G217100.3 dsid=glyma.Wm82.gnm4.ann1.Glyma.01G217100.3 pacid=41114706 polypeptide=Glyma.01G217100.3.p locus=Glyma.01G217100 ID=Glyma.01G217100.3.Wm82.a4.v1 annot-version=Wm82.a4.v1	Glycine max	51	62	1.75×10-25	1
ss715580411	-0.000410876	0.000410876	361	0	Glyma.01G204800	Glyma.01G204800.1 dsid=glyma.Wm82.gnm4.ann1.Glyma.01G204800.1 pacid=41114948 polypeptide=Glyma.01G204800.1.p locus=Glyma.01G204800 ID=Glyma.01G204800.1.Wm82.a4.v1 annot-version=Wm82.a4.v1	Glycine max	28	34	6.42×10-10	1
ss715580507	-0.000410888	0.000410888	354	0	Glyma.01G219800	Glyma.01G219800.2 dsid=glyma.Wm82.gnm4.ann1.Glyma.01G219800.2 pacid=41114502 polypeptide=Glyma.01G219800.2.p locus=Glyma.01G219800 ID=Glyma.01G219800.2.Wm82.a4.v1 annot-version=Wm82.a4.v1	Glycine max	100	121	2.78×10-58	1
ss715579299	-0.000410889	0.000410889	353	0	Glyma.01G037200	Glyma.01G037200.1 dsid=glyma.Wm82.gnm4.ann1.Glyma.01G037200.1 pacid=41117945 polypeptide=Glyma.01G037200.1.p locus=Glyma.01G037200 ID=Glyma.01G037200.1.Wm82.a4.v1 annot-version=Wm82.a4.v1	Glycine max	100	121	2.78×10-58	1
ss715579294	-0.000410894	0.000410894	350	0	Glyma.01G037100	Glyma.01G037100.1 dsid=glyma.Wm82.gnm4.ann1.Glyma.01G037100.1 pacid=41115690 polypeptide=Glyma.01G037100.1.p locus=Glyma.01G037100 ID=Glyma.01G037100.1.Wm82.a4.v1 annot-version=Wm82.a4.v1	Glycine max	98	118	1.29×10-56	1
ss715581466	-0.000410894	0.000410894	351	0	Glyma.02G001700	Glyma.02G001700.1 dsid=glyma.Wm82.gnm4.ann1.Glyma.02G001700.1 pacid=41098005 polypeptide=Glyma.02G001700.1.p locus=Glyma.02G001700 ID=Glyma.02G001700.1.Wm82.a4.v1 annot-version=Wm82.a4.v1	Glycine max	100	121	2.78×10-58	1
ss715582577	-0.0004109	0.0004109	345	0	Glyma.02G003700	Glyma.02G003700.1 dsid=glyma.Wm82.gnm4.ann1.Glyma.02G003700.1 pacid=41097084 polypeptide=Glyma.02G003700.1.p locus=Glyma.02G003700 ID=Glyma.02G003700.1.Wm82.a4.v1 annot-version=Wm82.a4.v1	Glycine max	83	101	3.65×10-47	1
ss715579369	-0.000410902	0.000410902	343	0	Glyma.01G121400	Glyma.01G121400.1 dsid=glyma.Wm82.gnm4.ann1.Glyma.01G121400.1 pacid=41117279 polypeptide=Glyma.01G121400.1.p locus=Glyma.01G121400 ID=Glyma.01G121400.1.Wm82.a4.v1 annot-version=Wm82.a4.v1	Glycine max	68	82	1.33×10-36	1
ss715580596	-0.000410906	0.000410906	336	0	Glyma.01G227200	Glyma.01G227200.2 dsid=glyma.Wm82.gnm4.ann1.Glyma.01G227200.2 pacid=41116181 polypeptide=Glyma.01G227200.2.p locus=Glyma.01G227200 ID=Glyma.01G227200.2.Wm82.a4.v1 annot-version=Wm82.a4.v1	Glycine max	100	121	2.78×10-58	1
ss715579786	-0.000410916	0.000410916	324	0	Glyma.01G152600	Glyma.01G152600.1 dsid=glyma.Wm82.gnm4.ann1.Glyma.01G152600.1 pacid=41115104 polypeptide=Glyma.01G152600.1.p locus=Glyma.01G152600 ID=Glyma.01G152600.1.Wm82.a4.v1 annot-version=Wm82.a4.v1	Glycine max	51	62	1.75×10-25	1
ss715581571	-0.000410921	0.000410921	318	0	Glyma.02G002000	Glyma.02G002000.2 dsid=glyma.Wm82.gnm4.ann1.Glyma.02G002000.2 pacid=41095459 polypeptide=Glyma.02G002000.2.p locus=Glyma.02G002000 ID=Glyma.02G002000.2.Wm82.a4.v1 annot-version=Wm82.a4.v1	Glycine max	100	121	2.78×10-58	1
ss715579333	-0.000410923	0.000410923	316	0	Glyma.01G038100	Glyma.01G038100.1 dsid=glyma.Wm82.gnm4.ann1.Glyma.01G038100.1 pacid=41117178 polypeptide=Glyma.01G038100.1.p locus=Glyma.01G038100 ID=Glyma.01G038100.1.Wm82.a4.v1 annot-version=Wm82.a4.v1	Glycine max	100	121	2.78×10-58	1
ss715581317	-0.000410926	0.000410926	315	0	Glyma.02G016500	Glyma.02G016500.1 dsid=glyma.Wm82.gnm4.ann1.Glyma.02G016500.1 pacid=41094996 polypeptide=Glyma.02G016500.1.p locus=Glyma.02G016500 ID=Glyma.02G016500.1.Wm82.a4.v1 annot-version=Wm82.a4.v1	Glycine max	100	121	2.78×10-58	1
ss715580666	-0.000410928	0.000410928	312	1	Glyma.01G235100	Glyma.01G235100.1 dsid=glyma.Wm82.gnm4.ann1.Glyma.01G235100.1 pacid=41116396 polypeptide=Glyma.01G235100.1.p locus=Glyma.01G235100 ID=Glyma.01G235100.1.Wm82.a4.v1 annot-version=Wm82.a4.v1	Glycine max	100	121	2.78×10-58	1
ss715583823	-0.000410936	0.000410936	308	0	Glyma.02G006700	Glyma.02G006700.2 dsid=glyma.Wm82.gnm4.ann1.Glyma.02G006700.2 pacid=41098420 polypeptide=Glyma.02G006700.2.p locus=Glyma.02G006700 ID=Glyma.02G006700.2.Wm82.a4.v1 annot-version=Wm82.a4.v1	Glycine max	28	34	6.42×10-10	1
ss715580675	-0.000410946	0.000410946	304	0	Glyma.01G235600	Glyma.01G235600.1 dsid=glyma.Wm82.gnm4.ann1.Glyma.01G235600.1 pacid=41117600 polypeptide=Glyma.01G235600.1.p locus=Glyma.01G235600 ID=Glyma.01G235600.1.Wm82.a4.v1 annot-version=Wm82.a4.v1	Glycine max	44	53	1.76×10-20	1
ss715581791	-0.000410951	0.000410951	298	0	Glyma.02G033400	Glyma.02G033400.1 dsid=glyma.Wm82.gnm4.ann1.Glyma.02G033400.1 pacid=41094498 polypeptide=Glyma.02G033400.1.p locus=Glyma.02G033400 ID=Glyma.02G033400.1.Wm82.a4.v1 annot-version=Wm82.a4.v1	Glycine max	100	121	2.78×10-58	1
ss715579116	-0.000410953	0.000410953	295	0	Glyma.01G107951	Glyma.01G107951.1 dsid=glyma.Wm82.gnm4.ann1.Glyma.01G107951.1 pacid=41114217 polypeptide=Glyma.01G107951.1.p locus=Glyma.01G107951 ID=Glyma.01G107951.1.Wm82.a4.v1 annot-version=Wm82.a4.v1	Glycine max	75	91	1.32×10-41	1
ss715579184	-0.000410956	0.000410956	292	0	Glyma.01G112500	Glyma.01G112500.8 dsid=glyma.Wm82.gnm4.ann1.Glyma.01G112500.8 pacid=41114929 polypeptide=Glyma.01G112500.8.p locus=Glyma.01G112500 ID=Glyma.01G112500.8.Wm82.a4.v1 annot-version=Wm82.a4.v1	Glycine max	100	121	2.78×10-58	1
ss715578726	-0.00041096	0.00041096	290	0	Glyma.01G001200	Glyma.01G001200.2 dsid=glyma.Wm82.gnm4.ann1.Glyma.01G001200.2 pacid=41117992 polypeptide=Glyma.01G001200.2.p locus=Glyma.01G001200 ID=Glyma.01G001200.2.Wm82.a4.v1 annot-version=Wm82.a4.v1	Glycine max	100	121	2.78×10-58	1
ss715580406	-0.000410963	0.000410963	288	0	Glyma.11G038500	Glyma.11G038500.2 dsid=glyma.Wm82.gnm4.ann1.Glyma.11G038500.2 pacid=41129675 polypeptide=Glyma.11G038500.2.p locus=Glyma.11G038500 ID=Glyma.11G038500.2.Wm82.a4.v1 annot-version=Wm82.a4.v1	Glycine max	100	91	1.32×10-41	0.917
ss715579596	-0.00041097	0.00041097	282	0	Glyma.06G085700	Glyma.06G085700.1 dsid=glyma.Wm82.gnm4.ann1.Glyma.06G085700.1 pacid=41152867 polypeptide=Glyma.06G085700.1.p locus=Glyma.06G085700 ID=Glyma.06G085700.1.Wm82.a4.v1 annot-version=Wm82.a4.v1	Glycine max	100	88	6.15×10-40	0.909
ss715579274	-0.000410983	0.000410983	274	0	Glyma.01G115700	Glyma.01G115700.1 dsid=glyma.Wm82.gnm4.ann1.Glyma.01G115700.1 pacid=41115711 polypeptide=Glyma.01G115700.1.p locus=Glyma.01G115700 ID=Glyma.01G115700.1.Wm82.a4.v1 annot-version=Wm82.a4.v1	Glycine max	100	121	2.78×10-58	1
ss715579833	-0.000410989	0.000410989	269	0	Glyma.03G245200	Glyma.03G245200.1 dsid=glyma.Wm82.gnm4.ann1.Glyma.03G245200.1 pacid=41156243 polypeptide=Glyma.03G245200.1.p locus=Glyma.03G245200 ID=Glyma.03G245200.1.Wm82.a4.v1 annot-version=Wm82.a4.v1	Glycine max	100	112	2.80×10-53	0.975
ss715579962	-0.000410999	0.000410999	261	0	Glyma.01G164700	Glyma.01G164700.1 dsid=glyma.Wm82.gnm4.ann1.Glyma.01G164700.1 pacid=41116154 polypeptide=Glyma.01G164700.1.p locus=Glyma.01G164700 ID=Glyma.01G164700.1.Wm82.a4.v1 annot-version=Wm82.a4.v1	Glycine max	100	121	2.78×10-58	1
ss715579371	-0.000411018	0.000411018	249	0	Glyma.03G058000	Glyma.03G058000.4 dsid=glyma.Wm82.gnm4.ann1.Glyma.03G058000.4 pacid=41158190 polypeptide=Glyma.03G058000.4.p locus=Glyma.03G058000 ID=Glyma.03G058000.4.Wm82.a4.v1 annot-version=Wm82.a4.v1	Glycine max	42	51	2.28×10-19	1
ss715580599	-0.000411021	0.000411021	246	0	Glyma.01G227300	Glyma.01G227300.1 dsid=glyma.Wm82.gnm4.ann1.Glyma.01G227300.1 pacid=41116314 polypeptide=Glyma.01G227300.1.p locus=Glyma.01G227300 ID=Glyma.01G227300.1.Wm82.a4.v1 annot-version=Wm82.a4.v1	Glycine max	100	121	2.78×10-58	1
ss715581188	-0.000411033	0.000411033	242	0	Glyma.02G015300	Glyma.02G015300.4 dsid=glyma.Wm82.gnm4.ann1.Glyma.02G015300.4 pacid=41096421 polypeptide=Glyma.02G015300.4.p locus=Glyma.02G015300 ID=Glyma.02G015300.4.Wm82.a4.v1 annot-version=Wm82.a4.v1	Glycine max	100	121	2.78×10-58	1
ss715581581	-0.000411035	0.000411035	241	0	Glyma.02G027000	Glyma.02G027000.1 dsid=glyma.Wm82.gnm4.ann1.Glyma.02G027000.1 pacid=41097309 polypeptide=Glyma.02G027000.1.p locus=Glyma.02G027000 ID=Glyma.02G027000.1.Wm82.a4.v1 annot-version=Wm82.a4.v1	Glycine max	100	121	2.78×10-58	1
ss715579410	-0.000411042	0.000411042	238	0	Glyma.01G039100	Glyma.01G039100.1 dsid=glyma.Wm82.gnm4.ann1.Glyma.01G039100.1 pacid=41117920 polypeptide=Glyma.01G039100.1.p locus=Glyma.01G039100 ID=Glyma.01G039100.1.Wm82.a4.v1 annot-version=Wm82.a4.v1	Glycine max	98	118	1.29×10-56	1
ss715580933	-0.000411048	0.000411048	235	0	Glyma.02G011200	Glyma.02G011200.2 dsid=glyma.Wm82.gnm4.ann1.Glyma.02G011200.2 pacid=41097011 polypeptide=Glyma.02G011200.2.p locus=Glyma.02G011200 ID=Glyma.02G011200.2.Wm82.a4.v1 annot-version=Wm82.a4.v1	Glycine max	100	121	2.78×10-58	1
ss715580580	-0.000411051	0.000411051	231	0	Glyma.01G226000	Glyma.01G226000.5 dsid=glyma.Wm82.gnm4.ann1.Glyma.01G226000.5 pacid=41117559 polypeptide=Glyma.01G226000.5.p locus=Glyma.01G226000 ID=Glyma.01G226000.5.Wm82.a4.v1 annot-version=Wm82.a4.v1	Glycine max	100	121	2.78×10-58	1
ss715581237	-0.000411058	0.000411058	227	0	Glyma.02G015700	Glyma.02G015700.1 dsid=glyma.Wm82.gnm4.ann1.Glyma.02G015700.1 pacid=41097690 polypeptide=Glyma.02G015700.1.p locus=Glyma.02G015700 ID=Glyma.02G015700.1.Wm82.a4.v1 annot-version=Wm82.a4.v1	Glycine max	45	51	2.28×10-19	0.981
ss715581321	-0.000411086	0.000411086	218	0	Glyma.02G016600	Glyma.02G016600.1 dsid=glyma.Wm82.gnm4.ann1.Glyma.02G016600.1 pacid=41097772 polypeptide=Glyma.02G016600.1.p locus=Glyma.02G016600 ID=Glyma.02G016600.1.Wm82.a4.v1 annot-version=Wm82.a4.v1	Glycine max	100	121	2.78×10-58	1
ss715583646	-0.000411104	0.000411104	211	0	Glyma.02G005100	Glyma.02G005100.1 dsid=glyma.Wm82.gnm4.ann1.Glyma.02G005100.1 pacid=41097052 polypeptide=Glyma.02G005100.1.p locus=Glyma.02G005100 ID=Glyma.02G005100.1.Wm82.a4.v1 annot-version=Wm82.a4.v1	Glycine max	100	121	2.78×10-58	1
ss715580453	-0.000411106	0.000411106	210	0	Glyma.01G213900	Glyma.01G213900.1 dsid=glyma.Wm82.gnm4.ann1.Glyma.01G213900.1 pacid=41116115 polypeptide=Glyma.01G213900.1.p locus=Glyma.01G213900 ID=Glyma.01G213900.1.Wm82.a4.v1 annot-version=Wm82.a4.v1	Glycine max	100	121	2.78×10-58	1
ss715579368	-0.000411114	0.000411114	206	0	Glyma.01G038500	Glyma.01G038500.1 dsid=glyma.Wm82.gnm4.ann1.Glyma.01G038500.1 pacid=41114847 polypeptide=Glyma.01G038500.1.p locus=Glyma.01G038500 ID=Glyma.01G038500.1.Wm82.a4.v1 annot-version=Wm82.a4.v1	Glycine max	100	121	2.78×10-58	1
ss715580448	-0.000411118	0.000411118	203	0	Glyma.01G213100	Glyma.01G213100.2 dsid=glyma.Wm82.gnm4.ann1.Glyma.01G213100.2 pacid=41116828 polypeptide=Glyma.01G213100.2.p locus=Glyma.01G213100 ID=Glyma.01G213100.2.Wm82.a4.v1 annot-version=Wm82.a4.v1	Glycine max	29	35	1.79×10-10	1
ss715579959	-0.000411119	0.000411119	202	0	Glyma.01G164500	Glyma.01G164500.2 dsid=glyma.Wm82.gnm4.ann1.Glyma.01G164500.2 pacid=41115293 polypeptide=Glyma.01G164500.2.p locus=Glyma.01G164500 ID=Glyma.01G164500.2.Wm82.a4.v1 annot-version=Wm82.a4.v1	Glycine max	86	104	7.85×10-49	1
ss715580450	-0.000411126	0.000411126	200	0	Glyma.01G213500	Glyma.01G213500.1 dsid=glyma.Wm82.gnm4.ann1.Glyma.01G213500.1 pacid=41116990 polypeptide=Glyma.01G213500.1.p locus=Glyma.01G213500 ID=Glyma.01G213500.1.Wm82.a4.v1 annot-version=Wm82.a4.v1	Glycine max	90	109	1.30×10-51	1
ss715580171	-0.000411127	0.000411127	198	0	Glyma.01G182600	Glyma.01G182600.1 dsid=glyma.Wm82.gnm4.ann1.Glyma.01G182600.1 pacid=41115632 polypeptide=Glyma.01G182600.1.p locus=Glyma.01G182600 ID=Glyma.01G182600.1.Wm82.a4.v1 annot-version=Wm82.a4.v1	Glycine max	48	58	2.92×10-23	1
ss715578563	-0.00041115	0.00041115	190	0	Glyma.01G016500	Glyma.01G016500.5 dsid=glyma.Wm82.gnm4.ann1.Glyma.01G016500.5 pacid=41114670 polypeptide=Glyma.01G016500.5.p locus=Glyma.01G016500 ID=Glyma.01G016500.5.Wm82.a4.v1 annot-version=Wm82.a4.v1	Glycine max	84	102	1.02×10-47	1
ss715581682	-0.00041115	0.00041115	192	0	Glyma.01G035600	Glyma.01G035600.1 dsid=glyma.Wm82.gnm4.ann1.Glyma.01G035600.1 pacid=41116202 polypeptide=Glyma.01G035600.1.p locus=Glyma.01G035600 ID=Glyma.01G035600.1.Wm82.a4.v1 annot-version=Wm82.a4.v1	Glycine max	60	44	1.77×10-15	0.866
ss715583013	-0.00041115	0.00041115	191	0	Glyma.02G004100	Glyma.02G004100.1 dsid=glyma.Wm82.gnm4.ann1.Glyma.02G004100.1 pacid=41098176 polypeptide=Glyma.02G004100.1.p locus=Glyma.02G004100 ID=Glyma.02G004100.1.Wm82.a4.v1 annot-version=Wm82.a4.v1	Glycine max	38	46	1.37×10-16	1
ss715578476	-0.000411165	0.000411165	188	0	Glyma.01G013800	Glyma.01G013800.2 dsid=glyma.Wm82.gnm4.ann1.Glyma.01G013800.2 pacid=41116118 polypeptide=Glyma.01G013800.2.p locus=Glyma.01G013800 ID=Glyma.01G013800.2.Wm82.a4.v1 annot-version=Wm82.a4.v1	Glycine max	100	121	2.78×10-58	1
ss715580611	-0.000411373	0.000411373	181	0	Glyma.01G229500	Glyma.01G229500.4 dsid=glyma.Wm82.gnm4.ann1.Glyma.01G229500.4 pacid=41116971 polypeptide=Glyma.01G229500.4.p locus=Glyma.01G229500 ID=Glyma.01G229500.4.Wm82.a4.v1 annot-version=Wm82.a4.v1	Glycine max	100	121	2.78×10-58	1
ss715580554	-0.000411478	0.000411478	177	0	Glyma.01G224000	Glyma.01G224000.2 dsid=glyma.Wm82.gnm4.ann1.Glyma.01G224000.2 pacid=41117307 polypeptide=Glyma.01G224000.2.p locus=Glyma.01G224000 ID=Glyma.01G224000.2.Wm82.a4.v1 annot-version=Wm82.a4.v1	Glycine max	100	121	2.78×10-58	1
ss715579695	-0.000411514	0.000411514	176	1	Glyma.01G146600	Glyma.01G146600.3 dsid=glyma.Wm82.gnm4.ann1.Glyma.01G146600.3 pacid=41115067 polypeptide=Glyma.01G146600.3.p locus=Glyma.01G146600 ID=Glyma.01G146600.3.Wm82.a4.v1 annot-version=Wm82.a4.v1	Glycine max	73	88	6.15×10-40	1
ss715578568	-0.000411557	0.000411557	175	0	Glyma.01G016700	Glyma.01G016700.1 dsid=glyma.Wm82.gnm4.ann1.Glyma.01G016700.1 pacid=41115381 polypeptide=Glyma.01G016700.1.p locus=Glyma.01G016700 ID=Glyma.01G016700.1.Wm82.a4.v1 annot-version=Wm82.a4.v1	Glycine max	100	121	2.78×10-58	1
ss715578554	-0.000411578	0.000411578	174	0	Glyma.01G016100	Glyma.01G016100.1 dsid=glyma.Wm82.gnm4.ann1.Glyma.01G016100.1 pacid=41115210 polypeptide=Glyma.01G016100.1.p locus=Glyma.01G016100 ID=Glyma.01G016100.1.Wm82.a4.v1 annot-version=Wm82.a4.v1	Glycine max	100	121	2.78×10-58	1
ss715578550	-0.000411594	0.000411594	173	0	Glyma.01G015800	Glyma.01G015800.1 dsid=glyma.Wm82.gnm4.ann1.Glyma.01G015800.1 pacid=41115403 polypeptide=Glyma.01G015800.1.p locus=Glyma.01G015800 ID=Glyma.01G015800.1.Wm82.a4.v1 annot-version=Wm82.a4.v1	Glycine max	100	121	2.78×10-58	1
ss715581483	-0.000411714	0.000411714	168	0	Glyma.02G023700	Glyma.02G023700.1 dsid=glyma.Wm82.gnm4.ann1.Glyma.02G023700.1 pacid=41095474 polypeptide=Glyma.02G023700.1.p locus=Glyma.02G023700 ID=Glyma.02G023700.1.Wm82.a4.v1 annot-version=Wm82.a4.v1	Glycine max	100	121	2.78×10-58	1
ss715578547	-0.00041172	0.00041172	167	0	Glyma.01G015700	Glyma.01G015700.14 dsid=glyma.Wm82.gnm4.ann1.Glyma.01G015700.14 pacid=41116348 polypeptide=Glyma.01G015700.14.p locus=Glyma.01G015700 ID=Glyma.01G015700.14.Wm82.a4.v1 annot-version=Wm82.a4.v1	Glycine max	53	64	1.35×10-26	1
ss715580422	-0.000411745	0.000411745	166	0	Glyma.01G206600	Glyma.01G206600.1 dsid=glyma.Wm82.gnm4.ann1.Glyma.01G206600.1 pacid=41116992 polypeptide=Glyma.01G206600.1.p locus=Glyma.01G206600 ID=Glyma.01G206600.1.Wm82.a4.v1 annot-version=Wm82.a4.v1	Glycine max	100	121	2.78×10-58	1
ss715579528	-0.00041264	0.00041264	158	0	Glyma.01G136300	Glyma.01G136300.3 dsid=glyma.Wm82.gnm4.ann1.Glyma.01G136300.3 pacid=41117481 polypeptide=Glyma.01G136300.3.p locus=Glyma.01G136300 ID=Glyma.01G136300.3.Wm82.a4.v1 annot-version=Wm82.a4.v1	Glycine max	100	121	2.78×10-58	1
ss715580601	-0.000412698	0.000412698	157	0	Glyma.01G227700	Glyma.01G227700.2 dsid=glyma.Wm82.gnm4.ann1.Glyma.01G227700.2 pacid=41114589 polypeptide=Glyma.01G227700.2.p locus=Glyma.01G227700 ID=Glyma.01G227700.2.Wm82.a4.v1 annot-version=Wm82.a4.v1	Glycine max	81	98	1.70×10-45	1
ss715579518	-0.000415682	0.000415682	151	0	Glyma.01G135200	Glyma.01G135200.1 dsid=glyma.Wm82.gnm4.ann1.Glyma.01G135200.1 pacid=41117369 polypeptide=Glyma.01G135200.1.p locus=Glyma.01G135200 ID=Glyma.01G135200.1.Wm82.a4.v1 annot-version=Wm82.a4.v1	Glycine max	100	121	2.78×10-58	1
ss715580409	-0.000417604	0.000417604	146	0	Glyma.01G204600	Glyma.01G204600.1 dsid=glyma.Wm82.gnm4.ann1.Glyma.01G204600.1 pacid=41114442 polypeptide=Glyma.01G204600.1.p locus=Glyma.01G204600 ID=Glyma.01G204600.1.Wm82.a4.v1 annot-version=Wm82.a4.v1	Glycine max	42	51	2.28×10-19	1
ss715579380	-0.000418158	0.000418158	143	0	Glyma.19G105000	Glyma.19G105000.1 dsid=glyma.Wm82.gnm4.ann1.Glyma.19G105000.1 pacid=41161592 polypeptide=Glyma.19G105000.1.p locus=Glyma.19G105000 ID=Glyma.19G105000.1.Wm82.a4.v1 annot-version=Wm82.a4.v1	Glycine max	98	104	7.85×10-49	0.958
ss715579389	-0.000418239	0.000418239	142	0	Glyma.01G123000	Glyma.01G123000.1 dsid=glyma.Wm82.gnm4.ann1.Glyma.01G123000.1 pacid=41115259 polypeptide=Glyma.01G123000.1.p locus=Glyma.01G123000 ID=Glyma.01G123000.1.Wm82.a4.v1 annot-version=Wm82.a4.v1	Glycine max	57	69	2.24×10-29	1
ss715580501	-0.000418822	0.000418822	139	0	Glyma.01G219300	Glyma.01G219300.1 dsid=glyma.Wm82.gnm4.ann1.Glyma.01G219300.1 pacid=41115817 polypeptide=Glyma.01G219300.1.p locus=Glyma.01G219300 ID=Glyma.01G219300.1.Wm82.a4.v1 annot-version=Wm82.a4.v1	Glycine max	90	109	1.30×10-51	1
ss715584063	-0.000421791	0.000421791	129	0	Glyma.02G008900	Glyma.02G008900.1 dsid=glyma.Wm82.gnm4.ann1.Glyma.02G008900.1 pacid=41094168 polypeptide=Glyma.02G008900.1.p locus=Glyma.02G008900 ID=Glyma.02G008900.1.Wm82.a4.v1 annot-version=Wm82.a4.v1	Glycine max	100	121	2.78×10-58	1
ss715579384	-0.000421942	0.000421942	128	0	Glyma.15G162900	Glyma.15G162900.3 dsid=glyma.Wm82.gnm4.ann1.Glyma.15G162900.3 pacid=41121490 polypeptide=Glyma.15G162900.3.p locus=Glyma.15G162900 ID=Glyma.15G162900.3.Wm82.a4.v1 annot-version=Wm82.a4.v1	Glycine max	82	66	1.04×10-27	0.89
ss715579582	-0.000422378	0.000422378	122	0	Glyma.01G142000	Glyma.01G142000.1 dsid=glyma.Wm82.gnm4.ann1.Glyma.01G142000.1 pacid=41114194 polypeptide=Glyma.01G142000.1.p locus=Glyma.01G142000 ID=Glyma.01G142000.1.Wm82.a4.v1 annot-version=Wm82.a4.v1	Glycine max	100	121	2.78×10-58	1
ss715580716	-0.000424756	0.000424756	119	0	Glyma.01G244200	Glyma.01G244200.2 dsid=glyma.Wm82.gnm4.ann1.Glyma.01G244200.2 pacid=41117123 polypeptide=Glyma.01G244200.2.p locus=Glyma.01G244200 ID=Glyma.01G244200.2.Wm82.a4.v1 annot-version=Wm82.a4.v1	Glycine max	100	121	2.78×10-58	1
ss715580429	-0.00042504	0.00042504	118	0	Glyma.11G033200	Glyma.11G033200.4 dsid=glyma.Wm82.gnm4.ann1.Glyma.11G033200.4 pacid=41128268 polypeptide=Glyma.11G033200.4.p locus=Glyma.11G033200 ID=Glyma.11G033200.4.Wm82.a4.v1 annot-version=Wm82.a4.v1	Glycine max	26	32	8.31×10-9	1
ss715579127	-0.000430561	0.000430561	109	0	Glyma.01G034300	Glyma.01G034300.1 dsid=glyma.Wm82.gnm4.ann1.Glyma.01G034300.1 pacid=41115630 polypeptide=Glyma.01G034300.1.p locus=Glyma.01G034300 ID=Glyma.01G034300.1.Wm82.a4.v1 annot-version=Wm82.a4.v1	Glycine max	62	75	1.04×10-32	1
ss715579534	-0.000439145	0.000439145	95	0	Glyma.01G004800	Glyma.01G004800.9 dsid=glyma.Wm82.gnm4.ann1.Glyma.01G004800.9 pacid=41114733 polypeptide=Glyma.01G004800.9.p locus=Glyma.01G004800 ID=Glyma.01G004800.9.Wm82.a4.v1 annot-version=Wm82.a4.v1	Glycine max	100	121	2.78×10-58	1
ss715579742	-0.000439439	0.000439439	93	0	Glyma.01G149700	Glyma.01G149700.1 dsid=glyma.Wm82.gnm4.ann1.Glyma.01G149700.1 pacid=41114368 polypeptide=Glyma.01G149700.1.p locus=Glyma.01G149700 ID=Glyma.01G149700.1.Wm82.a4.v1 annot-version=Wm82.a4.v1	Glycine max	100	121	2.78×10-58	1
ss715578461	-0.000439709	0.000439709	92	0	Glyma.01G013300	Glyma.01G013300.1 dsid=glyma.Wm82.gnm4.ann1.Glyma.01G013300.1 pacid=41116582 polypeptide=Glyma.01G013300.1.p locus=Glyma.01G013300 ID=Glyma.01G013300.1.Wm82.a4.v1 annot-version=Wm82.a4.v1	Glycine max	100	121	2.78×10-58	1
ss715579770	-0.000443181	0.000443181	89	0	Glyma.01G152000	Glyma.01G152000.1 dsid=glyma.Wm82.gnm4.ann1.Glyma.01G152000.1 pacid=41116972 polypeptide=Glyma.01G152000.1.p locus=Glyma.01G152000 ID=Glyma.01G152000.1.Wm82.a4.v1 annot-version=Wm82.a4.v1	Glycine max	100	121	2.78×10-58	1
ss715581449	-0.000443914	0.000443914	88	0	Glyma.02G022100	Glyma.02G022100.1 dsid=glyma.Wm82.gnm4.ann1.Glyma.02G022100.1 pacid=41098127 polypeptide=Glyma.02G022100.1.p locus=Glyma.02G022100 ID=Glyma.02G022100.1.Wm82.a4.v1 annot-version=Wm82.a4.v1	Glycine max	100	121	2.78×10-58	1

## Sheet: submitted list 
Glyma.01g001200
Glyma.01g001300
Glyma.01g001300
Glyma.01g001900
Glyma.01g001900
Glyma.01g002501
Glyma.01g002600
Glyma.01g004100
Glyma.01g004800
Glyma.01g005000
Glyma.01g005800
Glyma.01g007000
Glyma.01g009400
Glyma.01g009700
Glyma.01g010400
Glyma.01g011100
Glyma.01g013100
Glyma.01g013300
Glyma.01g013800
Glyma.01g014500
Glyma.01g015500
Glyma.01g015700
Glyma.01g015800
Glyma.01g016100
Glyma.01g016300
Glyma.01g016500
Glyma.01g016700
Glyma.01g016900
Glyma.01g017000
Glyma.01g017150
Glyma.01g018651
Glyma.01g018800
Glyma.01g019400
Glyma.01g021450
Glyma.01g021900
Glyma.01g022500
Glyma.01g022600
Glyma.01g023600
Glyma.01g023767
Glyma.01g024600
Glyma.01g025000
Glyma.01g025200
Glyma.01g025600
Glyma.01g025800
Glyma.01g026200
Glyma.01g026200
Glyma.01g027900
Glyma.01g028800
Glyma.01g029600
Glyma.01g031800
Glyma.01g032500
Glyma.01g033700
Glyma.01g034200
Glyma.01g034300
Glyma.01g034402
Glyma.01g034600
Glyma.01g034800
Glyma.01g035000
Glyma.01g035202
Glyma.01g035400
Glyma.01g035600
Glyma.01g036550
Glyma.01g036700
Glyma.01g036800
Glyma.01g037100
Glyma.01g037200
Glyma.01g038100
Glyma.01g038100
Glyma.01g038400
Glyma.01g038500
Glyma.01g039100
Glyma.01g039700
Glyma.01g042900
Glyma.01g043800
Glyma.01g046300
Glyma.01g052900
Glyma.01g056800
Glyma.01g061800
Glyma.01g063600
Glyma.01g080500
Glyma.01g094300
Glyma.01g097200
Glyma.01g106800
Glyma.01g107951
Glyma.01g112500
Glyma.01g115700
Glyma.01g121400
Glyma.01g123000
Glyma.01g124000
Glyma.01g125100
Glyma.01g127900
Glyma.01g135200
Glyma.01g136300
Glyma.01g139666
Glyma.01g142000
Glyma.01g146600
Glyma.01g148600
Glyma.01g149700
Glyma.01g150800
Glyma.01g152000
Glyma.01g152000
Glyma.01g152600
Glyma.01g153300
Glyma.01g153400
Glyma.01g155000
Glyma.01g155200
Glyma.01g157400
Glyma.01g161900
Glyma.01g162600
Glyma.01g163300
Glyma.01g164000
Glyma.01g164500
Glyma.01g164700
Glyma.01g164800
Glyma.01g167200
Glyma.01g167400
Glyma.01g169800
Glyma.01g170700
Glyma.01g171300
Glyma.01g175300
Glyma.01g179400
Glyma.01g180600
Glyma.01g181600
Glyma.01g182000
Glyma.01g182600
Glyma.01g186600
Glyma.01g187400
Glyma.01g187400
Glyma.01g190600
Glyma.01g191300
Glyma.01g192900
Glyma.01g193200
Glyma.01g193500
Glyma.01g196300
Glyma.01g197600
Glyma.01g198900
Glyma.01g199600
Glyma.01g204600
Glyma.01g204700
Glyma.01g204800
Glyma.01g206600
Glyma.01g209100
Glyma.01g209900
Glyma.01g210700
Glyma.01g212500
Glyma.01g213100
Glyma.01g213500
Glyma.01g213500
Glyma.01g213900
Glyma.01g216000
Glyma.01g216200
Glyma.01g217100
Glyma.01g217100
Glyma.01g217500
Glyma.01g218100
Glyma.01g219300
Glyma.01g219800
Glyma.01g220900
Glyma.01g222700
Glyma.01g223300
Glyma.01g223400
Glyma.01g223500
Glyma.01g224000
Glyma.01g224300
Glyma.01g226000
Glyma.01g227200
Glyma.01g227300
Glyma.01g227700
Glyma.01g229400
Glyma.01g229500
Glyma.01g230850
Glyma.01g231000
Glyma.01g231800
Glyma.01g232100
Glyma.01g233100
Glyma.01g233400
Glyma.01g233500
Glyma.01g234300
Glyma.01g235000
Glyma.01g235100
Glyma.01g235600
Glyma.01g239800
Glyma.01g241200
Glyma.01g244200
Glyma.01g245600
Glyma.02g001700
Glyma.02g001800
Glyma.02g002000
Glyma.02g003700
Glyma.02g004100
Glyma.02g004600
Glyma.02g004800
Glyma.02g005100
Glyma.02g006000
Glyma.02g006100
Glyma.02g006500
Glyma.02g006700
Glyma.02g006900
Glyma.02g008900
Glyma.02g011200
Glyma.02g011900
Glyma.02g015300
Glyma.02g015700
Glyma.02g016500
Glyma.02g016600
Glyma.02g016800
Glyma.02g017400
Glyma.02g022100
Glyma.02g022200
Glyma.02g023700
Glyma.02g024400
Glyma.02g026500
Glyma.02g026800
Glyma.02g027000
Glyma.02g027800
Glyma.02g030000
Glyma.02g032100
Glyma.02g033400
Glyma.03g022100
Glyma.03g058000
Glyma.03g063900
Glyma.03g245200
Glyma.04g059600
Glyma.05g031000
Glyma.06g085700
Glyma.06g099400
Glyma.07g196000
Glyma.09g070300
Glyma.09g084700
Glyma.09g229800
Glyma.10g010501
Glyma.11g021000
Glyma.11g022900
Glyma.11g033200
Glyma.11g038500
Glyma.11g070900
Glyma.11g074900
Glyma.11g075500
Glyma.11g089700
Glyma.12g116000
Glyma.14g062100
Glyma.15g162900
Glyma.16g159550
Glyma.16g159550
Glyma.16g170300
Glyma.18g074800
Glyma.18g199400
Glyma.19g105000
Glyma.19g220200
Glyma.19g258100
Glyma.20g048800
Glyma.20g128900
Glyma.20g200500

## Sheet: annotation 244 genes 
Descriptions of columns. Numbers indicated in column headers.
(1) Locus ID from Gmax_508_Wm82.a4.v1. Only primary predicted proteins were included in analyses. For more information on gene annotated in this assembly see http://www.phytozome.net/soybean.php.
(2) Top Uniref100 Viridaeplantae BLASTP Hit. Match determined via BLASTP (BLAST version 2.10.0) of Gmax_508_Wm82.a4.v1 primary proteins against sequences with the Viridaeplantae (green plants) within Uniref100 (version 02/1/2020). E-value for the top high scoring pair(HSP) is indicated (cutoff of 1E-6). Percent coverage determined by dividing the length of the top HSP by the length of predicted s…
(3) Top Most Descriptive Uniref100 Viridaeplantae BLASTP Hit. The BLAST report generated above (2) was parsed to eliminate uninformative hits. Hits including the words uncharacterized, putative, related, predicted, orf, expressed or containing Arabidopsis or Rice gene identifiers (AtXgXXXXX, OsXXgXXXXX) were ignored. E-value for the top high scoring pair(HSP) is indicated. Percent coverage determ…
(4) Top Arabidopsis (TAIR10) BLASTP Hit (4). Match determined via BLASTP (BLAST version 2.10.0) of Gmax_508_Wm82.a4.v1 primary proteins against Arabidopsis thaliana proteins in TAIR10 (TAIR10_pep_20110103_representative_gene_model_updated). An E-value cutoff of 1E-10 was used. For additional details see www.arabidopsis.org. E-value for the top high scoring pair(HSP) is indicated. Percent coverage…
(5) Gene Ontology Biological Process IDs. GO Biological Process IDs were assigned to each Gmax_508_Wm82.a4.v1 ID using the GO terms associated with the Top TAIR10 BLASTP Hit (4). The annotation information was obtained from TAIR10 (03/01/20). Descriptions for the GO terms are also provided.
(6) Gene Ontology Molecular Function IDs. GO Molecular Function IDs were assigned to each Gmax_508_Wm82.a4.v1 ID using the GO terms associated with the Top TAIR10 BLASTP Hit (4). The annotation information was obtained from TAIR10 (03/01/20). Descriptions for the GO terms are also provided.
(7)Gene Ontology Cellular Component IDs. GO Cellular Component IDs were assigned to each Gmax_508_Wm82.a4.v1 ID using the GO terms associated with the Top TAIR10 BLASTP Hit (4). The annotation information was obtained from TAIR10 (03/01/20). Descriptions for the GO terms are also provided.
(8) PFAM IDs and descriptions were assigned by Phytozome. For more information see http://www.phytozome.net/soybean.php.
(9) Alternative TAIR10 IDs were determined by querying the TAIR10 gene association file (01012020) by the Arabidopsis gene ID (AtXGXXXXX).
Gmax_508_Wm82.a4.v1 Locus (1)	Length of Primary Predicted Protein (AA)	Top Uniref100 Viridaeplantae Hit (2)	Best HSP Evalue (E<10-6)	Best HSP Percent Coverage	Top Most Descriptive Uniref100 Viridaeplantae Hit (3)	Best HSP Evalue (E<10-6)	Best HSP Percent Coverage	Top Arabidopsis (TAIR10) BLASTP Hit (4)	Best HSP Evalue (E<10-10)	Best HSP Percent Coverage	GO Biological Process IDs (5)	GO Biological Process Descriptions	GO Molecular Function IDs (6)	GO Molecular Function Descriptions	GO Cellular Component IDs (7)	GO Cellular Component Descriptions	PFAM IDs (8)	PFAM Names	Alternative TAIR10 IDs (9)
Glyma.01g001200	806	UniRef100_I1J4A1 TOG domain-containing protein n=2 Tax=Soja TaxID=1462606 RepID=I1J4A1_SOYBN	0	99.88	UniRef100_I1J4A1 TOG domain-containing protein n=2 Tax=Soja TaxID=1462606 RepID=I1J4A1_SOYBN	0	99.88	AT2G07170.1 | Symbols: | ARM repeat superfamily protein | chr2:2975565-2978692 FORWARD LENGTH=820	0	98.26	NA	NA	GO:0008017	microtubule binding;	GO:0005634	nucleus	NA	NA	AT2G07170
Glyma.01g001300	758	UniRef100_A0A0R4J2H1 Terpene cyclase/mutase family member n=1 Tax=Glycine max TaxID=3847 RepID=A0A0R4J2H1_SOYBN	0	99.87	UniRef100_A0A0R4J2H1 Terpene cyclase/mutase family member n=1 Tax=Glycine max TaxID=3847 RepID=A0A0R4J2H1_SOYBN	0	99.87	AT2G07050.1 | Symbols: CAS1 | cycloartenol synthase 1 | chr2:2924629-2930295 FORWARD LENGTH=759	0	99.47	GO:0009555 GO:0010027 GO:0019745	pollen development; thylakoid membrane organization; pentacyclic triterpenoid biosynthetic process;	GO:0000250 GO:0016871 GO:0042300	lanosterol synthase activity; cycloartenol synthase activity; beta-amyrin synthase activity;	GO:0005739 GO:0005773 GO:0005811	mitochondrion; vacuole; lipid droplet	PF00432	Prenyltrans;	AT2G07050|CAS1|cycloartenol synthase 1|T4E14.16|T4E14_16|cycloartenol synthase 1
Glyma.01g001900	799	UniRef100_A0A0R0L4D0 Protein kinase domain-containing protein n=1 Tax=Glycine max TaxID=3847 RepID=A0A0R0L4D0_SOYBN	0	99.87	UniRef100_A0A0R0L4D0 Protein kinase domain-containing protein n=1 Tax=Glycine max TaxID=3847 RepID=A0A0R0L4D0_SOYBN	0	99.87	AT2G24370.1 | Symbols: | Protein kinase protein with adenine nucleotide alpha hydrolases-like domain | chr2:10369979-10373063 REVERSE LENGTH=788	0	90.99	GO:0006468	protein phosphorylation;	GO:0004672 GO:0005524 GO:0016787	protein kinase activity; ATP binding; hydrolase activity;	GO:0005634	nucleus	PF00582 PF00069	Usp; Pkinase;	AT2G24370|T28I24.10|T28I24_10
Glyma.01g002501	129	UniRef100_A0A445LWX7 Protein OSB2, chloroplastic isoform B n=3 Tax=Glycine soja TaxID=3848 RepID=A0A445LWX7_GLYSO	9e-66	79.84	UniRef100_A0A445LWX7 Protein OSB2, chloroplastic isoform B n=3 Tax=Glycine soja TaxID=3848 RepID=A0A445LWX7_GLYSO	9e-66	79.84	NA	NA	NA	NA	NA	NA	NA	NA	NA	NA	NA	AT5G44785|OSB3|organellar single-stranded DNA binding protein 3
Glyma.01g002600	463	UniRef100_I1J4B5 Uncharacterized protein n=2 Tax=Soja TaxID=1462606 RepID=I1J4B5_SOYBN	0	99.78	UniRef100_A0A445LWW9 Ectonucleotide pyrophosphatase/phosphodiesterase family member 3 n=1 Tax=Glycine soja TaxID=3848 RepID=A0A445LWW9_GLYSO	0	99.78	AT4G29680.1 | Symbols: | Alkaline-phosphatase-like family protein | chr4:14538067-14539557 REVERSE LENGTH=496	0	86.18	NA	NA	GO:0035529 GO:0047429	NADH pyrophosphatase activity; nucleoside-triphosphate diphosphatase activity;	GO:0005634 GO:0005773 GO:0016020 GO:0016021	nucleus; vacuole; membrane; integral component of membrane	PF01663	Phosphodiest;	AT4G29680
Glyma.01g004100	1065	UniRef100_K7K129 Uncharacterized protein n=1 Tax=Glycine max TaxID=3847 RepID=K7K129_SOYBN	0	99.91	UniRef100_A0A445LX04 IST1-like protein isoform A n=1 Tax=Glycine soja TaxID=3848 RepID=A0A445LX04_GLYSO	0	99.91	AT2G19710.1 | Symbols: | Regulator of Vps4 activity in the MVB pathway protein | chr2:8506339-8509817 FORWARD LENGTH=937	3e-98	33.24	GO:0008104	protein localization;	NA	NA	GO:0005634	nucleus	PF03398	Ist1;	AT2G19710|ISTL5|IST1-LIKE 5|F6F22.26|F6F22_26
Glyma.01g004800	902	UniRef100_K7K137 Protein kinase domain-containing protein n=1 Tax=Glycine max TaxID=3847 RepID=K7K137_SOYBN	0	99.89	UniRef100_K7K137 Protein kinase domain-containing protein n=1 Tax=Glycine max TaxID=3847 RepID=K7K137_SOYBN	0	99.89	AT4G29180.2 | Symbols: RHS16 | root hair specific 16 | chr4:14385631-14389524 FORWARD LENGTH=913	0	97.56	GO:0006468 GO:0016310	protein phosphorylation; phosphorylation;	GO:0004674 GO:0005515 GO:0005524 GO:0016301	protein serine/threonine kinase activity; protein binding; ATP binding; kinase activity;	GO:0005576 GO:0016021	extracellular region; integral component of membrane	PF13855 PF07714 PF12819 PF00560 PF12819 PF00560 PF07714	LRR_8; Pkinase_Tyr; Malectin_like; LRR_1; Malectin_like; LRR_1; Pkinase_Tyr;	AT4G29180|RHS16|root hair specific 16|F19B15.210|F19B15_210
Glyma.01g005000	351	UniRef100_I1J4E8 Uncharacterized protein n=1 Tax=Glycine max TaxID=3847 RepID=I1J4E8_SOYBN	0	99.72	UniRef100_A0A445LWW4 Zinc finger CCCH domain-containing protein 20 n=1 Tax=Glycine soja TaxID=3848 RepID=A0A445LWW4_GLYSO	0	99.72	AT2G19810.1 | Symbols: | CCCH-type zinc finger family protein | chr2:8550419-8551498 FORWARD LENGTH=359	1e-133	99.43	GO:0006355 GO:0006979	regulation of transcription, DNA-templated; response to oxidative stress;	GO:0003677 GO:0003700 GO:0046872	DNA binding; DNA-binding transcription factor activity; metal ion binding;	GO:0005634 GO:0005886	nucleus; plasma membrane	PF00642	zf-CCCH;	AT2G19810|OZF1|AtOZF1|AtTZF2|TZF2|Oxidation-related Zinc Finger 1|tandem zinc finger 2|F6F22.16|F6F22_16
Glyma.01g005800	429	UniRef100_I1J4G3 Uncharacterized protein n=1 Tax=Glycine max TaxID=3847 RepID=I1J4G3_SOYBN	0	99.77	UniRef100_UPI00101614C9 uncharacterized protein LOC114181015 n=1 Tax=Vigna unguiculata TaxID=3917 RepID=UPI00101614C9	0	99.77	AT4G29310.1 | Symbols: | Protein of unknown function (DUF1005) | chr4:14437892-14439609 REVERSE LENGTH=424	0	98.6	GO:0008150	biological process;	GO:0003674	molecular function;	GO:0005634	nucleus	PF06219	DUF1005;	AT4G29310|F17A13.130|F17A13_130
Glyma.01g007000	421	UniRef100_A0A445LX11 Protein IQ-DOMAIN 31 isoform A n=3 Tax=Soja TaxID=1462606 RepID=A0A445LX11_GLYSO	0	99.76	UniRef100_A0A445LX11 Protein IQ-DOMAIN 31 isoform A n=3 Tax=Soja TaxID=1462606 RepID=A0A445LX11_GLYSO	0	99.76	AT3G16490.1 | Symbols: IQD26 | IQ-domain 26 | chr3:5603962-5605489 REVERSE LENGTH=389	4e-90	93.82	GO:0008150	biological process;	NA	NA	GO:0005634	nucleus	PF00612 PF13178	IQ; DUF4005;	AT3G16490|IQD26|IQ-domain 26|MDC8.12
Glyma.01g009400	951	UniRef100_I1J4K7 Uncharacterized protein n=2 Tax=Soja TaxID=1462606 RepID=I1J4K7_SOYBN	0	99.89	UniRef100_A0A445LX64 Protein unc-13-like isoform A n=1 Tax=Glycine soja TaxID=3848 RepID=A0A445LX64_GLYSO	0	99.89	AT2G25800.1 | Symbols: | Protein of unknown function (DUF810) | chr2:11006138-11009728 REVERSE LENGTH=987	0	98	GO:0006414	translational elongation;	GO:0003746	translation elongation factor activity;	GO:0009507	chloroplast	PF05664	DUF810;	AT2G25800|F17H15.17|F17H15_17
Glyma.01g009700	538	UniRef100_I1J4L0 Uncharacterized protein n=1 Tax=Glycine max TaxID=3847 RepID=I1J4L0_SOYBN	0	99.81	UniRef100_UPI000F7C166C uncharacterized protein LOC113869607 n=1 Tax=Abrus precatorius TaxID=3816 RepID=UPI000F7C166C	0	99.81	NA	NA	NA	NA	NA	NA	NA	NA	NA	NA	NA	NA
Glyma.01g010400	538	UniRef100_I1J4L9 Uncharacterized protein n=1 Tax=Glycine max TaxID=3847 RepID=I1J4L9_SOYBN	0	99.81	UniRef100_A0A445LX48 DEAD-box ATP-dependent RNA helicase 5 n=1 Tax=Glycine soja TaxID=3848 RepID=A0A445LX48_GLYSO	0	99.81	AT1G31970.1 | Symbols: STRS1 | DEA(D/H)-box RNA helicase family protein | chr1:11479921-11482707 FORWARD LENGTH=537	0	80.86	GO:0006364	rRNA processing;	GO:0003723 GO:0003724 GO:0005524	RNA binding; RNA helicase activity; ATP binding;	GO:0005634 GO:0005730 GO:0005829	nucleus; nucleolus; cytosol	PF00271 PF00270	Helicase_C; DEAD;	AT1G31970|STRS1|RH5|STRESS RESPONSE SUPPRESSOR 1|F5M6.3
Glyma.01g011100	387	UniRef100_C6THL8 PCI domain-containing protein n=2 Tax=Soja TaxID=1462606 RepID=C6THL8_SOYBN	0	99.74	UniRef100_C6THL8 PCI domain-containing protein n=2 Tax=Soja TaxID=1462606 RepID=C6THL8_SOYBN	0	99.74	AT4G19006.1 | Symbols: | Proteasome component (PCI) domain protein | chr4:10409349-10411347 REVERSE LENGTH=386	0	99.74	GO:0006511 GO:0030163 GO:0043248	ubiquitin-dependent protein catabolic process; protein catabolic process; proteasome assembly;	GO:0005198	structural molecule activity;	GO:0000502 GO:0005634 GO:0005829 GO:0008541	proteasome complex; nucleus; cytosol; proteasome regulatory particle, lid subcomplex	PF01399	PCI;	AT4G19006
Glyma.01g013100	1083	UniRef100_K7K174 Uncharacterized protein n=1 Tax=Glycine max TaxID=3847 RepID=K7K174_SOYBN	0	99.91	UniRef100_K7K166 NB-ARC domain-containing protein n=1 Tax=Glycine max TaxID=3847 RepID=K7K166_SOYBN	0	99.26	AT3G14470.1 | Symbols: | NB-ARC domain-containing disease resistance protein | chr3:4857940-4861104 FORWARD LENGTH=1054	3e-69	88.83	GO:0006952	defense response;	GO:0005515 GO:0005524 GO:0043531	protein binding; ATP binding; ADP binding;	GO:0005576	extracellular region	PF13855 PF00931	LRR_8; NB-ARC;	AT3G14470|MOA2.9
Glyma.01g013300	752	UniRef100_K7K176 ANK_REP_REGION domain-containing protein n=1 Tax=Glycine max TaxID=3847 RepID=K7K176_SOYBN	0	99.87	UniRef100_K7K176 ANK_REP_REGION domain-containing protein n=1 Tax=Glycine max TaxID=3847 RepID=K7K176_SOYBN	0	99.87	AT3G18670.1 | Symbols: | Ankyrin repeat family protein | chr3:6424135-6426471 REVERSE LENGTH=598	7e-87	44.02	NA	NA	NA	NA	GO:0005737 GO:0005739 GO:0016020 GO:0016021	cytoplasm; mitochondrion; membrane; integral component of membrane	PF12796 PF14244 PF13962	Ank_2; Retrotran_gag_3; PGG;	AT3G18670
Glyma.01g013800	562	UniRef100_I1J4Q0 J domain-containing protein n=1 Tax=Glycine max TaxID=3847 RepID=I1J4Q0_SOYBN	0	99.82	UniRef100_I1J4Q0 J domain-containing protein n=1 Tax=Glycine max TaxID=3847 RepID=I1J4Q0_SOYBN	0	99.82	AT2G35540.1 | Symbols: | DNAJ heat shock N-terminal domain-containing protein | chr2:14927158-14928930 FORWARD LENGTH=590	9e-130	99.11	NA	NA	NA	NA	GO:0005737	cytoplasm	PF00226 PF11926	DnaJ; DUF3444;	AT2G35540
Glyma.01g014500	308	UniRef100_I1J4R1 Uncharacterized protein n=4 Tax=Soja TaxID=1462606 RepID=I1J4R1_SOYBN	0	99.68	UniRef100_A0A1S3VP77 uncharacterized protein LOC106777091 n=1 Tax=Vigna radiata var. radiata TaxID=3916 RepID=A0A1S3VP77_VIGRR	1e-164	99.35	NA	NA	NA	NA	NA	NA	NA	NA	NA	NA	NA	NA
Glyma.01g015500	280	UniRef100_I1J4S9 RRM domain-containing protein n=2 Tax=Soja TaxID=1462606 RepID=I1J4S9_SOYBN	0	99.64	UniRef100_I1J4S9 RRM domain-containing protein n=2 Tax=Soja TaxID=1462606 RepID=I1J4S9_SOYBN	0	99.64	AT4G17720.1 | Symbols: | RNA-binding (RRM/RBD/RNP motifs) family protein | chr4:9862660-9864498 REVERSE LENGTH=313	2e-131	95	GO:0006364 GO:0034051 GO:0050832 GO:0071226	rRNA processing; negative regulation of plant-type hypersensitive response; defense response to fungus; cellular response to molecule of fungal origin;	NA	NA	GO:0005634 GO:0005829 GO:0005886	nucleus; cytosol; plasma membrane	PF00076	RRM_1;	AT4G17720|BPL1|IRP3|BPA1-Like 1|INVOLVED IN rRNA PROCESSING 3|DL4895C|FCAALL.73
Glyma.01g015700	115	UniRef100_A0A0R0L562 Uncharacterized protein n=1 Tax=Glycine max TaxID=3847 RepID=A0A0R0L562_SOYBN	7e-77	99.13	UniRef100_A0A445LXG0 Protein SAMBA isoform D n=1 Tax=Glycine soja TaxID=3848 RepID=A0A445LXG0_GLYSO	3e-76	99.13	AT1G32310.1 | Symbols: | unknown protein; Has 28 Blast hits to 28 proteins in 9 species: Archae - 0; Bacteria - 0; Metazoa - 0; Fungi - 0; Plants - 28; Viruses - 0; Other Eukaryotes - 0 (source: NCBI BLink). | chr1:11653619-11654538 FORWARD LENGTH=100	1e-31	81.74	GO:0009555 GO:0009556 GO:0045732 GO:0046621	pollen development; microsporogenesis; positive regulation of protein catabolic process; negative regulation of organ growth;	GO:0005515 GO:0010997	protein binding; anaphase-promoting complex binding;	NA	NA	NA	NA	AT1G32310|SAMBA|SAMBA|F27G20.14
Glyma.01g015800	338	UniRef100_I1J4T3 Protein kinase domain-containing protein n=3 Tax=Soja TaxID=1462606 RepID=I1J4T3_SOYBN	0	99.7	UniRef100_I1J4T3 Protein kinase domain-containing protein n=3 Tax=Soja TaxID=1462606 RepID=I1J4T3_SOYBN	0	99.7	AT1G32320.1 | Symbols: ATMKK10, MKK10 | MAP kinase kinase 10 | chr1:11655156-11656073 FORWARD LENGTH=305	1e-108	93.49	GO:0000165 GO:0000187 GO:0007346 GO:0023014 GO:0031098 GO:0032147	MAPK cascade; activation of MAPK activity; regulation of mitotic cell cycle; signal transduction by protein phosphorylation; stress-activated protein kinase signaling cascade; activation of protein kinase activity;	GO:0004674 GO:0004708 GO:0005524	protein serine/threonine kinase activity; MAP kinase kinase activity; ATP binding;	GO:0005737	cytoplasm	PF14531	Kinase-like;	AT1G32320|ATMKK10|MKK10|MAP kinase kinase 10|F27G20.9
Glyma.01g016100	735	UniRef100_K7K197 Uncharacterized protein n=1 Tax=Glycine max TaxID=3847 RepID=K7K197_SOYBN	0	99.86	UniRef100_A0A445LXI5 Pentatricopeptide repeat-containing protein, mitochondrial isoform A n=1 Tax=Glycine soja TaxID=3848 RepID=A0A445LXI5_GLYSO	0	99.73	AT1G05670.1 | Symbols: | Pentatricopeptide repeat (PPR-like) superfamily protein | chr1:1698574-1700799 REVERSE LENGTH=741	1e-83	80.54	NA	NA	GO:0016757	transferase activity, transferring glycosyl groups;	GO:0005739 GO:0005783 GO:0005794	mitochondrion; endoplasmic reticulum; Golgi apparatus	PF01535 PF12854 PF13041	PPR; PPR_1; PPR_2;	AT1G05670
Glyma.01g016300	175	UniRef100_A0A445LXJ7 RWD domain-containing protein n=3 Tax=Soja TaxID=1462606 RepID=A0A445LXJ7_GLYSO	9e-125	99.43	UniRef100_A0A445LXJ7 RWD domain-containing protein n=3 Tax=Soja TaxID=1462606 RepID=A0A445LXJ7_GLYSO	9e-125	99.43	AT1G32340.1 | Symbols: NHL8 | NDR1/HIN1-like 8 | chr1:11663462-11666037 REVERSE LENGTH=688	8e-18	50.86	GO:0000209 GO:0006511 GO:0032436	protein polyubiquitination; ubiquitin-dependent protein catabolic process; positive regulation of proteasomal ubiquitin-dependent protein catabolic process;	GO:0031624 GO:0046872 GO:0061630	ubiquitin conjugating enzyme binding; metal ion binding; ubiquitin protein ligase activity;	GO:0000151 GO:0005634 GO:0005737	ubiquitin ligase complex; nucleus; cytoplasm	PF05773	RWD;	AT1G32340|NHL8|NDR1/HIN1-like 8|F27G20.5
Glyma.01g016500	1247	UniRef100_I1J4T8 Uncharacterized protein n=1 Tax=Glycine max TaxID=3847 RepID=I1J4T8_SOYBN	0	99.92	UniRef100_A0A0B2P6C0 ABC transporter B family member 2 n=3 Tax=Glycine soja TaxID=3848 RepID=A0A0B2P6C0_GLYSO	0	99.92	AT4G25960.1 | Symbols: PGP2 | P-glycoprotein 2 | chr4:13177438-13183425 FORWARD LENGTH=1273	0	99.2	GO:0055085	transmembrane transport;	GO:0005524 GO:0016887 GO:0042626	ATP binding; ATPase activity; ATPase-coupled transmembrane transporter activity;	GO:0005829 GO:0009507 GO:0016021	cytosol; chloroplast; integral component of membrane	PF00005 PF00664 PF00664 PF00005	ABC_tran; ABC_membrane; ABC_membrane; ABC_tran;	AT4G25960|PGP2|ABCB2|P-glycoprotein 2|ATP-binding cassette B2|F20B18.70|F20B18_70
Glyma.01g016700	358	UniRef100_K7K1A2 Inositol-tetrakisphosphate 1-kinase n=1 Tax=Glycine max TaxID=3847 RepID=K7K1A2_SOYBN	0	99.72	UniRef100_K7K1A2 Inositol-tetrakisphosphate 1-kinase n=1 Tax=Glycine max TaxID=3847 RepID=K7K1A2_SOYBN	0	99.72	AT5G16760.1 | Symbols: | Inositol 1,3,4-trisphosphate 5/6-kinase family protein | chr5:5509890-5510849 FORWARD LENGTH=319	2e-115	84.08	GO:0010264 GO:0032957 GO:0052746	myo-inositol hexakisphosphate biosynthetic process; inositol trisphosphate metabolic process; inositol phosphorylation;	GO:0000287 GO:0005524 GO:0047325 GO:0052725 GO:0052726	magnesium ion binding; ATP binding; inositol tetrakisphosphate 1-kinase activity; inositol-1,3,4-trisphosphate 6-kinase activity; inositol-1,3,4-trisphosphate 5-kinase activity;	GO:0005737 GO:0005829	cytoplasm; cytosol	PF05770	Ins134_P3_kin;	AT5G16760|ITPK1|AtITPK1|inositol 1,3,4-trisphosphate 5/6 kinase 1|Arabidopsis thaliana inositol 1,3,4-trisphosphate 5/6 kinase 1|F5E19.100|F5E19_100|INOSITOL 1,3,4-TRISPHOSPHATE 5/6-KINASE
Glyma.01g016900	516	UniRef100_I1J4U2 Uncharacterized protein n=1 Tax=Glycine max TaxID=3847 RepID=I1J4U2_SOYBN	0	99.81	UniRef100_A0A445LXK5 RNA-binding protein 34 n=2 Tax=Glycine soja TaxID=3848 RepID=A0A445LXK5_GLYSO	0	99.81	AT5G46840.1 | Symbols: | RNA-binding (RRM/RBD/RNP motifs) family protein | chr5:19005651-19007609 FORWARD LENGTH=501	7e-141	99.42	NA	NA	NA	NA	GO:0005737	cytoplasm	PF14259 PF00076	RRM_1;	AT5G46840
Glyma.01g017000	292	UniRef100_K7K1A3 TPR_REGION domain-containing protein n=2 Tax=Glycine max TaxID=3847 RepID=K7K1A3_SOYBN	0	99.66	UniRef100_K7K1A3 TPR_REGION domain-containing protein n=2 Tax=Glycine max TaxID=3847 RepID=K7K1A3_SOYBN	0	99.66	AT4G17940.1 | Symbols: | Tetratricopeptide repeat (TPR)-like superfamily protein | chr4:9965787-9966778 FORWARD LENGTH=274	4e-53	78.42	GO:0008150	biological process;	NA	NA	GO:0009507	chloroplast	NA	NA	AT4G17940|T6K21.120|T6K21_120
Glyma.01g017150	109	UniRef100_A0A445KI42 Uncharacterized protein n=1 Tax=Glycine soja TaxID=3848 RepID=A0A445KI42_GLYSO	5e-54	98.17	UniRef100_UPI0003DE8886 shootin-1 isoform X4 n=1 Tax=Glycine max TaxID=3847 RepID=UPI0003DE8886	9e-54	98.17	NA	NA	NA	NA	NA	NA	NA	NA	NA	NA	NA	AT5G07890
Glyma.01g018651	46	NA	NA	NA	NA	NA	NA	NA	NA	NA	NA	NA	NA	NA	NA	NA	NA	NA	NA
Glyma.01g018800	222	UniRef100_I1J4W0 Uncharacterized protein n=2 Tax=Soja TaxID=1462606 RepID=I1J4W0_SOYBN	6e-162	99.55	UniRef100_A0A445J3R6 Abscisic acid receptor PYR1 n=1 Tax=Glycine soja TaxID=3848 RepID=A0A445J3R6_GLYSO	9e-149	99.55	AT5G46790.1 | Symbols: PYL1, RCAR12 | PYR1-like 1 | chr5:18984063-18984728 REVERSE LENGTH=221	1e-92	92.79	GO:0006952 GO:0009738 GO:0080163	defense response; abscisic acid-activated signaling pathway; regulation of protein serine/threonine phosphatase activity;	GO:0004864 GO:0005515 GO:0010427 GO:0038023 GO:0042802 GO:0042803	protein phosphatase inhibitor activity; protein binding; abscisic acid binding; signaling receptor activity; identical protein binding; protein homodimerization activity;	GO:0005634 GO:0005737 GO:0005886 GO:0009536	nucleus; cytoplasm; plasma membrane; plastid	PF10604	Polyketide_cyc2;	AT5G46790|PYL1|RCAR12|PYR1-like 1|regulatory components of ABA receptor 12|MZA15.21|MZA15_21
Glyma.01g019400	360	UniRef100_A0A445LXN5 Auxin-induced protein n=7 Tax=Soja TaxID=1462606 RepID=A0A445LXN5_GLYSO	0	99.72	UniRef100_A0A445LXN5 Auxin-induced protein n=7 Tax=Soja TaxID=1462606 RepID=A0A445LXN5_GLYSO	0	99.72	AT2G22670.4 | Symbols: IAA8 | indoleacetic acid-induced protein 8 | chr2:9636877-9638459 FORWARD LENGTH=338	4e-145	88.89	GO:0006355 GO:0009733 GO:0009734 GO:0010311 GO:0045892 GO:1901332	regulation of transcription, DNA-templated; response to auxin; auxin-activated signaling pathway; lateral root formation; negative regulation of transcription, DNA-templated; negative regulation of lateral root development;	GO:0003700 GO:0005515	DNA-binding transcription factor activity; protein binding;	GO:0005634 GO:0005737	nucleus; cytoplasm	PF02309	AUX_IAA;	AT2G22670|IAA8|indoleacetic acid-induced protein 8|T9I22.11|T9I22_11
Glyma.01g021450	416	UniRef100_A0A445LXT2 Pentatricopeptide repeat-containing protein n=2 Tax=Glycine soja TaxID=3848 RepID=A0A445LXT2_GLYSO	0	99.76	UniRef100_A0A445LXT2 Pentatricopeptide repeat-containing protein n=2 Tax=Glycine soja TaxID=3848 RepID=A0A445LXT2_GLYSO	0	99.76	AT5G65560.1 | Symbols: | Pentatricopeptide repeat (PPR) superfamily protein | chr5:26201012-26203759 REVERSE LENGTH=915	6e-108	99.04	GO:0008150	biological process;	GO:0003674	molecular function;	GO:0005739	mitochondrion	PF13041	PPR_2;	AT5G65560|K21L13.7|K21L13_7
Glyma.01g021900	302	UniRef100_K7K1C8 Uncharacterized protein n=1 Tax=Glycine max TaxID=3847 RepID=K7K1C8_SOYBN	0	99.67	UniRef100_A0A4D6LQC3 Glycosyltransferase n=1 Tax=Vigna unguiculata TaxID=3917 RepID=A0A4D6LQC3_VIGUN	2e-151	96.03	AT1G22360.1 | Symbols: AtUGT85A2, UGT85A2 | UDP-glucosyl transferase 85A2 | chr1:7895068-7897527 REVERSE LENGTH=481	1e-39	92.72	NA	NA	GO:0008194 GO:0015020 GO:0016757 GO:0080043 GO:0080044	UDP-glycosyltransferase activity; glucuronosyltransferase activity; transferase activity, transferring glycosyl groups; quercetin 3-O-glucosyltransferase activity; quercetin 7-O-glucosyltransferase activity;	GO:0005634 GO:0043231	nucleus; intracellular membrane-bounded organelle	PF00201	UDPGT;	AT1G22360
Glyma.01g022500	511	UniRef100_I1J503 Uncharacterized protein n=2 Tax=Soja TaxID=1462606 RepID=I1J503_SOYBN	0	99.8	UniRef100_A0A445LXT0 AP2-like ethylene-responsive transcription factor AIL6 isoform B n=1 Tax=Glycine soja TaxID=3848 RepID=A0A445LXT0_GLYSO	0	99.8	AT5G10510.3 | Symbols: AIL6 | AINTEGUMENTA-like 6 | chr5:3315991-3320008 FORWARD LENGTH=604	0	99.8	GO:0006355 GO:0009873 GO:0009887 GO:0009908 GO:0010080 GO:0010311 GO:0010492 GO:0035265 GO:0048364 GO:0060771 GO:0060772 GO:0060774	regulation of transcription, DNA-templated; ethylene-activated signaling pathway; animal organ morphogenesis; flower development; regulation of floral meristem growth; lateral root formation; maintenance of shoot apical meristem identity; organ growth; root development; phyllotactic patterning; leaf phyllotactic patterning; auxin mediated signaling pathway involved in phyllotactic patterning;	GO:0003677 GO:0003700 GO:0005515 GO:0043565 GO:0044212	DNA binding; DNA-binding transcription factor activity; protein binding; sequence-specific DNA binding; transcription regulatory region DNA binding;	GO:0005634	nucleus	PF00847	AP2;	AT5G10510|AIL6|PLT3|AINTEGUMENTA-like 6|PLETHORA 3|F12B17.140|F12B17_140
Glyma.01g022600	802	UniRef100_I1J504 Uncharacterized protein n=1 Tax=Glycine max TaxID=3847 RepID=I1J504_SOYBN	0	99.88	UniRef100_UPI00098DC467 putative U-box domain-containing protein 50 n=1 Tax=Cajanus cajan TaxID=3821 RepID=UPI00098DC467	0	99.75	AT5G65500.1 | Symbols: | U-box domain-containing protein kinase family protein | chr5:26181093-26183997 REVERSE LENGTH=791	0	99.13	GO:0006468 GO:0016567	protein phosphorylation; protein ubiquitination;	GO:0004672 GO:0004842 GO:0005524	protein kinase activity; ubiquitin-protein transferase activity; ATP binding;	GO:0005634	nucleus	PF04564 PF07714	U-box; Pkinase_Tyr;	AT5G65500|K19O4.3|K19O4_3
Glyma.01g023600	1281	UniRef100_I1J515 Kinesin motor domain-containing protein n=2 Tax=Glycine max TaxID=3847 RepID=I1J515_SOYBN	0	99.92	UniRef100_I1J515 Kinesin motor domain-containing protein n=2 Tax=Glycine max TaxID=3847 RepID=I1J515_SOYBN	0	99.92	AT5G10470.2 | Symbols: KAC1 | kinesin like protein for actin based chloroplast movement 1 | chr5:3290121-3297248 REVERSE LENGTH=1274	0	99.14	GO:0000910 GO:0000913 GO:0007018 GO:0009903 GO:0009904 GO:0016032 GO:0031022	cytokinesis; preprophase band assembly; microtubule-based movement; chloroplast avoidance movement; chloroplast accumulation movement; viral process; nuclear migration along microfilament;	GO:0003777 GO:0005515 GO:0005524 GO:0008017 GO:0016887	microtubule motor activity; protein binding; ATP binding; microtubule binding; ATPase activity;	GO:0005622 GO:0005623 GO:0005634 GO:0005694 GO:0005819 GO:0005829 GO:0005871 GO:0005874 GO:0005886 GO:0009504 GO:0009524 GO:0009941	intracellular; cell; nucleus; chromosome; spindle; cytosol; kinesin complex; microtubule; plasma membrane; cell plate; phragmoplast; chloroplast envelope	PF00225	Kinesin;	AT5G10470|KCA1|KAC1|KINESIN CDKA;1 ASSOCIATED 1|kinesin like protein for actin based chloroplast movement 1|F12B17.180|F12B17_180
Glyma.01g023767	266	UniRef100_UPI00023BAE4E uncharacterized protein LOC102669365 n=1 Tax=Glycine max TaxID=3847 RepID=UPI00023BAE4E	0	99.62	UniRef100_UPI00023BAE4E uncharacterized protein LOC102669365 n=1 Tax=Glycine max TaxID=3847 RepID=UPI00023BAE4E	0	99.62	AT5G09540.1 | Symbols: | Chaperone DnaJ-domain superfamily protein | chr5:2962422-2963264 REVERSE LENGTH=280	4e-29	66.92	NA	NA	NA	NA	GO:0005737	cytoplasm	NA	NA	AT5G09540
Glyma.01g024600	209	UniRef100_A0A0R0L5K2 CAAD domain-containing protein n=1 Tax=Glycine max TaxID=3847 RepID=A0A0R0L5K2_SOYBN	4e-140	94.26	UniRef100_A0A0R0L5K2 CAAD domain-containing protein n=1 Tax=Glycine max TaxID=3847 RepID=A0A0R0L5K2_SOYBN	4e-140	94.26	AT4G38100.1 | Symbols: | unknown protein; LOCATED IN: chloroplast thylakoid membrane; EXPRESSED IN: 23 plant structures; EXPRESSED DURING: 13 growth stages; BEST Arabidopsis thaliana protein match is: unknown protein (TAIR:AT4G01150.1); Has 30201 Blast hits to 17322 proteins in 780 species: Archae - 12; Bacteria - 1396; Metazoa - 17338; Fungi - 3422; Plants - 5037; Viruses - 0; Other Eukaryotes -…	1e-43	92.82	NA	NA	NA	NA	GO:0009507 GO:0009535 GO:0016021	chloroplast; chloroplast thylakoid membrane; integral component of membrane	PF14159	CAAD;	AT4G38100
Glyma.01g025000	255	UniRef100_I1J527 ZF-HD dimerization-type domain-containing protein n=3 Tax=Soja TaxID=1462606 RepID=I1J527_SOYBN	0	99.61	UniRef100_I1J527 ZF-HD dimerization-type domain-containing protein n=3 Tax=Soja TaxID=1462606 RepID=I1J527_SOYBN	0	99.61	AT4G24660.1 | Symbols: ATHB22, MEE68, HB22, ZHD2 | homeobox protein 22 | chr4:12724851-12725513 REVERSE LENGTH=220	4e-68	96.86	GO:0009793	embryo development ending in seed dormancy;	GO:0003677 GO:0005515 GO:0042803 GO:0046872	DNA binding; protein binding; protein homodimerization activity; metal ion binding;	GO:0005634	nucleus	PF04770	ZF-HD_dimer;	AT4G24660|ATHB22|MEE68|HB22|ZHD2|HOMEOBOX PROTEIN 22|MATERNAL EFFECT EMBRYO ARREST 68|ZINC FINGER HOMEODOMAIN 2|F22K18.140|F22K18_140
Glyma.01g025200	492	UniRef100_A0A0R0LBR5 Protein DETOXIFICATION n=2 Tax=Soja TaxID=1462606 RepID=A0A0R0LBR5_SOYBN	0	99.8	UniRef100_A0A0R0LBR5 Protein DETOXIFICATION n=2 Tax=Soja TaxID=1462606 RepID=A0A0R0LBR5_SOYBN	0	99.8	AT5G65380.1 | Symbols: | MATE efflux family protein | chr5:26123241-26126352 REVERSE LENGTH=486	0	96.54	GO:0055085	transmembrane transport;	GO:0015297 GO:0022857 GO:0042910	antiporter activity; transmembrane transporter activity; xenobiotic transmembrane transporter activity;	GO:0016020 GO:0016021	membrane; integral component of membrane	PF01554	MatE;	AT5G65380|MNA5.11|MNA5_11
Glyma.01g025600	462	UniRef100_I1J534 Uncharacterized protein n=1 Tax=Glycine max TaxID=3847 RepID=I1J534_SOYBN	0	99.78	UniRef100_A0A0B2PYY6 Protein lap1 n=1 Tax=Glycine soja TaxID=3848 RepID=A0A0B2PYY6_GLYSO	0	99.78	AT1G12970.1 | Symbols: PIRL3 | plant intracellular ras group-related LRR 3 | chr1:4423727-4425632 FORWARD LENGTH=464	2e-164	97.84	GO:0046777 GO:0055046	protein autophosphorylation; microgametogenesis;	GO:0004674	protein serine/threonine kinase activity;	NA	NA	PF13855	LRR_8;	AT1G12970|PIRL3|plant intracellular ras group-related LRR 3|F13K23.23|F13K23_23
Glyma.01g025800	232	UniRef100_I1J535 PB1 domain-containing protein n=1 Tax=Glycine max TaxID=3847 RepID=I1J535_SOYBN	3e-166	99.57	UniRef100_I1J535 PB1 domain-containing protein n=1 Tax=Glycine max TaxID=3847 RepID=I1J535_SOYBN	3e-166	99.57	AT3G48240.1 | Symbols: | Octicosapeptide/Phox/Bem1p family protein | chr3:17867381-17868007 FORWARD LENGTH=180	1e-43	54.31	GO:0008150	biological process;	GO:0003674	molecular function;	GO:0005634	nucleus	PF00564	PB1;	AT3G48240|T29H11.240
Glyma.01g026200	519	UniRef100_K7K1F1 Protein DETOXIFICATION n=1 Tax=Glycine max TaxID=3847 RepID=K7K1F1_SOYBN	0	99.81	UniRef100_K7K1F1 Protein DETOXIFICATION n=1 Tax=Glycine max TaxID=3847 RepID=K7K1F1_SOYBN	0	99.81	AT3G26590.1 | Symbols: | MATE efflux family protein | chr3:9761927-9765259 REVERSE LENGTH=500	0	95.38	GO:0055085	transmembrane transport;	GO:0015297 GO:0022857 GO:0042910	antiporter activity; transmembrane transporter activity; xenobiotic transmembrane transporter activity;	GO:0005773 GO:0005774 GO:0005886 GO:0016020 GO:0016021	vacuole; vacuolar membrane; plasma membrane; membrane; integral component of membrane	PF01554	MatE;	AT3G26590|MFE16.12
Glyma.01g027900	462	UniRef100_I1J563 Uncharacterized protein n=1 Tax=Glycine max TaxID=3847 RepID=I1J563_SOYBN	0	99.78	UniRef100_A0A0B2Q3Z1 Polygalacturonase n=1 Tax=Glycine soja TaxID=3848 RepID=A0A0B2Q3Z1_GLYSO	0	99.78	AT3G26610.1 | Symbols: | Pectin lyase-like superfamily protein | chr3:9777025-9780267 FORWARD LENGTH=470	0	99.57	GO:0009826 GO:0045490 GO:0052546 GO:0060773	unidimensional cell growth; pectin catabolic process; cell wall pectin metabolic process; flower phyllotactic patterning;	GO:0004650 GO:0016829	polygalacturonase activity; lyase activity;	GO:0005576 GO:0048046	extracellular region; apoplast	PF00295	Glyco_hydro_28;	AT3G26610|PGX1|POLYGALACTURONASE INVOLVED IN EXPANSION 1|MFE16.14
Glyma.01g028800	372	UniRef100_I1J572 F-box domain-containing protein n=1 Tax=Glycine max TaxID=3847 RepID=I1J572_SOYBN	0	99.73	UniRef100_I1J572 F-box domain-containing protein n=1 Tax=Glycine max TaxID=3847 RepID=I1J572_SOYBN	0	99.73	AT1G23390.1 | Symbols: | Kelch repeat-containing F-box family protein | chr1:8309449-8310633 REVERSE LENGTH=394	2e-85	94.89	GO:0043161	proteasome-mediated ubiquitin-dependent protein catabolic process;	GO:0005515	protein binding;	GO:0005634 GO:0005737 GO:0005829	nucleus; cytoplasm; cytosol	PF00646	F-box;	AT1G23390|KFB|Kelch domain-containing F-box protein|F26F24.26|F26F24_26
Glyma.01g029600	327	UniRef100_I1J582 Eukaryotic translation initiation factor 3 subunit I n=3 Tax=Soja TaxID=1462606 RepID=I1J582_SOYBN	0	99.69	UniRef100_I1J582 Eukaryotic translation initiation factor 3 subunit I n=3 Tax=Soja TaxID=1462606 RepID=I1J582_SOYBN	0	99.69	AT2G46290.1 | Symbols: | Transducin/WD40 repeat-like superfamily protein | chr2:19005910-19007797 REVERSE LENGTH=355	0	99.69	NA	NA	NA	NA	GO:0005634 GO:0009506 GO:0080008	nucleus; plasmodesma; Cul4-RING E3 ubiquitin ligase complex	PF00400	WD40;	AT2G46290
Glyma.01g031800	789	UniRef100_I1J5A7 Potassium transporter n=3 Tax=Soja TaxID=1462606 RepID=I1J5A7_SOYBN	0	99.87	UniRef100_I1J5A7 Potassium transporter n=3 Tax=Soja TaxID=1462606 RepID=I1J5A7_SOYBN	0	99.87	AT1G70300.1 | Symbols: KUP6 | K+ uptake permease 6 | chr1:26477993-26481233 REVERSE LENGTH=782	0	98.86	GO:0006813 GO:0071805	potassium ion transport; potassium ion transmembrane transport;	GO:0015079	potassium ion transmembrane transporter activity;	GO:0005739 GO:0005886 GO:0016020 GO:0016021	mitochondrion; plasma membrane; membrane; integral component of membrane	PF02705	K_trans;	AT1G70300|KUP6|K+ uptake permease 6|F17O7.17|F17O7_17
Glyma.01g032500	718	UniRef100_I1J5B4 AA_TRNA_LIGASE_II domain-containing protein n=2 Tax=Soja TaxID=1462606 RepID=I1J5B4_SOYBN	0	99.86	UniRef100_I1J5B4 AA_TRNA_LIGASE_II domain-containing protein n=2 Tax=Soja TaxID=1462606 RepID=I1J5B4_SOYBN	0	99.86	AT5G26830.1 | Symbols: | Threonyl-tRNA synthetase | chr5:9437351-9441568 FORWARD LENGTH=709	0	93.45	GO:0006418 GO:0006435	tRNA aminoacylation for protein translation; threonyl-tRNA aminoacylation;	GO:0004812 GO:0004829 GO:0005524 GO:0046872	aminoacyl-tRNA ligase activity; threonine-tRNA ligase activity; ATP binding; metal ion binding;	GO:0005618 GO:0005739 GO:0005829 GO:0005886 GO:0009507 GO:0009536	cell wall; mitochondrion; cytosol; plasma membrane; chloroplast; plastid	PF07973 PF02824 PF03129 PF00587 PF07973 PF03129 PF02824 PF00587	tRNA_SAD; TGS; HGTP_anticodon; tRNA-synt_2b; tRNA_SAD; HGTP_anticodon; TGS; tRNA-synt_2b;	AT5G26830|F2P16.7|F2P16_7
Glyma.01g033700	353	UniRef100_A0A0B2PQC2 WAT1-related protein n=2 Tax=Soja TaxID=1462606 RepID=A0A0B2PQC2_GLYSO	0	99.72	UniRef100_UPI000D629107 uncharacterized protein LOC102615432 n=1 Tax=Citrus sinensis TaxID=2711 RepID=UPI000D629107	1e-103	99.15	AT5G40210.1 | Symbols: | nodulin MtN21 /EamA-like transporter family protein | chr5:16073725-16076088 REVERSE LENGTH=339	4e-76	97.73	NA	NA	GO:0022857	transmembrane transporter activity;	GO:0005886 GO:0016021	plasma membrane; integral component of membrane	PF00892	EamA;	AT5G40210
Glyma.01g034200	292	UniRef100_A0A445LYA8 N-acetyltransferase domain-containing protein n=2 Tax=Soja TaxID=1462606 RepID=A0A445LYA8_GLYSO	0	99.66	UniRef100_A0A445LYA8 N-acetyltransferase domain-containing protein n=2 Tax=Soja TaxID=1462606 RepID=A0A445LYA8_GLYSO	0	99.66	AT1G24040.1 | Symbols: | Acyl-CoA N-acyltransferases (NAT) superfamily protein | chr1:8505794-8506753 REVERSE LENGTH=319	8e-108	98.29	NA	NA	GO:0005515 GO:0008080	protein binding; N-acetyltransferase activity;	GO:0009507	chloroplast	PF00583	Acetyltransf_1;	AT1G24040
Glyma.01g034300	441	UniRef100_A0A0B2PQB8 Protein ALTERED XYLOGLUCAN 4 n=2 Tax=Soja TaxID=1462606 RepID=A0A0B2PQB8_GLYSO	0	99.77	UniRef100_A0A0B2PQB8 Protein ALTERED XYLOGLUCAN 4 n=2 Tax=Soja TaxID=1462606 RepID=A0A0B2PQB8_GLYSO	0	99.77	AT1G70230.1 | Symbols: TBL27 | TRICHOME BIREFRINGENCE-LIKE 27 | chr1:26450389-26451724 FORWARD LENGTH=416	1e-179	96.37	GO:0010411	xyloglucan metabolic process;	GO:0016413	O-acetyltransferase activity;	GO:0000139 GO:0005634 GO:0005794 GO:0016021	Golgi membrane; nucleus; Golgi apparatus; integral component of membrane	PF14416 PF13839	PMR5N; PC-Esterase;	AT1G70230|TBL27|AXY4|TRICHOME BIREFRINGENCE-LIKE 27|ALTERED XYLOGLUCAN 4|F20P5.5|F20P5_5
Glyma.01g034402	149	UniRef100_A0A0R0L5Y3 PMR5N domain-containing protein (Fragment) n=1 Tax=Glycine max TaxID=3847 RepID=A0A0R0L5Y3_SOYBN	4e-90	98.66	UniRef100_A0A0R0L5Y3 PMR5N domain-containing protein (Fragment) n=1 Tax=Glycine max TaxID=3847 RepID=A0A0R0L5Y3_SOYBN	4e-90	98.66	AT1G70230.1 | Symbols: TBL27 | TRICHOME BIREFRINGENCE-LIKE 27 | chr1:26450389-26451724 FORWARD LENGTH=416	3e-41	68.46	GO:0010411	xyloglucan metabolic process;	GO:0016413	O-acetyltransferase activity;	GO:0000139 GO:0005634 GO:0005794 GO:0016021	Golgi membrane; nucleus; Golgi apparatus; integral component of membrane	PF13839 PF14416	PC-Esterase; PMR5N;	AT1G70230|TBL27|AXY4|TRICHOME BIREFRINGENCE-LIKE 27|ALTERED XYLOGLUCAN 4|F20P5.5|F20P5_5
Glyma.01g034600	439	UniRef100_A0A0B2PQM7 Protein ALTERED XYLOGLUCAN 4 n=2 Tax=Soja TaxID=1462606 RepID=A0A0B2PQM7_GLYSO	0	99.77	UniRef100_A0A0B2PQM7 Protein ALTERED XYLOGLUCAN 4 n=2 Tax=Soja TaxID=1462606 RepID=A0A0B2PQM7_GLYSO	0	99.77	AT1G70230.1 | Symbols: TBL27 | TRICHOME BIREFRINGENCE-LIKE 27 | chr1:26450389-26451724 FORWARD LENGTH=416	1e-158	96.81	GO:0010411	xyloglucan metabolic process;	GO:0016413	O-acetyltransferase activity;	GO:0000139 GO:0005634 GO:0005794 GO:0016021	Golgi membrane; nucleus; Golgi apparatus; integral component of membrane	PF14416 PF13839	PMR5N; PC-Esterase;	AT1G70230|TBL27|AXY4|TRICHOME BIREFRINGENCE-LIKE 27|ALTERED XYLOGLUCAN 4|F20P5.5|F20P5_5
Glyma.01g034800	271	UniRef100_A0A0R0LB73 PMR5N domain-containing protein n=1 Tax=Glycine max TaxID=3847 RepID=A0A0R0LB73_SOYBN	0	99.63	UniRef100_A0A0R0LB73 PMR5N domain-containing protein n=1 Tax=Glycine max TaxID=3847 RepID=A0A0R0LB73_SOYBN	0	99.63	AT1G70230.1 | Symbols: TBL27 | TRICHOME BIREFRINGENCE-LIKE 27 | chr1:26450389-26451724 FORWARD LENGTH=416	5e-75	96.68	GO:0010411	xyloglucan metabolic process;	GO:0016413	O-acetyltransferase activity;	GO:0000139 GO:0005634 GO:0005794 GO:0016021	Golgi membrane; nucleus; Golgi apparatus; integral component of membrane	PF13839	PC-Esterase;	AT1G70230|TBL27|AXY4|TRICHOME BIREFRINGENCE-LIKE 27|ALTERED XYLOGLUCAN 4|F20P5.5|F20P5_5
Glyma.01g035000	570	UniRef100_A0A0R0LEW4 Uncharacterized protein n=4 Tax=Soja TaxID=1462606 RepID=A0A0R0LEW4_SOYBN	0	99.82	UniRef100_A0A0B2RA87 Nucleobase-ascorbate transporter 7 n=2 Tax=Soja TaxID=1462606 RepID=A0A0B2RA87_GLYSO	0	93.16	AT1G60030.1 | Symbols: ATNAT7, NAT7 | nucleobase-ascorbate transporter 7 | chr1:22113993-22116648 REVERSE LENGTH=538	0	92.46	GO:0055085	transmembrane transport;	GO:0005215 GO:0022857	transporter activity; transmembrane transporter activity;	GO:0005886 GO:0009506 GO:0016021	plasma membrane; plasmodesma; integral component of membrane	PF00860	Xan_ur_permease;	AT1G60030|ATNAT7|NAT7|ARABIDOPSIS NUCLEOBASE-ASCORBATE TRANSPORTER 7|nucleobase-ascorbate transporter 7|T2K10.8|T2K10_8
Glyma.01g035202	88	UniRef100_A0A0B2SEZ0 Uncharacterized protein n=1 Tax=Glycine soja TaxID=3848 RepID=A0A0B2SEZ0_GLYSO	6e-59	98.86	UniRef100_A0A371F3E1 Methylsterol monooxygenase 2-2 (Fragment) n=1 Tax=Mucuna pruriens TaxID=157652 RepID=A0A371F3E1_MUCPR	7e-13	38.64	NA	NA	NA	NA	NA	NA	NA	NA	NA	NA	NA	NA
Glyma.01g035400	871	UniRef100_K7K1K9 Uncharacterized protein n=3 Tax=Soja TaxID=1462606 RepID=K7K1K9_SOYBN	0	99.89	UniRef100_A0A0B2SKC5 Disease resistance protein RGA2 n=1 Tax=Glycine soja TaxID=3848 RepID=A0A0B2SKC5_GLYSO	0	95.29	AT3G14470.1 | Symbols: | NB-ARC domain-containing disease resistance protein | chr3:4857940-4861104 FORWARD LENGTH=1054	2e-116	89.67	GO:0006952	defense response;	GO:0005515 GO:0005524 GO:0043531	protein binding; ATP binding; ADP binding;	GO:0005576	extracellular region	PF00931	NB-ARC;	AT3G14470|MOA2.9
Glyma.01g035600	383	UniRef100_I1J5E0 Cyclin N-terminal domain-containing protein n=2 Tax=Soja TaxID=1462606 RepID=I1J5E0_SOYBN	0	99.74	UniRef100_I1J5E0 Cyclin N-terminal domain-containing protein n=2 Tax=Soja TaxID=1462606 RepID=I1J5E0_SOYBN	0	99.74	AT1G70210.1 | Symbols: CYCD1;1, ATCYCD1;1 | CYCLIN D1;1 | chr1:26440015-26441980 FORWARD LENGTH=339	1e-132	89.82	GO:0000079 GO:0044772 GO:0051301	regulation of cyclin-dependent protein serine/threonine kinase activity; mitotic cell cycle phase transition; cell division;	GO:0004672 GO:0005515 GO:0016538 GO:0019901	protein kinase activity; protein binding; cyclin-dependent protein serine/threonine kinase regulator activity; protein kinase binding;	GO:0000307 GO:0005634 GO:0005737	cyclin-dependent protein kinase holoenzyme complex; nucleus; cytoplasm	PF02984 PF00134	Cyclin_C; Cyclin_N;	AT1G70210|CYCD1;1|ATCYCD1;1|CYCLIN D1;1|F20P5.7|F20P5_7
Glyma.01g036550	124	NA	NA	NA	NA	NA	NA	NA	NA	NA	NA	NA	NA	NA	NA	NA	NA	NA	NA
Glyma.01g036700	337	UniRef100_I1J5E8 SAM domain-containing protein n=2 Tax=Soja TaxID=1462606 RepID=I1J5E8_SOYBN	0	99.7	UniRef100_I1J5E8 SAM domain-containing protein n=2 Tax=Soja TaxID=1462606 RepID=I1J5E8_SOYBN	0	99.7	AT1G70180.2 | Symbols: | Sterile alpha motif (SAM) domain-containing protein | chr1:26426768-26429097 FORWARD LENGTH=460	3e-23	54.01	NA	NA	GO:0004620	phospholipase activity;	GO:0005634 GO:0005737 GO:0009507	nucleus; cytoplasm; chloroplast	PF00536	SAM_1;	AT1G70180
Glyma.01g036800	434	UniRef100_I1J5E9 WD_REPEATS_REGION domain-containing protein n=2 Tax=Soja TaxID=1462606 RepID=I1J5E9_SOYBN	0	99.77	UniRef100_I1J5E9 WD_REPEATS_REGION domain-containing protein n=2 Tax=Soja TaxID=1462606 RepID=I1J5E9_SOYBN	0	99.77	AT1G24130.1 | Symbols: | Transducin/WD40 repeat-like superfamily protein | chr1:8534183-8535430 REVERSE LENGTH=415	4e-138	90.32	GO:0008150	biological process;	NA	NA	GO:0005634	nucleus	PF00400	WD40;	AT1G24130|F3I6.5|F3I6_5
Glyma.01g037100	341	UniRef100_I1J5F1 ZnMc domain-containing protein n=2 Tax=Soja TaxID=1462606 RepID=I1J5F1_SOYBN	0	99.71	UniRef100_I1J5F1 ZnMc domain-containing protein n=2 Tax=Soja TaxID=1462606 RepID=I1J5F1_SOYBN	0	99.71	AT1G59970.1 | Symbols: | Matrixin family protein | chr1:22073601-22074683 FORWARD LENGTH=360	2e-43	79.18	GO:0006508 GO:0030198 GO:0030574	proteolysis; extracellular matrix organization; collagen catabolic process;	GO:0004222 GO:0008270	metalloendopeptidase activity; zinc ion binding;	GO:0005576 GO:0005886 GO:0031012 GO:0031225	extracellular region; plasma membrane; extracellular matrix; anchored component of membrane	PF01471 PF00413	PG_binding_1; Peptidase_M10;	AT1G59970|AT5-MMP|F23H11.28
Glyma.01g037200	380	UniRef100_I1J5F2 ZnMc domain-containing protein n=2 Tax=Soja TaxID=1462606 RepID=I1J5F2_SOYBN	0	99.74	UniRef100_I1J5F2 ZnMc domain-containing protein n=2 Tax=Soja TaxID=1462606 RepID=I1J5F2_SOYBN	0	99.74	AT1G24140.1 | Symbols: | Matrixin family protein | chr1:8536131-8537285 REVERSE LENGTH=384	2e-130	96.58	GO:0006508 GO:0030198 GO:0030574	proteolysis; extracellular matrix organization; collagen catabolic process;	GO:0004222 GO:0008270	metalloendopeptidase activity; zinc ion binding;	GO:0005576 GO:0005886 GO:0031012 GO:0031225	extracellular region; plasma membrane; extracellular matrix; anchored component of membrane	PF01471 PF00413	PG_binding_1; Peptidase_M10;	AT1G24140|AT3-MMP|F3I6.6|F3I6_6
Glyma.01g038100	1163	UniRef100_K7K1N0 Uncharacterized protein n=4 Tax=Soja TaxID=1462606 RepID=K7K1N0_SOYBN	0	99.91	UniRef100_UPI00098D9191 DExH-box ATP-dependent RNA helicase DExH15 chloroplastic n=1 Tax=Cajanus cajan TaxID=3821 RepID=UPI00098D9191	0	99.14	AT1G70070.1 | Symbols: EMB25, PDE317, ISE2 | DEAD/DEAH box helicase, putative | chr1:26390016-26394148 REVERSE LENGTH=1171	0	90.28	GO:0000373 GO:0006397 GO:0009793 GO:0010497 GO:0016441 GO:0016554 GO:0031047 GO:1901259	Group II intron splicing; mRNA processing; embryo development ending in seed dormancy; plasmodesmata-mediated intercellular transport; posttranscriptional gene silencing; cytidine to uridine editing; gene silencing by RNA; chloroplast rRNA processing;	GO:0003723 GO:0003724 GO:0005524	RNA binding; RNA helicase activity; ATP binding;	GO:0005634 GO:0009507 GO:0009570 GO:0010494	nucleus; chloroplast; chloroplast stroma; cytoplasmic stress granule	PF00271 PF00270 PF08148	Helicase_C; DEAD; DSHCT;	AT1G70070|EMB25|PDE317|ISE2|115J-4A|EMBRYO DEFECTIVE 25|PIGMENT DEFECTIVE 317|INCREASED SIZE EXCLUSION LIMIT 2||F20P5.20|F20P5_20
Glyma.01g038400	668	UniRef100_I1J5G7 Uncharacterized protein n=1 Tax=Glycine max TaxID=3847 RepID=I1J5G7_SOYBN	0	99.85	UniRef100_A0A445LYJ6 TORTIFOLIA1-like protein 4 isoform A n=1 Tax=Glycine soja TaxID=3848 RepID=A0A445LYJ6_GLYSO	0	99.85	AT1G27210.1 | Symbols: | ARM repeat superfamily protein | chr1:9455669-9457917 REVERSE LENGTH=625	4e-177	82.49	NA	NA	GO:0008017	microtubule binding;	GO:0005874 GO:0009507	microtubule; chloroplast	PF02985	HEAT;	AT1G27210
Glyma.01g038500	606	UniRef100_K7K1N3 Glycosyltransferase family 92 protein n=1 Tax=Glycine max TaxID=3847 RepID=K7K1N3_SOYBN	0	99.83	UniRef100_K7K1N3 Glycosyltransferase family 92 protein n=1 Tax=Glycine max TaxID=3847 RepID=K7K1N3_SOYBN	0	99.83	AT1G27200.1 | Symbols: | Domain of unknown function (DUF23) | chr1:9449812-9451539 REVERSE LENGTH=575	0	91.09	GO:0008150	biological process;	NA	NA	GO:0000138 GO:0005634 GO:0005794	Golgi trans cisterna; nucleus; Golgi apparatus	PF13704	Glyco_tranf_2_4;	AT1G27200|T7N9.26|T7N9_26
Glyma.01g039100	196	UniRef100_I1J5H5 Uncharacterized protein n=1 Tax=Glycine max TaxID=3847 RepID=I1J5H5_SOYBN	1e-141	99.49	UniRef100_A0A445LYG7 Protein SHORT HYPOCOTYL IN WHITE LIGHT 1 isoform A n=1 Tax=Glycine soja TaxID=3848 RepID=A0A445LYG7_GLYSO	2e-140	99.49	AT1G69935.1 | Symbols: SHW1 | short hypocotyl in white light1 | chr1:26342072-26343082 REVERSE LENGTH=192	4e-41	45.92	GO:0010100	negative regulation of photomorphogenesis;	NA	NA	GO:0005634 GO:0005739 GO:0009507	nucleus; mitochondrion; chloroplast	NA	NA	AT1G69935|SHW1|SHORT HYPOCOTYL IN WHITE LIGHT1
Glyma.01g039700	751	UniRef100_K7K1P3 Exo84_C domain-containing protein n=1 Tax=Glycine max TaxID=3847 RepID=K7K1P3_SOYBN	0	99.87	UniRef100_K7K1P3 Exo84_C domain-containing protein n=1 Tax=Glycine max TaxID=3847 RepID=K7K1P3_SOYBN	0	99.87	AT1G10385.1 | Symbols: | Vps51/Vps67 family (components of vesicular transport) protein | chr1:3403224-3405856 FORWARD LENGTH=754	0	98.4	GO:0006893 GO:0008104	Golgi to plasma membrane transport; protein localization;	GO:0003674	molecular function;	GO:0000145	exocyst	PF08700 PF16528	Vps51; Exo84_C;	AT1G10385
Glyma.01g042900	537	UniRef100_K7K1Q9 Uncharacterized protein n=2 Tax=Soja TaxID=1462606 RepID=K7K1Q9_SOYBN	0	99.81	UniRef100_V7CKE9 TFIIB-type domain-containing protein n=1 Tax=Phaseolus vulgaris TaxID=3885 RepID=V7CKE9_PHAVU	0	99.26	AT4G35540.1 | Symbols: | zinc ion binding;transcription regulators | chr4:16873939-16875522 FORWARD LENGTH=527	1e-146	98.7	GO:0006352 GO:0006355 GO:0009793 GO:0009846 GO:0070898	DNA-templated transcription, initiation; regulation of transcription, DNA-templated; embryo development ending in seed dormancy; pollen germination; RNA polymerase III preinitiation complex assembly;	GO:0001006 GO:0001093 GO:0003690 GO:0005515 GO:0008134 GO:0042803 GO:0046872 GO:0070063	RNA polymerase III type 3 promoter sequence-specific DNA binding; TFIIB-class transcription factor binding; double-stranded DNA binding; protein binding; transcription factor binding; protein homodimerization activity; metal ion binding; RNA polymerase binding;	GO:0000126 GO:0005634	transcription factor TFIIIB complex; nucleus	NA	NA	AT4G35540|PTF2|Pollen-expressed Transcription Factor 2|F8D20.50|F8D20_50
Glyma.01g043800	564	UniRef100_I1J5M2 DUF4005 domain-containing protein n=2 Tax=Soja TaxID=1462606 RepID=I1J5M2_SOYBN	0	99.82	UniRef100_I1J5M2 DUF4005 domain-containing protein n=2 Tax=Soja TaxID=1462606 RepID=I1J5M2_SOYBN	0	99.82	AT2G02790.1 | Symbols: IQD29 | IQ-domain 29 | chr2:788708-790946 FORWARD LENGTH=636	5e-70	99.11	GO:0008150	biological process;	NA	NA	GO:0005829 GO:0005875 GO:0005886	cytosol; microtubule associated complex; plasma membrane	PF00612 PF13178	IQ; DUF4005;	AT2G02790|IQD29|IQ-domain 29|T20F6.7|T20F6_7
Glyma.01g046300	494	UniRef100_I1J5P9 Glycosyltransferase n=1 Tax=Glycine max TaxID=3847 RepID=I1J5P9_SOYBN	0	99.8	UniRef100_I1J5P9 Glycosyltransferase n=1 Tax=Glycine max TaxID=3847 RepID=I1J5P9_SOYBN	0	99.8	AT2G15480.1 | Symbols: UGT73B5 | UDP-glucosyl transferase 73B5 | chr2:6758817-6760452 FORWARD LENGTH=484	1e-118	95.14	GO:0006952 GO:0051707	defense response; response to other organism;	GO:0008194 GO:0016757 GO:0035251 GO:0047893 GO:0080043 GO:0102360 GO:0102425	UDP-glycosyltransferase activity; transferase activity, transferring glycosyl groups; UDP-glucosyltransferase activity; flavonol 3-O-glucosyltransferase activity; quercetin 3-O-glucosyltransferase activity; daphnetin 3-O-glucosyltransferase activity; myricetin 3-O-glucosyltransferase activity;	GO:0009507 GO:0043231	chloroplast; intracellular membrane-bounded organelle	PF00201	UDPGT;	AT2G15480|UGT73B5|UDP-glucosyl transferase 73B5|F9O13.3
Glyma.01g052900	288	UniRef100_A0A368UIL5 Uncharacterized protein n=2 Tax=Soja TaxID=1462606 RepID=A0A368UIL5_SOYBN	0	99.65	UniRef100_A0A445LMF0 CSC1-like protein isoform H n=1 Tax=Glycine soja TaxID=3848 RepID=A0A445LMF0_GLYSO	0	99.65	AT1G69450.1 | Symbols: | Early-responsive to dehydration stress protein (ERD4) | chr1:26107120-26110006 REVERSE LENGTH=711	2e-137	98.96	NA	NA	GO:0005227	calcium activated cation channel activity;	GO:0005886	plasma membrane	PF02714	RSN1_7TM;	AT1G69450
Glyma.01g056800	298	UniRef100_I1J5Y5 WRKY domain-containing protein n=2 Tax=Soja TaxID=1462606 RepID=I1J5Y5_SOYBN	0	99.66	UniRef100_I1J5Y5 WRKY domain-containing protein n=2 Tax=Soja TaxID=1462606 RepID=I1J5Y5_SOYBN	0	99.66	AT1G69310.1 | Symbols: WRKY57, ATWRKY57 | WRKY DNA-binding protein 57 | chr1:26056118-26057909 REVERSE LENGTH=287	1e-75	92.28	GO:0006355 GO:0006970 GO:0009414 GO:0009651	regulation of transcription, DNA-templated; response to osmotic stress; response to water deprivation; response to salt stress;	GO:0003700 GO:0005515 GO:0043565 GO:0044212	DNA-binding transcription factor activity; protein binding; sequence-specific DNA binding; transcription regulatory region DNA binding;	GO:0005634	nucleus	PF03106	WRKY;	AT1G69310|WRKY57|ATWRKY57|WRKY DNA-binding protein 57|F23O10.11|F23O10_11
Glyma.01g061800	647	UniRef100_I1J626 Uncharacterized protein n=1 Tax=Glycine max TaxID=3847 RepID=I1J626_SOYBN	0	99.85	UniRef100_UPI00098DBA37 uncharacterized protein LOC109801546 n=1 Tax=Cajanus cajan TaxID=3821 RepID=UPI00098DBA37	0	99.85	AT5G13210.1 | Symbols: | Uncharacterised conserved protein UCP015417, _x0001_vWA | chr5:4214567-4216588 FORWARD LENGTH=673	0	99.85	NA	NA	NA	NA	GO:0009507	chloroplast	PF11443	DUF2828;	AT5G13210
Glyma.01g063600	1650	UniRef100_A0A0R0LFZ5 Uncharacterized protein n=2 Tax=Soja TaxID=1462606 RepID=A0A0R0LFZ5_SOYBN	0	99.94	UniRef100_A0A445LMT7 Transcriptional elongation regulator MINIYO isoform A n=2 Tax=Soja TaxID=1462606 RepID=A0A445LMT7_GLYSO	0	96.73	AT4G38440.1 | Symbols: | LOCATED IN: chloroplast; EXPRESSED IN: 21 plant structures; EXPRESSED DURING: 12 growth stages; CONTAINS InterPro DOMAIN/s: RNA polymerase II-associated protein 1, C-terminal (InterPro:IPR013929), RNA polymerase II-associated protein 1, N-terminal (InterPro:IPR013930); Has 276 Blast hits to 220 proteins in 102 species: Archae - 0; Bacteria - 2; Metazoa - 151; Fungi - 65; …	0	93.88	GO:0030154	cell differentiation;	GO:0005515	protein binding;	GO:0005634 GO:0005737	nucleus; cytoplasm	PF08620 PF08621	RPAP1_C; RPAP1_N;	AT4G38440|IYO|MINIYO|F22I13.210|F22I13_210
Glyma.01g080500	318	UniRef100_I1J6J6 Uncharacterized protein n=2 Tax=Soja TaxID=1462606 RepID=I1J6J6_SOYBN	0	99.69	UniRef100_A0A1S3VNP6 uncharacterized protein LOC106777022 n=1 Tax=Vigna radiata var. radiata TaxID=3916 RepID=A0A1S3VNP6_VIGRR	6e-145	98.11	AT1G68440.1 | Symbols: | unknown protein; BEST Arabidopsis thaliana protein match is: unknown protein (TAIR:AT1G25400.2); Has 86 Blast hits to 86 proteins in 29 species: Archae - 0; Bacteria - 6; Metazoa - 27; Fungi - 11; Plants - 24; Viruses - 0; Other Eukaryotes - 18 (source: NCBI BLink). | chr1:25658115-25659035 FORWARD LENGTH=306	7e-33	94.34	GO:0008150	biological process;	GO:0003674	molecular function;	GO:0005634 GO:0016021	nucleus; integral component of membrane	NA	NA	AT1G68440|T2E12.1|T2E12_1
Glyma.01g094300	316	UniRef100_A0A0R0L8L3 Uncharacterized protein n=1 Tax=Glycine max TaxID=3847 RepID=A0A0R0L8L3_SOYBN	0	99.68	UniRef100_K7MLZ7 CCHC-type domain-containing protein n=1 Tax=Glycine max TaxID=3847 RepID=K7MLZ7_SOYBN	8e-142	94.3	NA	NA	NA	NA	NA	NA	NA	NA	NA	NA	NA	NA
Glyma.01g097200	486	UniRef100_A0A445M108 Uncharacterized protein n=2 Tax=Soja TaxID=1462606 RepID=A0A445M108_GLYSO	0	99.79	UniRef100_UPI0003DE8CC0 protein SPT2 isoform X2 n=1 Tax=Glycine max TaxID=3847 RepID=UPI0003DE8CC0	0	99.79	AT2G22720.2 | Symbols: | SPT2 chromatin protein | chr2:9657344-9660532 FORWARD LENGTH=672	2e-37	50	GO:0008150	biological process;	GO:0003674	molecular function;	GO:0005737	cytoplasm	PF08243	SPT2;	AT2G22720|T9I22.16|T9I22_16
Glyma.01g106800	145	UniRef100_A0A0B2RPZ0 18.2 kDa class I heat shock protein n=2 Tax=Soja TaxID=1462606 RepID=A0A0B2RPZ0_GLYSO	5e-97	99.31	UniRef100_A0A0B2RPZ0 18.2 kDa class I heat shock protein n=2 Tax=Soja TaxID=1462606 RepID=A0A0B2RPZ0_GLYSO	5e-97	99.31	AT1G53540.1 | Symbols: | HSP20-like chaperones superfamily protein | chr1:19980510-19980983 FORWARD LENGTH=157	4e-66	99.31	GO:0000302 GO:0006457 GO:0009408 GO:0009651 GO:0042542 GO:0051259	response to reactive oxygen species; protein folding; response to heat; response to salt stress; response to hydrogen peroxide; protein complex oligomerization;	GO:0043621 GO:0051082	protein self-association; unfolded protein binding;	GO:0005737	cytoplasm	PF00011	HSP20;	AT1G53540|HSP17.6C|F22G10.20
Glyma.01g107951	129	UniRef100_UPI00098D959F serine/threonine-protein kinase BSK6 n=1 Tax=Cajanus cajan TaxID=3821 RepID=UPI00098D959F	4e-71	99.22	UniRef100_UPI00098D959F serine/threonine-protein kinase BSK6 n=1 Tax=Cajanus cajan TaxID=3821 RepID=UPI00098D959F	4e-71	99.22	AT3G54030.1 | Symbols: | Protein kinase protein with tetratricopeptide repeat domain | chr3:20011162-20013490 FORWARD LENGTH=490	6e-49	99.22	GO:0006468 GO:0009742	protein phosphorylation; brassinosteroid mediated signaling pathway;	GO:0004674 GO:0005515 GO:0005524	protein serine/threonine kinase activity; protein binding; ATP binding;	GO:0005886 GO:0009507	plasma membrane; chloroplast	NA	NA	AT3G54030|BSK6|brassinosteroid-signaling kinase 6|F5K20.330
Glyma.01g112500	577	UniRef100_UPI00023374D3 protein NRT1/ PTR FAMILY 8.1 n=1 Tax=Glycine max TaxID=3847 RepID=UPI00023374D3	0	99.83	UniRef100_UPI00023374D3 protein NRT1/ PTR FAMILY 8.1 n=1 Tax=Glycine max TaxID=3847 RepID=UPI00023374D3	0	99.83	AT3G54140.1 | Symbols: ATPTR1, PTR1 | peptide transporter 1 | chr3:20045885-20048154 REVERSE LENGTH=570	0	97.92	GO:0006807 GO:0015031 GO:0042938 GO:0042939	nitrogen compound metabolic process; protein transport; dipeptide transport; tripeptide transport;	GO:0015333 GO:0035673 GO:0042937 GO:1904680	peptide:proton symporter activity; oligopeptide transmembrane transporter activity; tripeptide transmembrane transporter activity; peptide transmembrane transporter activity;	GO:0005634 GO:0005886 GO:0009506 GO:0016021	nucleus; plasma membrane; plasmodesma; integral component of membrane	PF00854	PTR2;	AT3G54140|ATPTR1|PTR1|NPF8.1|AtNPF8.1|ARABIDOPSIS THALIANA PEPTIDE TRANSPORTER 1|peptide transporter 1|NRT1/ PTR family 8.1|F24B22.100
Glyma.01g115700	518	UniRef100_K7K384 Uncharacterized protein n=1 Tax=Glycine max TaxID=3847 RepID=K7K384_SOYBN	0	99.81	UniRef100_A0A0B2Q041 UPF0481 protein n=1 Tax=Glycine soja TaxID=3848 RepID=A0A0B2Q041_GLYSO	0	99.81	AT3G50170.1 | Symbols: | Plant protein of unknown function (DUF247) | chr3:18601857-18603738 REVERSE LENGTH=541	2e-25	93.82	GO:0008150	biological process;	GO:0003674	molecular function;	GO:0005777 GO:0016021	peroxisome; integral component of membrane	PF03140	DUF247;	AT3G50170|F11C1.10
Glyma.01g121400	1362	UniRef100_UPI0003DEBE8B uncharacterized protein LOC100776979 isoform X1 n=1 Tax=Glycine max TaxID=3847 RepID=UPI0003DEBE8B	0	99.93	UniRef100_UPI0003DEBE8B uncharacterized protein LOC100776979 isoform X1 n=1 Tax=Glycine max TaxID=3847 RepID=UPI0003DEBE8B	0	99.93	AT5G01400.1 | Symbols: ESP4 | HEAT repeat-containing protein | chr5:162803-171072 REVERSE LENGTH=1467	0	96.4	GO:0006396 GO:0035194	RNA processing; posttranscriptional gene silencing by RNA;	NA	NA	GO:0005737 GO:0005847	cytoplasm; mRNA cleavage and polyadenylation specificity factor complex	PF11935 PF12295	DUF3453; Symplekin_C;	AT5G01400|ESP4|ENHANCED SILENCING PHENOTYPE 4|T10O8.110|T10O8_110
Glyma.01g123000	179	UniRef100_K7K3F3 BHLH domain-containing protein n=3 Tax=Soja TaxID=1462606 RepID=K7K3F3_SOYBN	2e-131	99.44	UniRef100_K7K3F3 BHLH domain-containing protein n=3 Tax=Soja TaxID=1462606 RepID=K7K3F3_SOYBN	2e-131	99.44	AT5G01310.1 | Symbols: APTX | APRATAXIN-like | chr5:125304-128960 FORWARD LENGTH=912	5e-33	76.54	GO:0000012 GO:0006260 GO:0006302 GO:0006790 GO:0009150	single strand break repair; DNA replication; double-strand break repair; sulfur compound metabolic process; purine ribonucleotide metabolic process;	GO:0003697 GO:0003725 GO:0005524 GO:0030983 GO:0033699 GO:0046872 GO:0046983 GO:0047627 GO:1990165	single-stranded DNA binding; double-stranded RNA binding; ATP binding; mismatched DNA binding; DNA 5'-adenosine monophosphate hydrolase activity; metal ion binding; protein dimerization activity; adenylylsulfatase activity; single-strand break-containing DNA binding;	GO:0005634	nucleus	PF00010	HLH;	AT5G01310|APTX|APRATAXIN-like|T10O8.20|T10O8_20
Glyma.01g124000	269	UniRef100_K7K3F9 Uncharacterized protein n=1 Tax=Glycine max TaxID=3847 RepID=K7K3F9_SOYBN	0	99.63	UniRef100_A0A1S3V0A9 uncharacterized protein LOC106770490 n=1 Tax=Vigna radiata var. radiata TaxID=3916 RepID=A0A1S3V0A9_VIGRR	5e-147	99.26	AT3G51760.1 | Symbols: | Protein of unknown function (DUF688) | chr3:19198541-19199405 REVERSE LENGTH=259	4e-27	88.48	GO:0008150	biological process;	GO:0003674	molecular function;	GO:0005634 GO:0005739	nucleus; mitochondrion	PF05097	DUF688;	AT3G51760|ATEM1.1
Glyma.01g125100	102	UniRef100_C6T0V9 Uncharacterized protein n=3 Tax=Soja TaxID=1462606 RepID=C6T0V9_SOYBN	1e-67	99.02	UniRef100_A0A4D6NEF0 Small subunit ribosomal protein S17 n=1 Tax=Vigna unguiculata TaxID=3917 RepID=A0A4D6NEF0_VIGUN	5e-56	99.02	AT3G18880.1 | Symbols: | Nucleic acid-binding, OB-fold-like protein | chr3:6509588-6510069 FORWARD LENGTH=105	1e-47	81.37	GO:0006412	translation;	GO:0003735	structural constituent of ribosome;	GO:0022627	cytosolic small ribosomal subunit	PF00366	Ribosomal_S17;	AT3G18880|MCB22.5
Glyma.01g127900	506	UniRef100_A0A445M298 Uncharacterized protein n=1 Tax=Glycine soja TaxID=3848 RepID=A0A445M298_GLYSO	0	99.8	UniRef100_UPI0007191870 uncharacterized protein LOC100811015 n=1 Tax=Glycine max TaxID=3847 RepID=UPI0007191870	0	99.8	AT5G01710.1 | Symbols: | methyltransferases | chr5:263709-265250 REVERSE LENGTH=513	0	99.8	GO:0032259	methylation;	GO:0008168	methyltransferase activity;	GO:0000138	Golgi trans cisterna	PF05050 PF08241	Methyltransf_21; Methyltransf_11;	AT5G01710|F7A7.230|F7A7_230
Glyma.01g135200	527	UniRef100_I1J7R1 Uncharacterized protein n=1 Tax=Glycine max TaxID=3847 RepID=I1J7R1_SOYBN	0	99.81	UniRef100_A0A445M305 Cytochrome P450 82A4 n=1 Tax=Glycine soja TaxID=3848 RepID=A0A445M305_GLYSO	0	99.81	AT4G31940.1 | Symbols: CYP82C4 | cytochrome P450, family 82, subfamily C, polypeptide 4 | chr4:15452040-15453966 FORWARD LENGTH=524	4e-162	91.84	GO:0010039 GO:0055114 GO:0071281 GO:0098542 GO:0106146	response to iron ion; oxidation-reduction process; cellular response to iron ion; defense response to other organism; sideretin biosynthesis;	GO:0004497 GO:0005506 GO:0016709 GO:0020037 GO:0106144	monooxygenase activity; iron ion binding; oxidoreductase activity, acting on paired donors, with incorporation or reduction of molecular oxygen, NAD(P)H as one donor, and incorporation of one atom of oxygen; heme binding; fraxetin 5-hydroxylase activity;	GO:0009507 GO:0016020 GO:0016021	chloroplast; membrane; integral component of membrane	PF00067	p450;	AT4G31940|CYP82C4|cytochrome P450, family 82, subfamily C, polypeptide 4|F11C18.7
Glyma.01g136300	738	UniRef100_I1J7R8 GRAS domain-containing protein n=1 Tax=Glycine max TaxID=3847 RepID=I1J7R8_SOYBN	0	99.86	UniRef100_I1J7R8 GRAS domain-containing protein n=1 Tax=Glycine max TaxID=3847 RepID=I1J7R8_SOYBN	0	99.86	AT4G00150.1 | Symbols: HAM3, ATHAM3, LOM3 | GRAS family transcription factor | chr4:57429-59105 REVERSE LENGTH=558	1e-129	48.78	GO:0006355 GO:0007623 GO:0030154 GO:0048768 GO:0051301	regulation of transcription, DNA-templated; circadian rhythm; cell differentiation; root hair cell tip growth; cell division;	GO:0003700 GO:0005515 GO:0043565	DNA-binding transcription factor activity; protein binding; sequence-specific DNA binding;	GO:0005634	nucleus	PF03514	GRAS;	AT4G00150|SCL6-IV|HAM3|ATHAM3|LOM3|HAIRY MERISTEM 3|ARABIDOPSIS THALIANA HAIRY MERISTEM 3|LOST MERISTEMS 3|F6N15.20|F6N15_20
Glyma.01g139666	130	NA	NA	NA	NA	NA	NA	NA	NA	NA	NA	NA	NA	NA	NA	NA	NA	NA	NA
Glyma.01g142000	157	UniRef100_A0A0R0LAM6 Uncharacterized protein n=1 Tax=Glycine max TaxID=3847 RepID=A0A0R0LAM6_SOYBN	2e-113	99.36	UniRef100_A0A445M2S5 S-protein-like 3 n=1 Tax=Glycine soja TaxID=3848 RepID=A0A445M2S5_GLYSO	2e-76	91.08	AT5G04350.1 | Symbols: | Plant self-incompatibility protein S1 family | chr5:1220829-1221269 FORWARD LENGTH=146	2e-15	72.61	GO:0008150	biological process;	GO:0003674	molecular function;	NA	NA	PF05938	Self-incomp_S1;	AT5G04350|T19N18.80|T19N18_80
Glyma.01g146600	1097	UniRef100_A0A0R0LBA6 Uncharacterized protein n=1 Tax=Glycine max TaxID=3847 RepID=A0A0R0LBA6_SOYBN	0	99.91	UniRef100_A0A0B2PZZ1 Protein phosphatase 2C and cyclic nucleotide-binding/kinase domain-containing protein n=1 Tax=Glycine soja TaxID=3848 RepID=A0A0B2PZZ1_GLYSO	0	97.63	AT2G20050.1 | Symbols: | protein serine/threonine phosphatases;protein kinases;catalytics;cAMP-dependent protein kinase regulators;ATP binding;protein serine/threonine phosphatases | chr2:8649779-8654193 REVERSE LENGTH=1094	0	95.08	GO:0007165 GO:0018105	signal transduction; peptidyl-serine phosphorylation;	GO:0004691 GO:0004721 GO:0005524 GO:0046872	cAMP-dependent protein kinase activity; phosphoprotein phosphatase activity; ATP binding; metal ion binding;	GO:0005739 GO:0005886 GO:0005952 GO:0009507	mitochondrion; plasma membrane; cAMP-dependent protein kinase complex; chloroplast	PF07714 PF00027 PF00481	Pkinase_Tyr; cNMP_binding; PP2C;	AT2G20050|T2G17.15|T2G17_15
Glyma.01g148600	336	UniRef100_K7K3Y3 Uncharacterized protein n=2 Tax=Soja TaxID=1462606 RepID=K7K3Y3_SOYBN	0	99.7	UniRef100_A0A445J438 Growth-regulating factor 3 n=1 Tax=Glycine soja TaxID=3848 RepID=A0A445J438_GLYSO	0	99.7	AT3G13960.1 | Symbols: AtGRF5, GRF5 | growth-regulating factor 5 | chr3:4608526-4610160 FORWARD LENGTH=397	4e-39	29.76	GO:0006351 GO:0006355 GO:0048366	transcription, DNA-templated; regulation of transcription, DNA-templated; leaf development;	GO:0005515 GO:0005524	protein binding; ATP binding;	GO:0005634	nucleus	PF08880 PF08879	QLQ; WRC;	AT3G13960|AtGRF5|GRF5|growth-regulating factor 5|MDC16.8
Glyma.01g149700	307	UniRef100_I1J836 ATP-dependent Clp protease proteolytic subunit n=2 Tax=Soja TaxID=1462606 RepID=I1J836_SOYBN	0	99.67	UniRef100_I1J836 ATP-dependent Clp protease proteolytic subunit n=2 Tax=Soja TaxID=1462606 RepID=I1J836_SOYBN	0	99.67	AT5G45390.1 | Symbols: CLPP4, NCLPP4 | CLP protease P4 | chr5:18396351-18397586 FORWARD LENGTH=292	2e-143	88.93	GO:0006515 GO:0009658 GO:0048510	protein quality control for misfolded or incompletely synthesized proteins; chloroplast organization; regulation of timing of transition from vegetative to reproductive phase;	GO:0004176 GO:0004252 GO:0051117	ATP-dependent peptidase activity; serine-type endopeptidase activity; ATPase binding;	GO:0009368 GO:0009507 GO:0009532 GO:0009535 GO:0009536 GO:0009570 GO:0009579 GO:0009840 GO:0009941	endopeptidase Clp complex; chloroplast; plastid stroma; chloroplast thylakoid membrane; plastid; chloroplast stroma; thylakoid; chloroplastic endopeptidase Clp complex; chloroplast envelope	PF00574	CLP_protease;	AT5G45390|CLPP4|NCLPP4|CLP protease P4|NUCLEAR-ENCODED CLP PROTEASE P4|MFC19.6|MFC19_6
Glyma.01g150800	363	UniRef100_I1J846 SH3 domain-containing protein n=2 Tax=Soja TaxID=1462606 RepID=I1J846_SOYBN	0	99.72	UniRef100_I1J846 SH3 domain-containing protein n=2 Tax=Soja TaxID=1462606 RepID=I1J846_SOYBN	0	99.72	AT1G31440.1 | Symbols: | SH3 domain-containing protein | chr1:11256150-11258479 REVERSE LENGTH=439	5e-139	99.72	NA	NA	GO:0005515 GO:0030276	protein binding; clathrin binding;	GO:0005634 GO:0005783 GO:0005794 GO:0005886 GO:0012505 GO:0030136	nucleus; endoplasmic reticulum; Golgi apparatus; plasma membrane; endomembrane system; clathrin-coated vesicle	PF14604	SH3_9;	AT1G31440
Glyma.01g152000	453	UniRef100_I1J859 Uncharacterized protein n=2 Tax=Soja TaxID=1462606 RepID=I1J859_SOYBN	0	99.78	UniRef100_UPI0010164F11 LOW QUALITY PROTEIN: methanol O-anthraniloyltransferase-like n=1 Tax=Vigna unguiculata TaxID=3917 RepID=UPI0010164F11	0	99.56	AT5G17540.1 | Symbols: | HXXXD-type acyl-transferase family protein | chr5:5782061-5783682 REVERSE LENGTH=461	1e-131	94.7	NA	NA	GO:0016747	transferase activity, transferring acyl groups other than amino-acyl groups;	GO:0005737	cytoplasm	PF02458	Transferase;	AT5G17540
Glyma.01g152600	230	UniRef100_K7K411 LEA_2 domain-containing protein n=2 Tax=Soja TaxID=1462606 RepID=K7K411_SOYBN	7e-169	99.57	UniRef100_K7K411 LEA_2 domain-containing protein n=2 Tax=Soja TaxID=1462606 RepID=K7K411_SOYBN	7e-169	99.57	AT5G45320.1 | Symbols: | FUNCTIONS IN: molecular_function unknown; INVOLVED IN: biological_process unknown; LOCATED IN: endomembrane system; EXPRESSED IN: inflorescence meristem, root, flower; EXPRESSED DURING: petal differentiation and expansion stage; CONTAINS InterPro DOMAIN/s: Late embryogenesis abundant protein, group 2 (InterPro:IPR004864); BEST Arabidopsis thaliana protein match is: unknow…	8e-66	82.17	GO:0008150	biological process;	GO:0003674	molecular function;	GO:0009507 GO:0016021	chloroplast; integral component of membrane	PF03168	LEA_2;	AT5G45320|K9E15.10|K9E15_10
Glyma.01g153300	468	UniRef100_I1J871 Uncharacterized protein n=2 Tax=Glycine max TaxID=3847 RepID=I1J871_SOYBN	0	99.79	UniRef100_A0A445M3G6 Abscisic acid 8'-hydroxylase 1 isoform A n=2 Tax=Glycine soja TaxID=3848 RepID=A0A445M3G6_GLYSO	0	99.79	AT5G45340.1 | Symbols: CYP707A3 | cytochrome P450, family 707, subfamily A, polypeptide 3 | chr5:18368977-18370909 REVERSE LENGTH=463	0	98.72	GO:0009414 GO:0009639 GO:0009687 GO:0016125 GO:0046345 GO:0055114 GO:0071456	response to water deprivation; response to red or far red light; abscisic acid metabolic process; sterol metabolic process; abscisic acid catabolic process; oxidation-reduction process; cellular response to hypoxia;	GO:0004497 GO:0005506 GO:0010295 GO:0016491 GO:0016709 GO:0020037	monooxygenase activity; iron ion binding; (+)-abscisic acid 8'-hydroxylase activity; oxidoreductase activity; oxidoreductase activity, acting on paired donors, with incorporation or reduction of molecular oxygen, NAD(P)H as one donor, and incorporation of one atom of oxygen; heme binding;	GO:0005576 GO:0009507 GO:0016021	extracellular region; chloroplast; integral component of membrane	PF00067	p450;	AT5G45340|CYP707A3|cytochrome P450, family 707, subfamily A, polypeptide 3|K9E15.12|K9E15_12
Glyma.01g153400	186	UniRef100_K7K414 S4 RNA-binding domain-containing protein n=1 Tax=Glycine max TaxID=3847 RepID=K7K414_SOYBN	3e-132	99.46	UniRef100_K7K414 S4 RNA-binding domain-containing protein n=1 Tax=Glycine max TaxID=3847 RepID=K7K414_SOYBN	3e-132	99.46	ATCG00380.1 | Symbols: RPS4 | chloroplast ribosomal protein S4 | chrC:45223-45828 REVERSE LENGTH=201	2e-108	99.46	GO:0006412 GO:0045903	translation; positive regulation of translational fidelity;	GO:0003735 GO:0019843	structural constituent of ribosome; rRNA binding;	GO:0000312 GO:0009507 GO:0009536 GO:0009570 GO:0015935	plastid small ribosomal subunit; chloroplast; plastid; chloroplast stroma; small ribosomal subunit	PF01479 PF00163	S4; Ribosomal_S4;	ATCG00380|RPS4|chloroplast ribosomal protein S4|ribosomal protein s4
Glyma.01g155000	424	UniRef100_A0A0B2R3S8 Pentatricopeptide repeat-containing protein n=2 Tax=Soja TaxID=1462606 RepID=A0A0B2R3S8_GLYSO	0	99.76	UniRef100_A0A0B2R3S8 Pentatricopeptide repeat-containing protein n=2 Tax=Soja TaxID=1462606 RepID=A0A0B2R3S8_GLYSO	0	99.76	AT1G31790.1 | Symbols: | Tetratricopeptide repeat (TPR)-like superfamily protein | chr1:11394744-11395973 REVERSE LENGTH=409	1e-108	78.54	GO:0009451	RNA modification;	NA	NA	GO:0009507 GO:0043231	chloroplast; intracellular membrane-bounded organelle	PF13812 PF01535	PPR_3; PPR;	AT1G31790|F5M6.20|F5M6_20
Glyma.01g155200	594	UniRef100_I1J890 Uncharacterized protein n=3 Tax=Soja TaxID=1462606 RepID=I1J890_SOYBN	0	99.83	UniRef100_UPI00103EDDDE protein root UVB sensitive 1, chloroplastic-like n=1 Tax=Glycine soja TaxID=3848 RepID=UPI00103EDDDE	0	99.83	AT3G45890.1 | Symbols: RUS1 | Protein of unknown function, DUF647 | chr3:16871697-16874100 FORWARD LENGTH=608	0	83.33	GO:0010224 GO:0032502	response to UV-B; developmental process;	NA	NA	GO:0005739 GO:0009536 GO:0009941 GO:0016021 GO:0031969	mitochondrion; plastid; chloroplast envelope; integral component of membrane; chloroplast membrane	PF04884	DUF647;	AT3G45890|RUS1|WXR3|ROOT UVB SENSITIVE 1|WEAK AUXIN RESPONSE 3|F16L2.100|RUS1
Glyma.01g157400	224	UniRef100_I1J8B1 RING-type domain-containing protein n=2 Tax=Soja TaxID=1462606 RepID=I1J8B1_SOYBN	3e-161	99.55	UniRef100_I1J8B1 RING-type domain-containing protein n=2 Tax=Soja TaxID=1462606 RepID=I1J8B1_SOYBN	3e-161	99.55	AT1G76410.1 | Symbols: ATL8 | RING/U-box superfamily protein | chr1:28668915-28669472 FORWARD LENGTH=185	8e-61	79.91	GO:0016567	protein ubiquitination;	GO:0016740 GO:0046872	transferase activity; metal ion binding;	GO:0016021	integral component of membrane	PF13639	zf-RING_2;	AT1G76410|ATL8|F15M4.9
Glyma.01g161900	443	UniRef100_K7K461 ANK_REP_REGION domain-containing protein n=1 Tax=Glycine max TaxID=3847 RepID=K7K461_SOYBN	0	99.77	UniRef100_K7K461 ANK_REP_REGION domain-containing protein n=1 Tax=Glycine max TaxID=3847 RepID=K7K461_SOYBN	0	99.77	AT5G66055.1 | Symbols: EMB16, EMB2036, AKRP | ankyrin repeat protein | chr5:26417425-26419234 REVERSE LENGTH=435	4e-160	94.81	GO:0009793	embryo development ending in seed dormancy;	GO:0005515	protein binding;	GO:0005634 GO:0009507	nucleus; chloroplast	PF12796	Ank_2;	AT5G66055|EMB16|EMB2036|AKRP|123B|AKR|EMBRYO DEFECTIVE 16|EMBRYO DEFECTIVE 2036|ankyrin repeat protein|
Glyma.01g162600	122	UniRef100_I1J8G8 Uncharacterized protein n=2 Tax=Soja TaxID=1462606 RepID=I1J8G8_SOYBN	5e-84	99.18	UniRef100_A0A445HLG2 Transcription factor LUX isoform A n=1 Tax=Glycine soja TaxID=3848 RepID=A0A445HLG2_GLYSO	1e-42	98.36	AT5G59570.1 | Symbols: | Homeodomain-like superfamily protein | chr5:24004047-24004943 FORWARD LENGTH=298	2e-23	98.36	GO:0006355 GO:0007623 GO:0009909	regulation of transcription, DNA-templated; circadian rhythm; regulation of flower development;	GO:0003677 GO:0003700	DNA binding; DNA-binding transcription factor activity;	GO:0005634	nucleus	NA	NA	AT5G59570|BOA|BROTHER OF LUX ARRHYTHMO|F2O15.24|F2O15_24
Glyma.01g163300	502	UniRef100_K7K470 HTH La-type RNA-binding domain-containing protein n=2 Tax=Glycine max TaxID=3847 RepID=K7K470_SOYBN	0	99.8	UniRef100_K7K470 HTH La-type RNA-binding domain-containing protein n=2 Tax=Glycine max TaxID=3847 RepID=K7K470_SOYBN	0	99.8	AT4G35890.1 | Symbols: | winged-helix DNA-binding transcription factor family protein | chr4:16997433-17000410 FORWARD LENGTH=523	9e-67	98.8	GO:0009737 GO:0009738 GO:0009751 GO:0009753 GO:0010150	response to abscisic acid; abscisic acid-activated signaling pathway; response to salicylic acid; response to jasmonic acid; leaf senescence;	GO:0003729	mRNA binding;	GO:0005737 GO:0005886 GO:0009507	cytoplasm; plasma membrane; chloroplast	PF05383	La;	AT4G35890|LARP1c|AtLARP1c|La related protein 1c|T19K4.20
Glyma.01g164000	445	UniRef100_I1J8I6 Uncharacterized protein n=1 Tax=Glycine max TaxID=3847 RepID=I1J8I6_SOYBN	0	99.78	UniRef100_A0A445M448 Protein MID1-COMPLEMENTING ACTIVITY 1 isoform A n=1 Tax=Glycine soja TaxID=3848 RepID=A0A445M448_GLYSO	0	99.78	AT4G35920.1 | Symbols: MCA1 | PLAC8 family protein | chr4:17012106-17014192 REVERSE LENGTH=421	0	99.1	GO:0006816 GO:0007231 GO:0033500 GO:0070588 GO:0071260	calcium ion transport; osmosensory signaling pathway; carbohydrate homeostasis; calcium ion transmembrane transport; cellular response to mechanical stimulus;	GO:0005262	calcium channel activity;	GO:0005634 GO:0005887	nucleus; integral component of plasma membrane	PF04749	PLAC8;	AT4G35920|MCA1|mid1-complementing activity 1|T19K4.50
Glyma.01g164500	626	UniRef100_I1J8J5 Uncharacterized protein n=1 Tax=Glycine max TaxID=3847 RepID=I1J8J5_SOYBN	0	99.84	UniRef100_A0A445M4H2 Nitrate regulatory gene2 protein n=1 Tax=Glycine soja TaxID=3848 RepID=A0A445M4H2_GLYSO	0	99.84	AT3G51290.1 | Symbols: | Protein of unknown function (DUF630) ;Protein of unknown function (DUF632) | chr3:19039980-19042437 FORWARD LENGTH=634	0	99.84	NA	NA	NA	NA	GO:0005634	nucleus	PF04783 PF04782	DUF630; DUF632;	AT3G51290
Glyma.01g164700	301	UniRef100_I1J8J7 PEROXIDASE_4 domain-containing protein n=2 Tax=Soja TaxID=1462606 RepID=I1J8J7_SOYBN	0	99.67	UniRef100_I1J8J7 PEROXIDASE_4 domain-containing protein n=2 Tax=Soja TaxID=1462606 RepID=I1J8J7_SOYBN	0	99.67	AT4G35000.1 | Symbols: APX3 | ascorbate peroxidase 3 | chr4:16665007-16667541 REVERSE LENGTH=287	4e-100	84.72	GO:0000302 GO:0006979 GO:0034599 GO:0042744 GO:0055114 GO:0098869	response to reactive oxygen species; response to oxidative stress; cellular response to oxidative stress; hydrogen peroxide catabolic process; oxidation-reduction process; cellular oxidant detoxification;	GO:0004601 GO:0005515 GO:0016688 GO:0020037 GO:0046872	peroxidase activity; protein binding; L-ascorbate peroxidase activity; heme binding; metal ion binding;	GO:0005739 GO:0005773 GO:0005774 GO:0005777 GO:0005778 GO:0005886 GO:0009506 GO:0009507 GO:0009536 GO:0009941 GO:0016021 GO:0046861	mitochondrion; vacuole; vacuolar membrane; peroxisome; peroxisomal membrane; plasma membrane; plasmodesma; chloroplast; plastid; chloroplast envelope; integral component of membrane; glyoxysomal membrane	PF00141	peroxidase;	AT4G35000|APX3|ascorbate peroxidase 3|M4E13.60|M4E13_60|ASCORBATE PEROXIDASE 3
Glyma.01g164800	1248	UniRef100_A0A0R0LKY2 Uncharacterized protein n=1 Tax=Glycine max TaxID=3847 RepID=A0A0R0LKY2_SOYBN	0	99.92	UniRef100_UPI00104093C0 histidine kinase 1-like isoform X1 n=1 Tax=Glycine soja TaxID=3848 RepID=UPI00104093C0	0	99.92	AT2G17820.1 | Symbols: ATHK1, AHK1, HK1 | histidine kinase 1 | chr2:7743133-7748013 REVERSE LENGTH=1207	0	99.04	GO:0000160 GO:0006970 GO:0009414 GO:0009738 GO:0010375 GO:0010431	phosphorelay signal transduction system; response to osmotic stress; response to water deprivation; abscisic acid-activated signaling pathway; stomatal complex patterning; seed maturation;	GO:0000155 GO:0004673 GO:0005034 GO:0005515 GO:0009927	phosphorelay sensor kinase activity; protein histidine kinase activity; osmosensor activity; protein binding; histidine phosphotransfer kinase activity;	GO:0005634 GO:0016021	nucleus; integral component of membrane	PF00512 PF02518 PF00072	HisKA; HATPase_c; Response_reg;	AT2G17820|ATHK1|AHK1|HK1|histidine kinase 1|T13L16.16|T13L16_16
Glyma.01g167200	755	UniRef100_K7K491 Uncharacterized protein n=1 Tax=Glycine max TaxID=3847 RepID=K7K491_SOYBN	0	99.87	UniRef100_A0A445M4L2 Filament-like plant protein 5 isoform A n=2 Tax=Glycine soja TaxID=3848 RepID=A0A445M4L2_GLYSO	0	99.87	AT4G36120.1 | Symbols: | Plant protein of unknown function (DUF869) | chr4:17093213-17096573 REVERSE LENGTH=996	3e-149	64.24	GO:0008150	biological process;	GO:0003674	molecular function;	GO:0005634	nucleus	PF05911	FPP;	AT4G36120|T19K4.250|T19K4_250
Glyma.01g167400	390	UniRef100_A0A0R0LC89 C3H1-type domain-containing protein n=1 Tax=Glycine max TaxID=3847 RepID=A0A0R0LC89_SOYBN	0	99.74	UniRef100_A0A0R0LC89 C3H1-type domain-containing protein n=1 Tax=Glycine max TaxID=3847 RepID=A0A0R0LC89_SOYBN	0	99.74	AT1G19860.1 | Symbols: | Zinc finger C-x8-C-x5-C-x3-H type family protein | chr1:6891654-6894400 REVERSE LENGTH=413	9e-25	99.49	GO:0008150	biological process;	GO:0003677 GO:0005515 GO:0046872	DNA binding; protein binding; metal ion binding;	GO:0005576 GO:0005634	extracellular region; nucleus	NA	NA	AT1G19860|F6F9.9|F6F9_9
Glyma.01g169800	634	UniRef100_K7K4A7 FAD-binding PCMH-type domain-containing protein n=2 Tax=Soja TaxID=1462606 RepID=K7K4A7_SOYBN	0	99.84	UniRef100_K7K4A7 FAD-binding PCMH-type domain-containing protein n=2 Tax=Soja TaxID=1462606 RepID=K7K4A7_SOYBN	0	99.84	AT4G36400.1 | Symbols: | FAD-linked oxidases family protein | chr4:17197265-17200472 FORWARD LENGTH=559	0	87.07	GO:0006807 GO:0009853 GO:0055114	nitrogen compound metabolic process; photorespiration; oxidation-reduction process;	GO:0047545 GO:0051990 GO:0071949	2-hydroxyglutarate dehydrogenase activity; (R)-2-hydroxyglutarate dehydrogenase activity; FAD binding;	GO:0005739 GO:0005886	mitochondrion; plasma membrane	PF01565 PF02913 PF02913 PF01565	FAD_binding_4; FAD-oxidase_C; FAD-oxidase_C; FAD_binding_4;	AT4G36400|D2HGDH|D-2-hydroxyglutarate dehydrogenase|AP22.14|AP22_14
Glyma.01g170700	317	UniRef100_K7K4B8 Uncharacterized protein n=1 Tax=Glycine max TaxID=3847 RepID=K7K4B8_SOYBN	0	99.68	UniRef100_A0A445M459 Protein SHORT INTERNODES n=1 Tax=Glycine soja TaxID=3848 RepID=A0A445M459_GLYSO	0	99.68	AT5G66350.1 | Symbols: SHI | Lateral root primordium (LRP) protein-related | chr5:26504714-26506143 REVERSE LENGTH=331	9e-75	99.68	GO:0009555 GO:0009734 GO:0009739 GO:0009740 GO:0009851 GO:0009938 GO:0045893 GO:0048653	pollen development; auxin-activated signaling pathway; response to gibberellin; gibberellic acid mediated signaling pathway; auxin biosynthetic process; negative regulation of gibberellic acid mediated signaling pathway; positive regulation of transcription, DNA-templated; anther development;	GO:0003677 GO:0003700 GO:0005515 GO:0046872 GO:0046982	DNA binding; DNA-binding transcription factor activity; protein binding; metal ion binding; protein heterodimerization activity;	GO:0005634	nucleus	PF05142	DUF702;	AT5G66350|SHI|SHORT INTERNODES|K1L20.13|K1L20_13
Glyma.01g171300	466	UniRef100_I1J8R6 AAA domain-containing protein n=1 Tax=Glycine max TaxID=3847 RepID=I1J8R6_SOYBN	0	99.79	UniRef100_I1J8R6 AAA domain-containing protein n=1 Tax=Glycine max TaxID=3847 RepID=I1J8R6_SOYBN	0	99.79	AT2G18193.1 | Symbols: | P-loop containing nucleoside triphosphate hydrolases superfamily protein | chr2:7917621-7919184 REVERSE LENGTH=495	5e-144	91.85	NA	NA	GO:0005524 GO:0016887	ATP binding; ATPase activity;	GO:0005783 GO:0016021	endoplasmic reticulum; integral component of membrane	PF14363 PF00004	AAA_assoc; AAA;	AT2G18193
Glyma.01g175300	763	UniRef100_I1J8V7 Uncharacterized protein n=1 Tax=Glycine max TaxID=3847 RepID=I1J8V7_SOYBN	0	99.87	UniRef100_A0A445M4F3 ATP-dependent DNA helicase DDM1 isoform A n=1 Tax=Glycine soja TaxID=3848 RepID=A0A445M4F3_GLYSO	0	99.87	AT5G66750.1 | Symbols: DDM1, CHR01, CHR1, CHA1, SOM4, SOM1, ATDDM1 | chromatin remodeling 1 | chr5:26649050-26652869 FORWARD LENGTH=764	0	99.34	GO:0006344 GO:0006346 GO:0006349 GO:0009294 GO:0032197 GO:0044030 GO:0051574 GO:0090241	maintenance of chromatin silencing; methylation-dependent chromatin silencing; regulation of gene expression by genetic imprinting; DNA mediated transformation; transposition, RNA-mediated; regulation of DNA methylation; positive regulation of histone H3-K9 methylation; negative regulation of histone H4 acetylation;	GO:0003677 GO:0003678 GO:0005515 GO:0005524 GO:0008094 GO:0016887	DNA binding; DNA helicase activity; protein binding; ATP binding; DNA-dependent ATPase activity; ATPase activity;	GO:0000786 GO:0005634	nucleosome; nucleus	PF04851 PF00271	ResIII; Helicase_C;	AT5G66750|DDM1|CHR01|CHR1|CHA1|SOM4|SOM1|ATDDM1|DECREASED DNA METHYLATION 1|CHROMATIN REMODELING 1|SOMNIFEROUS 1|MSN2.14|MSN2_14
Glyma.01g179400	507	UniRef100_A0A0R0LCL4 Uncharacterized protein n=2 Tax=Glycine max TaxID=3847 RepID=A0A0R0LCL4_SOYBN	0	99.8	UniRef100_A0A445M4R0 Cytochrome P450 71D8 n=1 Tax=Glycine soja TaxID=3848 RepID=A0A445M4R0_GLYSO	0	99.8	AT3G26300.1 | Symbols: CYP71B34 | cytochrome P450, family 71, subfamily B, polypeptide 34 | chr3:9639199-9640866 REVERSE LENGTH=500	4e-135	97.24	GO:0055114	oxidation-reduction process;	GO:0005506 GO:0016709 GO:0020037	iron ion binding; oxidoreductase activity, acting on paired donors, with incorporation or reduction of molecular oxygen, NAD(P)H as one donor, and incorporation of one atom of oxygen; heme binding;	GO:0009507 GO:0016020 GO:0016021	chloroplast; membrane; integral component of membrane	PF00067	p450;	AT3G26300|CYP71B34|cytochrome P450, family 71, subfamily B, polypeptide 34|F20C19.2
Glyma.01g180600	668	UniRef100_I1J914 Uncharacterized protein n=1 Tax=Glycine max TaxID=3847 RepID=I1J914_SOYBN	0	99.85	UniRef100_A0A445M4Q5 Pentatricopeptide repeat-containing protein, chloroplastic n=1 Tax=Glycine soja TaxID=3848 RepID=A0A445M4Q5_GLYSO	0	99.85	AT2G29760.1 | Symbols: OTP81 | Tetratricopeptide repeat (TPR)-like superfamily protein | chr2:12712884-12715100 FORWARD LENGTH=738	3e-160	95.96	GO:0009451 GO:0031425	RNA modification; chloroplast RNA processing;	GO:0008270	zinc ion binding;	GO:0009507 GO:0043231	chloroplast; intracellular membrane-bounded organelle	PF01535 PF13041	PPR; PPR_2;	AT2G29760|OTP81|QED1|ORGANELLE TRANSCRIPT PROCESSING 81|T27A16.14|T27A16_14
Glyma.01g181600	375	UniRef100_I1J923 Lipase_GDSL domain-containing protein n=2 Tax=Soja TaxID=1462606 RepID=I1J923_SOYBN	0	99.73	UniRef100_I1J923 Lipase_GDSL domain-containing protein n=2 Tax=Soja TaxID=1462606 RepID=I1J923_SOYBN	0	99.73	AT2G23540.1 | Symbols: | GDSL-like Lipase/Acylhydrolase superfamily protein | chr2:10024366-10026058 FORWARD LENGTH=387	0	97.6	GO:0016042	lipid catabolic process;	GO:0016788	hydrolase activity, acting on ester bonds;	GO:0005576 GO:0009507	extracellular region; chloroplast	PF00657	Lipase_GDSL;	AT2G23540|F26B6.19|F26B6_19
Glyma.01g182000	916	UniRef100_I1J927 Uncharacterized protein n=2 Tax=Soja TaxID=1462606 RepID=I1J927_SOYBN	0	99.89	UniRef100_A0A371ERT9 Extra-large guanine nucleotide-binding protein 1 (Fragment) n=1 Tax=Mucuna pruriens TaxID=157652 RepID=A0A371ERT9_MUCPR	0	99.89	AT2G23460.1 | Symbols: XLG1, ATXLG1 | extra-large G-protein 1 | chr2:9995699-9998945 FORWARD LENGTH=888	0	98.58	GO:0007188 GO:0009737 GO:0009744 GO:0009749 GO:0009750 GO:0010555 GO:2000067	adenylate cyclase-modulating G protein-coupled receptor signaling pathway; response to abscisic acid; response to sucrose; response to glucose; response to fructose; response to mannitol; regulation of root morphogenesis;	GO:0001664 GO:0003924 GO:0005525 GO:0031683 GO:0046872	G protein-coupled receptor binding; GTPase activity; GTP binding; G-protein beta/gamma-subunit complex binding; metal ion binding;	GO:0005634 GO:0005834 GO:0005886	nucleus; heterotrimeric G-protein complex; plasma membrane	PF00503	G-alpha;	AT2G23460|XLG1|ATXLG1|extra-large G-protein 1|F26B6.11|F26B6_11
Glyma.01g182600	170	UniRef100_I1J933 Uncharacterized protein n=2 Tax=Soja TaxID=1462606 RepID=I1J933_SOYBN	8e-112	99.41	UniRef100_UPI000F7C23BF uncharacterized protein LOC113868387 n=1 Tax=Abrus precatorius TaxID=3816 RepID=UPI000F7C23BF	9e-84	99.41	AT2G23670.1 | Symbols: YCF37 | homolog of Synechocystis YCF37 | chr2:10063307-10063810 REVERSE LENGTH=167	5e-50	87.65	GO:0008150	biological process;	GO:0003674	molecular function;	GO:0005773 GO:0009507 GO:0009534 GO:0009535 GO:0009579	vacuole; chloroplast; chloroplast thylakoid; chloroplast thylakoid membrane; thylakoid	NA	NA	AT2G23670|YCF37|homolog of Synechocystis YCF37|F26B6.28
Glyma.01g186600	478	UniRef100_C6TNI2 Lipase_3 domain-containing protein n=4 Tax=Soja TaxID=1462606 RepID=C6TNI2_SOYBN	0	99.79	UniRef100_C6TNI2 Lipase_3 domain-containing protein n=4 Tax=Soja TaxID=1462606 RepID=C6TNI2_SOYBN	0	99.79	AT5G42930.1 | Symbols: | alpha/beta-Hydrolases superfamily protein | chr5:17210738-17214152 REVERSE LENGTH=467	1e-177	94.35	NA	NA	NA	NA	GO:0005576	extracellular region	PF01764	Lipase_3;	AT5G42930
Glyma.01g187400	1545	UniRef100_K7K4M3 DNA polymerase n=1 Tax=Glycine max TaxID=3847 RepID=K7K4M3_SOYBN	0	99.94	UniRef100_K7K4M3 DNA polymerase n=1 Tax=Glycine max TaxID=3847 RepID=K7K4M3_SOYBN	0	99.94	AT5G67100.1 | Symbols: ICU2 | DNA-directed DNA polymerases | chr5:26776994-26785104 FORWARD LENGTH=1524	0	99.74	GO:0006272 GO:0006273 GO:0009910 GO:0009965 GO:0071897 GO:1902975	leading strand elongation; lagging strand elongation; negative regulation of flower development; leaf morphogenesis; DNA biosynthetic process; mitotic DNA replication initiation;	GO:0001882 GO:0003682 GO:0003688 GO:0003697 GO:0003887 GO:0017076 GO:0019103 GO:0046872 GO:0051539	nucleoside binding; chromatin binding; DNA replication origin binding; single-stranded DNA binding; DNA-directed DNA polymerase activity; purine nucleotide binding; pyrimidine nucleotide binding; metal ion binding; 4 iron, 4 sulfur cluster binding;	GO:0005634 GO:0005658	nucleus; alpha DNA polymerase:primase complex	PF12254 PF03104 PF08996 PF00136	DNA_pol_alpha_N; DNA_pol_B_exo1; zf-DNA_Pol; DNA_pol_B;	AT5G67100|ICU2|INCURVATA2|K21H1.14|K21H1_14
Glyma.01g190600	580	UniRef100_I1J9B3 Uncharacterized protein n=1 Tax=Glycine max TaxID=3847 RepID=I1J9B3_SOYBN	0	99.83	UniRef100_A0A1S3VPT7 probable indole-3-acetic acid-amido synthetase GH3.1 n=1 Tax=Vigna radiata var. radiata TaxID=3916 RepID=A0A1S3VPT7_VIGRR	0	99.48	AT2G14960.1 | Symbols: GH3.1 | Auxin-responsive GH3 family protein | chr2:6451659-6453670 REVERSE LENGTH=590	0	99.66	GO:0009733	response to auxin;	GO:0016881	acid-amino acid ligase activity;	GO:0005634 GO:0005737	nucleus; cytoplasm	PF03321	GH3;	AT2G14960|GH3.1|T26I20.12|T26I20_12
Glyma.01g191300	378	UniRef100_I1J9C1 PPM-type phosphatase domain-containing protein n=1 Tax=Glycine max TaxID=3847 RepID=I1J9C1_SOYBN	0	99.74	UniRef100_I1J9C1 PPM-type phosphatase domain-containing protein n=1 Tax=Glycine max TaxID=3847 RepID=I1J9C1_SOYBN	0	99.74	AT4G33920.1 | Symbols: | Protein phosphatase 2C family protein | chr4:16260876-16262703 FORWARD LENGTH=380	5e-179	99.47	GO:0006470	protein dephosphorylation;	GO:0004722 GO:0004724 GO:0046872	protein serine/threonine phosphatase activity; magnesium-dependent protein serine/threonine phosphatase activity; metal ion binding;	GO:0005739	mitochondrion	PF00481	PP2C;	AT4G33920|APD5|Arabidopsis Pp2c clade D 5|F17I5.110|F17I5_110
Glyma.01g192900	306	UniRef100_K7K4Q2 Queuosine salvage protein n=1 Tax=Glycine max TaxID=3847 RepID=K7K4Q2_SOYBN	0	99.67	UniRef100_K7K4Q2 Queuosine salvage protein n=1 Tax=Glycine max TaxID=3847 RepID=K7K4Q2_SOYBN	0	99.67	NA	NA	NA	NA	NA	NA	NA	NA	NA	PF10343	Q_salvage;	NA
Glyma.01g193200	890	UniRef100_I1J9D7 Formin-like protein n=1 Tax=Glycine max TaxID=3847 RepID=I1J9D7_SOYBN	0	99.89	UniRef100_I1J9D7 Formin-like protein n=1 Tax=Glycine max TaxID=3847 RepID=I1J9D7_SOYBN	0	99.89	AT5G67470.1 | Symbols: ATFH6, FH6 | formin homolog 6 | chr5:26926835-26930212 FORWARD LENGTH=899	0	51.24	NA	NA	GO:0003779	actin binding;	GO:0005618 GO:0005634 GO:0005730 GO:0005737 GO:0005819 GO:0005886 GO:0009524 GO:0016021	cell wall; nucleus; nucleolus; cytoplasm; spindle; plasma membrane; phragmoplast; integral component of membrane	PF02181	FH2;	AT5G67470
Glyma.01g193500	1247	UniRef100_K7K4Q6 Uncharacterized protein n=2 Tax=Glycine max TaxID=3847 RepID=K7K4Q6_SOYBN	0	99.92	UniRef100_A0A445M5D5 Condensin-2 complex subunit G2 isoform A n=1 Tax=Glycine soja TaxID=3848 RepID=A0A445M5D5_GLYSO	0	99.92	AT1G64960.1 | Symbols: | ARM repeat superfamily protein | chr1:24129918-24134049 FORWARD LENGTH=1203	0	99.92	NA	NA	NA	NA	GO:0005634 GO:0005739	nucleus; mitochondrion	PF12422	Condensin2nSMC;	AT1G64960
Glyma.01g196300	407	UniRef100_I1J9H2 Branched-chain-amino-acid aminotransferase n=1 Tax=Glycine max TaxID=3847 RepID=I1J9H2_SOYBN	0	99.75	UniRef100_I1J9H2 Branched-chain-amino-acid aminotransferase n=1 Tax=Glycine max TaxID=3847 RepID=I1J9H2_SOYBN	0	99.75	AT3G49680.1 | Symbols: ATBCAT-3, BCAT3 | branched-chain aminotransferase 3 | chr3:18422768-18425473 FORWARD LENGTH=413	0	99.51	GO:0009097 GO:0009098 GO:0009099	isoleucine biosynthetic process; leucine biosynthetic process; valine biosynthetic process;	GO:0004084 GO:0052654 GO:0052655 GO:0052656	branched-chain-amino-acid transaminase activity; L-leucine transaminase activity; L-valine transaminase activity; L-isoleucine transaminase activity;	GO:0005829 GO:0009507 GO:0009570	cytosol; chloroplast; chloroplast stroma	PF01063	Aminotran_4;	AT3G49680|ATBCAT-3|BCAT3|branched-chain aminotransferase 3|T16K5.30
Glyma.01g197600	979	UniRef100_K7K4S9 Protein kinase domain-containing protein n=1 Tax=Glycine max TaxID=3847 RepID=K7K4S9_SOYBN	0	99.9	UniRef100_K7K4S9 Protein kinase domain-containing protein n=1 Tax=Glycine max TaxID=3847 RepID=K7K4S9_SOYBN	0	99.9	AT5G65710.1 | Symbols: HSL2 | HAESA-like 2 | chr5:26292372-26295440 FORWARD LENGTH=993	0	96.83	GO:0006468 GO:0010102 GO:0010468 GO:0050829 GO:0060866	protein phosphorylation; lateral root morphogenesis; regulation of gene expression; defense response to Gram-negative bacterium; leaf abscission;	GO:0004674 GO:0005515 GO:0005524 GO:0016301	protein serine/threonine kinase activity; protein binding; ATP binding; kinase activity;	GO:0005886 GO:0016021	plasma membrane; integral component of membrane	PF08263 PF00560 PF00069 PF08263 PF00560 PF07714 PF13855	LRRNT_2; LRR_1; Pkinase; LRRNT_2; LRR_1; Pkinase_Tyr; LRR_8;	AT5G65710|HSL2|HAESA-like 2|MPA24.6|MPA24_6
Glyma.01g198900	339	UniRef100_I1J9J6 PPC domain-containing protein n=2 Tax=Soja TaxID=1462606 RepID=I1J9J6_SOYBN	0	99.71	UniRef100_I1J9J6 PPC domain-containing protein n=2 Tax=Soja TaxID=1462606 RepID=I1J9J6_SOYBN	0	99.71	AT4G17950.1 | Symbols: | AT hook motif DNA-binding family protein | chr4:9967295-9969007 REVERSE LENGTH=439	6e-65	77.29	NA	NA	GO:0003680	AT DNA binding;	GO:0005634 GO:0005829	nucleus; cytosol	PF03479	DUF296;	AT4G17950
Glyma.01g199600	754	UniRef100_I1J9K2 PPM-type phosphatase domain-containing protein n=1 Tax=Glycine max TaxID=3847 RepID=I1J9K2_SOYBN	0	99.87	UniRef100_I1J9K2 PPM-type phosphatase domain-containing protein n=1 Tax=Glycine max TaxID=3847 RepID=I1J9K2_SOYBN	0	99.87	AT2G35350.1 | Symbols: PLL1 | poltergeist like 1 | chr2:14881360-14884116 REVERSE LENGTH=783	0	99.73	GO:0006355 GO:0006470 GO:0007275 GO:0009826 GO:0009933 GO:0010074 GO:0018345 GO:0018377	regulation of transcription, DNA-templated; protein dephosphorylation; multicellular organism development; unidimensional cell growth; meristem structural organization; maintenance of meristem identity; protein palmitoylation; protein myristoylation;	GO:0004722 GO:0004724 GO:0005543 GO:0046872	protein serine/threonine phosphatase activity; magnesium-dependent protein serine/threonine phosphatase activity; phospholipid binding; metal ion binding;	GO:0005634 GO:0005886 GO:0009507	nucleus; plasma membrane; chloroplast	PF00481	PP2C;	AT2G35350|PLL1|poltergeist like 1|T32F12.27|T32F12_27
Glyma.01g204600	412	UniRef100_I1J9Q7 Glutamate dehydrogenase n=2 Tax=Soja TaxID=1462606 RepID=I1J9Q7_SOYBN	0	99.76	UniRef100_I1J9Q7 Glutamate dehydrogenase n=2 Tax=Soja TaxID=1462606 RepID=I1J9Q7_SOYBN	0	99.76	AT5G07440.1 | Symbols: GDH2 | glutamate dehydrogenase 2 | chr5:2356153-2358012 FORWARD LENGTH=411	0	99.76	GO:0006538 GO:0046686 GO:0055114	glutamate catabolic process; response to cadmium ion; oxidation-reduction process;	GO:0004352 GO:0004353 GO:0005507 GO:0005524 GO:0008270 GO:0050897	glutamate dehydrogenase (NAD+) activity; glutamate dehydrogenase [NAD(P)+] activity; copper ion binding; ATP binding; zinc ion binding; cobalt ion binding;	GO:0005737 GO:0005739 GO:0005774 GO:0005886	cytoplasm; mitochondrion; vacuolar membrane; plasma membrane	PF02812 PF00208	ELFV_dehydrog_N; ELFV_dehydrog;	AT5G07440|GDH2|glutamate dehydrogenase 2|T2I1.150|T2I1_150|GLUTAMATE DEHYDROGENASE 2
Glyma.01g204700	216	UniRef100_I1J9Q8 Uncharacterized protein n=2 Tax=Soja TaxID=1462606 RepID=I1J9Q8_SOYBN	4e-156	99.54	UniRef100_A0A371G7S8 Light-harvesting complex-like protein 3 isotype 1, chloroplastic (Fragment) n=1 Tax=Mucuna pruriens TaxID=157652 RepID=A0A371G7S8_MUCPR	2e-119	99.54	AT4G17600.1 | Symbols: LIL3:1 | Chlorophyll A-B binding family protein | chr4:9803759-9804714 FORWARD LENGTH=262	6e-86	73.61	GO:0006355 GO:0015979 GO:0018298 GO:1902326 GO:1904964 GO:1904966	regulation of transcription, DNA-templated; photosynthesis; protein-chromophore linkage; positive regulation of chlorophyll biosynthetic process; positive regulation of phytol biosynthetic process; positive regulation of vitamin E biosynthetic process;	GO:0003700 GO:0005515 GO:0016168 GO:0019899 GO:0042802 GO:0043495	DNA-binding transcription factor activity; protein binding; chlorophyll binding; enzyme binding; identical protein binding; protein membrane adaptor activity;	GO:0005829 GO:0009507 GO:0009523 GO:0009535 GO:0016021 GO:0042651	cytosol; chloroplast; photosystem II; chloroplast thylakoid membrane; integral component of membrane; thylakoid membrane	PF00504	Chloroa_b-bind;	AT4G17600|LIL3:1|light-harvesting-like 3:1|DL4835W|FCAALL.30
Glyma.01g204800	252	UniRef100_I1J9Q9 Uncharacterized protein n=3 Tax=Soja TaxID=1462606 RepID=I1J9Q9_SOYBN	0	99.6	UniRef100_A0A371EIM8 Expansin-like B1 (Fragment) n=1 Tax=Mucuna pruriens TaxID=157652 RepID=A0A371EIM8_MUCPR	2e-172	95.24	AT4G17030.1 | Symbols: ATEXLB1, EXPR, AT-EXPR, ATEXPR1, ATHEXP BETA 3.1, EXLB1 | expansin-like B1 | chr4:9581817-9583181 REVERSE LENGTH=250	8e-112	96.03	GO:0019953	sexual reproduction;	NA	NA	GO:0005576	extracellular region	PF03330 PF01357	DPBB_1; Pollen_allerg_1;	AT4G17030|ATEXLB1|EXPR|AT-EXPR|ATEXPR1|ATHEXP BETA 3.1|EXLB1|expansin-like B1|DL4545C|FCAALL.341
Glyma.01g206600	275	UniRef100_A0A0R0LKW8 AP2/ERF domain-containing protein n=1 Tax=Glycine max TaxID=3847 RepID=A0A0R0LKW8_SOYBN	0	99.64	UniRef100_A0A0R0LKW8 AP2/ERF domain-containing protein n=1 Tax=Glycine max TaxID=3847 RepID=A0A0R0LKW8_SOYBN	0	99.64	AT4G17500.1 | Symbols: ATERF-1, ERF-1 | ethylene responsive element binding factor 1 | chr4:9759405-9760211 FORWARD LENGTH=268	6e-82	89.09	GO:0001944 GO:0006355 GO:0006952 GO:0009624 GO:0009873 GO:0010200 GO:0045893 GO:0051301	vasculature development; regulation of transcription, DNA-templated; defense response; response to nematode; ethylene-activated signaling pathway; response to chitin; positive regulation of transcription, DNA-templated; cell division;	GO:0003677 GO:0003700 GO:0044212	DNA binding; DNA-binding transcription factor activity; transcription regulatory region DNA binding;	GO:0005634	nucleus	PF00847	AP2;	AT4G17500|ATERF-1|ERF-1|ERF1A|AtERF#100|ethylene responsive element binding factor 1|DL4785W|FCAALL.123
Glyma.01g209100	299	UniRef100_I1J9V7 Uncharacterized protein n=1 Tax=Glycine max TaxID=3847 RepID=I1J9V7_SOYBN	0	99.67	UniRef100_A0A445M6G9 Zinc finger protein ZAT9 n=1 Tax=Glycine soja TaxID=3848 RepID=A0A445M6G9_GLYSO	0	99.67	AT3G60580.1 | Symbols: | C2H2-like zinc finger protein | chr3:22394007-22394873 FORWARD LENGTH=288	4e-46	98.66	GO:0006355	regulation of transcription, DNA-templated;	GO:0003700 GO:0044212 GO:0046872	DNA-binding transcription factor activity; transcription regulatory region DNA binding; metal ion binding;	GO:0005634	nucleus	PF13912	zf-C2H2_6;	AT3G60580|T8B10.240
Glyma.01g209900	465	UniRef100_I1J9W5 CRAL-TRIO domain-containing protein n=1 Tax=Glycine max TaxID=3847 RepID=I1J9W5_SOYBN	0	99.78	UniRef100_I1J9W5 CRAL-TRIO domain-containing protein n=1 Tax=Glycine max TaxID=3847 RepID=I1J9W5_SOYBN	0	99.78	AT5G47510.1 | Symbols: | Sec14p-like phosphatidylinositol transfer family protein | chr5:19275048-19276999 FORWARD LENGTH=376	8e-138	73.55	NA	NA	NA	NA	GO:0005794	Golgi apparatus	PF00650	CRAL_TRIO;	AT5G47510
Glyma.01g210700	285	UniRef100_I1J9X2 Uncharacterized protein n=1 Tax=Glycine max TaxID=3847 RepID=I1J9X2_SOYBN	0	99.65	UniRef100_A0A1S3VPW3 uncharacterized protein LOC106777098 n=1 Tax=Vigna radiata var. radiata TaxID=3916 RepID=A0A1S3VPW3_VIGRR	3e-175	99.65	AT1G62520.1 | Symbols: | unknown protein; BEST Arabidopsis thaliana protein match is: unknown protein (TAIR:AT4G12450.1); Has 388 Blast hits to 388 proteins in 26 species: Archae - 0; Bacteria - 1; Metazoa - 0; Fungi - 8; Plants - 376; Viruses - 0; Other Eukaryotes - 3 (source: NCBI BLink). | chr1:23144506-23145348 FORWARD LENGTH=280	1e-93	99.65	GO:0008150	biological process;	NA	NA	GO:0005634	nucleus	NA	NA	AT1G62520|T3P18.8|T3P18_8
Glyma.01g212500	257	UniRef100_I1J9Z4 Uncharacterized protein n=2 Tax=Soja TaxID=1462606 RepID=I1J9Z4_SOYBN	0	99.61	UniRef100_A0A2P5F522 PPR containing protein n=1 Tax=Trema orientale TaxID=63057 RepID=A0A2P5F522_TREOI	6e-66	88.72	AT4G22758.1 | Symbols: | unknown protein; LOCATED IN: chloroplast; BEST Arabidopsis thaliana protein match is: unknown protein (TAIR:AT2G27830.1). | chr4:11958477-11959904 FORWARD LENGTH=255	2e-39	70.82	NA	NA	NA	NA	GO:0005634	nucleus	NA	NA	AT4G22758
Glyma.01g213100	301	UniRef100_A0A445M6A5 AT-hook motif nuclear-localized protein n=2 Tax=Soja TaxID=1462606 RepID=A0A445M6A5_GLYSO	0	99.67	UniRef100_A0A445M6A5 AT-hook motif nuclear-localized protein n=2 Tax=Soja TaxID=1462606 RepID=A0A445M6A5_GLYSO	0	99.67	AT2G45430.1 | Symbols: AHL22 | AT-hook motif nuclear-localized protein 22 | chr2:18727848-18728801 FORWARD LENGTH=317	7e-83	97.01	GO:0009640 GO:0009647 GO:0009908 GO:0010228	photomorphogenesis; skotomorphogenesis; flower development; vegetative to reproductive phase transition of meristem;	GO:0003680 GO:0003700 GO:0042826 GO:0043621	AT DNA binding; DNA-binding transcription factor activity; histone deacetylase binding; protein self-association;	GO:0005634	nucleus	PF03479	DUF296;	AT2G45430|AHL22|AT-hook motif nuclear-localized protein 22|F4L23.6
Glyma.01g213500	295	UniRef100_I1JA06 Uncharacterized protein n=1 Tax=Glycine max TaxID=3847 RepID=I1JA06_SOYBN	0	99.66	UniRef100_A0A445M6X2 TVP38/TMEM64 family membrane protein slr0305 n=1 Tax=Glycine soja TaxID=3848 RepID=A0A445M6X2_GLYSO	0	99.66	AT1G12450.1 | Symbols: | SNARE associated Golgi protein family | chr1:4244496-4245808 FORWARD LENGTH=303	3e-114	96.27	GO:0008150	biological process;	GO:0003674	molecular function;	GO:0005886 GO:0016021	plasma membrane; integral component of membrane	PF09335	SNARE_assoc;	AT1G12450|F5O11.19|F5O11_19
Glyma.01g213900	748	UniRef100_I1JA10 Uncharacterized protein n=1 Tax=Glycine max TaxID=3847 RepID=I1JA10_SOYBN	0	99.87	UniRef100_A0A445M6H1 Subtilisin-like protease SBT1.2 n=1 Tax=Glycine soja TaxID=3848 RepID=A0A445M6H1_GLYSO	0	99.87	AT3G14067.1 | Symbols: | Subtilase family protein | chr3:4658421-4660754 REVERSE LENGTH=777	0	95.05	GO:0006508 GO:0010150 GO:0010223	proteolysis; leaf senescence; secondary shoot formation;	GO:0004252	serine-type endopeptidase activity;	GO:0005576 GO:0005773 GO:0005774 GO:0005829 GO:0048046 GO:0099503	extracellular region; vacuole; vacuolar membrane; cytosol; apoplast; secretory vesicle	PF05922 PF02225 PF00082	Inhibitor_I9; PA; Peptidase_S8;	AT3G14067|SASP|Senescence-Associated Subtilisin Protease|MAG2.15
Glyma.01g216000	227	UniRef100_B3TPR9 CBF3 protein n=2 Tax=Soja TaxID=1462606 RepID=B3TPR9_SOYBN	3e-166	99.56	UniRef100_B3TPR9 CBF3 protein n=2 Tax=Soja TaxID=1462606 RepID=B3TPR9_SOYBN	3e-166	99.56	AT1G12610.1 | Symbols: DDF1 | Integrase-type DNA-binding superfamily protein | chr1:4290205-4290834 REVERSE LENGTH=209	2e-59	83.7	GO:0006355 GO:0009408 GO:0009414 GO:0009651 GO:0010371 GO:0019760 GO:0048510 GO:0050826 GO:0051510	regulation of transcription, DNA-templated; response to heat; response to water deprivation; response to salt stress; regulation of gibberellin biosynthetic process; glucosinolate metabolic process; regulation of timing of transition from vegetative to reproductive phase; response to freezing; regulation of unidimensional cell growth;	GO:0003700 GO:0005515 GO:0043565 GO:0044212	DNA-binding transcription factor activity; protein binding; sequence-specific DNA binding; transcription regulatory region DNA binding;	GO:0005634	nucleus	PF00847	AP2;	AT1G12610|DDF1|ATDDF1|DWARF AND DELAYED FLOWERING 1|T12C24.14|T12C24_14
Glyma.01g216200	184	UniRef100_I1JA36 AP2/ERF domain-containing protein n=2 Tax=Soja TaxID=1462606 RepID=I1JA36_SOYBN	6e-132	99.46	UniRef100_I1JA36 AP2/ERF domain-containing protein n=2 Tax=Soja TaxID=1462606 RepID=I1JA36_SOYBN	6e-132	99.46	AT5G52020.1 | Symbols: | Integrase-type DNA-binding superfamily protein | chr5:21124192-21124890 REVERSE LENGTH=232	7e-44	94.57	GO:0006355 GO:0009873 GO:0019760 GO:0050832	regulation of transcription, DNA-templated; ethylene-activated signaling pathway; glucosinolate metabolic process; defense response to fungus;	GO:0003700 GO:0005515 GO:0043565 GO:0044212	DNA-binding transcription factor activity; protein binding; sequence-specific DNA binding; transcription regulatory region DNA binding;	GO:0005634	nucleus	PF00847	AP2;	AT5G52020|MSG15.10|MSG15_10
Glyma.01g217100	782	UniRef100_K7K556 Uncharacterized protein n=3 Tax=Soja TaxID=1462606 RepID=K7K556_SOYBN	0	99.87	UniRef100_UPI00098DCCE6 serine/threonine-protein kinase STY46 isoform X2 n=1 Tax=Cajanus cajan TaxID=3821 RepID=UPI00098DCCE6	0	99.62	AT4G23050.2 | Symbols: | PAS domain-containing protein tyrosine kinase family protein | chr4:12080112-12083708 FORWARD LENGTH=736	0	96.04	GO:0006355 GO:0006468	regulation of transcription, DNA-templated; protein phosphorylation;	GO:0004672 GO:0004712 GO:0005524	protein kinase activity; protein serine/threonine/tyrosine kinase activity; ATP binding;	GO:0005634 GO:0005737 GO:0005829	nucleus; cytoplasm; cytosol	PF13426 PF07714	PAS_9; Pkinase_Tyr;	AT4G23050|F7H19.240|F7H19_240
Glyma.01g217500	435	UniRef100_I1JA49 Uncharacterized protein n=1 Tax=Glycine max TaxID=3847 RepID=I1JA49_SOYBN	0	99.77	UniRef100_A0A445M6S1 Transcription factor MYB3R-5 isoform A n=1 Tax=Glycine soja TaxID=3848 RepID=A0A445M6S1_GLYSO	0	99.08	AT5G02320.1 | Symbols: ATMYB3R5, MYB3R-5 | myb domain protein 3r-5 | chr5:483445-486347 REVERSE LENGTH=548	1e-77	85.75	GO:0008285 GO:0009723 GO:0009751 GO:0045892	negative regulation of cell population proliferation; response to ethylene; response to salicylic acid; negative regulation of transcription, DNA-templated;	GO:0003700	DNA-binding transcription factor activity;	GO:0005634	nucleus	PF00249	Myb_DNA-binding;	AT5G02320|ATMYB3R5|MYB3R-5|ARABIDOPSIS THALIANA MYB DOMAIN PROTEIN 3R5|myb domain protein 3r-5|T1E22.80|T1E22_80
Glyma.01g218100	1091	UniRef100_I1JA55 C2 NT-type domain-containing protein n=1 Tax=Glycine max TaxID=3847 RepID=I1JA55_SOYBN	0	99.91	UniRef100_I1JA55 C2 NT-type domain-containing protein n=1 Tax=Glycine max TaxID=3847 RepID=I1JA55_SOYBN	0	99.91	AT1G63300.1 | Symbols: | Myosin heavy chain-related protein | chr1:23482193-23486067 FORWARD LENGTH=1029	0	99.91	GO:0008150	biological process;	GO:0003674	molecular function;	GO:0005576	extracellular region	PF10358	NT-C2;	AT1G63300|F9N12.8|F9N12_8
Glyma.01g219300	446	UniRef100_A0A0R0LF51 Uncharacterized protein n=2 Tax=Soja TaxID=1462606 RepID=A0A0R0LF51_SOYBN	0	99.78	UniRef100_A0A0R0HAT7 Exostosin domain-containing protein n=3 Tax=Soja TaxID=1462606 RepID=A0A0R0HAT7_SOYBN	0	99.78	AT1G63450.1 | Symbols: RHS8 | root hair specific 8 | chr1:23532523-23534517 FORWARD LENGTH=664	1e-143	79.6	GO:0000271 GO:0006486 GO:0042546 GO:0048767	polysaccharide biosynthetic process; protein glycosylation; cell wall biogenesis; root hair elongation;	GO:0016757	transferase activity, transferring glycosyl groups;	GO:0000139 GO:0005794 GO:0016021	Golgi membrane; Golgi apparatus; integral component of membrane	PF03016	Exostosin;	AT1G63450|RHS8|XUT1|root hair specific 8|XYLOGLUCAN-SPECIFIC GALACTURONOSYLTRANSFERASE 1|F2K11.17|F2K11_17
Glyma.01g219800	1831	UniRef100_K7K577 Uncharacterized protein n=2 Tax=Soja TaxID=1462606 RepID=K7K577_SOYBN	0	99.95	UniRef100_A0A445HW19 Lysine-specific demethylase rbr-2 isoform B n=1 Tax=Glycine soja TaxID=3848 RepID=A0A445HW19_GLYSO	0	99.95	AT1G63490.1 | Symbols: | transcription factor jumonji (jmjC) domain-containing protein | chr1:23544938-23551946 REVERSE LENGTH=1116	0	51.5	GO:0006355 GO:0009414 GO:0034721	regulation of transcription, DNA-templated; response to water deprivation; histone H3-K4 demethylation, trimethyl-H3-K4-specific;	GO:0003677 GO:0003700	DNA binding; DNA-binding transcription factor activity;	GO:0005634	nucleus	PF01388 PF02928 PF02375 PF00628 PF08429 PF02373	ARID; zf-C5HC2; JmjN; PHD; PLU-1; JmjC;	AT1G63490|JMJ17|Jumonji domain-containing protein 17|F2K11.14|F2K11_14
Glyma.01g220900	1000	UniRef100_A0A445M6N8 TIR domain-containing protein n=2 Tax=Soja TaxID=1462606 RepID=A0A445M6N8_GLYSO	0	99.9	UniRef100_A0A445M6N8 TIR domain-containing protein n=2 Tax=Soja TaxID=1462606 RepID=A0A445M6N8_GLYSO	0	99.9	AT4G23440.1 | Symbols: | Disease resistance protein (TIR-NBS class) | chr4:12237765-12240659 FORWARD LENGTH=964	0	99.9	GO:0000725 GO:0007165	recombinational repair; signal transduction;	NA	NA	GO:0005634 GO:0005886	nucleus; plasma membrane	PF13676	TIR_2;	AT4G23440|F16G20.140|F16G20_140
Glyma.01g222700	928	UniRef100_I1JAA1 Uncharacterized protein n=2 Tax=Soja TaxID=1462606 RepID=I1JAA1_SOYBN	0	99.89	UniRef100_A0A445M7C7 Respiratory burst oxidase-like protein F isoform B n=1 Tax=Glycine soja TaxID=3848 RepID=A0A445M7C7_GLYSO	0	96.12	AT1G64060.1 | Symbols: ATRBOH F, ATRBOHF, RBOHAP108, RBOHF, RBOH F | respiratory burst oxidase protein F | chr1:23770266-23776317 FORWARD LENGTH=944	0	99.03	GO:0002679 GO:0006952 GO:0007231 GO:0009723 GO:0009738 GO:0009873 GO:0010119 GO:0033500 GO:0043069 GO:0050665 GO:0052542 GO:0055114 GO:0072593	respiratory burst involved in defense response; defense response; osmosensory signaling pathway; response to ethylene; abscisic acid-activated signaling pathway; ethylene-activated signaling pathway; regulation of stomatal movement; carbohydrate homeostasis; negative regulation of programmed cell death; hydrogen peroxide biosynthetic process; defense response by callose deposition; oxidation-redu…	GO:0004601 GO:0005509 GO:0005515 GO:0016174	peroxidase activity; calcium ion binding; protein binding; NAD(P)H oxidase (H(2)O(2)-forming activity;	GO:0005886 GO:0005887 GO:0016021	plasma membrane; integral component of plasma membrane; integral component of membrane	PF01794 PF08022 PF08414 PF08030	Ferric_reduct; FAD_binding_8; NADPH_Ox; NAD_binding_6;	AT1G64060|ATRBOH F|ATRBOHF|RBOHAP108|RBOHF|RBOH F|respiratory burst oxidase protein F|ARABIDOPSIS THALIANA RESPIRATORY BURST OXIDASE HOMOLOG F|F22C12.18|F22C12_18|CYTOCHROME B245 BETA CHAIN HOMOLOG RBOHAP108
Glyma.01g223300	515	UniRef100_K7K598 Uncharacterized protein n=3 Tax=Soja TaxID=1462606 RepID=K7K598_SOYBN	0	99.81	UniRef100_UPI0010165963 aluminum-activated malate transporter 9-like n=1 Tax=Vigna unguiculata TaxID=3917 RepID=UPI0010165963	0	98.83	AT3G18440.1 | Symbols: AtALMT9, ALMT9 | aluminum-activated malate transporter 9 | chr3:6328181-6330652 FORWARD LENGTH=598	1e-92	93.4	GO:0015743	malate transport;	GO:0005253	anion channel activity;	GO:0005886 GO:0009705 GO:0016021	plasma membrane; plant-type vacuole membrane; integral component of membrane	PF13515	FUSC_2;	AT3G18440|AtALMT9|ALMT9|aluminum-activated malate transporter 9|MYF24.16
Glyma.01g223400	671	UniRef100_K7K599 Uncharacterized protein n=1 Tax=Glycine max TaxID=3847 RepID=K7K599_SOYBN	0	99.85	UniRef100_UPI00098DCAD4 uncharacterized protein LOC109789986 n=1 Tax=Cajanus cajan TaxID=3821 RepID=UPI00098DCAD4	0	99.85	AT1G64140.1 | Symbols: | BEST Arabidopsis thaliana protein match is: loricrin-related (TAIR:AT5G64550.1); Has 3596 Blast hits to 2004 proteins in 150 species: Archae - 0; Bacteria - 54; Metazoa - 1597; Fungi - 38; Plants - 513; Viruses - 9; Other Eukaryotes - 1385 (source: NCBI BLink). | chr1:23804069-23806009 REVERSE LENGTH=646	0	97.17	GO:0008150	biological process;	GO:0003674	molecular function;	GO:0005576	extracellular region	NA	NA	AT1G64140|F22C12.10|F22C12_10
Glyma.01g223500	348	UniRef100_C6T9P2 GDT1 family protein n=1 Tax=Glycine max TaxID=3847 RepID=C6T9P2_SOYBN	0	99.71	UniRef100_C6T9P2 GDT1 family protein n=1 Tax=Glycine max TaxID=3847 RepID=C6T9P2_SOYBN	0	99.71	AT1G64150.1 | Symbols: | Uncharacterized protein family (UPF0016) | chr1:23809047-23812579 REVERSE LENGTH=370	1e-123	76.44	GO:0006816 GO:0006828 GO:0010270 GO:0071421	calcium ion transport; manganese ion transport; photosystem II oxygen evolving complex assembly; manganese ion transmembrane transport;	GO:0005384 GO:0015095 GO:0046873	manganese ion transmembrane transporter activity; magnesium ion transmembrane transporter activity; metal ion transmembrane transporter activity;	GO:0009535 GO:0016021 GO:0031969	chloroplast thylakoid membrane; integral component of membrane; chloroplast membrane	PF01169	UPF0016;	AT1G64150|PAM71|CCHA1|PHOTOSYNTHESIS AFFECTED MUTANT71|Ca(2+)/H(+) antiporter1|F22C12.9|F22C12_9
Glyma.01g224000	636	UniRef100_K7K5A6 Protein kinase domain-containing protein n=2 Tax=Glycine max TaxID=3847 RepID=K7K5A6_SOYBN	0	99.84	UniRef100_K7K5A6 Protein kinase domain-containing protein n=2 Tax=Glycine max TaxID=3847 RepID=K7K5A6_SOYBN	0	99.84	AT4G23740.1 | Symbols: | Leucine-rich repeat protein kinase family protein | chr4:12367063-12369159 FORWARD LENGTH=638	0	90.25	GO:0006468	protein phosphorylation;	GO:0004672 GO:0005515 GO:0005524 GO:0016301	protein kinase activity; protein binding; ATP binding; kinase activity;	GO:0005886 GO:0016021	plasma membrane; integral component of membrane	PF08263 PF00069	LRRNT_2; Pkinase;	AT4G23740|F9D16.210|F9D16_210
Glyma.01g224300	696	UniRef100_I1JAC1 Uncharacterized protein n=2 Tax=Soja TaxID=1462606 RepID=I1JAC1_SOYBN	0	99.86	UniRef100_A0A151TK63 Crooked neck-like protein 1 n=1 Tax=Cajanus cajan TaxID=3821 RepID=A0A151TK63_CAJCA	0	99.86	AT5G41770.1 | Symbols: | crooked neck protein, putative / cell cycle protein, putative | chr5:16718021-16720936 FORWARD LENGTH=705	0	99.71	GO:0000245 GO:0000398	spliceosomal complex assembly; mRNA splicing, via spliceosome;	NA	NA	GO:0000974 GO:0005634 GO:0009536 GO:0071007 GO:0071013 GO:0071014	Prp19 complex; nucleus; plastid; U2-type catalytic step 2 spliceosome; catalytic step 2 spliceosome; post-mRNA release spliceosomal complex	PF02184	HAT;	AT5G41770|K16L22.5|K16L22_5
Glyma.01g226000	358	UniRef100_A0A0R0LER5 Lipase_3 domain-containing protein n=4 Tax=Soja TaxID=1462606 RepID=A0A0R0LER5_SOYBN	0	99.72	UniRef100_A0A0R0LER5 Lipase_3 domain-containing protein n=4 Tax=Soja TaxID=1462606 RepID=A0A0R0LER5_SOYBN	0	99.72	AT4G10955.1 | Symbols: | alpha/beta-Hydrolases superfamily protein | chr4:6713778-6715372 REVERSE LENGTH=350	5e-160	96.09	GO:0016042	lipid catabolic process;	GO:0016787	hydrolase activity;	GO:0005634	nucleus	PF01764	Lipase_3;	AT4G10955
Glyma.01g227200	647	UniRef100_I1JAF9 Uncharacterized protein n=1 Tax=Glycine max TaxID=3847 RepID=I1JAF9_SOYBN	0	99.85	UniRef100_A0A445M752 Zinc finger CCCH domain-containing protein 55 isoform A n=1 Tax=Glycine soja TaxID=3848 RepID=A0A445M752_GLYSO	0	99.85	AT5G12440.1 | Symbols: | CCCH-type zinc fingerfamily protein with RNA-binding domain | chr5:4035891-4038604 REVERSE LENGTH=650	4e-136	99.38	NA	NA	GO:0003677 GO:0003723 GO:0046872	DNA binding; RNA binding; metal ion binding;	GO:0005634	nucleus	PF00642 PF13893 PF00642 PF00076	zf-CCCH; RRM_5; zf-CCCH; RRM_1;	AT5G12440
Glyma.01g227300	198	UniRef100_I1JAG0 RRM domain-containing protein n=1 Tax=Glycine max TaxID=3847 RepID=I1JAG0_SOYBN	9e-141	99.49	UniRef100_I1JAG0 RRM domain-containing protein n=1 Tax=Glycine max TaxID=3847 RepID=I1JAG0_SOYBN	9e-141	99.49	AT1G51510.1 | Symbols: Y14 | RNA-binding (RRM/RBD/RNP motifs) family protein | chr1:19103072-19104753 REVERSE LENGTH=202	2e-80	88.38	GO:0000184 GO:0000381 GO:0010628	nuclear-transcribed mRNA catabolic process, nonsense-mediated decay; regulation of alternative mRNA splicing, via spliceosome; positive regulation of gene expression;	GO:0003729 GO:0005515	mRNA binding; protein binding;	GO:0005634 GO:0005654 GO:0005730 GO:0005737 GO:0005829 GO:0016604 GO:0035145	nucleus; nucleoplasm; nucleolus; cytoplasm; cytosol; nuclear body; exon-exon junction complex	PF00076	RRM_1;	AT1G51510|Y14|F5D21.5|F5D21_5
Glyma.01g227700	351	UniRef100_I1JAG5 Uncharacterized protein n=1 Tax=Glycine max TaxID=3847 RepID=I1JAG5_SOYBN	0	99.72	UniRef100_A0A445M717 Exosome complex component RRP45B isoform B n=1 Tax=Glycine soja TaxID=3848 RepID=A0A445M717_GLYSO	0	99.72	AT3G60500.1 | Symbols: CER7, G3 | 3'-5'-exoribonuclease family protein | chr3:22354245-22356440 FORWARD LENGTH=438	2e-160	98.58	GO:0000467 GO:0010025 GO:0016075 GO:0034427 GO:0034473 GO:0034475 GO:0034476 GO:0043928 GO:0071028 GO:0071035 GO:0071038 GO:0071042	exonucleolytic trimming to generate mature 3'-end of 5.8S rRNA from tricistronic rRNA transcript (SSU-rRNA, 5.8S rRNA, LSU-rRNA); wax biosynthetic process; rRNA catabolic process; nuclear-transcribed mRNA catabolic process, exonucleolytic, 3'-5'; U1 snRNA 3'-end processing; U4 snRNA 3'-end processing; U5 snRNA 3'-end processing; exonucleolytic catabolism of deadenylated mRNA; nuclear mRNA surveil…	GO:0000175 GO:0017091	3'-5'-exoribonuclease activity; AU-rich element binding;	GO:0000176 GO:0000177 GO:0005634 GO:0005737 GO:0005829	nuclear exosome (RNase complex); cytoplasmic exosome (RNase complex); nucleus; cytoplasm; cytosol	PF03725 PF01138	RNase_PH_C; RNase_PH;	AT3G60500|CER7|G3|ECERIFERUM 7|T8B10.160
Glyma.01g229400	1105	UniRef100_A0A445M785 DEAD-box ATP-dependent RNA helicase 45 isoform A n=2 Tax=Soja TaxID=1462606 RepID=A0A445M785_GLYSO	0	99.91	UniRef100_A0A445M785 DEAD-box ATP-dependent RNA helicase 45 isoform A n=2 Tax=Soja TaxID=1462606 RepID=A0A445M785_GLYSO	0	99.91	AT3G09620.1 | Symbols: | P-loop containing nucleoside triphosphate hydrolases superfamily protein | chr3:2949152-2952205 REVERSE LENGTH=989	0	82.17	GO:0000398	mRNA splicing, via spliceosome;	GO:0003723 GO:0003724 GO:0005524	RNA binding; RNA helicase activity; ATP binding;	GO:0005634	nucleus	PF00271 PF00270	Helicase_C; DEAD;	AT3G09620|F11F8.21
Glyma.01g229500	628	UniRef100_I1JAI6 PWWP domain-containing protein n=2 Tax=Glycine max TaxID=3847 RepID=I1JAI6_SOYBN	0	99.84	UniRef100_I1JAI6 PWWP domain-containing protein n=2 Tax=Glycine max TaxID=3847 RepID=I1JAI6_SOYBN	0	99.84	AT3G03140.1 | Symbols: | Tudor/PWWP/MBT superfamily protein | chr3:724348-727093 FORWARD LENGTH=769	6e-64	76.91	GO:0010228 GO:0090351 GO:0097298	vegetative to reproductive phase transition of meristem; seedling development; regulation of nucleus size;	GO:0005515 GO:0042393	protein binding; histone binding;	GO:0005634 GO:0009506	nucleus; plasmodesma	PF00855	PWWP;	AT3G03140|PWO1|PWWP1|PWWP-DOMAIN INTERACTOR OF POLYCOMBS1|PRO-TRP-PRO-TRP protein 1|T17B22.17|T17B22_17
Glyma.01g230850	163	UniRef100_A0A445I169 Serine/threonine-protein kinase PCRK1 isoform A n=2 Tax=Soja TaxID=1462606 RepID=A0A445I169_GLYSO	4e-48	55.83	UniRef100_A0A445I169 Serine/threonine-protein kinase PCRK1 isoform A n=2 Tax=Soja TaxID=1462606 RepID=A0A445I169_GLYSO	4e-48	55.83	NA	NA	NA	NA	NA	NA	NA	NA	NA	NA	NA	NA
Glyma.01g231000	204	UniRef100_A0A445M769 Ethylene-responsive transcription factor ERF021 n=2 Tax=Soja TaxID=1462606 RepID=A0A445M769_GLYSO	6e-150	99.51	UniRef100_A0A445M769 Ethylene-responsive transcription factor ERF021 n=2 Tax=Soja TaxID=1462606 RepID=A0A445M769_GLYSO	6e-150	99.51	AT1G71450.1 | Symbols: | Integrase-type DNA-binding superfamily protein | chr1:26927088-26927639 FORWARD LENGTH=183	2e-51	89.71	GO:0006355 GO:0009873	regulation of transcription, DNA-templated; ethylene-activated signaling pathway;	GO:0003677 GO:0003700	DNA binding; DNA-binding transcription factor activity;	GO:0005634	nucleus	PF00847	AP2;	AT1G71450|FUF1|FYF UP-REGULATING 321 FACTOR 1|F26A9.17
Glyma.01g231800	273	UniRef100_I1JAL0 Uncharacterized protein n=1 Tax=Glycine max TaxID=3847 RepID=I1JAL0_SOYBN	0	99.63	UniRef100_UPI00098DB90C uncharacterized protein LOC109810938 n=1 Tax=Cajanus cajan TaxID=3821 RepID=UPI00098DB90C	1e-138	99.63	AT4G32480.1 | Symbols: | Protein of unknown function (DUF506) _x0001_| chr4:15676488-15677776 FORWARD LENGTH=287	3e-43	85.35	GO:0071456	cellular response to hypoxia;	GO:0003674	molecular function;	GO:0005634	nucleus	PF04720	PDDEXK_6;	AT4G32480|F8B4.180|F8B4_180
Glyma.01g232100	554	UniRef100_I1JAL3 Uncharacterized protein n=3 Tax=Soja TaxID=1462606 RepID=I1JAL3_SOYBN	0	99.82	UniRef100_A0A151SCZ9 Medium-chain-fatty-acid--CoA ligase n=2 Tax=Cajanus cajan TaxID=3821 RepID=A0A151SCZ9_CAJCA	0	99.82	AT1G20560.1 | Symbols: AAE1 | acyl activating enzyme 1 | chr1:7119927-7121730 REVERSE LENGTH=556	0	99.82	NA	NA	GO:0016208	AMP binding;	GO:0005777 GO:0009507	peroxisome; chloroplast	PF13193 PF00501	AMP-binding_C; AMP-binding;	AT1G20560
Glyma.01g233100	306	UniRef100_I1JAM6 Protein kinase domain-containing protein n=3 Tax=Soja TaxID=1462606 RepID=I1JAM6_SOYBN	0	99.67	UniRef100_I1JAM6 Protein kinase domain-containing protein n=3 Tax=Soja TaxID=1462606 RepID=I1JAM6_SOYBN	0	99.67	AT5G16810.1 | Symbols: | Protein kinase superfamily protein | chr5:5526860-5529878 REVERSE LENGTH=418	6e-124	87.25	GO:0006468	protein phosphorylation;	GO:0004672 GO:0005524	protein kinase activity; ATP binding;	GO:0009507	chloroplast	PF00069	Pkinase;	AT5G16810|F5E19.150|F5E19_150
Glyma.01g233400	338	UniRef100_A0A0B2RQP8 Transcription factor MYB39 n=2 Tax=Glycine soja TaxID=3848 RepID=A0A0B2RQP8_GLYSO	0	99.7	UniRef100_A0A0B2RQP8 Transcription factor MYB39 n=2 Tax=Glycine soja TaxID=3848 RepID=A0A0B2RQP8_GLYSO	0	99.7	AT5G16770.1 | Symbols: AtMYB9, MYB9 | myb domain protein 9 | chr5:5515209-5516734 FORWARD LENGTH=336	9e-84	97.34	GO:0030154	cell differentiation;	GO:0003677 GO:0003700 GO:0005515 GO:0043565 GO:0044212	DNA binding; DNA-binding transcription factor activity; protein binding; sequence-specific DNA binding; transcription regulatory region DNA binding;	GO:0005634	nucleus	PF00249	Myb_DNA-binding;	AT5G16770|AtMYB9|MYB9|myb domain protein 9|F5E19.110|F5E19_110
Glyma.01g233500	323	UniRef100_I1JAN1 NERD domain-containing protein n=2 Tax=Soja TaxID=1462606 RepID=I1JAN1_SOYBN	0	99.69	UniRef100_I1JAN1 NERD domain-containing protein n=2 Tax=Soja TaxID=1462606 RepID=I1JAN1_SOYBN	0	99.69	AT1G65020.1 | Symbols: | FUNCTIONS IN: molecular_function unknown; INVOLVED IN: biological_process unknown; LOCATED IN: endoplasmic reticulum, plasma membrane; EXPRESSED IN: 23 plant structures; EXPRESSED DURING: 13 growth stages; CONTAINS InterPro DOMAIN/s: NERD (InterPro:IPR011528); Has 69 Blast hits to 69 proteins in 27 species: Archae - 0; Bacteria - 18; Metazoa - 8; Fungi - 0; Plants - 36; V…	2e-154	96.28	GO:0008150	biological process;	GO:0003674	molecular function;	GO:0005634 GO:0005783 GO:0005886	nucleus; endoplasmic reticulum; plasma membrane	PF08378	NERD;	AT1G65020|F13O11.31
Glyma.01g234300	1480	UniRef100_K7K5H0 PHD-type domain-containing protein n=2 Tax=Glycine max TaxID=3847 RepID=K7K5H0_SOYBN	0	99.93	UniRef100_K7K5H0 PHD-type domain-containing protein n=2 Tax=Glycine max TaxID=3847 RepID=K7K5H0_SOYBN	0	99.93	AT3G02890.1 | Symbols: | RING/FYVE/PHD zinc finger superfamily protein | chr3:640828-645303 FORWARD LENGTH=994	2e-128	64.46	GO:0008150	biological process;	NA	NA	GO:0005634	nucleus	NA	NA	AT3G02890|AIPP2|ASI1-Immunoprecipitated Protein 2|F13E7.16|F13E7_16
Glyma.01g235000	261	UniRef100_A0A445M7M7 AAI domain-containing protein n=2 Tax=Glycine soja TaxID=3848 RepID=A0A445M7M7_GLYSO	0	99.62	UniRef100_A0A445M7M7 AAI domain-containing protein n=2 Tax=Glycine soja TaxID=3848 RepID=A0A445M7M7_GLYSO	0	99.62	AT3G22620.1 | Symbols: | Bifunctional inhibitor/lipid-transfer protein/seed storage 2S albumin superfamily protein | chr3:8008615-8009415 FORWARD LENGTH=203	7e-41	75.48	NA	NA	NA	NA	GO:0009941	chloroplast envelope	PF14368	LTP_2;	AT3G22620
Glyma.01g235100	226	UniRef100_K7K5H8 AAI domain-containing protein n=1 Tax=Glycine max TaxID=3847 RepID=K7K5H8_SOYBN	1e-155	99.56	UniRef100_K7K5H8 AAI domain-containing protein n=1 Tax=Glycine max TaxID=3847 RepID=K7K5H8_SOYBN	1e-155	99.56	AT4G14805.1 | Symbols: | Bifunctional inhibitor/lipid-transfer protein/seed storage 2S albumin superfamily protein | chr4:8502374-8503199 REVERSE LENGTH=219	3e-28	42.48	GO:0008150	biological process;	GO:0003674	molecular function;	GO:0031225	anchored component of membrane	PF14368	LTP_2;	AT4G14805
Glyma.01g235600	403	UniRef100_A0A0B2RPE7 12-oxophytodienoate reductase 2 n=3 Tax=Soja TaxID=1462606 RepID=A0A0B2RPE7_GLYSO	0	99.75	UniRef100_A0A0B2RPE7 12-oxophytodienoate reductase 2 n=3 Tax=Soja TaxID=1462606 RepID=A0A0B2RPE7_GLYSO	0	99.75	AT1G76690.1 | Symbols: OPR2, ATOPR2 | 12-oxophytodienoate reductase 2 | chr1:28778976-28780355 FORWARD LENGTH=374	0	89.08	GO:0009611 GO:0009695 GO:0031408 GO:0055114	response to wounding; jasmonic acid biosynthetic process; oxylipin biosynthetic process; oxidation-reduction process;	GO:0010181 GO:0016491 GO:0016629	FMN binding; oxidoreductase activity; 12-oxophytodienoate reductase activity;	GO:0005737 GO:0005739	cytoplasm; mitochondrion	PF00724	Oxidored_FMN;	AT1G76690|OPR2|ATOPR2|12-oxophytodienoate reductase 2|ARABIDOPSIS 12-OXOPHYTODIENOATE REDUCTASE 2|F28O16.6|F28O16_6|12-OXOPHYTODIENOATE REDUCTASE 2
Glyma.01g239800	236	UniRef100_A0A0B2RF09 Protein FANTASTIC FOUR 3 n=2 Tax=Soja TaxID=1462606 RepID=A0A0B2RF09_GLYSO	4e-173	99.58	UniRef100_A0A0B2RF09 Protein FANTASTIC FOUR 3 n=2 Tax=Soja TaxID=1462606 RepID=A0A0B2RF09_GLYSO	4e-173	99.58	AT5G19260.1 | Symbols: | Protein of unknown function (DUF3049) | chr5:6479494-6480360 REVERSE LENGTH=288	6e-23	44.49	NA	NA	NA	NA	GO:0005634	nucleus	PF11250	FAF;	AT5G19260
Glyma.01g241200	416	UniRef100_A0A445M7Y4 Uncharacterized protein n=1 Tax=Glycine soja TaxID=3848 RepID=A0A445M7Y4_GLYSO	0	99.76	UniRef100_UPI0007193760 LOW QUALITY PROTEIN: uncharacterized protein LOC100816033 n=1 Tax=Glycine max TaxID=3847 RepID=UPI0007193760	0	99.76	AT1G10020.1 | Symbols: | Protein of unknown function (DUF1005) | chr1:3269939-3271732 REVERSE LENGTH=461	8e-131	99.28	GO:0008150	biological process;	GO:0003674	molecular function;	GO:0005634	nucleus	PF06219	DUF1005;	AT1G10020|T27I1.4|T27I1_4
Glyma.01g244200	251	UniRef100_A0A0B2REZ8 Methylthioribose kinase n=1 Tax=Glycine soja TaxID=3848 RepID=A0A0B2REZ8_GLYSO	3e-175	94.82	UniRef100_A0A0B2REZ8 Methylthioribose kinase n=1 Tax=Glycine soja TaxID=3848 RepID=A0A0B2REZ8_GLYSO	3e-175	94.82	AT1G49820.1 | Symbols: ATMTK, MTK | S-methyl-5-thioribose kinase | chr1:18443005-18444907 FORWARD LENGTH=420	7e-120	96.02	GO:0016310 GO:0019509	phosphorylation; L-methionine salvage from methylthioadenosine;	GO:0005524 GO:0042802 GO:0046522	ATP binding; identical protein binding; S-methyl-5-thioribose kinase activity;	GO:0005829	cytosol	PF01636	APH;	AT1G49820|ATMTK|MTK|MTK1|S-methyl-5-thioribose kinase|5-methylthioribose kinase 1|F10F5.1|F10F5_1
Glyma.01g245600	159	UniRef100_I1JB18 DnaJ-X domain-containing protein n=1 Tax=Glycine max TaxID=3847 RepID=I1JB18_SOYBN	2e-113	99.37	UniRef100_I1JB18 DnaJ-X domain-containing protein n=1 Tax=Glycine max TaxID=3847 RepID=I1JB18_SOYBN	2e-113	99.37	AT1G21080.3 | Symbols: | DNAJ heat shock N-terminal domain-containing protein | chr1:7378822-7382275 REVERSE LENGTH=400	2e-58	94.97	NA	NA	NA	NA	GO:0005634 GO:0005737 GO:0005794	nucleus; cytoplasm; Golgi apparatus	PF14308	DnaJ-X;	AT1G21080
Glyma.02g001700	367	UniRef100_A0A445LHK9 Uncharacterized protein n=2 Tax=Soja TaxID=1462606 RepID=A0A445LHK9_GLYSO	0	99.73	UniRef100_A0A1S3V8W8 uncharacterized protein LOC106772733 n=1 Tax=Vigna radiata var. radiata TaxID=3916 RepID=A0A1S3V8W8_VIGRR	0	99.73	AT3G22970.1 | Symbols: | Protein of unknown function (DUF506) _x0001_| chr3:8152592-8153881 FORWARD LENGTH=370	6e-112	98.91	GO:0008150	biological process;	GO:0003674	molecular function;	GO:0005634 GO:0009507	nucleus; chloroplast	PF04720	PDDEXK_6;	AT3G22970|F5N5.17
Glyma.02g001800	202	UniRef100_K7K5Q8 Uncharacterized protein n=1 Tax=Glycine max TaxID=3847 RepID=K7K5Q8_SOYBN	7e-134	99.5	UniRef100_UPI00098D9792 extensin n=1 Tax=Cajanus cajan TaxID=3821 RepID=UPI00098D9792	4e-15	64.85	NA	NA	NA	NA	NA	NA	NA	NA	NA	NA	NA	NA
Glyma.02g002000	344	UniRef100_I1JB52 SAM_MPBQ_MSBQ_MT domain-containing protein n=1 Tax=Glycine max TaxID=3847 RepID=I1JB52_SOYBN	0	99.71	UniRef100_I1JB52 SAM_MPBQ_MSBQ_MT domain-containing protein n=1 Tax=Glycine max TaxID=3847 RepID=I1JB52_SOYBN	0	99.71	AT3G63410.1 | Symbols: APG1, VTE3, IEP37, E37 | S-adenosyl-L-methionine-dependent methyltransferases superfamily protein | chr3:23415816-23417002 REVERSE LENGTH=338	2e-180	99.71	GO:0010189 GO:0010236 GO:0032259	vitamin E biosynthetic process; plastoquinone biosynthetic process; methylation;	GO:0008757 GO:0051741 GO:0102550	S-adenosylmethionine-dependent methyltransferase activity; 2-methyl-6-phytyl-1,4-benzoquinone methyltransferase activity; 2-methyl-6-geranylgeranyl-1,4-benzoquinol methyltransferase activity;	GO:0005829 GO:0009507 GO:0009536 GO:0009706 GO:0009941 GO:0016021	cytosol; chloroplast; plastid; chloroplast inner membrane; chloroplast envelope; integral component of membrane	PF08241	Methyltransf_11;	AT3G63410|APG1|VTE3|IEP37|E37|ALBINO OR PALE GREEN MUTANT 1|VITAMIN E DEFECTIVE 3|INNER ENVELOPE PROTEIN 37|MAA21.40|IEP37
Glyma.02g003700	764	UniRef100_I1JB68 Uncharacterized protein n=1 Tax=Glycine max TaxID=3847 RepID=I1JB68_SOYBN	0	99.87	UniRef100_A0A514TNN3 PHO1 n=1 Tax=Glycine soja TaxID=3848 RepID=A0A514TNN3_GLYSO	0	99.87	AT3G23430.1 | Symbols: PHO1, ATPHO1 | phosphate 1 | chr3:8387818-8393242 REVERSE LENGTH=782	0	99.87	GO:0006799 GO:0006817 GO:0016036 GO:0048016	polyphosphate biosynthetic process; phosphate ion transport; cellular response to phosphate starvation; inositol phosphate-mediated signaling;	GO:0000822 GO:0015114	inositol hexakisphosphate binding; phosphate ion transmembrane transporter activity;	GO:0000139 GO:0005622 GO:0005737 GO:0005739 GO:0005789 GO:0005794 GO:0005802 GO:0005886 GO:0016021	Golgi membrane; intracellular; cytoplasm; mitochondrion; endoplasmic reticulum membrane; Golgi apparatus; trans-Golgi network; plasma membrane; integral component of membrane	PF03105 PF03124	SPX; EXS;	AT3G23430|PHO1|ATPHO1|phosphate 1|ARABIDOPSIS PHOSPHATE 1|MLM24.26
Glyma.02g004100	176	UniRef100_K7K5S3 Ribosomal_L14e domain-containing protein n=2 Tax=Soja TaxID=1462606 RepID=K7K5S3_SOYBN	1e-122	99.43	UniRef100_K7K5S3 Ribosomal_L14e domain-containing protein n=2 Tax=Soja TaxID=1462606 RepID=K7K5S3_SOYBN	1e-122	99.43	AT4G27090.1 | Symbols: | Ribosomal protein L14 | chr4:13594104-13595187 REVERSE LENGTH=134	5e-76	75.57	GO:0006412 GO:0042273	translation; ribosomal large subunit biogenesis;	GO:0003723 GO:0003729	RNA binding; mRNA binding;	GO:0005730 GO:0005737 GO:0005773 GO:0005774 GO:0005783 GO:0005829 GO:0009506 GO:0022625 GO:0022626	nucleolus; cytoplasm; vacuole; vacuolar membrane; endoplasmic reticulum; cytosol; plasmodesma; cytosolic large ribosomal subunit; cytosolic ribosome	PF01929	Ribosomal_L14e;	AT4G27090|T24A18.40|T24A18_40
Glyma.02g004600	418	UniRef100_I1JB75 DUF4005 domain-containing protein n=1 Tax=Glycine max TaxID=3847 RepID=I1JB75_SOYBN	0	99.76	UniRef100_I1JB75 DUF4005 domain-containing protein n=1 Tax=Glycine max TaxID=3847 RepID=I1JB75_SOYBN	0	99.76	AT4G14750.1 | Symbols: IQD19 | IQ-domain 19 | chr4:8470449-8471903 FORWARD LENGTH=387	6e-90	98.56	NA	NA	NA	NA	GO:0005634	nucleus	PF00612 PF13178	IQ; DUF4005;	AT4G14750
Glyma.02g004800	214	UniRef100_I1JB77 Uncharacterized protein n=2 Tax=Soja TaxID=1462606 RepID=I1JB77_SOYBN	6e-153	99.53	UniRef100_UPI000F7C4F09 uncharacterized protein LOC113873324 n=1 Tax=Abrus precatorius TaxID=3816 RepID=UPI000F7C4F09	7e-114	98.6	AT4G14746.1 | Symbols: | CONTAINS InterPro DOMAIN/s: EGF-like (InterPro:IPR006210); Has 259 Blast hits to 234 proteins in 55 species: Archae - 0; Bacteria - 0; Metazoa - 184; Fungi - 0; Plants - 69; Viruses - 0; Other Eukaryotes - 6 (source: NCBI BLink). | chr4:8462720-8464326 REVERSE LENGTH=212	3e-62	96.26	GO:0008150	biological process;	NA	NA	GO:0031225	anchored component of membrane	NA	NA	AT4G14746
Glyma.02g005100	490	UniRef100_UPI0003DEC6BB VAN3-binding protein isoform X1 n=1 Tax=Glycine max TaxID=3847 RepID=UPI0003DEC6BB	0	99.8	UniRef100_UPI0003DEC6BB VAN3-binding protein isoform X1 n=1 Tax=Glycine max TaxID=3847 RepID=UPI0003DEC6BB	0	99.8	AT3G22810.1 | Symbols: | Plant protein of unknown function (DUF828) with plant pleckstrin homology-like region | chr3:8068595-8071559 FORWARD LENGTH=472	0	95.71	GO:0007165 GO:0009734 GO:0010087 GO:0010305	signal transduction; auxin-activated signaling pathway; phloem or xylem histogenesis; leaf vascular tissue pattern formation;	GO:0035091	phosphatidylinositol binding;	GO:0005634 GO:0005802 GO:0009507	nucleus; trans-Golgi network; chloroplast	PF08458 PF05703	PH_2; Auxin_canalis;	AT3G22810|FL2|FORKED-LIKE2|MWI23.18
Glyma.02g006000	320	UniRef100_I1JB89 Serine/threonine-protein phosphatase n=2 Tax=Soja TaxID=1462606 RepID=I1JB89_SOYBN	0	99.69	UniRef100_I1JB89 Serine/threonine-protein phosphatase n=2 Tax=Soja TaxID=1462606 RepID=I1JB89_SOYBN	0	99.69	AT2G39840.1 | Symbols: TOPP4 | type one serine/threonine protein phosphatase 4 | chr2:16627430-16628789 FORWARD LENGTH=321	0	95.94	GO:0006468 GO:0006470 GO:0009740 GO:0010161 GO:0016311 GO:0040008	protein phosphorylation; protein dephosphorylation; gibberellic acid mediated signaling pathway; red light signaling pathway; dephosphorylation; regulation of growth;	GO:0004722 GO:0005515 GO:0016791 GO:0046872	protein serine/threonine phosphatase activity; protein binding; phosphatase activity; metal ion binding;	GO:0000164 GO:0005634 GO:0005737	protein phosphatase type 1 complex; nucleus; cytoplasm	PF16891 PF00149	STPPase_N; Metallophos;	AT2G39840|TOPP4|type one serine/threonine protein phosphatase 4
Glyma.02g006100	131	UniRef100_I1JB90 Uncharacterized protein n=1 Tax=Glycine max TaxID=3847 RepID=I1JB90_SOYBN	5e-88	99.24	NA	NA	NA	NA	NA	NA	NA	NA	NA	NA	NA	NA	NA	NA	NA
Glyma.02g006500	619	UniRef100_K7K5T4 ABC1 domain-containing protein n=1 Tax=Glycine max TaxID=3847 RepID=K7K5T4_SOYBN	0	99.84	UniRef100_K7K5T4 ABC1 domain-containing protein n=1 Tax=Glycine max TaxID=3847 RepID=K7K5T4_SOYBN	0	99.84	AT4G01660.1 | Symbols: ATABC1, ATATH10, ABC1 | ABC transporter 1 | chr4:708652-711095 FORWARD LENGTH=623	0	99.84	GO:0006744 GO:0010224 GO:0015996 GO:0017004	ubiquinone biosynthetic process; response to UV-B; chlorophyll catabolic process; cytochrome complex assembly;	GO:0005215 GO:0005524 GO:0016301	transporter activity; ATP binding; kinase activity;	GO:0005739 GO:0005743 GO:0005746	mitochondrion; mitochondrial inner membrane; mitochondrial respirasome	PF03109	ABC1;	AT4G01660|ATABC1|ATATH10|ABC1|ABC transporter 1|T15B16.14|T15B16_14
Glyma.02g006700	112	UniRef100_A0A445LHW7 Uncharacterized protein n=3 Tax=Soja TaxID=1462606 RepID=A0A445LHW7_GLYSO	3e-64	88.39	UniRef100_A0A1S3TQH4 uncharacterized protein LOC106757748 n=1 Tax=Vigna radiata var. radiata TaxID=3916 RepID=A0A1S3TQH4_VIGRR	1e-31	88.39	AT4G01670.1 | Symbols: | unknown protein; BEST Arabidopsis thaliana protein match is: unknown protein (TAIR:AT3G62070.1); Has 141 Blast hits to 139 proteins in 15 species: Archae - 0; Bacteria - 0; Metazoa - 0; Fungi - 0; Plants - 138; Viruses - 0; Other Eukaryotes - 3 (source: NCBI BLink). | chr4:711464-712511 REVERSE LENGTH=249	2e-25	59.82	GO:0008150	biological process;	GO:0003674	molecular function;	GO:0005634	nucleus	NA	NA	AT4G01670|T15B16.23|T15B16_23
Glyma.02g006900	755	UniRef100_K7K5T7 Uncharacterized protein n=1 Tax=Glycine max TaxID=3847 RepID=K7K5T7_SOYBN	0	99.87	UniRef100_A0A445LHT8 Pentatricopeptide repeat-containing protein, chloroplastic n=1 Tax=Glycine soja TaxID=3848 RepID=A0A445LHT8_GLYSO	0	99.87	AT3G57430.1 | Symbols: OTP84 | Tetratricopeptide repeat (TPR)-like superfamily protein | chr3:21255731-21258403 REVERSE LENGTH=890	2e-149	90.2	GO:0006397 GO:0009451 GO:0031425	mRNA processing; RNA modification; chloroplast RNA processing;	GO:0008270	zinc ion binding;	GO:0009507 GO:0043231	chloroplast; intracellular membrane-bounded organelle	PF01535 PF13041	PPR; PPR_2;	AT3G57430|OTP84|ORGANELLE TRANSCRIPT PROCESSING 84|T8H10.30
Glyma.02g008900	332	UniRef100_UPI0003DE8076 peroxidase 5 isoform X1 n=1 Tax=Glycine max TaxID=3847 RepID=UPI0003DE8076	0	99.7	UniRef100_UPI0003DE8076 peroxidase 5 isoform X1 n=1 Tax=Glycine max TaxID=3847 RepID=UPI0003DE8076	0	99.7	AT3G21770.1 | Symbols: | Peroxidase superfamily protein | chr3:7673345-7674661 FORWARD LENGTH=329	1e-89	88.55	GO:0006950 GO:0006979 GO:0042744 GO:0055114	response to stress; response to oxidative stress; hydrogen peroxide catabolic process; oxidation-reduction process;	GO:0004601 GO:0016757 GO:0020037 GO:0046872	peroxidase activity; transferase activity, transferring glycosyl groups; heme binding; metal ion binding;	GO:0005576 GO:0005618 GO:0005634 GO:0005737 GO:0009505 GO:0009506	extracellular region; cell wall; nucleus; cytoplasm; plant-type cell wall; plasmodesma	PF00141	peroxidase;	AT3G21770|MSD21.10
Glyma.02g011200	477	UniRef100_A0A445LI16 Pentatricopeptide repeat-containing protein, mitochondrial n=4 Tax=Soja TaxID=1462606 RepID=A0A445LI16_GLYSO	0	99.79	UniRef100_A0A445LI16 Pentatricopeptide repeat-containing protein, mitochondrial n=4 Tax=Soja TaxID=1462606 RepID=A0A445LI16_GLYSO	0	99.79	AT1G02370.1 | Symbols: | Tetratricopeptide repeat (TPR)-like superfamily protein | chr1:474516-476383 FORWARD LENGTH=537	1e-140	93.29	GO:0008150	biological process;	GO:0003674	molecular function;	GO:0005739 GO:0009507	mitochondrion; chloroplast	PF13812 PF01535	PPR_3; PPR;	AT1G02370|T6A9.6|T6A9_6
Glyma.02g011900	288	UniRef100_I1JBF8 Uncharacterized protein n=3 Tax=Soja TaxID=1462606 RepID=I1JBF8_SOYBN	0	99.65	UniRef100_A0A1S3V3C9 uncharacterized protein LOC106771392 n=1 Tax=Vigna radiata var. radiata TaxID=3916 RepID=A0A1S3V3C9_VIGRR	8e-151	98.96	AT2G47360.1 | Symbols: | unknown protein; BEST Arabidopsis thaliana protein match is: unknown protein (TAIR:AT1G02570.1); Has 58 Blast hits to 55 proteins in 6 species: Archae - 0; Bacteria - 0; Metazoa - 0; Fungi - 0; Plants - 58; Viruses - 0; Other Eukaryotes - 0 (source: NCBI BLink). | chr2:19437820-19438731 FORWARD LENGTH=303	3e-54	75.69	GO:0008150	biological process;	GO:0003674	molecular function;	GO:0005739 GO:0016021	mitochondrion; integral component of membrane	NA	NA	AT2G47360|T8I13.20
Glyma.02g015300	358	UniRef100_A0A0R0KPZ7 Hexosyltransferase n=3 Tax=Soja TaxID=1462606 RepID=A0A0R0KPZ7_SOYBN	0	99.72	UniRef100_A0A0R0KPZ7 Hexosyltransferase n=3 Tax=Soja TaxID=1462606 RepID=A0A0R0KPZ7_SOYBN	0	99.72	AT3G62660.1 | Symbols: GATL7 | galacturonosyltransferase-like 7 | chr3:23173419-23174504 FORWARD LENGTH=361	0	99.16	GO:0045489 GO:0071555	pectin biosynthetic process; cell wall organization;	GO:0016757 GO:0047262	transferase activity, transferring glycosyl groups; polygalacturonate 4-alpha-galacturonosyltransferase activity;	GO:0000139 GO:0005794 GO:0009507 GO:0016021	Golgi membrane; Golgi apparatus; chloroplast; integral component of membrane	PF01501	Glyco_transf_8;	AT3G62660|GATL7|galacturonosyltransferase-like 7|F26K9.90
Glyma.02g015700	496	UniRef100_A0A0B2PLS9 Fumarate hydratase 1, mitochondrial n=2 Tax=Soja TaxID=1462606 RepID=A0A0B2PLS9_GLYSO	0	99.8	UniRef100_A0A0B2PLS9 Fumarate hydratase 1, mitochondrial n=2 Tax=Soja TaxID=1462606 RepID=A0A0B2PLS9_GLYSO	0	99.8	AT2G47510.1 | Symbols: FUM1 | fumarase 1 | chr2:19498614-19502020 FORWARD LENGTH=492	0	99.8	GO:0006099 GO:0006106 GO:0006108 GO:0006979 GO:0048868 GO:0051262	tricarboxylic acid cycle; fumarate metabolic process; malate metabolic process; response to oxidative stress; pollen tube development; protein tetramerization;	GO:0004333 GO:0005515	fumarate hydratase activity; protein binding;	GO:0005739 GO:0005829 GO:0045239	mitochondrion; cytosol; tricarboxylic acid cycle enzyme complex	PF10415 PF00206	FumaraseC_C; Lyase_1;	AT2G47510|FUM1|fumarase 1|T30B22.19
Glyma.02g016500	563	UniRef100_K7K5X8 Pectinesterase n=3 Tax=Soja TaxID=1462606 RepID=K7K5X8_SOYBN	0	99.82	UniRef100_K7K5X8 Pectinesterase n=3 Tax=Soja TaxID=1462606 RepID=K7K5X8_SOYBN	0	99.82	AT4G02320.1 | Symbols: | Plant invertase/pectin methylesterase inhibitor superfamily | chr4:1022725-1026118 REVERSE LENGTH=518	0	85.61	GO:0042545 GO:0045490	cell wall modification; pectin catabolic process;	GO:0030599 GO:0045330 GO:0046910	pectinesterase activity; aspartyl esterase activity; pectinesterase inhibitor activity;	GO:0005576 GO:0005618	extracellular region; cell wall	PF04043 PF01095	PMEI; Pectinesterase;	AT4G02320|T14P8.1|T14P8_1
Glyma.02g016600	554	UniRef100_I1JBK1 Pectinesterase n=2 Tax=Soja TaxID=1462606 RepID=I1JBK1_SOYBN	0	99.82	UniRef100_I1JBK1 Pectinesterase n=2 Tax=Soja TaxID=1462606 RepID=I1JBK1_SOYBN	0	99.82	AT4G02330.1 | Symbols: ATPMEPCRB | Plant invertase/pectin methylesterase inhibitor superfamily | chr4:1032479-1034928 FORWARD LENGTH=573	0	99.82	GO:0009409 GO:0009620 GO:0009741 GO:0042545 GO:0045490	response to cold; response to fungus; response to brassinosteroid; cell wall modification; pectin catabolic process;	GO:0030599 GO:0045330 GO:0046910	pectinesterase activity; aspartyl esterase activity; pectinesterase inhibitor activity;	GO:0005576 GO:0005618	extracellular region; cell wall	PF04043 PF01095	PMEI; Pectinesterase;	AT4G02330|ATPMEPCRB|PME41|AtPME41|pectin methylesterase 41|T14P8.14|T14P8_14
Glyma.02g016800	250	UniRef100_K7K5Y0 RING-type domain-containing protein n=3 Tax=Soja TaxID=1462606 RepID=K7K5Y0_SOYBN	5e-142	77.6	UniRef100_K7K5Y0 RING-type domain-containing protein n=3 Tax=Soja TaxID=1462606 RepID=K7K5Y0_SOYBN	5e-142	77.6	AT3G16720.1 | Symbols: ATL2, TL2 | TOXICOS EN LEVADURA 2 | chr3:5692880-5693794 FORWARD LENGTH=304	8e-33	52.4	GO:0006952 GO:0010200 GO:0016567	defense response; response to chitin; protein ubiquitination;	GO:0016740 GO:0046872	transferase activity; metal ion binding;	GO:0005634 GO:0016021	nucleus; integral component of membrane	PF13639	zf-RING_2;	AT3G16720|ATL2|TL2|TOXICOS EN LEVADURA 2|MGL6.26
Glyma.02g017400	734	UniRef100_I1JBK8 Gamma-tubulin complex component n=4 Tax=Soja TaxID=1462606 RepID=I1JBK8_SOYBN	0	99.86	UniRef100_I1JBK8 Gamma-tubulin complex component n=4 Tax=Soja TaxID=1462606 RepID=I1JBK8_SOYBN	0	99.86	AT3G53760.1 | Symbols: GCP4, ATGCP4 | GAMMA-TUBULIN COMPLEX PROTEIN 4 | chr3:19918182-19922264 REVERSE LENGTH=745	0	98.23	GO:0000278 GO:0007020 GO:0009624 GO:0031122 GO:0043622 GO:0051225 GO:0051321 GO:0051415	mitotic cell cycle; microtubule nucleation; response to nematode; cytoplasmic microtubule organization; cortical microtubule organization; spindle assembly; meiotic cell cycle; microtubule nucleation by interphase microtubule organizing center;	GO:0005515 GO:0043015 GO:0051011	protein binding; gamma-tubulin binding; microtubule minus-end binding;	GO:0000922 GO:0000923 GO:0000930 GO:0005737 GO:0005739 GO:0005813 GO:0005819 GO:0005874 GO:0009506 GO:0045298	spindle pole; equatorial microtubule organizing center; gamma-tubulin complex; cytoplasm; mitochondrion; centrosome; spindle; microtubule; plasmodesma; tubulin complex	PF04130	GCP_C_terminal;	AT3G53760|GCP4|ATGCP4|GAMMA-TUBULIN COMPLEX PROTEIN 4|F5K20.60
Glyma.02g022100	515	UniRef100_A0A445LIP5 Aldehyde oxidase GLOX n=2 Tax=Soja TaxID=1462606 RepID=A0A445LIP5_GLYSO	0	99.81	UniRef100_A0A445LIP5 Aldehyde oxidase GLOX n=2 Tax=Soja TaxID=1462606 RepID=A0A445LIP5_GLYSO	0	99.81	AT1G14430.1 | Symbols: | glyoxal oxidase-related protein | chr1:4934359-4936053 FORWARD LENGTH=564	0	99.61	GO:0008150	biological process;	GO:0003674	molecular function;	GO:0005576 GO:0016021	extracellular region; integral component of membrane	PF09118 PF07250	DUF1929; Glyoxal_oxid_N;	AT1G14430|F14L17.20|F14L17_20
Glyma.02g022200	581	UniRef100_A0A0B2R3J9 Nitrate transporter 1.2 n=2 Tax=Soja TaxID=1462606 RepID=A0A0B2R3J9_GLYSO	0	99.83	UniRef100_A0A0B2R3J9 Nitrate transporter 1.2 n=2 Tax=Soja TaxID=1462606 RepID=A0A0B2R3J9_GLYSO	0	99.83	AT1G69850.1 | Symbols: ATNRT1:2, NTL1, NRT1:2 | nitrate transporter 1:2 | chr1:26296945-26300407 REVERSE LENGTH=585	0	99.48	GO:0009624 GO:0010119 GO:0042128 GO:0080168	response to nematode; regulation of stomatal movement; nitrate assimilation; abscisic acid transport;	GO:0015333 GO:0035673 GO:0090440 GO:1904680	peptide:proton symporter activity; oligopeptide transmembrane transporter activity; abscisic acid transmembrane transporter activity; peptide transmembrane transporter activity;	GO:0005634 GO:0005886 GO:0016021	nucleus; plasma membrane; integral component of membrane	PF00854	PTR2;	AT1G69850|ATNRT1:2|NTL1|NRT1:2|AIT1|NRT1.2|NPF4.6|AtNPF4.6|nitrate transporter 1:2|ABA-importing transporter 1|NRT1/ PTR family 4.6|T17F3.12|T17F3_12
Glyma.02g023700	264	UniRef100_K7K612 TIR domain-containing protein n=2 Tax=Soja TaxID=1462606 RepID=K7K612_SOYBN	0	99.62	UniRef100_K7K612 TIR domain-containing protein n=2 Tax=Soja TaxID=1462606 RepID=K7K612_SOYBN	0	99.62	AT5G36930.2 | Symbols: | Disease resistance protein (TIR-NBS-LRR class) family | chr5:14567771-14571916 REVERSE LENGTH=1191	2e-41	62.88	GO:0007165	signal transduction;	GO:0043531	ADP binding;	GO:0005737 GO:0016021	cytoplasm; integral component of membrane	PF13676	TIR_2;	AT5G36930|MLF18.50|MLF18_50
Glyma.02g024400	616	UniRef100_K7K619 Protein kinase domain-containing protein n=2 Tax=Soja TaxID=1462606 RepID=K7K619_SOYBN	0	99.84	UniRef100_K7K619 Protein kinase domain-containing protein n=2 Tax=Soja TaxID=1462606 RepID=K7K619_SOYBN	0	99.84	AT1G69910.1 | Symbols: | Protein kinase superfamily protein | chr1:26330166-26332076 FORWARD LENGTH=636	0	98.54	GO:0006468 GO:0007166 GO:0016310	protein phosphorylation; cell surface receptor signaling pathway; phosphorylation;	GO:0004674 GO:0016301	protein serine/threonine kinase activity; kinase activity;	GO:0005886	plasma membrane	PF00069	Pkinase;	AT1G69910|T17F3.6|T17F3_6
Glyma.02g026500	606	UniRef100_I1JBV1 Glycosyltransferase family 92 protein n=2 Tax=Soja TaxID=1462606 RepID=I1JBV1_SOYBN	0	99.83	UniRef100_I1JBV1 Glycosyltransferase family 92 protein n=2 Tax=Soja TaxID=1462606 RepID=I1JBV1_SOYBN	0	99.83	AT1G27200.1 | Symbols: | Domain of unknown function (DUF23) | chr1:9449812-9451539 REVERSE LENGTH=575	0	91.25	GO:0008150	biological process;	NA	NA	GO:0000138 GO:0005634 GO:0005794	Golgi trans cisterna; nucleus; Golgi apparatus	PF13704	Glyco_tranf_2_4;	AT1G27200|T7N9.26|T7N9_26
Glyma.02g026800	397	UniRef100_I1JBV5 Pyruvate dehydrogenase E1 component subunit alpha n=2 Tax=Soja TaxID=1462606 RepID=I1JBV5_SOYBN	0	99.75	UniRef100_I1JBV5 Pyruvate dehydrogenase E1 component subunit alpha n=2 Tax=Soja TaxID=1462606 RepID=I1JBV5_SOYBN	0	99.75	AT1G59900.1 | Symbols: AT-E1 ALPHA, E1 ALPHA | pyruvate dehydrogenase complex E1 alpha subunit | chr1:22051368-22053660 FORWARD LENGTH=389	0	99.75	GO:0006086 GO:0006096 GO:0046686 GO:0055114	acetyl-CoA biosynthetic process from pyruvate; glycolytic process; response to cadmium ion; oxidation-reduction process;	GO:0004739	pyruvate dehydrogenase (acetyl-transferring) activity;	GO:0005634 GO:0005739 GO:0005829 GO:0005967 GO:0009507	nucleus; mitochondrion; cytosol; mitochondrial pyruvate dehydrogenase complex; chloroplast	PF00676	E1_dh;	AT1G59900|AT-E1 ALPHA|E1 ALPHA|IAR4L|pyruvate dehydrogenase complex E1 alpha subunit|IAR4-LIKE|PYRUVATE DEHYDROGENASE E1 ALPHA SUBUNIT
Glyma.02g027000	221	UniRef100_A0A0B2R4X1 Germin-like protein n=2 Tax=Soja TaxID=1462606 RepID=A0A0B2R4X1_GLYSO	2e-157	99.55	UniRef100_A0A0B2R4X1 Germin-like protein n=2 Tax=Soja TaxID=1462606 RepID=A0A0B2R4X1_GLYSO	2e-157	99.55	AT1G10460.1 | Symbols: GLP7 | germin-like protein 7 | chr1:3439578-3440231 REVERSE LENGTH=217	8e-83	90.95	GO:0006950	response to stress;	GO:0030145 GO:0045735	manganese ion binding; nutrient reservoir activity;	GO:0005576 GO:0005618 GO:0048046	extracellular region; cell wall; apoplast	PF07883	Cupin_2;	AT1G10460|GLP7|germin-like protein 7|T10O24.6
Glyma.02g027800	380	UniRef100_K7K640 ZnMc domain-containing protein n=2 Tax=Soja TaxID=1462606 RepID=K7K640_SOYBN	0	99.74	UniRef100_K7K640 ZnMc domain-containing protein n=2 Tax=Soja TaxID=1462606 RepID=K7K640_SOYBN	0	99.74	AT1G24140.1 | Symbols: | Matrixin family protein | chr1:8536131-8537285 REVERSE LENGTH=384	6e-134	95.26	GO:0006508 GO:0030198 GO:0030574	proteolysis; extracellular matrix organization; collagen catabolic process;	GO:0004222 GO:0008270	metalloendopeptidase activity; zinc ion binding;	GO:0005576 GO:0005886 GO:0031012 GO:0031225	extracellular region; plasma membrane; extracellular matrix; anchored component of membrane	PF01471 PF00413	PG_binding_1; Peptidase_M10;	AT1G24140|AT3-MMP|F3I6.6|F3I6_6
Glyma.02g030000	760	UniRef100_A0A0R0KWB5 NB-ARC domain-containing protein n=1 Tax=Glycine max TaxID=3847 RepID=A0A0R0KWB5_SOYBN	0	99.87	UniRef100_A0A0R0KWB5 NB-ARC domain-containing protein n=1 Tax=Glycine max TaxID=3847 RepID=A0A0R0KWB5_SOYBN	0	99.87	AT3G14470.1 | Symbols: | NB-ARC domain-containing disease resistance protein | chr3:4857940-4861104 FORWARD LENGTH=1054	6e-44	42.11	GO:0006952	defense response;	GO:0005515 GO:0005524 GO:0043531	protein binding; ATP binding; ADP binding;	GO:0005576	extracellular region	PF00931	NB-ARC;	AT3G14470|MOA2.9
Glyma.02g032100	303	UniRef100_A0A0R0KY63 N-acetyltransferase domain-containing protein n=3 Tax=Soja TaxID=1462606 RepID=A0A0R0KY63_SOYBN	0	99.67	UniRef100_A0A0R0KY63 N-acetyltransferase domain-containing protein n=3 Tax=Soja TaxID=1462606 RepID=A0A0R0KY63_SOYBN	0	99.67	AT1G24040.1 | Symbols: | Acyl-CoA N-acyltransferases (NAT) superfamily protein | chr1:8505794-8506753 REVERSE LENGTH=319	9e-102	84.16	NA	NA	GO:0005515 GO:0008080	protein binding; N-acetyltransferase activity;	GO:0009507	chloroplast	PF00583	Acetyltransf_1;	AT1G24040
Glyma.02g033400	510	UniRef100_I1JC13 Uncharacterized protein n=1 Tax=Glycine max TaxID=3847 RepID=I1JC13_SOYBN	0	99.8	UniRef100_A0A1S3VZ43 uncharacterized protein LOC106779675 n=1 Tax=Vigna radiata var. radiata TaxID=3916 RepID=A0A1S3VZ43_VIGRR	0	99.8	AT1G70280.2 | Symbols: | NHL domain-containing protein | chr1:26466086-26468471 REVERSE LENGTH=509	0	90.98	GO:0008150	biological process;	GO:0003674	molecular function;	GO:0005576 GO:0005634 GO:0016021	extracellular region; nucleus; integral component of membrane	NA	NA	AT1G70280|F17O7.19|F17O7_19
Glyma.03g022100	773	UniRef100_A0A445L6K4 Pentatricopeptide repeat-containing protein, mitochondrial isoform C n=3 Tax=Soja TaxID=1462606 RepID=A0A445L6K4_GLYSO	0	99.87	UniRef100_A0A445L6K4 Pentatricopeptide repeat-containing protein, mitochondrial isoform C n=3 Tax=Soja TaxID=1462606 RepID=A0A445L6K4_GLYSO	0	99.87	AT4G32430.1 | Symbols: | Pentatricopeptide repeat (PPR) superfamily protein | chr4:15652982-15655273 FORWARD LENGTH=763	0	95.73	GO:0009451 GO:1905639	RNA modification; positive regulation of mitochondrial mRNA catabolic process;	NA	NA	GO:0005739 GO:0043231	mitochondrion; intracellular membrane-bounded organelle	PF01535 PF13041	PPR; PPR_2;	AT4G32430|GRS1|Growing slowly 1|F8B4.130|F8B4_130
Glyma.03g058000	272	UniRef100_A0A0R0KMM3 SGNH_hydro domain-containing protein n=1 Tax=Glycine max TaxID=3847 RepID=A0A0R0KMM3_SOYBN	0	99.63	UniRef100_A0A0R0KMM3 SGNH_hydro domain-containing protein n=1 Tax=Glycine max TaxID=3847 RepID=A0A0R0KMM3_SOYBN	0	99.63	AT3G11210.1 | Symbols: | SGNH hydrolase-type esterase superfamily protein | chr3:3511101-3512899 REVERSE LENGTH=256	9e-121	91.18	GO:0016042	lipid catabolic process;	GO:0016787	hydrolase activity;	GO:0005576 GO:0005737	extracellular region; cytoplasm	PF00657	Lipase_GDSL;	AT3G11210|F11B9.13
Glyma.03g063900	507	UniRef100_A0A0B2SQV3 Auxin transporter-like protein 4 n=2 Tax=Soja TaxID=1462606 RepID=A0A0B2SQV3_GLYSO	0	99.8	UniRef100_A0A0B2SQV3 Auxin transporter-like protein 4 n=2 Tax=Soja TaxID=1462606 RepID=A0A0B2SQV3_GLYSO	0	99.8	AT2G38120.1 | Symbols: AUX1, WAV5, PIR1, MAP1 | Transmembrane amino acid transporter family protein | chr2:15973493-15976792 FORWARD LENGTH=485	0	94.67	GO:0001736 GO:0003333 GO:0009624 GO:0009723 GO:0009733 GO:0009734 GO:0009926 GO:0009958 GO:0010311 GO:0048765 GO:0048829	establishment of planar polarity; amino acid transmembrane transport; response to nematode; response to ethylene; response to auxin; auxin-activated signaling pathway; auxin polar transport; positive gravitropism; lateral root formation; root hair cell differentiation; root cap development;	GO:0010011 GO:0010328 GO:0015171 GO:0015293	auxin binding; auxin influx transmembrane transporter activity; amino acid transmembrane transporter activity; symporter activity;	GO:0005768 GO:0005794 GO:0005886 GO:0009986 GO:0016021	endosome; Golgi apparatus; plasma membrane; cell surface; integral component of membrane	PF01490	Aa_trans;	AT2G38120|AUX1|WAV5|PIR1|MAP1|AtAUX1|AUXIN RESISTANT 1|WAVY ROOTS 5|MODIFIER OF ARF7/NPH4 PHENOTYPES 1|F16M14.5|F16M14_5
Glyma.03g245200	406	UniRef100_I1JRL2 Uncharacterized protein n=2 Tax=Soja TaxID=1462606 RepID=I1JRL2_SOYBN	0	99.75	UniRef100_G7L0U1 DUF573 family protein n=1 Tax=Medicago truncatula TaxID=3880 RepID=G7L0U1_MEDTR	2e-150	99.01	AT5G28040.1 | Symbols: | DNA-binding storekeeper protein-related transcriptional regulator | chr5:10037654-10038937 REVERSE LENGTH=427	2e-95	99.51	GO:0006355 GO:0042742	regulation of transcription, DNA-templated; defense response to bacterium;	GO:0005515 GO:0043565 GO:0044212	protein binding; sequence-specific DNA binding; transcription regulatory region DNA binding;	GO:0005634 GO:0005737	nucleus; cytoplasm	PF04504	DUF573;	AT5G28040|VFP4|VIRF INTERACTING PROTEIN 4|F15F15.110|F15F15_110
Glyma.04g059600	155	UniRef100_K7KIC7 PEROXIDASE_4 domain-containing protein n=1 Tax=Glycine max TaxID=3847 RepID=K7KIC7_SOYBN	6e-112	99.35	UniRef100_K7KIC7 PEROXIDASE_4 domain-containing protein n=1 Tax=Glycine max TaxID=3847 RepID=K7KIC7_SOYBN	6e-112	99.35	AT4G31760.1 | Symbols: | Peroxidase superfamily protein | chr4:15368032-15369724 REVERSE LENGTH=354	1e-46	90.32	GO:0006950 GO:0006979 GO:0042744 GO:0055114	response to stress; response to oxidative stress; hydrogen peroxide catabolic process; oxidation-reduction process;	GO:0004601 GO:0020037 GO:0046872	peroxidase activity; heme binding; metal ion binding;	GO:0005576 GO:0009505 GO:0009506	extracellular region; plant-type cell wall; plasmodesma	PF00141	peroxidase;	AT4G31760|F28M20.50|F28M20_50
Glyma.05g031000	1626	UniRef100_A0A445KIK5 Inactive ubiquitin carboxyl-terminal hydrolase 54 isoform A n=1 Tax=Glycine soja TaxID=3848 RepID=A0A445KIK5_GLYSO	0	99.94	UniRef100_A0A445KIK5 Inactive ubiquitin carboxyl-terminal hydrolase 54 isoform A n=1 Tax=Glycine soja TaxID=3848 RepID=A0A445KIK5_GLYSO	0	99.94	AT3G47890.1 | Symbols: | Ubiquitin carboxyl-terminal hydrolase-related protein | chr3:17667172-17673530 REVERSE LENGTH=1568	0	96.43	NA	NA	NA	NA	GO:0005737	cytoplasm	PF00443 PF04781 PF04780	UCH; DUF627; DUF629;	AT3G47890
Glyma.06g085700	195	UniRef100_C9WA59 AP2 domain-containing transcription factor 1 n=2 Tax=Soja TaxID=1462606 RepID=C9WA59_SOYBN	3e-139	99.49	UniRef100_C9WA59 AP2 domain-containing transcription factor 1 n=2 Tax=Soja TaxID=1462606 RepID=C9WA59_SOYBN	3e-139	99.49	AT5G11590.1 | Symbols: TINY2 | Integrase-type DNA-binding superfamily protein | chr5:3727789-3728499 REVERSE LENGTH=236	5e-70	96.92	GO:0009873 GO:0045893	ethylene-activated signaling pathway; positive regulation of transcription, DNA-templated;	GO:0003700 GO:0043565	DNA-binding transcription factor activity; sequence-specific DNA binding;	GO:0005634	nucleus	PF00847	AP2;	AT5G11590|TINY2|TINY2|T22P22.1
Glyma.06g099400	360	UniRef100_A0A445K7F4 Purine permease 1 n=1 Tax=Glycine soja TaxID=3848 RepID=A0A445K7F4_GLYSO	0	99.72	UniRef100_A0A445K7F4 Purine permease 1 n=1 Tax=Glycine soja TaxID=3848 RepID=A0A445K7F4_GLYSO	0	99.72	AT1G28230.1 | Symbols: PUP1, ATPUP1 | purine permease 1 | chr1:9862200-9864554 REVERSE LENGTH=356	1e-145	94.44	GO:0006863 GO:0010184	purine nucleobase transport; cytokinin transport;	GO:0005345 GO:0015211	purine nucleobase transmembrane transporter activity; purine nucleoside transmembrane transporter activity;	GO:0005887 GO:0009507	integral component of plasma membrane; chloroplast	PF16913	PUNUT;	AT1G28230|PUP1|ATPUP1|purine permease 1|F3H9.22|F3H9_22|PURINE PERMEASE 1
Glyma.07g196000	249	UniRef100_I1KLJ3 RING-type domain-containing protein n=2 Tax=Soja TaxID=1462606 RepID=I1KLJ3_SOYBN	0	99.6	UniRef100_I1KLJ3 RING-type domain-containing protein n=2 Tax=Soja TaxID=1462606 RepID=I1KLJ3_SOYBN	0	99.6	AT4G03510.1 | Symbols: RMA1, ATRMA1 | RING membrane-anchor 1 | chr4:1557905-1558654 REVERSE LENGTH=249	1e-51	93.57	GO:0006511 GO:0016567 GO:0032527 GO:0032940 GO:0071712	ubiquitin-dependent protein catabolic process; protein ubiquitination; protein exit from endoplasmic reticulum; secretion by cell; ER-associated misfolded protein catabolic process;	GO:0004842 GO:0044390 GO:0046872 GO:0061630	ubiquitin-protein transferase activity; ubiquitin-like protein conjugating enzyme binding; metal ion binding; ubiquitin protein ligase activity;	GO:0005634 GO:0005783 GO:0005789 GO:0016020 GO:0016021	nucleus; endoplasmic reticulum; endoplasmic reticulum membrane; membrane; integral component of membrane	PF00097	zf-C3HC4;	AT4G03510|RMA1|ATRMA1|RING membrane-anchor 1|F9H3.14|F9H3_14
Glyma.09g070300	510	UniRef100_I1L1Q8 Aldedh domain-containing protein n=2 Tax=Soja TaxID=1462606 RepID=I1L1Q8_SOYBN	0	99.8	UniRef100_I1L1Q8 Aldedh domain-containing protein n=2 Tax=Soja TaxID=1462606 RepID=I1L1Q8_SOYBN	0	99.8	AT1G54100.1 | Symbols: ALDH7B4 | aldehyde dehydrogenase 7B4 | chr1:20195435-20198853 REVERSE LENGTH=508	0	99.8	GO:0009269 GO:0009651 GO:0009737 GO:0055114	response to desiccation; response to salt stress; response to abscisic acid; oxidation-reduction process;	GO:0043878	glyceraldehyde-3-phosphate dehydrogenase (NAD+) (non-phosphorylating) activity;	GO:0005829 GO:0009507	cytosol; chloroplast	PF00171	Aldedh;	AT1G54100|ALDH7B4|aldehyde dehydrogenase 7B4|F15I1.19|F15I1_19
Glyma.09g084700	595	UniRef100_I1L225 AA_permease_C domain-containing protein n=2 Tax=Soja TaxID=1462606 RepID=I1L225_SOYBN	0	99.83	UniRef100_I1L225 AA_permease_C domain-containing protein n=2 Tax=Soja TaxID=1462606 RepID=I1L225_SOYBN	0	99.83	AT4G21120.1 | Symbols: AAT1, CAT1 | amino acid transporter 1 | chr4:11270318-11273775 FORWARD LENGTH=594	0	96.64	GO:0015802 GO:0051938	basic amino acid transport; L-glutamate import;	GO:0005313 GO:0015174 GO:0015181 GO:0015189	L-glutamate transmembrane transporter activity; basic amino acid transmembrane transporter activity; arginine transmembrane transporter activity; L-lysine transmembrane transporter activity;	GO:0005737 GO:0005886 GO:0016020 GO:0016021	cytoplasm; plasma membrane; membrane; integral component of membrane	PF13906 PF13520	AA_permease_C; AA_permease_2;	AT4G21120|AAT1|CAT1|AtCAT1|amino acid transporter 1|CATIONIC AMINO ACID TRANSPORTER 1|F7J7.60|F7J7_60
Glyma.09g229800	474	UniRef100_I1L5N9 Uncharacterized protein n=1 Tax=Glycine max TaxID=3847 RepID=I1L5N9_SOYBN	0	99.79	UniRef100_A0A445J4W8 F-box protein n=1 Tax=Glycine soja TaxID=3848 RepID=A0A445J4W8_GLYSO	0	99.79	AT5G07670.1 | Symbols: | RNI-like superfamily protein | chr5:2430421-2432065 FORWARD LENGTH=476	0	99.58	GO:0006511 GO:0031146	ubiquitin-dependent protein catabolic process; SCF-dependent proteasomal ubiquitin-dependent protein catabolic process;	GO:0004842	ubiquitin-protein transferase activity;	GO:0019005	SCF ubiquitin ligase complex	NA	NA	AT5G07670|MBK20.11|MBK20_11
Glyma.10g010501	144	UniRef100_A0A445IGC9 Putative pectinesterase 53 (Fragment) n=1 Tax=Glycine soja TaxID=3848 RepID=A0A445IGC9_GLYSO	1e-101	99.31	UniRef100_A0A0R0HMQ9 Pectinesterase domain-containing protein n=1 Tax=Glycine max TaxID=3847 RepID=A0A0R0HMQ9_SOYBN	2e-85	90.28	AT5G19730.1 | Symbols: | Pectin lyase-like superfamily protein | chr5:6670562-6673202 FORWARD LENGTH=383	2e-50	89.58	GO:0042545 GO:0045490	cell wall modification; pectin catabolic process;	GO:0030599 GO:0045330 GO:0052689	pectinesterase activity; aspartyl esterase activity; carboxylic ester hydrolase activity;	GO:0005576 GO:0005618 GO:0005737 GO:0009507	extracellular region; cell wall; cytoplasm; chloroplast	PF01095	Pectinesterase;	AT5G19730|T29J13.150|T29J13_150
Glyma.11g021000	375	UniRef100_K7LMM2 Uncharacterized protein n=2 Tax=Soja TaxID=1462606 RepID=K7LMM2_SOYBN	0	99.73	UniRef100_UPI00098D7A6B protein SGT1 homolog A n=1 Tax=Cajanus cajan TaxID=3821 RepID=UPI00098D7A6B	0	99.47	AT4G11260.1 | Symbols: ATSGT1B, ETA3, RPR1, EDM1, SGT1B | phosphatase-related | chr4:6851515-6853719 REVERSE LENGTH=358	2e-148	99.73	GO:0006511 GO:0009408 GO:0009734 GO:0009793 GO:0009867 GO:0010187 GO:0030163 GO:0031647 GO:0045087 GO:0050821 GO:0050832 GO:2000072	ubiquitin-dependent protein catabolic process; response to heat; auxin-activated signaling pathway; embryo development ending in seed dormancy; jasmonic acid mediated signaling pathway; negative regulation of seed germination; protein catabolic process; regulation of protein stability; innate immune response; protein stabilization; defense response to fungus; regulation of defense response to fun…	GO:0005515	protein binding;	GO:0005634 GO:0005737 GO:0005829 GO:0019005	nucleus; cytoplasm; cytosol; SCF ubiquitin ligase complex	PF13414 PF04969 PF05002	TPR_11; CS; SGS;	AT4G11260|ATSGT1B|ETA3|RPR1|EDM1|SGT1B|ENHANCER OF TIR1-1 AUXIN RESISTANCE 3|ENHANCED DOWNY MILDEW 1|F8L21.50|F8L21_50
Glyma.11g022900	845	UniRef100_A0A445HVZ6 Mitogen-activated protein kinase kinase kinase YODA isoform A n=3 Tax=Soja TaxID=1462606 RepID=A0A445HVZ6_GLYSO	0	99.88	UniRef100_A0A445HVZ6 Mitogen-activated protein kinase kinase kinase YODA isoform A n=3 Tax=Soja TaxID=1462606 RepID=A0A445HVZ6_GLYSO	0	99.88	AT1G63700.1 | Symbols: EMB71, YDA, MAPKKK4 | Protein kinase superfamily protein | chr1:23625208-23629031 REVERSE LENGTH=883	0	99.05	GO:0007346 GO:0009793 GO:0010098 GO:0010103 GO:0010229 GO:0023014 GO:0031098 GO:0032147 GO:0040008	regulation of mitotic cell cycle; embryo development ending in seed dormancy; suspensor development; stomatal complex morphogenesis; inflorescence development; signal transduction by protein phosphorylation; stress-activated protein kinase signaling cascade; activation of protein kinase activity; regulation of growth;	GO:0004674 GO:0004709 GO:0005515 GO:0005524	protein serine/threonine kinase activity; MAP kinase kinase kinase activity; protein binding; ATP binding;	GO:0005737 GO:0005886 GO:0005938	cytoplasm; plasma membrane; cell cortex	PF14531	Kinase-like;	AT1G63700|EMB71|YDA|MAPKKK4|EMBRYO DEFECTIVE 71|YODA|MAP KINASE KINASE KINASE 4|F24D7.11|F24D7_11
Glyma.11g033200	355	UniRef100_A0A445HWC7 WAT1-related protein n=3 Tax=Soja TaxID=1462606 RepID=A0A445HWC7_GLYSO	0	99.72	UniRef100_A0A4Y1RFT0 Nodulin MtN21 /EamA-like transporter family protein (Fragment) n=1 Tax=Prunus dulcis TaxID=3755 RepID=A0A4Y1RFT0_PRUDU	2e-145	99.15	AT5G47470.1 | Symbols: | Nodulin MtN21 /EamA-like transporter family protein | chr5:19254598-19256378 FORWARD LENGTH=364	2e-132	99.72	NA	NA	GO:0022857	transmembrane transporter activity;	GO:0005886 GO:0016021	plasma membrane; integral component of membrane	PF00892	EamA;	AT5G47470
Glyma.11g038500	988	UniRef100_K7LMX5 ERCC4 domain-containing protein n=1 Tax=Glycine max TaxID=3847 RepID=K7LMX5_SOYBN	0	99.9	UniRef100_K7LMX5 ERCC4 domain-containing protein n=1 Tax=Glycine max TaxID=3847 RepID=K7LMX5_SOYBN	0	99.9	AT5G41150.1 | Symbols: UVH1, ATRAD1, RAD1 | Restriction endonuclease, type II-like superfamily protein | chr5:16473044-16476919 REVERSE LENGTH=956	0	99.8	GO:0000712 GO:0000720 GO:0000724 GO:0006281 GO:0006289 GO:0006296 GO:0006979 GO:0009314 GO:1901255	resolution of meiotic recombination intermediates; pyrimidine dimer repair by nucleotide-excision repair; double-strand break repair via homologous recombination; DNA repair; nucleotide-excision repair; nucleotide-excision repair, DNA incision, 5'-to lesion; response to oxidative stress; response to radiation; nucleotide-excision repair involved in interstrand cross-link repair;	GO:0000014 GO:0003684 GO:0003697	single-stranded DNA endodeoxyribonuclease activity; damaged DNA binding; single-stranded DNA binding;	GO:0000110 GO:0005634	nucleotide-excision repair factor 1 complex; nucleus	PF02732	ERCC4;	AT5G41150|UVH1|ATRAD1|RAD1|ULTRAVIOLET HYPERSENSITIVE 1|MEE6.22|MEE6_22|repair endonuclease
Glyma.11g070900	271	UniRef100_I1LHV3 Uncharacterized protein n=2 Tax=Soja TaxID=1462606 RepID=I1LHV3_SOYBN	0	99.63	UniRef100_A0A4D6LRC1 Trimeric LpxA-like n=1 Tax=Vigna unguiculata TaxID=3917 RepID=A0A4D6LRC1_VIGUN	0	99.63	AT1G19580.1 | Symbols: GAMMA CA1 | gamma carbonic anhydrase 1 | chr1:6774937-6777092 FORWARD LENGTH=275	4e-155	99.26	GO:0009853	photorespiration;	GO:0004089 GO:0046872	carbonate dehydratase activity; metal ion binding;	GO:0005634 GO:0005737 GO:0005739 GO:0005747 GO:0031966 GO:0045271	nucleus; cytoplasm; mitochondrion; mitochondrial respiratory chain complex I; mitochondrial membrane; respiratory chain complex I	PF00132	Hexapep;	AT1G19580|GAMMA CA1|gamma carbonic anhydrase 1
Glyma.11g074900	194	UniRef100_I1LHZ2 Uncharacterized protein n=2 Tax=Soja TaxID=1462606 RepID=I1LHZ2_SOYBN	2e-142	99.48	UniRef100_A0A445M468 B-box zinc finger protein 19 isoform A n=1 Tax=Glycine soja TaxID=3848 RepID=A0A445M468_GLYSO	5e-130	94.33	AT2G21320.1 | Symbols: | B-box zinc finger family protein | chr2:9126502-9127652 FORWARD LENGTH=172	7e-73	97.42	GO:0006355 GO:0009640 GO:0010100 GO:0070370 GO:0071483	regulation of transcription, DNA-templated; photomorphogenesis; negative regulation of photomorphogenesis; cellular heat acclimation; cellular response to blue light;	GO:0003700 GO:0005515 GO:0008270 GO:0044212	DNA-binding transcription factor activity; protein binding; zinc ion binding; transcription regulatory region DNA binding;	GO:0005634	nucleus	PF00643	zf-B_box;	AT2G21320|BBX18|B-box domain protein 18|F3K23.8|F3K23_8
Glyma.11g075500	193	UniRef100_I1LI02 H15 domain-containing protein n=2 Tax=Soja TaxID=1462606 RepID=I1LI02_SOYBN	2e-122	99.48	UniRef100_I1LI02 H15 domain-containing protein n=2 Tax=Soja TaxID=1462606 RepID=I1LI02_SOYBN	2e-122	99.48	AT2G18050.1 | Symbols: HIS1-3 | histone H1-3 | chr2:7846095-7846670 FORWARD LENGTH=167	3e-37	77.2	GO:0006334 GO:0006355 GO:0009414 GO:0016584 GO:0030261 GO:0031936 GO:0045910	nucleosome assembly; regulation of transcription, DNA-templated; response to water deprivation; nucleosome positioning; chromosome condensation; negative regulation of chromatin silencing; negative regulation of DNA recombination;	GO:0003677 GO:0003690 GO:0031492	DNA binding; double-stranded DNA binding; nucleosomal DNA binding;	GO:0000786 GO:0005634	nucleosome; nucleus	PF00538	Linker_histone;	AT2G18050|HIS1-3|histone H1-3|T27K22.8|T27K22_8
Glyma.11g089700	696	UniRef100_K7LNS0 Uncharacterized protein n=1 Tax=Glycine max TaxID=3847 RepID=K7LNS0_SOYBN	0	99.86	UniRef100_A0A4D6LRP2 Apyrase n=1 Tax=Vigna unguiculata TaxID=3917 RepID=A0A4D6LRP2_VIGUN	0	99.71	AT4G19180.1 | Symbols: | GDA1/CD39 nucleoside phosphatase family protein | chr4:10485518-10487868 REVERSE LENGTH=740	0	97.41	GO:0009901 GO:0010584	anther dehiscence; pollen exine formation;	NA	NA	GO:0005634	nucleus	PF01150	GDA1_CD39;	AT4G19180|APY7|AtAPY7|apyrase 7|T18B16.150|T18B16_150
Glyma.12g116000	375	UniRef100_I1LS52 Uncharacterized protein n=2 Tax=Soja TaxID=1462606 RepID=I1LS52_SOYBN	0	99.73	UniRef100_A0A445HNP5 RNA polymerase II subunit 5-mediating protein-like isoform A n=1 Tax=Glycine soja TaxID=3848 RepID=A0A445HNP5_GLYSO	0	99.73	NA	NA	NA	NA	NA	NA	NA	NA	NA	PF02996	Prefoldin;	AT1G03760|F21M11.33|F21M11_33
Glyma.14g062100	592	UniRef100_A0A445H250 Coronatine-insensitive protein 1 n=1 Tax=Glycine soja TaxID=3848 RepID=A0A445H250_GLYSO	0	99.83	UniRef100_A0A445H250 Coronatine-insensitive protein 1 n=1 Tax=Glycine soja TaxID=3848 RepID=A0A445H250_GLYSO	0	99.83	AT2G39940.1 | Symbols: COI1 | RNI-like superfamily protein | chr2:16672848-16675486 REVERSE LENGTH=592	0	97.97	GO:0006511 GO:0006952 GO:0009611 GO:0009625 GO:0009641 GO:0009753 GO:0009861 GO:0009867 GO:0009901 GO:0009909 GO:0010118 GO:0010218 GO:0016567 GO:0031146 GO:0031348 GO:0042742 GO:0048364 GO:0048443 GO:0050832 GO:0106167	ubiquitin-dependent protein catabolic process; defense response; response to wounding; response to insect; shade avoidance; response to jasmonic acid; jasmonic acid and ethylene-dependent systemic resistance; jasmonic acid mediated signaling pathway; anther dehiscence; regulation of flower development; stomatal movement; response to far red light; protein ubiquitination; SCF-dependent proteasomal…	GO:0005515	protein binding;	GO:0005737 GO:0019005	cytoplasm; SCF ubiquitin ligase complex	NA	NA	AT2G39940|COI1|CORONATINE INSENSITIVE 1|T28M21.10|T28M21_10
Glyma.15g162900	191	UniRef100_K7MBQ6 Uncharacterized protein n=3 Tax=Glycine max TaxID=3847 RepID=K7MBQ6_SOYBN	1e-113	89.01	UniRef100_A0A4D6NT06 Mammalian uncoordinated homology 13 n=1 Tax=Vigna unguiculata TaxID=3917 RepID=A0A4D6NT06_VIGUN	2e-60	77.49	AT2G25800.1 | Symbols: | Protein of unknown function (DUF810) | chr2:11006138-11009728 REVERSE LENGTH=987	1e-32	77.49	GO:0006414	translational elongation;	GO:0003746	translation elongation factor activity;	GO:0009507	chloroplast	PF05664	DUF810;	AT2G25800|F17H15.17|F17H15_17
Glyma.16g159550	293	UniRef100_A0A0R0G1Y1 TIR domain-containing protein n=1 Tax=Glycine max TaxID=3847 RepID=A0A0R0G1Y1_SOYBN	0	93.86	UniRef100_A0A0R0G1Y1 TIR domain-containing protein n=1 Tax=Glycine max TaxID=3847 RepID=A0A0R0G1Y1_SOYBN	0	93.86	AT5G36930.2 | Symbols: | Disease resistance protein (TIR-NBS-LRR class) family | chr5:14567771-14571916 REVERSE LENGTH=1191	1e-55	70.65	GO:0007165	signal transduction;	GO:0043531	ADP binding;	GO:0005737 GO:0016021	cytoplasm; integral component of membrane	PF13676	TIR_2;	AT5G36930|MLF18.50|MLF18_50
Glyma.16g170300	415	UniRef100_I1MPA0 RING-type E3 ubiquitin transferase n=1 Tax=Glycine max TaxID=3847 RepID=I1MPA0_SOYBN	0	99.76	UniRef100_I1MPA0 RING-type E3 ubiquitin transferase n=1 Tax=Glycine max TaxID=3847 RepID=I1MPA0_SOYBN	0	99.76	AT5G09800.1 | Symbols: | ARM repeat superfamily protein | chr5:3043123-3044352 REVERSE LENGTH=409	7e-81	98.8	GO:0010200 GO:0016567	response to chitin; protein ubiquitination;	GO:0004842 GO:0005515	ubiquitin-protein transferase activity; protein binding;	GO:0005634	nucleus	PF04564	U-box;	AT5G09800|F17I14.10|F17I14_10
Glyma.18g074800	683	UniRef100_I1N085 ABC transporter domain-containing protein n=1 Tax=Glycine max TaxID=3847 RepID=I1N085_SOYBN	0	99.85	UniRef100_I1N085 ABC transporter domain-containing protein n=1 Tax=Glycine max TaxID=3847 RepID=I1N085_SOYBN	0	99.85	AT3G13220.1 | Symbols: WBC27, ABCG26 | ABC-2 type transporter family protein | chr3:4247968-4250703 REVERSE LENGTH=685	0	99.27	GO:0009555 GO:0010152 GO:0010584 GO:0055085	pollen development; pollen maturation; pollen exine formation; transmembrane transport;	GO:0005524 GO:0016887 GO:0042626	ATP binding; ATPase activity; ATPase-coupled transmembrane transporter activity;	GO:0005634 GO:0005886 GO:0016021	nucleus; plasma membrane; integral component of membrane	PF00005 PF01061	ABC_tran; ABC2_membrane;	AT3G13220|WBC27|ABCG26|AtABCG26|MSR02|ATP-binding cassette G26|MJG19.25
Glyma.18g199400	844	UniRef100_K7MTG8 Uncharacterized protein n=1 Tax=Glycine max TaxID=3847 RepID=K7MTG8_SOYBN	0	99.88	UniRef100_A0A445FV67 RNA polymerase II C-terminal domain phosphatase-like 2 isoform A n=1 Tax=Glycine soja TaxID=3848 RepID=A0A445FV67_GLYSO	0	99.88	AT5G01270.2 | Symbols: CPL2 | carboxyl-terminal domain (ctd) phosphatase-like 2 | chr5:107943-112143 REVERSE LENGTH=774	0	95.26	GO:0006970 GO:0007275 GO:0009733 GO:0009734 GO:0010025 GO:0045893 GO:0048589 GO:0070940	response to osmotic stress; multicellular organism development; response to auxin; auxin-activated signaling pathway; wax biosynthetic process; positive regulation of transcription, DNA-templated; developmental growth; dephosphorylation of RNA polymerase II C-terminal domain;	GO:0003723 GO:0004647 GO:0005515 GO:0008420 GO:0016791 GO:0046872	RNA binding; phosphoserine phosphatase activity; protein binding; RNA polymerase II CTD heptapeptide repeat phosphatase activity; phosphatase activity; metal ion binding;	GO:0005634 GO:0005737	nucleus; cytoplasm	PF00035 PF03031	dsrm; NIF;	AT5G01270|CPL2|ATCPL2|carboxyl-terminal domain (ctd) phosphatase-like 2|F7J8.250|F7J8_250
Glyma.19g105000	378	UniRef100_A0A0R0EKE6 Uncharacterized protein n=1 Tax=Glycine max TaxID=3847 RepID=A0A0R0EKE6_SOYBN	0	99.74	UniRef100_UPI0003DE755D uncharacterized protein LOC102667948 n=1 Tax=Glycine max TaxID=3847 RepID=UPI0003DE755D	0	94.97	AT4G16790.1 | Symbols: | hydroxyproline-rich glycoprotein family protein | chr4:9451747-9453168 REVERSE LENGTH=473	1e-09	10.85	NA	NA	NA	NA	GO:0005634 GO:0016021	nucleus; integral component of membrane	PF05553	DUF761;	AT4G16790
Glyma.19g220200	395	UniRef100_A0A445FJW3 S-adenosylmethionine synthase n=2 Tax=Soja TaxID=1462606 RepID=A0A445FJW3_GLYSO	0	99.75	UniRef100_A0A445FJW3 S-adenosylmethionine synthase n=2 Tax=Soja TaxID=1462606 RepID=A0A445FJW3_GLYSO	0	99.75	AT4G01850.1 | Symbols: SAM-2, MAT2, SAM2, AtSAM2 | S-adenosylmethionine synthetase 2 | chr4:796298-797479 REVERSE LENGTH=393	0	98.99	GO:0006556 GO:0006730	S-adenosylmethionine biosynthetic process; one-carbon metabolic process;	GO:0004478 GO:0005507 GO:0005515 GO:0005524	methionine adenosyltransferase activity; copper ion binding; protein binding; ATP binding;	GO:0005618 GO:0005730 GO:0005737 GO:0005829 GO:0009506 GO:0070062	cell wall; nucleolus; cytoplasm; cytosol; plasmodesma; extracellular exosome	PF00438 PF02772 PF02773	S-AdoMet_synt_N; S-AdoMet_synt_M; S-AdoMet_synt_C;	AT4G01850|SAM-2|MAT2|SAM2|AtSAM2|S-adenosylmethionine synthetase 2|T7B11.11|T7B11_11
Glyma.19g258100	453	UniRef100_I1NCP2 AAA domain-containing protein n=2 Tax=Soja TaxID=1462606 RepID=I1NCP2_SOYBN	0	99.78	UniRef100_I1NCP2 AAA domain-containing protein n=2 Tax=Soja TaxID=1462606 RepID=I1NCP2_SOYBN	0	99.78	AT2G46620.1 | Symbols: | P-loop containing nucleoside triphosphate hydrolases superfamily protein | chr2:19139071-19140546 REVERSE LENGTH=491	0	97.13	NA	NA	NA	NA	GO:0005576	extracellular region	PF14363 PF00004	AAA_assoc; AAA;	AT2G46620
Glyma.20g048800	1122	UniRef100_UPI0003DEB17A TMV resistance protein N isoform X1 n=1 Tax=Glycine max TaxID=3847 RepID=UPI0003DEB17A	0	99.91	UniRef100_UPI0003DEB17A TMV resistance protein N isoform X1 n=1 Tax=Glycine max TaxID=3847 RepID=UPI0003DEB17A	0	99.91	AT5G17680.1 | Symbols: | disease resistance protein (TIR-NBS-LRR class), putative | chr5:5822999-5827153 FORWARD LENGTH=1294	0	75.58	GO:0007165	signal transduction;	GO:0043531	ADP binding;	GO:0009507	chloroplast	PF07725 PF13676 PF00931	LRR_3; TIR_2; NB-ARC;	AT5G17680|MVA3.30|MVA3_30
Glyma.20g128900	205	UniRef100_I1NFX2 Reticulon-like protein n=1 Tax=Glycine max TaxID=3847 RepID=I1NFX2_SOYBN	2e-142	99.51	UniRef100_I1NFX2 Reticulon-like protein n=1 Tax=Glycine max TaxID=3847 RepID=I1NFX2_SOYBN	2e-142	99.51	AT2G15280.1 | Symbols: | Reticulon family protein | chr2:6640191-6641414 FORWARD LENGTH=201	5e-69	96.1	GO:0008150	biological process;	GO:0003674	molecular function;	GO:0005739 GO:0005789 GO:0016021	mitochondrion; endoplasmic reticulum membrane; integral component of membrane	PF02453	Reticulon;	AT2G15280|RTNLB10|reticulon-like B 10|F27O10.7|F27O10_7
Glyma.20g200500	400	UniRef100_A0A445F7R2 DELLA protein GAI1 n=2 Tax=Soja TaxID=1462606 RepID=A0A445F7R2_GLYSO	0	99.75	UniRef100_A0A445F7R2 DELLA protein GAI1 n=2 Tax=Soja TaxID=1462606 RepID=A0A445F7R2_GLYSO	0	99.75	AT1G14920.1 | Symbols: GAI, RGA2 | GRAS family transcription factor family protein | chr1:5149414-5151015 FORWARD LENGTH=533	3e-139	91	GO:0006355 GO:0006808 GO:0007275 GO:0009651 GO:0009723 GO:0009737 GO:0009739 GO:0009740 GO:0009863 GO:0009867 GO:0009938 GO:0009939 GO:0010029 GO:0010187 GO:0010218 GO:0010233 GO:0010336 GO:0033206 GO:0042538 GO:1903508 GO:2000033 GO:2000377	regulation of transcription, DNA-templated; regulation of nitrogen utilization; multicellular organism development; response to salt stress; response to ethylene; response to abscisic acid; response to gibberellin; gibberellic acid mediated signaling pathway; salicylic acid mediated signaling pathway; jasmonic acid mediated signaling pathway; negative regulation of gibberellic acid mediated signa…	GO:0003700 GO:0003713 GO:0005515 GO:0043565 GO:0044212	DNA-binding transcription factor activity; transcription coactivator activity; protein binding; sequence-specific DNA binding; transcription regulatory region DNA binding;	GO:0005634	nucleus	PF03514	GRAS;	AT1G14920|GAI|RGA2|GIBBERELLIC ACID INSENSITIVE|RESTORATION ON GROWTH ON AMMONIA 2|F10B6.34|F10B6_34|GAI PROTEIN

## Sheet: GO enrichment data
NOTE: In some cases the Corrected P-Value is greater than 1. This can happen when the Bonferroni correction, which multiples the Fisher test p-value by the number of GO terms in the gene list of interest, is applied. Further details can be found in Morales et al. (2013) http://dx.doi.org/10.1071/FP12296
GO_id	Genome_GO_count	Expressed_GO	Expected_expression	Status	Corrected_P	GO_desc
GO:0015996	140	6	0.94158	Overrepresented	0.16367	chlorophyll catabolic process
GO:0010411	29	3	0.195042	Overrepresented	0.406334	xyloglucan metabolic process
GO:0007231	19	2	0.127786	Overrepresented	3.01179	osmosensory signaling pathway
GO:0033500	19	2	0.127786	Overrepresented	3.01179	carbohydrate homeostasis
GO:0001932	2	1	0.0134511	Overrepresented	5.67296	regulation of protein phosphorylation
GO:0006296	2	1	0.0134511	Overrepresented	5.67296	nucleotide-excision repair, DNA incision, 5'-to lesion
GO:0010184	2	1	0.0134511	Overrepresented	5.67296	cytokinin transport
GO:0032197	2	1	0.0134511	Overrepresented	5.67296	transposition, RNA-mediated
GO:0051574	2	1	0.0134511	Overrepresented	5.67296	positive regulation of histone H3-K9 methylation
GO:0090241	2	1	0.0134511	Overrepresented	5.67296	negative regulation of histone H4 acetylation
GO:0071281	78	3	0.524595	Overrepresented	6.64724	cellular response to iron ion
GO:0010492	29	2	0.195042	Overrepresented	6.84298	maintenance of shoot apical meristem identity
GO:0000731	4	1	0.0269023	Overrepresented	11.2705	DNA synthesis involved in DNA repair
GO:0006106	4	1	0.0269023	Overrepresented	11.2705	fumarate metabolic process
GO:0009314	4	1	0.0269023	Overrepresented	11.2705	response to radiation
GO:0010080	4	1	0.0269023	Overrepresented	11.2705	regulation of floral meristem growth
GO:0045732	4	1	0.0269023	Overrepresented	11.2705	positive regulation of protein catabolic process
GO:0052746	4	1	0.0269023	Overrepresented	11.2705	inositol phosphorylation
GO:0031425	42	2	0.282474	Overrepresented	13.7102	chloroplast RNA processing
GO:0006435	5	1	0.0336279	Overrepresented	14.0412	threonyl-tRNA aminoacylation
GO:0007638	5	1	0.0336279	Overrepresented	14.0412	mechanosensory behavior
GO:0010371	5	1	0.0336279	Overrepresented	14.0412	regulation of gibberellin biosynthetic process
GO:0009734	107	3	0.719636	Overrepresented	15.0667	auxin mediated signaling pathway
GO:0005975	911	1	6.127	Underrepresented	15.7335	carbohydrate metabolic process
GO:0000076	6	1	0.0403534	Overrepresented	16.7935	DNA replication checkpoint
GO:0006271	6	1	0.0403534	Overrepresented	16.7935	DNA strand elongation involved in DNA replication
GO:0009835	6	1	0.0403534	Overrepresented	16.7935	fruit ripening
GO:0018377	6	1	0.0403534	Overrepresented	16.7935	protein myristoylation
GO:0060771	6	1	0.0403534	Overrepresented	16.7935	phyllotactic patterning
GO:0060774	6	1	0.0403534	Overrepresented	16.7935	auxin mediated signaling pathway involved in phyllotactic patterning
GO:0009409	1117	2	7.51247	Underrepresented	17.087	response to cold
GO:0006344	7	1	0.047079	Overrepresented	19.5274	maintenance of chromatin silencing
GO:0051938	7	1	0.047079	Overrepresented	19.5274	L-glutamate import
GO:0006863	122	3	0.82052	Overrepresented	20.8508	purine nucleobase transport
GO:0048510	53	2	0.356455	Overrepresented	20.9197	regulation of timing of transition from vegetative to reproductive phase
GO:0000913	8	1	0.0538046	Overrepresented	22.2431	preprophase band assembly
GO:0006269	8	1	0.0538046	Overrepresented	22.2431	DNA replication, synthesis of RNA primer
GO:0018345	8	1	0.0538046	Overrepresented	22.2431	protein palmitoylation
GO:0080163	8	1	0.0538046	Overrepresented	22.2431	regulation of protein serine/threonine phosphatase activity
GO:2000072	8	1	0.0538046	Overrepresented	22.2431	regulation of defense response to fungus, incompatible interaction
GO:0046686	1310	3	8.8105	Underrepresented	24.3551	response to cadmium ion
GO:0009647	9	1	0.0605302	Overrepresented	24.9406	skotomorphogenesis
GO:0048838	9	1	0.0605302	Overrepresented	24.9406	release of seed from dormancy
GO:0060772	9	1	0.0605302	Overrepresented	24.9406	leaf phyllotactic patterning
GO:0009081	10	1	0.0672557	Overrepresented	27.6202	branched-chain amino acid metabolic process
GO:0009150	11	1	0.0739813	Overrepresented	30.2818	purine ribonucleotide metabolic process
GO:0043091	11	1	0.0739813	Overrepresented	30.2818	L-arginine import
GO:0006396	330	5	2.21944	Overrepresented	30.7164	RNA processing
GO:0000712	12	1	0.0807069	Overrepresented	32.9257	resolution of meiotic recombination intermediates
GO:0006556	12	1	0.0807069	Overrepresented	32.9257	S-adenosylmethionine biosynthetic process
GO:0009687	12	1	0.0807069	Overrepresented	32.9257	abscisic acid metabolic process
GO:0032527	12	1	0.0807069	Overrepresented	32.9257	protein exit from endoplasmic reticulum
GO:0009651	1845	6	12.4087	Underrepresented	34.6884	response to salt stress
GO:0019509	13	1	0.0874325	Overrepresented	35.552	L-methionine salvage from methylthioadenosine
GO:0010218	251	4	1.68812	Overrepresented	37.8811	response to far red light
GO:0010628	14	1	0.094158	Overrepresented	38.1607	positive regulation of gene expression
GO:0046621	14	1	0.094158	Overrepresented	38.1607	negative regulation of organ growth
GO:0010187	77	2	0.517869	Overrepresented	40.0692	negative regulation of seed germination
GO:0031048	261	4	1.75537	Overrepresented	42.1686	chromatin silencing by small RNA
GO:0000710	16	1	0.107609	Overrepresented	43.326	meiotic mismatch repair
GO:0010375	16	1	0.107609	Overrepresented	43.326	stomatal complex patterning
GO:0015743	16	1	0.107609	Overrepresented	43.326	malate transport
GO:0017004	16	1	0.107609	Overrepresented	43.326	cytochrome complex assembly
GO:0035265	16	1	0.107609	Overrepresented	43.326	organ growth
GO:2000033	16	1	0.107609	Overrepresented	43.326	regulation of seed dormancy process
GO:0006259	84	2	0.564948	Overrepresented	46.3371	DNA metabolic process
GO:0001736	18	1	0.12106	Overrepresented	48.4226	establishment of planar polarity
GO:0010236	18	1	0.12106	Overrepresented	48.4226	plastoquinone biosynthetic process
GO:0031146	18	1	0.12106	Overrepresented	48.4226	SCF-dependent proteasomal ubiquitin-dependent protein catabolic process
GO:0044030	18	1	0.12106	Overrepresented	48.4226	regulation of DNA methylation
GO:0048768	18	1	0.12106	Overrepresented	48.4226	root hair cell tip growth
GO:0006655	176	3	1.1837	Overrepresented	48.82	phosphatidylglycerol biosynthetic process
GO:0006808	19	1	0.127786	Overrepresented	50.9455	regulation of nitrogen utilization
GO:2000067	19	1	0.127786	Overrepresented	50.9455	regulation of root morphogenesis
GO:0006470	181	3	1.21733	Overrepresented	51.8945	protein dephosphorylation
GO:0009904	20	1	0.134511	Overrepresented	53.4515	chloroplast accumulation movement
GO:0000910	92	2	0.618753	Overrepresented	53.7882	cytokinesis
GO:0035194	21	1	0.141237	Overrepresented	55.9407	posttranscriptional gene silencing by RNA
GO:0042939	21	1	0.141237	Overrepresented	55.9407	tripeptide transport
GO:0048449	190	3	1.27786	Overrepresented	57.5996	floral organ formation
GO:0007188	22	1	0.147963	Overrepresented	58.4134	adenylate cyclase-modulating G-protein coupled receptor signaling pathway
GO:0010497	22	1	0.147963	Overrepresented	58.4134	plasmodesmata-mediated intercellular transport
GO:0042938	22	1	0.147963	Overrepresented	58.4134	dipeptide transport
GO:0009861	23	1	0.154688	Overrepresented	60.8695	jasmonic acid and ethylene-dependent systemic resistance
GO:0006096	661	1	4.4456	Underrepresented	60.9188	glycolysis
GO:0006184	100	2	0.672557	Overrepresented	61.4968	GTP catabolic process
GO:0009903	24	1	0.161414	Overrepresented	63.3093	chloroplast avoidance movement
GO:0006346	306	4	2.05803	Overrepresented	63.9697	methylation-dependent chromatin silencing
GO:0030163	103	2	0.692734	Overrepresented	64.4441	protein catabolic process
GO:0016043	25	1	0.168139	Overrepresented	65.7327	cellular component organization
GO:0016441	25	1	0.168139	Overrepresented	65.7327	posttranscriptional gene silencing
GO:0016246	203	3	1.36529	Overrepresented	66.1945	RNA interference
GO:0010233	26	1	0.174865	Overrepresented	68.14	phloem transport
GO:0048523	26	1	0.174865	Overrepresented	68.14	negative regulation of cellular process
GO:0030243	107	2	0.719636	Overrepresented	68.4159	cellulose metabolic process
GO:0006468	2386	10	16.0472	Underrepresented	68.5529	protein phosphorylation
GO:0009938	27	1	0.18159	Overrepresented	70.5313	negative regulation of gibberellic acid mediated signaling pathway
GO:0071369	27	1	0.18159	Overrepresented	70.5313	cellular response to ethylene stimulus
GO:0009740	212	3	1.42582	Overrepresented	72.3632	gibberellic acid mediated signaling pathway
GO:0032940	28	1	0.188316	Overrepresented	72.9065	secretion by cell
GO:0010440	113	2	0.75999	Overrepresented	74.4528	stomatal lineage progression
GO:0003333	29	1	0.195042	Overrepresented	75.266	amino acid transmembrane transport
GO:0010584	114	2	0.766715	Overrepresented	75.4672	pollen exine formation
GO:0042742	1063	3	7.14928	Underrepresented	76.4318	defense response to bacterium
GO:0052542	116	2	0.780167	Overrepresented	77.5023	defense response by callose deposition
GO:0006349	30	1	0.201767	Overrepresented	77.6096	regulation of gene expression by genetic imprinting
GO:0010555	30	1	0.201767	Overrepresented	77.6096	response to mannitol stimulus
GO:0043039	30	1	0.201767	Overrepresented	77.6096	tRNA aminoacylation
GO:0015698	31	1	0.208493	Overrepresented	79.9377	inorganic anion transport
GO:0009644	582	1	3.91428	Underrepresented	83.9349	response to high light intensity
GO:0019932	33	1	0.221944	Overrepresented	84.5472	second-messenger-mediated signaling
GO:0010541	34	1	0.228669	Overrepresented	86.8289	acropetal auxin transport
GO:0006598	126	2	0.847422	Overrepresented	87.7869	polyamine catabolic process
GO:0006790	35	1	0.235395	Overrepresented	89.0954	sulfur compound metabolic process
GO:0010189	35	1	0.235395	Overrepresented	89.0954	vitamin E biosynthetic process
GO:0010325	35	1	0.235395	Overrepresented	89.0954	raffinose family oligosaccharide biosynthetic process
GO:0071732	36	1	0.242121	Overrepresented	91.3468	cellular response to nitric oxide
GO:0042398	130	2	0.874325	Overrepresented	91.9415	cellular modified amino acid biosynthetic process
GO:0015931	37	1	0.248846	Overrepresented	93.5831	nucleobase-containing compound transport
GO:0032875	37	1	0.248846	Overrepresented	93.5831	regulation of DNA endoreduplication
GO:0048444	37	1	0.248846	Overrepresented	93.5831	floral organ morphogenesis
GO:0080168	38	1	0.255572	Overrepresented	95.8045	abscisic acid transport
GO:0015824	246	3	1.65449	Overrepresented	96.9285	proline transport
GO:0010100	39	1	0.262297	Overrepresented	98.0111	negative regulation of photomorphogenesis
GO:0010152	39	1	0.262297	Overrepresented	98.0111	pollen maturation
GO:0009641	40	1	0.269023	Overrepresented	100.203	shade avoidance
GO:0009086	251	3	1.68812	Overrepresented	100.671	methionine biosynthetic process
GO:0072593	41	1	0.275749	Overrepresented	102.38	reactive oxygen species metabolic process
GO:0007276	42	1	0.282474	Overrepresented	104.543	gamete generation
GO:0033043	44	1	0.295925	Overrepresented	108.825	regulation of organelle organization
GO:0009753	756	2	5.08453	Underrepresented	109.186	response to jasmonic acid stimulus
GO:0010167	479	5	3.22155	Overrepresented	110.228	response to nitrate
GO:0010102	45	1	0.302651	Overrepresented	110.945	lateral root morphogenesis
GO:0015706	486	5	3.26863	Overrepresented	113.025	nitrate transport
GO:0003002	46	1	0.309376	Overrepresented	113.05	regionalization
GO:0000724	151	2	1.01556	Overrepresented	113.949	double-strand break repair via homologous recombination
GO:0009693	270	3	1.8159	Overrepresented	115.091	ethylene biosynthetic process
GO:0006099	47	1	0.316102	Overrepresented	115.142	tricarboxylic acid cycle
GO:0010315	47	1	0.316102	Overrepresented	115.142	auxin efflux
GO:0009640	502	1	3.37624	Underrepresented	116.435	photomorphogenesis
GO:0042542	511	1	3.43677	Underrepresented	116.714	response to hydrogen peroxide
GO:0006289	48	1	0.322828	Overrepresented	117.219	nucleotide-excision repair
GO:0032502	48	1	0.322828	Overrepresented	117.219	developmental process
GO:0016458	156	2	1.04919	Overrepresented	119.203	gene silencing
GO:0007186	49	1	0.329553	Overrepresented	119.283	G-protein coupled receptor signaling pathway
GO:0009901	49	1	0.329553	Overrepresented	119.283	anther dehiscence
GO:0010229	49	1	0.329553	Overrepresented	119.283	inflorescence development
GO:0016192	549	1	3.69234	Underrepresented	120.183	vesicle-mediated transport
GO:0048829	50	1	0.336279	Overrepresented	121.333	root cap development
GO:0071805	50	1	0.336279	Overrepresented	121.333	potassium ion transmembrane transport
GO:0006270	159	2	1.06937	Overrepresented	122.352	DNA replication initiation
GO:0010044	51	1	0.343004	Overrepresented	123.369	response to aluminum ion
GO:0006817	52	1	0.34973	Overrepresented	125.391	phosphate ion transport
GO:0009698	163	2	1.09627	Overrepresented	126.545	phenylpropanoid metabolic process
GO:0016570	163	2	1.09627	Overrepresented	126.545	histone modification
GO:0006970	345	4	2.32032	Overrepresented	127.664	response to osmotic stress
GO:0006810	883	3	5.93868	Underrepresented	127.675	transport
GO:0055114	2341	11	15.7446	Underrepresented	129.263	oxidation-reduction process
GO:0010074	54	1	0.363181	Overrepresented	129.396	maintenance of meristem identity
GO:2000377	55	1	0.369907	Overrepresented	131.378	regulation of reactive oxygen species metabolic process
GO:0042138	169	2	1.13662	Overrepresented	132.817	meiotic DNA double-strand break formation
GO:0009743	57	1	0.383358	Overrepresented	135.304	response to carbohydrate stimulus
GO:0010119	172	2	1.1568	Overrepresented	135.943	regulation of stomatal movement
GO:0006979	632	6	4.25056	Overrepresented	138.537	response to oxidative stress
GO:0010025	59	1	0.396809	Overrepresented	139.176	wax biosynthetic process
GO:0019953	59	1	0.396809	Overrepresented	139.176	sexual reproduction
GO:0043622	59	1	0.396809	Overrepresented	139.176	cortical microtubule organization
GO:0010050	176	2	1.1837	Overrepresented	140.098	vegetative phase change
GO:0010468	61	1	0.41026	Overrepresented	142.998	regulation of gene expression
GO:0007020	180	2	1.2106	Overrepresented	144.236	microtubule nucleation
GO:0006807	62	1	0.416986	Overrepresented	144.889	nitrogen compound metabolic process
GO:0055085	1061	4	7.13583	Underrepresented	144.908	transmembrane transport
GO:0002238	63	1	0.423711	Overrepresented	146.768	response to molecule of fungal origin
GO:0006949	63	1	0.423711	Overrepresented	146.768	syncytium formation
GO:0000278	398	4	2.67678	Overrepresented	147.239	mitotic cell cycle
GO:0010540	64	1	0.430437	Overrepresented	148.634	basipetal auxin transport
GO:0006855	185	2	1.24423	Overrepresented	149.383	drug transmembrane transport
GO:0045736	65	1	0.437162	Overrepresented	150.488	negative regulation of cyclin-dependent protein serine/threonine kinase activity
GO:0034660	187	2	1.25768	Overrepresented	151.432	ncRNA metabolic process
GO:0048608	67	1	0.450613	Overrepresented	154.159	reproductive structure development
GO:0009958	68	1	0.457339	Overrepresented	155.976	positive gravitropism
GO:0019745	69	1	0.464065	Overrepresented	157.781	pentacyclic triterpenoid biosynthetic process
GO:0006417	70	1	0.47079	Overrepresented	159.574	regulation of translation
GO:0009294	70	1	0.47079	Overrepresented	159.574	DNA mediated transformation
GO:0019344	459	1	3.08704	Underrepresented	163.214	cysteine biosynthetic process
GO:0009860	460	1	3.09376	Underrepresented	163.299	pollen tube growth
GO:0006094	463	1	3.11394	Underrepresented	163.572	gluconeogenesis
GO:0000041	201	2	1.35184	Overrepresented	165.615	transition metal ion transport
GO:0040007	201	2	1.35184	Overrepresented	165.615	growth
GO:0009944	203	2	1.36529	Overrepresented	167.615	polarity specification of adaxial/abaxial axis
GO:0009741	206	2	1.38547	Overrepresented	170.602	response to brassinosteroid stimulus
GO:0050665	206	2	1.38547	Overrepresented	170.602	hydrogen peroxide biosynthetic process
GO:0033044	208	2	1.39892	Overrepresented	172.585	regulation of chromosome organization
GO:0045132	208	2	1.39892	Overrepresented	172.585	meiotic chromosome segregation
GO:0000303	81	1	0.544771	Overrepresented	178.522	response to superoxide
GO:0009625	83	1	0.558223	Overrepresented	181.82	response to insect
GO:0010359	83	1	0.558223	Overrepresented	181.82	regulation of anion channel activity
GO:0009828	84	1	0.564948	Overrepresented	183.452	plant-type cell wall loosening
GO:0007155	272	3	1.82936	Overrepresented	185.29	cell adhesion
GO:0000271	274	3	1.84281	Overrepresented	185.908	polysaccharide biosynthetic process
GO:0007017	86	1	0.578399	Overrepresented	186.684	microtubule-based process
GO:0030036	88	1	0.59185	Overrepresented	189.873	actin cytoskeleton organization
GO:0019288	581	5	3.90756	Overrepresented	190.54	isopentenyl diphosphate biosynthetic process, mevalonate-independent pathway
GO:0016567	597	2	4.01517	Underrepresented	191.835	protein ubiquitination
GO:0006418	91	1	0.612027	Overrepresented	194.578	tRNA aminoacylation for protein translation
GO:0009697	653	6	4.3918	Overrepresented	196.437	salicylic acid biosynthetic process
GO:0009873	311	3	2.09165	Overrepresented	199.572	ethylene mediated signaling pathway
GO:0045010	312	3	2.09838	Overrepresented	199.991	actin nucleation
GO:0007623	315	3	2.11856	Overrepresented	201.26	circadian rhythm
GO:0030154	324	3	2.17909	Overrepresented	205.176	cell differentiation
GO:0009269	98	1	0.659106	Overrepresented	205.193	response to desiccation
GO:0051225	98	1	0.659106	Overrepresented	205.193	spindle assembly
GO:0051302	100	1	0.672557	Overrepresented	208.136	regulation of cell division
GO:0006862	101	1	0.679283	Overrepresented	209.592	nucleotide transport
GO:0042752	101	1	0.679283	Overrepresented	209.592	regulation of circadian rhythm
GO:0043269	101	1	0.679283	Overrepresented	209.592	regulation of ion transport
GO:0006355	4060	23	27.3058	Underrepresented	209.878	regulation of transcription, DNA-dependent
GO:0015802	102	1	0.686008	Overrepresented	211.039	basic amino acid transport
GO:0006813	103	1	0.692734	Overrepresented	212.476	potassium ion transport
GO:0048589	103	1	0.692734	Overrepresented	212.476	developmental growth
GO:0010228	754	3	5.07108	Underrepresented	213.199	vegetative to reproductive phase transition of meristem
GO:0006412	763	3	5.13161	Underrepresented	213.504	translation
GO:0051726	345	3	2.32032	Overrepresented	214.844	regulation of cell cycle
GO:0015696	105	1	0.706185	Overrepresented	215.322	ammonium transport
GO:0032204	105	1	0.706185	Overrepresented	215.322	regulation of telomere maintenance
GO:0043247	105	1	0.706185	Overrepresented	215.322	telomere maintenance in response to DNA damage
GO:0048868	105	1	0.706185	Overrepresented	215.322	pollen tube development
GO:0006200	106	1	0.712911	Overrepresented	216.731	ATP catabolic process
GO:0009686	106	1	0.712911	Overrepresented	216.731	gibberellin biosynthetic process
GO:0009910	106	1	0.712911	Overrepresented	216.731	negative regulation of flower development
GO:0009846	108	1	0.726362	Overrepresented	219.52	pollen germination
GO:0010118	108	1	0.726362	Overrepresented	219.52	stomatal movement
GO:0016049	360	3	2.42121	Overrepresented	222.096	cell growth
GO:0006312	110	1	0.739813	Overrepresented	222.272	mitotic recombination
GO:0010103	362	3	2.43466	Overrepresented	223.079	stomatal complex morphogenesis
GO:0006520	111	1	0.746539	Overrepresented	223.634	cellular amino acid metabolic process
GO:0006342	372	1	2.50191	Underrepresented	224.764	chromatin silencing
GO:0019252	372	1	2.50191	Underrepresented	224.764	starch biosynthetic process
GO:0048364	401	1	2.69695	Underrepresented	226.598	root development
GO:0006886	410	1	2.75749	Underrepresented	227.652	intracellular protein transport
GO:0051788	426	1	2.86509	Underrepresented	230.03	response to misfolded protein
GO:0006091	116	1	0.780167	Overrepresented	230.31	generation of precursor metabolites and energy
GO:0009411	116	1	0.780167	Overrepresented	230.31	response to UV
GO:0051567	443	4	2.97943	Overrepresented	233.199	histone H3-K9 methylation
GO:0046482	119	1	0.800343	Overrepresented	234.209	para-aminobenzoic acid metabolic process
GO:0010583	454	4	3.05341	Overrepresented	235.563	response to cyclopentenone
GO:0009556	121	1	0.813794	Overrepresented	236.765	microsporogenesis
GO:0010029	122	1	0.82052	Overrepresented	238.031	regulation of seed germination
GO:0010027	469	4	3.15429	Overrepresented	239.14	thylakoid membrane organization
GO:0006499	1045	5	7.02822	Underrepresented	242.273	N-terminal protein myristoylation
GO:0006334	128	1	0.860873	Overrepresented	245.448	nucleosome assembly
GO:0006310	130	1	0.874325	Overrepresented	247.854	DNA recombination
GO:0016051	130	1	0.874325	Overrepresented	247.854	carbohydrate biosynthetic process
GO:0030968	501	4	3.36951	Overrepresented	247.909	endoplasmic reticulum unfolded protein response
GO:0009610	134	1	0.901227	Overrepresented	252.572	response to symbiotic fungus
GO:0009744	531	2	3.57128	Underrepresented	252.926	response to sucrose stimulus
GO:0006364	532	2	3.57801	Underrepresented	252.954	rRNA processing
GO:0010310	535	2	3.59818	Underrepresented	253.048	regulation of hydrogen peroxide metabolic process
GO:0007126	137	1	0.921404	Overrepresented	256.028	meiosis
GO:0010043	137	1	0.921404	Overrepresented	256.028	response to zinc ion
GO:0010015	138	1	0.928129	Overrepresented	257.165	root morphogenesis
GO:0043086	138	1	0.928129	Overrepresented	257.165	negative regulation of catalytic activity
GO:0010311	139	1	0.934855	Overrepresented	258.294	lateral root formation
GO:0010431	139	1	0.934855	Overrepresented	258.294	seed maturation
GO:0010264	140	1	0.94158	Overrepresented	259.416	myo-inositol hexakisphosphate biosynthetic process
GO:0006511	619	5	4.16313	Overrepresented	261.991	ubiquitin-dependent protein catabolic process
GO:0006820	143	1	0.961757	Overrepresented	262.736	anion transport
GO:0008361	144	1	0.968483	Overrepresented	263.828	regulation of cell size
GO:0030048	148	1	0.995385	Overrepresented	268.123	actin filament-based movement
GO:0009862	688	3	4.62719	Underrepresented	271.757	systemic acquired resistance, salicylic acid mediated signaling pathway
GO:0009909	744	6	5.00383	Overrepresented	275.317	regulation of flower development
GO:0016926	219	2	1.4729	Overrepresented	281.374	protein desumoylation
GO:0009624	221	2	1.48635	Overrepresented	281.998	response to nematode
GO:0006354	225	2	1.51325	Overrepresented	283.273	DNA-dependent transcription, elongation
GO:0009902	230	2	1.54688	Overrepresented	284.913	chloroplast relocation
GO:0009739	250	2	1.68139	Overrepresented	291.897	response to gibberellin stimulus
GO:0006275	255	2	1.71502	Overrepresented	293.727	regulation of DNA replication
GO:0051707	255	2	1.71502	Overrepresented	293.727	response to other organism
GO:0031047	256	2	1.72175	Overrepresented	294.097	gene silencing by RNA
GO:0042023	257	2	1.72847	Overrepresented	294.467	DNA endoreduplication
GO:0034968	258	2	1.7352	Overrepresented	294.838	histone lysine methylation
GO:0007131	263	2	1.76883	Overrepresented	296.706	reciprocal meiotic recombination
GO:0010363	1019	5	6.85336	Underrepresented	296.757	regulation of plant-type hypersensitive response
GO:0006612	1020	5	6.86008	Underrepresented	296.799	protein targeting to membrane
GO:0043900	264	2	1.77555	Overrepresented	297.083	regulation of multi-organism process
GO:0009611	1031	5	6.93407	Underrepresented	297.303	response to wounding
GO:0042545	266	2	1.789	Overrepresented	297.837	cell wall modification
GO:0009616	267	2	1.79573	Overrepresented	298.216	virus induced gene silencing
GO:0009826	274	2	1.84281	Overrepresented	300.882	unidimensional cell growth
GO:0009595	278	2	1.86971	Overrepresented	302.417	detection of biotic stimulus
GO:0006952	1116	8	7.50574	Overrepresented	304.001	defense response
GO:0009560	289	2	1.94369	Overrepresented	306.668	embryo sac egg cell differentiation
GO:0015995	294	2	1.97732	Overrepresented	308.609	chlorophyll biosynthetic process
GO:0006888	311	1	2.09165	Underrepresented	310.361	ER to Golgi vesicle-mediated transport
GO:0009658	316	1	2.12528	Underrepresented	310.542	chloroplast organization
GO:0080129	319	1	2.14546	Underrepresented	310.679	proteasome core complex assembly
GO:0009827	322	1	2.16563	Underrepresented	310.836	plant-type cell wall modification
GO:0006816	324	1	2.17909	Underrepresented	310.951	calcium ion transport
GO:0016036	330	1	2.21944	Underrepresented	311.35	cellular response to phosphate starvation
GO:0048366	332	1	2.23289	Underrepresented	311.5	leaf development
GO:0006857	336	1	2.25979	Underrepresented	311.824	oligopeptide transport
GO:0035304	337	1	2.26652	Underrepresented	311.909	regulation of protein dephosphorylation
GO:0035196	342	1	2.30015	Underrepresented	312.368	production of miRNAs involved in gene silencing by miRNA
GO:0048573	342	1	2.30015	Underrepresented	312.368	photoperiodism, flowering
GO:0009630	358	1	2.40776	Underrepresented	314.14	gravitropism
GO:0016126	363	1	2.44138	Underrepresented	314.781	sterol biosynthetic process
GO:0010090	387	3	2.6028	Overrepresented	318.366	trichome morphogenesis
GO:0008283	388	3	2.60952	Overrepresented	318.532	cell proliferation
GO:0048765	396	3	2.66333	Overrepresented	319.898	root hair cell differentiation
GO:0009555	405	3	2.72386	Overrepresented	321.517	pollen development
GO:0010162	406	3	2.73058	Overrepresented	321.701	seed dormancy process
GO:0002679	420	3	2.82474	Overrepresented	324.383	respiratory burst involved in defense response
GO:0006306	421	3	2.83147	Overrepresented	324.58	DNA methylation
GO:0071555	448	2	3.01306	Underrepresented	330.072	cell wall organization
GO:0015979	452	2	3.03996	Underrepresented	330.081	photosynthesis
GO:0048193	457	2	3.07359	Underrepresented	330.123	Golgi vesicle transport
GO:0009863	458	2	3.08031	Underrepresented	330.136	salicylic acid mediated signaling pathway
GO:0000911	471	2	3.16775	Underrepresented	330.423	cytokinesis by cell plate formation
GO:0046777	477	2	3.2081	Underrepresented	330.63	protein autophosphorylation
GO:0034976	483	2	3.24845	Underrepresented	330.883	response to endoplasmic reticulum stress
GO:0010413	495	2	3.32916	Underrepresented	331.517	glucuronoxylan metabolic process
GO:0045492	497	2	3.34261	Underrepresented	331.638	xylan biosynthetic process
GO:0048767	504	2	3.38969	Underrepresented	332.1	root hair elongation
GO:0043069	525	4	3.53093	Overrepresented	333.788	negative regulation of programmed cell death
GO:0006629	534	4	3.59146	Overrepresented	334.639	lipid metabolic process
GO:0009738	634	3	4.26401	Underrepresented	342.881	abscisic acid mediated signaling pathway
GO:0009408	659	3	4.43215	Underrepresented	343.92	response to heat
GO:0009723	726	5	4.88277	Overrepresented	348.801	response to ethylene stimulus
GO:0031348	766	4	5.15179	Underrepresented	350.893	negative regulation of defense response
GO:0006457	779	4	5.23922	Underrepresented	351.103	protein folding
GO:0009414	888	6	5.97231	Overrepresented	356.498	response to water deprivation
GO:0006508	938	5	6.30859	Underrepresented	357.518	proteolysis
GO:0045893	1080	6	7.26362	Underrepresented	362.271	positive regulation of transcription, DNA-dependent
GO:0007165	1328	9	8.93156	Overrepresented	368.723	signal transduction
GO:0000165	575	3	3.8672	Underrepresented	426	MAPK cascade
GO:0000226	379	2	2.54899	Underrepresented	426	microtubule cytoskeleton organization
GO:0000394	343	2	2.30687	Underrepresented	426	RNA splicing, via endonucleolytic cleavage and ligation
GO:0001510	418	2	2.81129	Underrepresented	426	RNA methylation
GO:0002237	263	1	1.76883	Underrepresented	426	response to molecule of bacterial origin
GO:0006098	421	2	2.83147	Underrepresented	426	pentose-phosphate shunt
GO:0006260	270	1	1.8159	Underrepresented	426	DNA replication
GO:0006261	234	1	1.57378	Underrepresented	426	DNA-dependent DNA replication
GO:0006281	290	1	1.95042	Underrepresented	426	DNA repair
GO:0006487	298	1	2.00422	Underrepresented	426	protein N-linked glycosylation
GO:0006569	193	1	1.29804	Underrepresented	426	tryptophan catabolic process
GO:0006626	235	1	1.58051	Underrepresented	426	protein targeting to mitochondrion
GO:0006636	204	1	1.37202	Underrepresented	426	unsaturated fatty acid biosynthetic process
GO:0006661	183	1	1.23078	Underrepresented	426	phosphatidylinositol biosynthetic process
GO:0006826	241	1	1.62086	Underrepresented	426	iron ion transport
GO:0006865	444	2	2.98615	Underrepresented	426	amino acid transport
GO:0006869	279	1	1.87643	Underrepresented	426	lipid transport
GO:0006944	717	4	4.82224	Underrepresented	426	cellular membrane fusion
GO:0007010	282	1	1.89661	Underrepresented	426	cytoskeleton organization
GO:0007018	184	1	1.23751	Underrepresented	426	microtubule-based movement
GO:0007062	299	2	2.01095	Underrepresented	426	sister chromatid cohesion
GO:0007154	186	1	1.25096	Underrepresented	426	cell communication
GO:0007169	348	2	2.3405	Underrepresented	426	transmembrane receptor protein tyrosine kinase signaling pathway
GO:0007264	193	1	1.29804	Underrepresented	426	small GTPase mediated signal transduction
GO:0007389	179	1	1.20388	Underrepresented	426	pattern specification process
GO:0009117	150	1	1.00884	Underrepresented	426	nucleotide metabolic process
GO:0009407	535	3	3.59818	Underrepresented	426	toxin catabolic process
GO:0009612	152	1	1.02229	Underrepresented	426	response to mechanical stimulus
GO:0009627	751	5	5.05091	Underrepresented	426	systemic acquired resistance
GO:0009637	269	1	1.80918	Underrepresented	426	response to blue light
GO:0009639	232	1	1.56033	Underrepresented	426	response to red or far red light
GO:0009657	201	1	1.35184	Underrepresented	426	plastid organization
GO:0009684	232	1	1.56033	Underrepresented	426	indoleacetic acid biosynthetic process
GO:0009733	1020	6	6.86008	Underrepresented	426	response to auxin stimulus
GO:0009737	1254	8	8.43387	Underrepresented	426	response to abscisic acid stimulus
GO:0009749	195	1	1.31149	Underrepresented	426	response to glucose stimulus
GO:0009750	362	2	2.43466	Underrepresented	426	response to fructose stimulus
GO:0009793	1180	7	7.93618	Underrepresented	426	embryo development ending in seed dormancy
GO:0009805	186	1	1.25096	Underrepresented	426	coumarin biosynthetic process
GO:0009813	218	1	1.46618	Underrepresented	426	flavonoid biosynthetic process
GO:0009814	196	1	1.31821	Underrepresented	426	defense response, incompatible interaction
GO:0009825	265	1	1.78228	Underrepresented	426	multidimensional cell growth
GO:0009832	313	2	2.1051	Underrepresented	426	plant-type cell wall biogenesis
GO:0009845	482	3	3.24173	Underrepresented	426	seed germination
GO:0009853	337	2	2.26652	Underrepresented	426	photorespiration
GO:0009855	326	2	2.19254	Underrepresented	426	determination of bilateral symmetry
GO:0009867	800	5	5.38046	Underrepresented	426	jasmonic acid mediated signaling pathway
GO:0009887	289	1	1.94369	Underrepresented	426	organ morphogenesis
GO:0009908	269	1	1.80918	Underrepresented	426	flower development
GO:0009926	251	1	1.68812	Underrepresented	426	auxin polar transport
GO:0009932	248	1	1.66794	Underrepresented	426	cell tip growth
GO:0009933	233	1	1.56706	Underrepresented	426	meristem structural organization
GO:0009965	489	3	3.28881	Underrepresented	426	leaf morphogenesis
GO:0010014	342	2	2.30015	Underrepresented	426	meristem initiation
GO:0010048	240	1	1.61414	Underrepresented	426	vernalization response
GO:0010075	450	3	3.02651	Underrepresented	426	regulation of meristem growth
GO:0010089	225	1	1.51325	Underrepresented	426	xylem development
GO:0010106	237	1	1.59396	Underrepresented	426	cellular response to iron ion starvation
GO:0010114	252	1	1.69484	Underrepresented	426	response to red light
GO:0010150	230	1	1.54688	Underrepresented	426	leaf senescence
GO:0010155	191	1	1.28458	Underrepresented	426	regulation of proton transport
GO:0010200	1135	7	7.63353	Underrepresented	426	response to chitin
GO:0010207	372	2	2.50191	Underrepresented	426	photosystem II assembly
GO:0010224	278	1	1.86971	Underrepresented	426	response to UV-B
GO:0010267	296	1	1.99077	Underrepresented	426	production of ta-siRNAs involved in RNA interference
GO:0010332	157	1	1.05592	Underrepresented	426	response to gamma radiation
GO:0010389	155	1	1.04246	Underrepresented	426	regulation of G2/M transition of mitotic cell cycle
GO:0010498	244	1	1.64104	Underrepresented	426	proteasomal protein catabolic process
GO:0010817	212	1	1.42582	Underrepresented	426	regulation of hormone levels
GO:0015031	286	1	1.92351	Underrepresented	426	protein transport
GO:0016117	259	1	1.74192	Underrepresented	426	carotenoid biosynthetic process
GO:0016132	271	1	1.82263	Underrepresented	426	brassinosteroid biosynthetic process
GO:0016556	220	1	1.47963	Underrepresented	426	mRNA modification
GO:0016572	159	1	1.06937	Underrepresented	426	histone phosphorylation
GO:0019761	349	2	2.34723	Underrepresented	426	glucosinolate biosynthetic process
GO:0035556	479	3	3.22155	Underrepresented	426	intracellular signal transduction
GO:0042254	264	1	1.77555	Underrepresented	426	ribosome biogenesis
GO:0042538	461	3	3.10049	Underrepresented	426	hyperosmotic salinity response
GO:0042546	185	1	1.24423	Underrepresented	426	cell wall biogenesis
GO:0042631	190	1	1.27786	Underrepresented	426	cellular response to water deprivation
GO:0042793	169	1	1.13662	Underrepresented	426	transcription from plastid promoter
GO:0043090	266	1	1.789	Underrepresented	426	amino acid import
GO:0043481	310	2	2.08493	Underrepresented	426	anthocyanin accumulation in tissues in response to UV light
GO:0044036	222	1	1.49308	Underrepresented	426	cell wall macromolecule metabolic process
GO:0048440	176	1	1.1837	Underrepresented	426	carpel development
GO:0048443	263	1	1.76883	Underrepresented	426	stamen development
GO:0050826	221	1	1.48635	Underrepresented	426	response to freezing
GO:0050832	941	6	6.32876	Underrepresented	426	defense response to fungus
GO:0051301	211	1	1.4191	Underrepresented	426	cell division
GO:0051510	175	1	1.17698	Underrepresented	426	regulation of unidimensional cell growth
GO:0031492	1	1	0.00625939	Overrepresented	1.03883	nucleosomal DNA binding
GO:0001093	2	1	0.0125188	Overrepresented	2.07121	TFIIB-class transcription factor binding
GO:0008603	2	1	0.0125188	Overrepresented	2.07121	cAMP-dependent protein kinase regulator activity
GO:0010997	2	1	0.0125188	Overrepresented	2.07121	anaphase-promoting complex binding
GO:0015211	2	1	0.0125188	Overrepresented	2.07121	purine nucleoside transmembrane transporter activity
GO:0004352	3	1	0.0187782	Overrepresented	3.09718	glutamate dehydrogenase (NAD+) activity
GO:0046522	3	1	0.0187782	Overrepresented	3.09718	S-methyl-5-thioribose kinase activity
GO:0051990	3	1	0.0187782	Overrepresented	3.09718	(R)-2-hydroxyglutarate dehydrogenase activity
GO:0008237	97	3	0.60716	Overrepresented	3.82948	metallopeptidase activity
GO:0000014	4	1	0.0250375	Overrepresented	4.11678	single-stranded DNA specific endodeoxyribonuclease activity
GO:0001882	4	1	0.0250375	Overrepresented	4.11678	nucleoside binding
GO:0003680	4	1	0.0250375	Overrepresented	4.11678	AT DNA binding
GO:0004333	4	1	0.0250375	Overrepresented	4.11678	fumarate hydratase activity
GO:0004829	5	1	0.0312969	Overrepresented	5.13006	threonine-tRNA ligase activity
GO:0016871	5	1	0.0312969	Overrepresented	5.13006	cycloartenol synthase activity
GO:0051741	5	1	0.0312969	Overrepresented	5.13006	2-methyl-6-phytyl-1,4-benzoquinone methyltransferase activity
GO:0004222	128	3	0.801201	Overrepresented	7.71566	metalloendopeptidase activity
GO:0003677	3934	15	24.6244	Underrepresented	7.92158	DNA binding
GO:0004353	8	1	0.0500751	Overrepresented	8.13229	glutamate dehydrogenase [NAD(P)+] activity
GO:0004647	8	1	0.0500751	Overrepresented	8.13229	phosphoserine phosphatase activity
GO:0016818	59	2	0.369304	Overrepresented	8.74504	hydrolase activity, acting on acid anhydrides, in phosphorus-containing anhydrides
GO:0070063	9	1	0.0563345	Overrepresented	9.12064	RNA polymerase binding
GO:0004084	10	1	0.0625939	Overrepresented	10.1029	branched-chain-amino-acid transaminase activity
GO:0015631	10	1	0.0625939	Overrepresented	10.1029	tubulin binding
GO:0047325	10	1	0.0625939	Overrepresented	10.1029	inositol tetrakisphosphate 1-kinase activity
GO:0052726	10	1	0.0625939	Overrepresented	10.1029	inositol-1,3,4-trisphosphate 5-kinase activity
GO:0004601	237	4	1.48347	Overrepresented	10.2849	peroxidase activity
GO:0052725	11	1	0.0688532	Overrepresented	11.079	inositol-1,3,4-trisphosphate 6-kinase activity
GO:0004674	2183	7	13.6642	Underrepresented	11.9555	protein serine/threonine kinase activity
GO:0004478	12	1	0.0751126	Overrepresented	12.049	methionine adenosyltransferase activity
GO:0008080	73	2	0.456935	Overrepresented	12.7003	N-acetyltransferase activity
GO:0005034	13	1	0.081372	Overrepresented	13.013	osmosensor activity
GO:0010427	13	1	0.081372	Overrepresented	13.013	abscisic acid binding
GO:0090440	13	1	0.081372	Overrepresented	13.013	abscisic acid transporter activity
GO:0005253	14	1	0.0876314	Overrepresented	13.9711	anion channel activity
GO:0016629	14	1	0.0876314	Overrepresented	13.9711	12-oxophytodienoate reductase activity
GO:0016639	14	1	0.0876314	Overrepresented	13.9711	oxidoreductase activity, acting on the CH-NH2 group of donors, NAD or NADP as acceptor
GO:0047627	14	1	0.0876314	Overrepresented	13.9711	adenylylsulfatase activity
GO:0016174	15	1	0.0938908	Overrepresented	14.9232	NAD(P)H oxidase activity
GO:0004739	16	1	0.10015	Overrepresented	15.8694	pyruvate dehydrogenase (acetyl-transferring) activity
GO:0046983	740	1	4.63195	Underrepresented	16.4813	protein dimerization activity
GO:0004722	282	4	1.76515	Overrepresented	16.784	protein serine/threonine phosphatase activity
GO:0010295	18	1	0.112669	Overrepresented	17.7442	(+)-abscisic acid 8'-hydroxylase activity
GO:0016208	18	1	0.112669	Overrepresented	17.7442	AMP binding
GO:0016866	18	1	0.112669	Overrepresented	17.7442	intramolecular transferase activity
GO:0050664	18	1	0.112669	Overrepresented	17.7442	oxidoreductase activity, acting on NAD(P)H, oxygen as acceptor
GO:0004708	19	1	0.118928	Overrepresented	18.6728	MAP kinase kinase activity
GO:0005313	20	1	0.125188	Overrepresented	19.5957	L-glutamate transmembrane transporter activity
GO:0010011	20	1	0.125188	Overrepresented	19.5957	auxin binding
GO:0010328	20	1	0.125188	Overrepresented	19.5957	auxin influx transmembrane transporter activity
GO:0016688	20	1	0.125188	Overrepresented	19.5957	L-ascorbate peroxidase activity
GO:0004386	300	4	1.87782	Overrepresented	19.8075	helicase activity
GO:0015114	21	1	0.131447	Overrepresented	20.5129	phosphate ion transmembrane transporter activity
GO:0016876	21	1	0.131447	Overrepresented	20.5129	ligase activity, forming aminoacyl-tRNA and related compounds
GO:0042937	21	1	0.131447	Overrepresented	20.5129	tripeptide transporter activity
GO:0001664	22	1	0.137706	Overrepresented	21.4244	G-protein coupled receptor binding
GO:0019001	22	1	0.137706	Overrepresented	21.4244	guanyl nucleotide binding
GO:0031683	22	1	0.137706	Overrepresented	21.4244	G-protein beta/gamma-subunit complex binding
GO:0042936	22	1	0.137706	Overrepresented	21.4244	dipeptide transporter activity
GO:0004806	101	2	0.632198	Overrepresented	21.8475	triglyceride lipase activity
GO:0003724	23	1	0.143966	Overrepresented	22.3302	RNA helicase activity
GO:0000175	24	1	0.150225	Overrepresented	23.2304	3'-5'-exoribonuclease activity
GO:0005345	27	1	0.169003	Overrepresented	25.8976	purine nucleobase transmembrane transporter activity
GO:0015181	27	1	0.169003	Overrepresented	25.8976	arginine transmembrane transporter activity
GO:0015189	27	1	0.169003	Overrepresented	25.8976	L-lysine transmembrane transporter activity
GO:0043531	543	6	3.39885	Overrepresented	26.4978	ADP binding
GO:0015326	28	1	0.175263	Overrepresented	26.7756	cationic amino acid transmembrane transporter activity
GO:0016624	28	1	0.175263	Overrepresented	26.7756	oxidoreductase activity, acting on the aldehyde or oxo group of donors, disulfide as acceptor
GO:0016301	2134	8	13.3575	Underrepresented	27.0262	kinase activity
GO:0008026	224	3	1.4021	Overrepresented	27.4283	ATP-dependent helicase activity
GO:0004003	29	1	0.181522	Overrepresented	27.6482	ATP-dependent DNA helicase activity
GO:0009927	29	1	0.181522	Overrepresented	27.6482	histidine phosphotransfer kinase activity
GO:0043565	887	2	5.55208	Underrepresented	31.8298	sequence-specific DNA binding
GO:0015238	133	2	0.832498	Overrepresented	33.536	drug transmembrane transporter activity
GO:0004089	37	1	0.231597	Overrepresented	34.4367	carbonate dehydratase activity
GO:0004871	256	3	1.6024	Overrepresented	35.7703	signal transducer activity
GO:0051082	257	3	1.60866	Overrepresented	36.0396	unfolded protein binding
GO:0005543	141	2	0.882573	Overrepresented	36.5674	phospholipid binding
GO:0003690	40	1	0.250375	Overrepresented	36.8964	double-stranded DNA binding
GO:0004673	41	1	0.256635	Overrepresented	37.7062	protein histidine kinase activity
GO:0008757	43	1	0.269154	Overrepresented	39.3106	S-adenosylmethionine-dependent methyltransferase activity
GO:0016491	1468	5	9.18878	Underrepresented	39.4286	oxidoreductase activity
GO:0019843	44	1	0.275413	Overrepresented	40.1053	rRNA binding
GO:0015297	153	2	0.957686	Overrepresented	41.1525	antiporter activity
GO:0000155	47	1	0.294191	Overrepresented	42.4601	phosphorelay sensor kinase activity
GO:0003887	49	1	0.30671	Overrepresented	44.0056	DNA-directed DNA polymerase activity
GO:0046872	549	1	3.4364	Underrepresented	45.6437	metal ion binding
GO:0004857	166	2	1.03906	Overrepresented	46.1399	enzyme inhibitor activity
GO:0003697	55	1	0.344266	Overrepresented	48.5284	single-stranded DNA binding
GO:0004028	56	1	0.350526	Overrepresented	49.2659	3-chloroallyl aldehyde dehydrogenase activity
GO:0015020	58	1	0.363044	Overrepresented	50.7272	glucuronosyltransferase activity
GO:0015171	178	2	1.11417	Overrepresented	50.734	amino acid transmembrane transporter activity
GO:0047262	59	1	0.369304	Overrepresented	51.451	polygalacturonate 4-alpha-galacturonosyltransferase activity
GO:0015079	60	1	0.375563	Overrepresented	52.1703	potassium ion transmembrane transporter activity
GO:0016538	61	1	0.381823	Overrepresented	52.8852	cyclin-dependent protein serine/threonine kinase regulator activity
GO:0003725	63	1	0.394341	Overrepresented	54.3016	double-stranded RNA binding
GO:0030599	196	2	1.22684	Overrepresented	57.5584	pectinesterase activity
GO:0004518	70	1	0.438157	Overrepresented	59.1224	nuclease activity
GO:0030276	71	1	0.444416	Overrepresented	59.7941	clathrin binding
GO:0080043	71	1	0.444416	Overrepresented	59.7941	quercetin 3-O-glucosyltransferase activity
GO:0004672	2453	11	15.3543	Underrepresented	59.8411	protein kinase activity
GO:0005515	4182	21	26.1768	Underrepresented	60.4623	protein binding
GO:0004872	74	1	0.463195	Overrepresented	61.7842	receptor activity
GO:0005525	495	1	3.0984	Underrepresented	63.9508	GTP binding
GO:0005215	955	8	5.97771	Overrepresented	66.8939	transporter activity
GO:0008017	85	1	0.532048	Overrepresented	68.771	microtubule binding
GO:0004221	87	1	0.544567	Overrepresented	69.9906	ubiquitin thiolesterase activity
GO:0016887	585	5	3.66174	Overrepresented	70.2584	ATPase activity
GO:0008762	90	1	0.563345	Overrepresented	71.7918	UDP-N-acetylmuramate dehydrogenase activity
GO:0004812	94	1	0.588382	Overrepresented	74.1416	aminoacyl-tRNA ligase activity
GO:0010181	94	1	0.588382	Overrepresented	74.1416	FMN binding
GO:0035251	94	1	0.588382	Overrepresented	74.1416	UDP-glucosyltransferase activity
GO:0030145	95	1	0.594642	Overrepresented	74.7199	manganese ion binding
GO:0016791	96	1	0.600901	Overrepresented	75.2947	phosphatase activity
GO:0035091	96	1	0.600901	Overrepresented	75.2947	phosphatidylinositol binding
GO:0003824	2676	13	16.7501	Underrepresented	75.3646	catalytic activity
GO:0004712	101	1	0.632198	Overrepresented	78.1153	protein serine/threonine/tyrosine kinase activity
GO:0020037	750	6	4.69454	Overrepresented	79.9434	heme binding
GO:0050897	107	1	0.669754	Overrepresented	81.386	cobalt ion binding
GO:0000156	108	1	0.676014	Overrepresented	81.9193	phosphorelay response regulator activity
GO:0016829	109	1	0.682273	Overrepresented	82.4493	lyase activity
GO:0004497	112	1	0.701051	Overrepresented	84.0196	monooxygenase activity
GO:0046982	118	1	0.738608	Overrepresented	87.0735	protein heterodimerization activity
GO:0004650	126	1	0.788683	Overrepresented	90.9716	polygalacturonase activity
GO:0003779	127	1	0.794942	Overrepresented	91.4453	actin binding
GO:0016614	139	1	0.870055	Overrepresented	96.9054	oxidoreductase activity, acting on CH-OH group of donors
GO:0045735	143	1	0.895092	Overrepresented	98.6365	nutrient reservoir activity
GO:0003700	3846	21	24.0736	Underrepresented	100.12	sequence-specific DNA binding transcription factor activity
GO:0017111	672	5	4.20631	Overrepresented	103.083	nucleoside-triphosphatase activity
GO:0003735	733	3	4.58813	Underrepresented	106.371	structural constituent of ribosome
GO:0003676	1718	12	10.7536	Overrepresented	106.894	nucleic acid binding
GO:0008194	233	2	1.45844	Overrepresented	110.043	UDP-glycosyltransferase activity
GO:0004252	244	2	1.52729	Overrepresented	111.314	serine-type endopeptidase activity
GO:0042626	248	2	1.55233	Overrepresented	111.798	ATPase activity, coupled to transmembrane movement of substances
GO:0003924	269	2	1.68377	Overrepresented	114.487	GTPase activity
GO:0003723	1047	5	6.55358	Underrepresented	115.791	RNA binding
GO:0031072	282	2	1.76515	Overrepresented	116.244	heat shock protein binding
GO:0004091	297	2	1.85904	Overrepresented	118.329	carboxylesterase activity
GO:0042802	318	2	1.99048	Overrepresented	121.3	identical protein binding
GO:0050660	319	2	1.99674	Overrepresented	121.442	flavin adenine dinucleotide binding
GO:0016758	408	3	2.55383	Overrepresented	124.329	transferase activity, transferring hexosyl groups
GO:0019825	441	3	2.76039	Overrepresented	126.429	oxygen binding
GO:0005524	4522	26	28.3049	Underrepresented	128.544	ATP binding
GO:0005507	534	2	3.34251	Underrepresented	129.969	copper ion binding
GO:0005509	539	2	3.37381	Underrepresented	130.088	calcium ion binding
GO:0000166	2506	14	15.686	Underrepresented	132.948	nucleotide binding
GO:0004842	619	4	3.87456	Overrepresented	133.061	ubiquitin-protein ligase activity
GO:0008270	3032	17	18.9785	Underrepresented	135.773	zinc ion binding
GO:0016757	955	6	5.97771	Overrepresented	139.74	transferase activity, transferring glycosyl groups
GO:0009055	970	5	6.0716	Underrepresented	139.922	electron carrier activity
GO:0016772	2469	14	15.4544	Underrepresented	149.639	transferase activity, transferring phosphorus-containing groups
GO:0000287	249	1	1.55859	Underrepresented	167	magnesium ion binding
GO:0003777	184	1	1.15173	Underrepresented	167	microtubule motor activity
GO:0004713	796	4	4.98247	Underrepresented	167	protein tyrosine kinase activity
GO:0005506	711	4	4.45042	Underrepresented	167	iron ion binding
GO:0005516	483	3	3.02328	Underrepresented	167	calmodulin binding
GO:0008168	337	2	2.10941	Underrepresented	167	methyltransferase activity
GO:0008289	187	1	1.17051	Underrepresented	167	lipid binding
GO:0016705	503	3	3.14847	Underrepresented	167	oxidoreductase activity, acting on paired donors, with incorporation or reduction of molecular oxygen
GO:0016706	298	1	1.8653	Underrepresented	167	oxidoreductase activity, acting on paired donors, with incorporation or reduction of molecular oxygen, 2-oxoglutarate as one donor, and incorporation of one atom each of oxygen into both donors
GO:0016740	298	1	1.8653	Underrepresented	167	transferase activity
GO:0016747	260	1	1.62744	Underrepresented	167	transferase activity, transferring acyl groups other than amino-acyl groups
GO:0016787	729	4	4.56309	Underrepresented	167	hydrolase activity
GO:0016788	372	2	2.32849	Underrepresented	167	hydrolase activity, acting on ester bonds
GO:0022857	177	1	1.10791	Underrepresented	167	transmembrane transporter activity
GO:0042803	259	1	1.62118	Underrepresented	167	protein homodimerization activity

## Sheet: molecular function chart detail
Glyma Name	Annotation ID	Description		number of genes
	Glyma.01g001300	GO:0003824	catalytic activity
	Glyma.01g002600	GO:0003824	catalytic activity
	Glyma.01g016700	GO:0003824	catalytic activity
	Glyma.01g123000	GO:0003824	catalytic activity
	Glyma.01g146600	GO:0003824	catalytic activity
	Glyma.01g169800	GO:0003824	catalytic activity
	Glyma.01g191300	GO:0003824	catalytic activity
	Glyma.01g196300	GO:0003824	catalytic activity
	Glyma.01g199600	GO:0003824	catalytic activity
	Glyma.01g219300	GO:0003824	catalytic activity
	Glyma.01g232100	GO:0003824	catalytic activity
	Glyma.01g235600	GO:0003824	catalytic activity
	Glyma.02g015700	GO:0003824	catalytic activity		13
	Glyma.01g001900	GO:0016301	kinase activity
	Glyma.01g004800	GO:0016301	kinase activity
	Glyma.01g015800	GO:0016301	kinase activity
	Glyma.01g022600	GO:0016301	kinase activity
	Glyma.01g197600	GO:0016301	kinase activity
	Glyma.01g224000	GO:0016301	kinase activity
	Glyma.02g006500	GO:0016301	kinase activity
	Glyma.02g024400	GO:0016301	kinase activity
	Glyma.11g022900	GO:0016301	kinase activity		9
	Glyma.01g001900	GO:0016772	transferase activity, transferring phosphorus-containing groups
	Glyma.01g004800	GO:0016772	transferase activity, transferring phosphorus-containing groups
	Glyma.01g015800	GO:0016772	transferase activity, transferring phosphorus-containing groups
	Glyma.01g022600	GO:0016772	transferase activity, transferring phosphorus-containing groups
	Glyma.01g146600	GO:0016772	transferase activity, transferring phosphorus-containing groups
	Glyma.01g164800	GO:0016772	transferase activity, transferring phosphorus-containing groups
	Glyma.01g197600	GO:0016772	transferase activity, transferring phosphorus-containing groups
	Glyma.01g217100	GO:0016772	transferase activity, transferring phosphorus-containing groups
	Glyma.01g224000	GO:0016772	transferase activity, transferring phosphorus-containing groups
	Glyma.01g233100	GO:0016772	transferase activity, transferring phosphorus-containing groups
	Glyma.01g244200	GO:0016772	transferase activity, transferring phosphorus-containing groups
	Glyma.02g006500	GO:0016772	transferase activity, transferring phosphorus-containing groups
	Glyma.02g024400	GO:0016772	transferase activity, transferring phosphorus-containing groups
	Glyma.11g022900	GO:0016772	transferase activity, transferring phosphorus-containing groups		14
	Glyma.01g001900	GO:0016787	hydrolase activity
	Glyma.01g002600	GO:0016787	hydrolase activity
	Glyma.01g226000	GO:0016787	hydrolase activity
	Glyma.02g006000	GO:0016787	hydrolase activity
	Glyma.03g058000	GO:0016787	hydrolase activity
	Glyma.11g089700	GO:0016787	hydrolase activity		6
	Glyma.01g004800	GO:0005515	protein binding
	Glyma.01g013100	GO:0005515	protein binding
	Glyma.01g015700	GO:0005515	protein binding
	Glyma.01g018800	GO:0005515	protein binding
	Glyma.01g019400	GO:0005515	protein binding
	Glyma.01g022500	GO:0005515	protein binding
	Glyma.01g023600	GO:0005515	protein binding
	Glyma.01g025000	GO:0005515	protein binding
	Glyma.01g025800	GO:0005515	protein binding
	Glyma.01g028800	GO:0005515	protein binding
	Glyma.01g034200	GO:0005515	protein binding
	Glyma.01g035400	GO:0005515	protein binding
	Glyma.01g035600	GO:0005515	protein binding
	Glyma.01g042900	GO:0005515	protein binding
	Glyma.01g056800	GO:0005515	protein binding
	Glyma.01g063600	GO:0005515	protein binding
	Glyma.01g107951	GO:0005515	protein binding
	Glyma.01g136300	GO:0005515	protein binding
	Glyma.01g148600	GO:0005515	protein binding
	Glyma.01g150800	GO:0005515	protein binding
	Glyma.01g161900	GO:0005515	protein binding
	Glyma.01g164700	GO:0005515	protein binding
	Glyma.01g164800	GO:0005515	protein binding
	Glyma.01g167400	GO:0005515	protein binding
	Glyma.01g170700	GO:0005515	protein binding
	Glyma.01g175300	GO:0005515	protein binding
	Glyma.01g197600	GO:0005515	protein binding
	Glyma.01g204700	GO:0005515	protein binding
	Glyma.01g216000	GO:0005515	protein binding
	Glyma.01g216200	GO:0005515	protein binding
	Glyma.01g222700	GO:0005515	protein binding
	Glyma.01g224000	GO:0005515	protein binding
	Glyma.01g227300	GO:0005515	protein binding
	Glyma.01g229500	GO:0005515	protein binding
	Glyma.01g233400	GO:0005515	protein binding
	Glyma.02g006000	GO:0005515	protein binding
	Glyma.02g015700	GO:0005515	protein binding
	Glyma.02g017400	GO:0005515	protein binding
	Glyma.02g030000	GO:0005515	protein binding
	Glyma.02g032100	GO:0005515	protein binding
	Glyma.03g245200	GO:0005515	protein binding
	Glyma.11g021000	GO:0005515	protein binding
	Glyma.11g022900	GO:0005515	protein binding
	Glyma.11g074900	GO:0005515	protein binding
	Glyma.14g062100	GO:0005515	protein binding
	Glyma.16g170300	GO:0005515	protein binding
	Glyma.18g199400	GO:0005515	protein binding
	Glyma.19g220200	GO:0005515	protein binding
	Glyma.20g200500	GO:0005515	protein binding		49
	Glyma.01g005000	GO:0003676	nucleic acid binding
	Glyma.01g010400	GO:0003676	nucleic acid binding
	Glyma.01g015500	GO:0003676	nucleic acid binding
	Glyma.01g016900	GO:0003676	nucleic acid binding
	Glyma.01g038100	GO:0003676	nucleic acid binding
	Glyma.01g167400	GO:0003676	nucleic acid binding
	Glyma.01g175300	GO:0003676	nucleic acid binding
	Glyma.01g187400	GO:0003676	nucleic acid binding
	Glyma.01g209100	GO:0003676	nucleic acid binding
	Glyma.01g227200	GO:0003676	nucleic acid binding
	Glyma.01g227300	GO:0003676	nucleic acid binding
	Glyma.01g229400	GO:0003676	nucleic acid binding		12
	Glyma.01g005000	GO:0003700	sequence-specific DNA binding transcription factor activity
	Glyma.01g019400	GO:0003700	sequence-specific DNA binding transcription factor activity
	Glyma.01g022500	GO:0003700	sequence-specific DNA binding transcription factor activity
	Glyma.01g025000	GO:0003700	sequence-specific DNA binding transcription factor activity
	Glyma.01g056800	GO:0003700	sequence-specific DNA binding transcription factor activity
	Glyma.01g123000	GO:0003700	sequence-specific DNA binding transcription factor activity
	Glyma.01g136300	GO:0003700	sequence-specific DNA binding transcription factor activity
	Glyma.01g162600	GO:0003700	sequence-specific DNA binding transcription factor activity
	Glyma.01g170700	GO:0003700	sequence-specific DNA binding transcription factor activity
	Glyma.01g204700	GO:0003700	sequence-specific DNA binding transcription factor activity
	Glyma.01g206600	GO:0003700	sequence-specific DNA binding transcription factor activity
	Glyma.01g209100	GO:0003700	sequence-specific DNA binding transcription factor activity
	Glyma.01g213100	GO:0003700	sequence-specific DNA binding transcription factor activity
	Glyma.01g216000	GO:0003700	sequence-specific DNA binding transcription factor activity
	Glyma.01g216200	GO:0003700	sequence-specific DNA binding transcription factor activity
	Glyma.01g217500	GO:0003700	sequence-specific DNA binding transcription factor activity
	Glyma.01g219800	GO:0003700	sequence-specific DNA binding transcription factor activity
	Glyma.01g231000	GO:0003700	sequence-specific DNA binding transcription factor activity
	Glyma.01g233400	GO:0003700	sequence-specific DNA binding transcription factor activity
	Glyma.06g085700	GO:0003700	sequence-specific DNA binding transcription factor activity
	Glyma.11g074900	GO:0003700	sequence-specific DNA binding transcription factor activity
	Glyma.20g200500	GO:0003700	sequence-specific DNA binding transcription factor activity		22
	Glyma.01g005000	GO:0003677	DNA binding
	Glyma.01g022500	GO:0003677	DNA binding
	Glyma.01g025000	GO:0003677	DNA binding
	Glyma.01g162600	GO:0003677	DNA binding
	Glyma.01g167400	GO:0003677	DNA binding
	Glyma.01g170700	GO:0003677	DNA binding
	Glyma.01g175300	GO:0003677	DNA binding
	Glyma.01g187400	GO:0003677	DNA binding
	Glyma.01g198900	GO:0003677	DNA binding
	Glyma.01g206600	GO:0003677	DNA binding
	Glyma.01g216000	GO:0003677	DNA binding
	Glyma.01g216200	GO:0003677	DNA binding
	Glyma.01g217500	GO:0003677	DNA binding
	Glyma.01g219800	GO:0003677	DNA binding
	Glyma.01g227200	GO:0003677	DNA binding
	Glyma.01g231000	GO:0003677	DNA binding
	Glyma.01g233400	GO:0003677	DNA binding
	Glyma.06g085700	GO:0003677	DNA binding
	Glyma.11g038500	GO:0003677	DNA binding
	Glyma.11g075500	GO:0003677	DNA binding		20
	Glyma.01g010400	GO:0003723	RNA binding
	Glyma.01g016900	GO:0003723	RNA binding
	Glyma.01g038100	GO:0003723	RNA binding
	Glyma.01g153400	GO:0003723	RNA binding
	Glyma.01g227200	GO:0003723	RNA binding
	Glyma.01g227300	GO:0003723	RNA binding
	Glyma.01g227700	GO:0003723	RNA binding
	Glyma.01g229400	GO:0003723	RNA binding
	Glyma.02g004100	GO:0003723	RNA binding
	Glyma.18g199400	GO:0003723	RNA binding		10
	Glyma.01g011100	GO:0005198	structural molecule activity		1
	Glyma.01g015500	GO:0000166	nucleotide binding
	Glyma.01g016500	GO:0000166	nucleotide binding
	Glyma.01g016900	GO:0000166	nucleotide binding
	Glyma.01g029600	GO:0000166	nucleotide binding
	Glyma.01g032500	GO:0000166	nucleotide binding
	Glyma.01g036800	GO:0000166	nucleotide binding
	Glyma.01g171300	GO:0000166	nucleotide binding
	Glyma.01g187400	GO:0000166	nucleotide binding
	Glyma.01g204600	GO:0000166	nucleotide binding
	Glyma.01g220900	GO:0000166	nucleotide binding
	Glyma.01g227200	GO:0000166	nucleotide binding
	Glyma.01g227300	GO:0000166	nucleotide binding
	Glyma.18g074800	GO:0000166	nucleotide binding
	Glyma.19g258100	GO:0000166	nucleotide binding		14
	Glyma.01g018800	GO:0004872	receptor activity		1
	Glyma.01g025200	GO:0005215	transporter activity
	Glyma.01g026200	GO:0005215	transporter activity
	Glyma.01g035000	GO:0005215	transporter activity
	Glyma.01g112500	GO:0005215	transporter activity
	Glyma.01g209900	GO:0005215	transporter activity
	Glyma.02g006500	GO:0005215	transporter activity
	Glyma.02g022200	GO:0005215	transporter activity
	Glyma.03g063900	GO:0005215	transporter activity		8
	Glyma.01g135200	GO:0019825	oxygen binding
	Glyma.01g153300	GO:0019825	oxygen binding
	Glyma.01g179400	GO:0019825	oxygen binding		3
	Glyma.01g157400	GO:0016740	transferase activity
	Glyma.02g016800	GO:0016740	transferase activity
	Glyma.11g070900	GO:0016740	transferase activity		3
	Glyma.01g164800	GO:0004871	signal transducer activity
	Glyma.01g182000	GO:0004871	signal transducer activity
	Glyma.01g217100	GO:0004871	signal transducer activity		3
	Glyma.01g181600	GO:0016788	hydrolase activity, acting on ester bonds
	Glyma.03g058000	GO:0016788	hydrolase activity, acting on ester bonds		2
	Glyma.01g187400	GO:0003682	chromatin binding		1
	Glyma.01g235000	GO:0008289	lipid binding		1
	Glyma.11g038500	GO:0004518	nuclease activity		1

## Sheet: molecular function pie chart
number of genes	Description	molecular function	Molecular Function
49	GO:0005515	protein binding	49
22	GO:0003700	sequence-specific DNA binding transcription factor activity	22
20	GO:0003677	DNA binding	20
14	GO:0016772	transferase activity, transferring phosphorus-containing groups	14
14	GO:0000166	nucleotide binding	14
13	GO:0003824	catalytic activity	13
12	GO:0003676	nucleic acid binding	12
10	GO:0003723	RNA binding	10
9	GO:0016301	kinase activity	9
8	GO:0005215	transporter activity	8
6	GO:0016787	hydrolase activity	6
3	GO:0019825	oxygen binding	3
3	GO:0016740	transferase activity	3
3	GO:0004871	signal transducer activity	3
2	GO:0016788	hydrolase activity, acting on ester bonds	2
1	GO:0005198	structural molecule activity	1
1	GO:0004872	receptor activity	1
1	GO:0003682	chromatin binding	1
1	GO:0008289	lipid binding	1
1	GO:0004518	nuclease activity	1
			193

## Sheet: cellular component pie chart
number of genes	Glyma Name	Annotation ID	Description		Cellular Component
113		Glyma.20g200500	GO:0005634	nucleus	113
55		Glyma.19g220200	GO:0005737	cytoplasm	55
51		Glyma.19g258100	GO:0005886	plasma membrane	51
27		Glyma.20g128900	GO:0005739	mitochondrion	27
26		Glyma.18g074800	GO:0016020	membrane	26
26		Glyma.19g258100	GO:0005576	extracellular region	26
24		Glyma.19g220200	GO:0005829	cytosol	24
16		Glyma.20g048800	GO:0005622	intracellular	16
15		Glyma.03g063900	GO:0005794	Golgi apparatus	15
8		Glyma.02g002000	GO:0009536	plastid	8
8		Glyma.19g220200	GO:0005618	cell wall	8
7		Glyma.02g004100	GO:0005773	vacuole	7
7		Glyma.20g128900	GO:0005783	endoplasmic reticulum	7
7		Glyma.03g022100	GO:0043231	intracellular membrane-bounded organelle	7
5		Glyma.19g220200	GO:0005730	nucleolus	5
3		Glyma.01g232100	GO:0005777	peroxisome	3
2		Glyma.02g004100	GO:0005840	ribosome	2
2		Glyma.01g182600	GO:0009579	thylakoid	2
1		Glyma.01g227300	GO:0005654	nucleoplasm	1
1		Glyma.03g063900	GO:0005768	endosome	1
					404

## Sheet: biological process pie chart
number of genes	Annotation ID	Description		Biological Process
11	Glyma.01g182000	GO:0007165	signal transduction	11
4	Glyma.01g136300	GO:0030154	cell differentiation	4
4	Glyma.01g226000	GO:0006629	lipid metabolic process	4
3	Glyma.15g162900	GO:0016049	cell growth	3
3	Glyma.01g209900	GO:0006810	transport	3
3	Glyma.01g153400	GO:0006412	translation	3
3	Glyma.18g199400	GO:0007275	multicellular organismal development	3
3	Glyma.02g027000	GO:0006950	response to stress	3
2	Glyma.01g213100	GO:0009908	flower development	2
2	Glyma.01g123000	GO:0006259	DNA metabolic process	2
2	Glyma.01g153400	GO:0015979	photosynthesis	2
2	Glyma.02g017400	GO:0040007	growth	2
1	Glyma.01g025000	GO:0048608	reproductive structure development	1
1	Glyma.01g027900	GO:0005975	carbohydrate metabolic process	1
1	Glyma.01g155200	GO:0032502	developmental process	1
				45

## Sheet: molecular function find
Found in One or More GO Ontologies		You Searched For:
Glyma.01g001200Glyma.01g001200Glyma.01g001300Glyma.01g001300Glyma.01g001900Glyma.01g001900Glyma.01g002600
Glyma.01g002600Glyma.01g004100Glyma.01g004100Glyma.01g004800Glyma.01g004800Glyma.01g005000Glyma.01g005000
Glyma.01g005800Glyma.01g005800Glyma.01g007000Glyma.01g007000Glyma.01g009400Glyma.01g009400Glyma.01g010400
Glyma.01g010400Glyma.01g011100Glyma.01g011100Glyma.01g013100Glyma.01g013100Glyma.01g013300Glyma.01g013300
Glyma.01g013800Glyma.01g013800Glyma.01g015500Glyma.01g015500Glyma.01g015700Glyma.01g015700Glyma.01g015800
Glyma.01g015800Glyma.01g016100Glyma.01g016100Glyma.01g016300Glyma.01g016300Glyma.01g016500Glyma.01g016500
Glyma.01g016700Glyma.01g016700Glyma.01g016900Glyma.01g016900Glyma.01g018800Glyma.01g018800Glyma.01g019400
Glyma.01g019400Glyma.01g021450Glyma.01g021900Glyma.01g021900Glyma.01g022500Glyma.01g022500Glyma.01g022600
Glyma.01g022600Glyma.01g023600Glyma.01g023600Glyma.01g023767Glyma.01g025000Glyma.01g025000Glyma.01g025200
Glyma.01g025200Glyma.01g025800Glyma.01g025800Glyma.01g026200Glyma.01g026200Glyma.01g027900Glyma.01g027900
Glyma.01g028800Glyma.01g028800Glyma.01g029600Glyma.01g029600Glyma.01g031800Glyma.01g031800Glyma.01g032500
Glyma.01g032500Glyma.01g033700Glyma.01g033700Glyma.01g034200Glyma.01g034200Glyma.01g034300Glyma.01g034300
Glyma.01g034402Glyma.01g034600Glyma.01g034600Glyma.01g034800Glyma.01g034800Glyma.01g035000Glyma.01g035000
Glyma.01g035400Glyma.01g035400Glyma.01g035600Glyma.01g035600Glyma.01g036700Glyma.01g036700Glyma.01g036800
Glyma.01g036800Glyma.01g037100Glyma.01g037100Glyma.01g037200Glyma.01g037200Glyma.01g038100Glyma.01g038100
Glyma.01g038500Glyma.01g038500Glyma.01g039100Glyma.01g039100Glyma.01g042900Glyma.01g042900Glyma.01g043800
Glyma.01g043800Glyma.01g046300Glyma.01g046300Glyma.01g052900Glyma.01g052900Glyma.01g056800Glyma.01g056800
Glyma.01g063600Glyma.01g063600Glyma.01g080500Glyma.01g080500Glyma.01g097200Glyma.01g097200Glyma.01g106800
Glyma.01g106800Glyma.01g107951Glyma.01g112500Glyma.01g112500Glyma.01g115700Glyma.01g115700Glyma.01g121400
Glyma.01g121400Glyma.01g123000Glyma.01g123000Glyma.01g124000Glyma.01g124000Glyma.01g125100Glyma.01g125100
Glyma.01g135200Glyma.01g135200Glyma.01g136300Glyma.01g136300Glyma.01g142000Glyma.01g142000Glyma.01g146600
Glyma.01g146600Glyma.01g148600Glyma.01g148600Glyma.01g149700Glyma.01g149700Glyma.01g150800Glyma.01g150800
Glyma.01g152000Glyma.01g152000Glyma.01g153300Glyma.01g153300Glyma.01g153400Glyma.01g153400Glyma.01g155000
Glyma.01g155000Glyma.01g155200Glyma.01g155200Glyma.01g157400Glyma.01g157400Glyma.01g161900Glyma.01g161900
Glyma.01g162600Glyma.01g162600Glyma.01g163300Glyma.01g163300Glyma.01g164000Glyma.01g164000Glyma.01g164500
Glyma.01g164500Glyma.01g164700Glyma.01g164700Glyma.01g164800Glyma.01g164800Glyma.01g167200Glyma.01g167200
Glyma.01g167400Glyma.01g167400Glyma.01g169800Glyma.01g169800Glyma.01g170700Glyma.01g170700Glyma.01g171300
Glyma.01g171300Glyma.01g175300Glyma.01g175300Glyma.01g179400Glyma.01g179400Glyma.01g180600Glyma.01g180600
Glyma.01g181600Glyma.01g181600Glyma.01g182000Glyma.01g182000Glyma.01g182600Glyma.01g182600Glyma.01g186600
Glyma.01g186600Glyma.01g187400Glyma.01g187400Glyma.01g190600Glyma.01g190600Glyma.01g191300Glyma.01g191300
Glyma.01g193200Glyma.01g193200Glyma.01g193500Glyma.01g193500Glyma.01g196300Glyma.01g196300Glyma.01g197600
Glyma.01g197600Glyma.01g198900Glyma.01g198900Glyma.01g199600Glyma.01g199600Glyma.01g204600Glyma.01g204600
Glyma.01g204700Glyma.01g204700Glyma.01g204800Glyma.01g204800Glyma.01g206600Glyma.01g206600Glyma.01g209100
Glyma.01g209100Glyma.01g209900Glyma.01g209900Glyma.01g210700Glyma.01g210700Glyma.01g212500Glyma.01g212500
Glyma.01g213100Glyma.01g213100Glyma.01g213500Glyma.01g213500Glyma.01g213900Glyma.01g213900Glyma.01g216000
Glyma.01g216000Glyma.01g216200Glyma.01g216200Glyma.01g217100Glyma.01g217100Glyma.01g217500Glyma.01g217500
Glyma.01g218100Glyma.01g218100Glyma.01g219300Glyma.01g219300Glyma.01g219800Glyma.01g219800Glyma.01g220900
Glyma.01g220900Glyma.01g222700Glyma.01g222700Glyma.01g223300Glyma.01g223300Glyma.01g223400Glyma.01g223400
Glyma.01g223500Glyma.01g223500Glyma.01g224000Glyma.01g224000Glyma.01g224300Glyma.01g224300Glyma.01g226000
Glyma.01g226000Glyma.01g227200Glyma.01g227200Glyma.01g227300Glyma.01g227300Glyma.01g227700Glyma.01g227700
Glyma.01g229400Glyma.01g229400Glyma.01g229500Glyma.01g229500Glyma.01g231000Glyma.01g231000Glyma.01g231800
Glyma.01g231800Glyma.01g232100Glyma.01g232100Glyma.01g233100Glyma.01g233100Glyma.01g233400Glyma.01g233400
Glyma.01g233500Glyma.01g233500Glyma.01g234300Glyma.01g234300Glyma.01g235000Glyma.01g235000Glyma.01g235600
Glyma.01g235600Glyma.01g239800Glyma.01g239800Glyma.01g241200Glyma.01g241200Glyma.01g244200Glyma.01g244200
Glyma.01g245600Glyma.01g245600Glyma.02g001700Glyma.02g001700Glyma.02g002000Glyma.02g002000Glyma.02g003700
Glyma.02g003700Glyma.02g004100Glyma.02g004100Glyma.02g004600Glyma.02g004600Glyma.02g005100Glyma.02g005100
Glyma.02g006000Glyma.02g006000Glyma.02g006500Glyma.02g006500Glyma.02g006700Glyma.02g006700Glyma.02g006900
Glyma.02g006900Glyma.02g008900Glyma.02g008900Glyma.02g011200Glyma.02g011200Glyma.02g011900Glyma.02g011900
Glyma.02g015300Glyma.02g015300Glyma.02g015700Glyma.02g015700Glyma.02g016500Glyma.02g016500Glyma.02g016600
Glyma.02g016600Glyma.02g016800Glyma.02g016800Glyma.02g017400Glyma.02g017400Glyma.02g022100Glyma.02g022100
Glyma.02g022200Glyma.02g022200Glyma.02g023700Glyma.02g023700Glyma.02g024400Glyma.02g024400Glyma.02g026500
Glyma.02g026500Glyma.02g026800Glyma.02g026800Glyma.02g027000Glyma.02g027000Glyma.02g027800Glyma.02g027800
Glyma.02g030000Glyma.02g030000Glyma.02g032100Glyma.02g032100Glyma.02g033400Glyma.02g033400Glyma.03g022100
Glyma.03g022100Glyma.03g058000Glyma.03g058000Glyma.03g063900Glyma.03g063900Glyma.03g245200Glyma.03g245200
Glyma.04g059600Glyma.04g059600Glyma.05g031000Glyma.05g031000Glyma.06g085700Glyma.06g085700Glyma.06g099400
Glyma.06g099400Glyma.07g196000Glyma.07g196000Glyma.09g070300Glyma.09g070300Glyma.09g084700Glyma.09g084700
Glyma.09g229800Glyma.09g229800Glyma.10g010501Glyma.11g021000Glyma.11g021000Glyma.11g022900Glyma.11g022900
Glyma.11g033200Glyma.11g033200Glyma.11g038500Glyma.11g038500Glyma.11g070900Glyma.11g070900Glyma.11g074900
Glyma.11g074900Glyma.11g075500Glyma.11g075500Glyma.11g089700Glyma.11g089700Glyma.12g116000Glyma.12g116000
Glyma.14g062100Glyma.14g062100Glyma.15g162900Glyma.15g162900Glyma.16g159550Glyma.16g170300Glyma.16g170300
Glyma.18g074800Glyma.18g074800Glyma.18g199400Glyma.18g199400Glyma.19g105000Glyma.19g105000Glyma.19g220200
Glyma.19g220200Glyma.19g258100Glyma.19g258100Glyma.20g048800Glyma.20g048800Glyma.20g128900Glyma.20g128900
Glyma.20g200500Glyma.20g200500
Not Found in Any GO Ontologies
Glyma.01g002501Glyma.01g009700Glyma.01g009700Glyma.01g014500Glyma.01g014500Glyma.01g017000Glyma.01g017000
Glyma.01g017150Glyma.01g018651Glyma.01g024600Glyma.01g024600Glyma.01g025600Glyma.01g025600Glyma.01g035202
Glyma.01g036550Glyma.01g038400Glyma.01g038400Glyma.01g039700Glyma.01g039700Glyma.01g061800Glyma.01g061800
Glyma.01g094300Glyma.01g094300Glyma.01g127900Glyma.01g127900Glyma.01g139666Glyma.01g152600Glyma.01g152600
Glyma.01g192900Glyma.01g192900Glyma.01g230850Glyma.01g235100Glyma.01g235100Glyma.02g001800Glyma.02g001800
Glyma.02g004800Glyma.02g004800Glyma.02g006100Glyma.02g006100
Chart Details

[truncated: 7 more sheets: cellular component chart detail, cellular component find, biological process chart detail, Biological procee find, Whole Genome View, text report, GO enrichment %]
