# Supplementary material for: Unveiling Optimal Models for Phenotype Prediction in Soybean Branching: An In-depth Examination of 11 Non-linear Regression Models, Highlighting SVR and SHAP Importance
Source: Research Square preprint supplement (doi:10.21203/rs.3.rs-3232751/v1), 2023-09-07
Supplement: Supplementary file 3 [file f84d980ce97a030e5d10d093.docx]

**Supplementary Legend**

**Supplementary 1: Summary of Feature Importance Analysis**

**Supplementary Legend:**

This supplementary material complements the main findings by presenting an in-depth exploration of feature importance assessment. The focus of this supplementary analysis is to evaluate the significance of different features in the context of the studied phenomenon. Four distinct methodologies were employed to ascertain feature importance, each offering unique insights into the contribution of variables. The supplementary content is organized as follows:

**Supplementary Excel Sheets:**

The supplementary material includes separate Excel sheets dedicated to each of the four feature importance methods: Variable Ranking Importance, Permutation Importance, Correlated Matrix Importance, and SHAP Importance. Each sheet provides detailed results for the respective methodology, including calculated importance scores for individual features.

**Summary of Feature Importance:**

A comprehensive summary of the four types of feature importance is furnished in this section. The summary encapsulates the key findings extracted from the individual methodologies, highlighting the relative importance of features within the studied context. This synthesis aids in a holistic understanding of the contribution of different variables.

**The Four Kinds of Feature Importance:**

Variable Ranking Importance:

This approach assesses the significance of features by ranking them based on their impact on the target variable. Features are evaluated independently in terms of their influence, offering a straightforward hierarchy of their importance.

Permutation Importance:

Permutation importance involves systematically shuffling the values of a single feature and measuring the subsequent degradation in model performance. Features contributing significantly to model accuracy exhibit a greater decrease in performance when permuted, indicating their importance.

Correlated Matrix Importance:

This technique considers the correlations among features to determine their collective importance. Features that are strongly correlated with the target variable and exhibit high intercorrelations among themselves are considered pivotal contributors.

SHAP (SHapley Additive exPlanations) Importance:

SHAP values provide a unified framework for quantifying the impact of individual features on model predictions. This method considers the average contribution of each feature across all possible feature permutations, offering a nuanced perspective on their combined importance.

Incorporating these four diverse methodologies enhances the robustness of the feature importance assessment, facilitating a more comprehensive understanding of the variables influencing the observed phenomenon. The supplementary analysis empowers researchers and readers alike to delve deeper into the intricacies of feature importance and its implications for the broader context.

**Keywords:** feature importance, supplementary analysis, variable ranking importance, permutation importance, correlated matrix importance, SHAP importance.

**Supplementary 2: BLAST Results of 1023 Soybean SNPs from PCA Analysis**

**Supplementary Legend:**

This supplementary material, designated as Supplementary 2, elucidates the outcomes of the Basic Local Alignment Search Tool (BLAST) analysis performed on a curated set of 1023 soybean Single Nucleotide Polymorphisms (SNPs). These SNPs were initially derived from a Principal Component Analysis (PCA) undertaken with n_components = 0.99, thereby encapsulating features responsible for 99% of the variance contributing to soybean branching characteristics. The focal point of this supplementary content is to showcase the results obtained through BLAST analysis and their relevance to soybean branching traits. The content is structured as follows:

The core of this supplementary material comprises an Excel sheet containing detailed BLAST results for the 1023 soybean SNPs. The following attributes are included for each SNP:

Feature Names: Identifiers of the individual SNPs originating from the PCA analysis.

Mean SHAP Values: Average SHAP (SHapley Additive exPlanations) values associated with the respective SNPs, quantifying their contribution to soybean branching.

SHAP Ranking: Ranking of SNPs based on their SHAP values, offering insights into their relative importance.

Hit Gene Names: Names of genes matching the SNP sequences during BLAST analysis.

Query Coverage: The extent to which the query SNP sequence aligns with the hit gene sequence.

Total Score: A metric indicating the quality of the sequence alignment.

E-Value: The statistical significance of the sequence alignment.

Identity Percentage: The percentage of sequence identity between the SNP and hit gene sequences.

The BLAST analysis provides a deeper understanding of the potential relationships between the identified SNPs and genes associated with soybean branching. The supplementary content empowers researchers to interpret the impact of specific SNPs on branching traits and offers valuable insights into the molecular underpinnings of soybean development.

**Keywords:** BLAST analysis, soybean SNPs, PCA analysis, SHAP values, branching traits, gene identification.

**Supplementary 3: GO Analysis of 244 Genes**

**Supplementary Legend:**

Supplementary 3 offers an extensive exploration of the Gene Ontology (GO) analysis outcomes for a collection of 244 genes derived from the preceding BLAST analysis. This supplementary material provides a comprehensive overview of the functional characteristics and annotations of these genes, shedding light on their potential roles in the context of soybean branching. The supplementary content is structured as follows:

**Excel Sheets in Supplementary 3:**

**Submitted List:** This sheet contains a list of 253 hit genes that were submitted for GO analysis, highlighting the overlap of 9 genes among them.

**Positive Gene Distribution:** This sheet presents information on 98 genes with positive contributions to soybean branching traits.

**Negative Gene Distribution:** This sheet encompasses details of 157 genes with negative contributions to soybean branching traits.

**Negative Gene Distribution** and **Positive Gene Contribution** includes feature names (SNPs), mean SHAP values, absolute mean SHAP values, SHAP ranking, gene names, BLAST query coverage, BLAST total score, BLAST E-value, and identity coverage.

**Annotation of 244 Genes:** This sheet offers comprehensive annotation information derived from the GO analysis. It includes details such as locus, predicted protein length, top Uniref100 Viridaeplantae hit, best HSP E-value, best HSP percent coverage, top most descriptive Uniref100 Viridaeplantae hit, top Arabidopsis (TAIR10) BLASTP hit, GO Biological Process IDs and descriptions, GO Molecular Function IDs and descriptions, GO Cellular Component IDs and descriptions, PFAM IDs and names, and alternative TAIR10 IDs.

**GO Enrichment Data:** This sheet presents information on 590 GO IDs resulting from the GO analysis of the 244 genes. It includes details like GO ID, genome GO count, expressed GO count, expected expression, status, corrected P-value, and GO description.

Additionally, the supplementary material includes separate Excel sheets providing graphical representation and detailed insights into the GO analysis results:

**Molecular Function Chart Detail**

**Molecular Function Pie Chart**

**Cellular Component Pie Chart**

**Biological Process Pie Chart**

**Cellular Component Chart Detail**

**Biological Process Chart Detail**

**Whole Genome View of 244 Genes**

**Text Report**

**GO Enrichment % Report**

This comprehensive exploration of GO analysis outcomes enriches the understanding of the functional attributes of the identified genes and their implications for soybean branching traits.

**Keywords:** GO analysis, gene annotation, functional enrichment, BLAST analysis, soybean branching.
